# Supplementary material
Source: publisher figshare collection journal article supplement (https://acs.figshare.com/ndownloader/files/6509427)
Supplement: Supplementary file 1 [file 6509427]

data_PafA_combo_2_refine
_cell.length_c                    71.442
_cell.angle_beta                  90.000
_cell.volume                      925153.965
_cell.length_a                    113.797
_cell.length_b                    113.797
_cell.angle_gamma                 90.000
_cell.angle_alpha                 90.000
_space_group.name_H-M_alt         'I 4'
_space_group.name_Hall            ' I 4'
_space_group.IT_number            79
_space_group.crystal_system       tetragonal
_symmetry.space_group_name_H-M    'I 4'
_symmetry.Int_Tables_number       79
_symmetry.space_group_name_Hall   ' I 4'
_computing.structure_refinement   'PHENIX (phenix.refine: 1.10_2155)'
_refine.ls_percent_reflns_R_free  3.66694180768
_refine.pdbx_overall_phase_error  22.0582763102
_refine.ls_R_factor_obs           0.159627651823
_refine.pdbx_stereochemistry_target_values 'GeoStd + Monomer Library + CDL v1.2'
_refine.ls_number_reflns_R_free   1777
_refine.ls_percent_reflns_obs     96.6590206443
_refine.ls_R_factor_R_work        0.158322731455
_refine.pdbx_solvent_shrinkage_radii 0.9
_refine.ls_d_res_high             1.70044987468
_refine.B_iso_mean                15.2428901083
_refine.pdbx_ls_sigma_F           1.33793518587
_refine.ls_number_reflns_R_work   46683
_refine.ls_d_res_low              35.9857710894
_refine.solvent_model_details     'FLAT BULK SOLVENT MODEL'
_refine.ls_R_factor_R_free        0.176789337645
_refine.ls_number_reflns_obs      48460
_refine.pdbx_solvent_vdw_probe_radii 1.11
_diffrn_source.pdbx_wavelength    0.99
_exptl.method                     'X-RAY DIFFRACTION'
loop_
  _space_group_symop.id
  _space_group_symop.operation_xyz
  1  x,y,z
  2  -y,x,z
  3  y,-x,z
  4  -x,-y,z
  5  x+1/2,y+1/2,z+1/2
  6  -y+1/2,x+1/2,z+1/2
  7  y+1/2,-x+1/2,z+1/2
  8  -x+1/2,-y+1/2,z+1/2

loop_
  _software.pdbx_ordinal
  _software.name
  _software.version
  _software.type
  _software.contact_author
  _software.contact_author_email
  _software.location
  _software.classification
  _software.citation_id
  _software.language
  1  phenix.refine  1.10_2155  program  'Paul D. Adams'  pdadams@lbl.gov  https://www.phenix-online.org/  refinement  phenix.refine  Python/C++
  1  Phenix         1.10_2155  program  'Paul D. Adams'  pdadams@lbl.gov  https://www.phenix-online.org/  refinement  phenix         Python/C++

loop_
  _citation.id
  _citation.title
  _citation.journal_abbrev
  _citation.journal_volume
  _citation.page_first
  _citation.page_last
  _citation.year
  _citation.journal_id_ASTM
  _citation.journal_id_ISSN
  _citation.journal_id_CSD
  phenix.refine  'Towards automated crystallographic structure refinement with phenix.refine.'        'Acta Crystallogr., Sect. D: Biol. Crystallogr.'  68  352   67  2012  ABCRE6  0907-4449  0766
  phenix         'PHENIX: a comprehensive Python-based system for macromolecular structure solution'  'Acta Crystallogr., Sect. D: Biol. Crystallogr.'  66  213  221  2010  ABCRE6  0907-4449  0766

loop_
  _reflns.B_iso_Wilson_estimate
  None

loop_
  _refine.overall_SU_ML
  None

loop_
  _refine_ls_restr.type
  _refine_ls_restr.number
  _refine_ls_restr.dev_ideal
  _refine_ls_restr.weight
  _refine_ls_restr.pdbx_restraint_function
  f_bond_d            4270  0.00289863187893  ?  ?
  f_angle_d           5828    0.613537999659  ?  ?
  f_chiral_restr       639   0.0494013199644  ?  ?
  f_plane_restr        755  0.00377500862307  ?  ?
  f_dihedral_angle_d  2514     15.7831863606  ?  ?

loop_
  _refine_ls_shell.d_res_high
  _refine_ls_shell.d_res_low
  _refine_ls_shell.number_reflns_R_work
  _refine_ls_shell.R_factor_R_work
  _refine_ls_shell.percent_reflns_obs
  _refine_ls_shell.R_factor_R_free
  _refine_ls_shell.number_reflns_R_free
  3.6387  5.8413  3742  0.106654276419  94.8061819103  0.124252102581  202
  3.0148  3.6387  3796  0.122946282964  97.2834443875   0.12931369189  106
  2.6752  3.0148  3676  0.142278166636  94.4744281676  0.163408898331  212
  2.4503  2.6752  3763  0.150671510171  97.2602739726  0.178173118071  105
   2.286  2.4503  3783  0.159977132632  97.2493573265  0.205009780624  102
  2.1584   2.286  3624  0.172688089776   93.934681182  0.183576591601  210
  2.0552  2.1584  3778  0.177730003902  97.2959052279  0.219174054395  102
  1.9693  2.0552  3732  0.186223255313   96.734059098  0.184783807337  105
  1.8962  1.9693  3549  0.200133794972  91.6580578512  0.232276374753  208
  1.8329  1.8962  3453  0.225544503006  90.1331245106  0.241840870012   99
  1.7772  1.8329  3269  0.231682239025  83.8850397742  0.264488946693   99
  1.7278  1.7772  3201  0.253358205479  83.9496459481  0.265206944436  194

loop_
  _pdbx_refine_tls.id
  _pdbx_refine_tls.details
  _pdbx_refine_tls.method
  _pdbx_refine_tls.origin_x
  _pdbx_refine_tls.origin_y
  _pdbx_refine_tls.origin_z
  _pdbx_refine_tls.T[1][1]
  _pdbx_refine_tls.T[2][2]
  _pdbx_refine_tls.T[3][3]
  _pdbx_refine_tls.T[1][2]
  _pdbx_refine_tls.T[1][3]
  _pdbx_refine_tls.T[2][3]
  _pdbx_refine_tls.L[1][1]
  _pdbx_refine_tls.L[2][2]
  _pdbx_refine_tls.L[3][3]
  _pdbx_refine_tls.L[1][2]
  _pdbx_refine_tls.L[1][3]
  _pdbx_refine_tls.L[2][3]
  _pdbx_refine_tls.S[1][1]
  _pdbx_refine_tls.S[1][2]
  _pdbx_refine_tls.S[1][3]
  _pdbx_refine_tls.S[2][1]
  _pdbx_refine_tls.S[2][2]
  _pdbx_refine_tls.S[2][3]
  _pdbx_refine_tls.S[3][1]
  _pdbx_refine_tls.S[3][2]
  _pdbx_refine_tls.S[3][3]
  1  ?  refined  -2.92536819356    -23.96369907   41.605733848   0.064656029506  0.0483622135569  -0.0155717742214  -0.00650812949981   0.000715954107641  -0.00568503432898  0.000343136681331    0.00232185729153  0.00315876561809    0.00112534618685  -0.000874041598578   -0.00356150267515    -0.0038344474689   -0.0135331574791   -0.0012318170253    -0.010151489104   -0.0069863756668  0.000416823550168   0.00563763008175   -0.00406801988186   -0.00374038858148
  2  ?  refined   6.55607521444  -35.6690861788   18.655460106    0.05862540787  0.0607991746845   0.0193703690262   0.00667612700396     0.0180722172757   -0.0194797392943   0.00504969836905   0.000611136066322  0.00028732789454    0.00132868629997   0.000423290908509   0.000448207132613    -0.0034301620313    0.0106221254645  -0.00821544548258   0.00178134055043   0.00712106588357  -0.00436273762833   0.00378825077265    0.00076899099423   0.000115956680229
  3  ?  refined   10.5358077129  -36.4435386819  33.5494417659  0.0558168805823   0.028127947824  -0.0095370780478    0.0180923001513   -0.00136188118795     0.010993391457   0.00889786629019     0.0279237465114   0.0147591988582   0.000121701817106   -0.00701773276719    -0.0133765661542   -0.00362118969549   0.00331262103146   -0.0114146005095  -0.00102892888251   -0.0197965237851   -0.0144683636879    0.0115179460552     0.0140094594569    -0.0217636763015
  4  ?  refined   -13.956942338  -43.3248542975  41.4467721068  0.0772185897624  0.0311346709692   0.0747131062856    -0.021527750441  -0.000846228155591    0.0300118143795   0.00433767641613   0.000562554197823  0.00445845463743  -0.000450719962121  -6.95477796753e-05   0.000983652928024  -0.000346083808638   -0.0110861665599   -0.0144593168015   0.00705225352033  -0.00699168614726  -0.00930227541951    0.0131079477545   -0.00369733908481    -0.0112334081505
  5  ?  refined  -6.45736614549  -39.8820034499  42.2905434504  0.0670936253356  0.0252353767895   0.0428300946572   -0.0234529287995   -0.00709511361401    0.0336727263766   0.00624786101104     0.0101132927366  0.00912650690524   -0.00316536095896   -0.00605350093194  -0.000579297103085   -0.00416091530913  -0.00721213081914   -0.0235129211529   0.00933746680635  -0.00744373892187   0.00289214333318    0.0102882681249    0.00493069493557    -0.0167134005172
  6  ?  refined  -12.9139146377   -25.561697981  36.4362236179  0.0498918071965   0.038008146888   0.0300813674308  -0.00886134105933      0.011407383949   0.00359468135486  0.000971678318566     0.0026871011449  0.00227305306593  -0.000242929776906   -0.00138583272771      0.001554262344    0.00393481835136  -0.00206276581323  -0.00545248644919   0.00860247374088   -0.0164238157805   0.00538863862674   -0.0100681641729   0.000140886192675  -0.000124079201365
  7  ?  refined  -6.20809361011  -17.3216548092  10.3184282406  0.0495446672947  0.0613542699464  -0.0128954200545    0.0106398541363   -0.00905598869888   -0.0218217327289  0.000526765893583    0.00268111798777  0.00295498800084  -0.000644419934374   0.000938570293222   -0.00278483561698    0.00925984031831    0.0116985948651   -0.0094132350144  -0.00427189479473   -0.0158834994354    0.0100650716102    0.0109410947399   -0.00246588067118    -0.0104681472563
  8  ?  refined  -14.8425822923   -22.907436846  23.4541763889   0.042923230116  0.0453783224245  0.00836078302596  -0.00600877295695     0.0115416210818   -0.0152171457031   0.00181905568313  -5.21967322837e-05  0.00349978720413   0.000132154034538   -0.00243503296509   0.000152380716522    0.00195513057056   0.00265567689016  -0.00347550445287  -0.00400069532262   -0.0025635318183   0.00347896817544   0.00214140829124  -0.000602287358755     0.0035999968751
  9  ?  refined   2.25663312149  -16.7146913981  43.7521969104  0.0520083718949  0.0416338768998  -0.0093674263625   -0.0192755291381   -0.00364151678274  -0.00561891854831  0.000461268262346    0.00670583658189  0.00457317961449    0.00124559542014    0.00106905906477    0.00524255497435   -0.00798174874707  -0.00891506848942   0.00243114770161  -0.00639456954735   -0.0069497967834   0.00278708113212  -0.00735778128107   -0.00747512759869    -0.0118423308558

loop_
  _pdbx_refine_tls_group.id
  _pdbx_refine_tls_group.refine_tls_id
  _pdbx_refine_tls_group.selection
  _pdbx_refine_tls_group.selection_details
  1  1  ?  "chain 'A' and (resid   24  through  100 )"
  2  2  ?  "chain 'A' and (resid  101  through  126 )"
  3  3  ?  "chain 'A' and (resid  127  through  198 )"
  4  4  ?  "chain 'A' and (resid  199  through  241 )"
  5  5  ?  "chain 'A' and (resid  242  through  339 )"
  6  6  ?  "chain 'A' and (resid  340  through  375 )"
  7  7  ?  "chain 'A' and (resid  376  through  466 )"
  8  8  ?  "chain 'A' and (resid  467  through  490 )"
  9  9  ?  "chain 'A' and (resid  491  through  545 )"

loop_
  _atom_type.symbol
  _atom_type.scat_dispersion_real
  _atom_type.scat_dispersion_imag
  _atom_type.scat_Cromer_Mann_a1
  _atom_type.scat_Cromer_Mann_a2
  _atom_type.scat_Cromer_Mann_b1
  _atom_type.scat_Cromer_Mann_b2
  _atom_type.scat_Cromer_Mann_c
  _atom_type.scat_source
  _atom_type.scat_dispersion_source
  C   .  .   3.54356  2.42580  25.62398   1.50364  0.0  
;
2-Gaussian fit: Grosse-Kunstleve RW, Sauter NK, Adams PD:
Newsletter of the IUCr Commission on Crystallographic Computing 2004, 3, 22-31.
;
  .
  Zn  .  .  24.64596  5.25405   2.14387  29.76375  0.0  
;
2-Gaussian fit: Grosse-Kunstleve RW, Sauter NK, Adams PD:
Newsletter of the IUCr Commission on Crystallographic Computing 2004, 3, 22-31.
;
  .
  O   .  .   4.49882  3.47563  15.80542   1.70748  0.0  
;
2-Gaussian fit: Grosse-Kunstleve RW, Sauter NK, Adams PD:
Newsletter of the IUCr Commission on Crystallographic Computing 2004, 3, 22-31.
;
  .
  N   .  .   4.01032  2.96436  19.97189   1.75589  0.0  
;
2-Gaussian fit: Grosse-Kunstleve RW, Sauter NK, Adams PD:
Newsletter of the IUCr Commission on Crystallographic Computing 2004, 3, 22-31.
;
  .
  P   .  .   9.51135  5.44231   1.42069  35.72801  0.0  
;
2-Gaussian fit: Grosse-Kunstleve RW, Sauter NK, Adams PD:
Newsletter of the IUCr Commission on Crystallographic Computing 2004, 3, 22-31.
;
  .
  S   .  .   9.55732  6.39887   1.23737  29.19336  0.0  
;
2-Gaussian fit: Grosse-Kunstleve RW, Sauter NK, Adams PD:
Newsletter of the IUCr Commission on Crystallographic Computing 2004, 3, 22-31.
;
  .

loop_
  _atom_site.group_PDB
  _atom_site.id
  _atom_site.label_atom_id
  _atom_site.label_alt_id
  _atom_site.label_comp_id
  _atom_site.auth_asym_id
  _atom_site.auth_seq_id
  _atom_site.pdbx_PDB_ins_code
  _atom_site.Cartn_x
  _atom_site.Cartn_y
  _atom_site.Cartn_z
  _atom_site.occupancy
  _atom_site.B_iso_or_equiv
  _atom_site.type_symbol
  _atom_site.pdbx_formal_charge
  _atom_site.label_asym_id
  _atom_site.label_entity_id
  _atom_site.label_seq_id
  _atom_site.pdbx_PDB_model_num
  ATOM       1  O    .  ASN  A   24  ?   25.21371  -19.08252   55.53998  1.000   30.94709  O   ?  A  ?     1  1
  ATOM       2  N    .  ASN  A   24  ?   25.18762  -20.01684   58.97914  1.000   36.24193  N   ?  A  ?     1  1
  ATOM       3  CA   .  ASN  A   24  ?   25.34960  -19.01640   57.93024  1.000   34.84538  C   ?  A  ?     1  1
  ATOM       4  C    .  ASN  A   24  ?   24.77316  -19.50469   56.60588  1.000   30.92201  C   ?  A  ?     1  1
  ATOM       5  CB   .  ASN  A   24  ?   26.82662  -18.65354   57.75092  1.000   36.13944  C   ?  A  ?     1  1
  ATOM       6  CG   .  ASN  A   24  ?   27.40847  -17.94808   58.96102  1.000   37.74163  C   ?  A  ?     1  1
  ATOM       7  OD1  .  ASN  A   24  ?   26.69134  -17.29769   59.72186  1.000   39.61560  O   ?  A  ?     1  1
  ATOM       8  ND2  .  ASN  A   24  ?   28.71863  -18.06844   59.14057  1.000   36.26065  N   ?  A  ?     1  1
  ATOM       9  O    .  ALA  A   25  ?   21.25218  -19.55435   55.99265  1.000   20.20453  O   ?  A  ?     2  1
  ATOM      10  N    .  ALA  A   25  ?   23.78776  -20.39183   56.67382  1.000   26.10518  N   ?  A  ?     2  1
  ATOM      11  CA   .  ALA  A   25  ?   23.16180  -20.94134   55.48197  1.000   23.28869  C   ?  A  ?     2  1
  ATOM      12  C    .  ALA  A   25  ?   21.88572  -20.18113   55.13889  1.000   20.69014  C   ?  A  ?     2  1
  ATOM      13  CB   .  ALA  A   25  ?   22.85114  -22.42873   55.66703  1.000   25.68468  C   ?  A  ?     2  1
  ATOM      14  O    .  VAL  A   26  ?   19.06034  -21.67101   53.75490  1.000    9.26124  O   ?  A  ?     3  1
  ATOM      15  N    .  VAL  A   26  ?   21.51964  -20.24055   53.86312  1.000   20.14520  N   ?  A  ?     3  1
  ATOM      16  CA   .  VAL  A   26  ?   20.27686  -19.64325   53.38586  1.000   15.95110  C   ?  A  ?     3  1
  ATOM      17  C    .  VAL  A   26  ?   19.11694  -20.44986   53.95701  1.000   11.48820  C   ?  A  ?     3  1
  ATOM      18  CB   .  VAL  A   26  ?   20.22968  -19.60550   51.85033  1.000   17.78654  C   ?  A  ?     3  1
  ATOM      19  CG1  .  VAL  A   26  ?   18.97769  -18.89007   51.37113  1.000   17.85035  C   ?  A  ?     3  1
  ATOM      20  CG2  .  VAL  A   26  ?   21.47857  -18.94128   51.29790  1.000   18.46084  C   ?  A  ?     3  1
  ATOM      21  O    .  PRO  A   27  ?   15.76181  -20.31383   53.15696  1.000   16.35494  O   ?  A  ?     4  1
  ATOM      22  N    .  PRO  A   27  ?   18.19211  -19.83027   54.68892  1.000   14.86085  N   ?  A  ?     4  1
  ATOM      23  CA   .  PRO  A   27  ?   17.02799  -20.57786   55.18426  1.000   15.40039  C   ?  A  ?     4  1
  ATOM      24  C    .  PRO  A   27  ?   16.16941  -21.08133   54.03205  1.000   14.79386  C   ?  A  ?     4  1
  ATOM      25  CB   .  PRO  A   27  ?   16.28224  -19.54715   56.04039  1.000   14.88284  C   ?  A  ?     4  1
  ATOM      26  CG   .  PRO  A   27  ?   17.32009  -18.53361   56.40882  1.000   16.60425  C   ?  A  ?     4  1
  ATOM      27  CD   .  PRO  A   27  ?   18.23067  -18.45619   55.21791  1.000   16.36835  C   ?  A  ?     4  1
  ATOM      28  O    .  ARG  A   28  ?   14.78053  -24.81099   54.50885  1.000   15.50290  O   ?  A  ?     5  1
  ATOM      29  N    .  ARG  A   28  ?   15.89725  -22.38506   54.03765  1.000   13.81761  N   ?  A  ?     5  1
  ATOM      30  CA   .  ARG  A   28  ?   15.14615  -23.02323   52.96604  1.000   13.18410  C   ?  A  ?     5  1
  ATOM      31  C    .  ARG  A   28  ?   14.35890  -24.19637   53.52272  1.000   14.29001  C   ?  A  ?     5  1
  ATOM      32  CB   .  ARG  A   28  ?   16.06961  -23.51053   51.84225  1.000   13.93972  C   ?  A  ?     5  1
  ATOM      33  CG   .  ARG  A   28  ?   16.44137  -22.43442   50.85738  1.000   12.98380  C   ?  A  ?     5  1
  ATOM      34  CD   .  ARG  A   28  ?   17.42654  -22.94440   49.84627  1.000   16.41339  C   ?  A  ?     5  1
  ATOM      35  NE   .  ARG  A   28  ?   17.96098  -21.84685   49.05528  1.000   17.72358  N   ?  A  ?     5  1
  ATOM      36  CZ   .  ARG  A   28  ?   19.05716  -21.93076   48.31387  1.000   20.57570  C   ?  A  ?     5  1
  ATOM      37  NH1  .  ARG  A   28  ?   19.47133  -20.87502   47.62806  1.000   14.66004  N   ?  A  ?     5  1
  ATOM      38  NH2  .  ARG  A   28  ?   19.74174  -23.06725   48.26555  1.000   22.83673  N   ?  A  ?     5  1
  ATOM      39  N    .  PRO  A   29  ?   13.22374  -24.53368   52.91595  1.000   16.60273  N   ?  A  ?     6  1
  ATOM      40  CA   .  PRO  A   29  ?   12.50534  -25.74368   53.32378  1.000   15.08131  C   ?  A  ?     6  1
  ATOM      41  C    .  PRO  A   29  ?   13.24109  -26.98699   52.85097  1.000   14.15654  C   ?  A  ?     6  1
  ATOM      42  O    .  PRO  A   29  ?   14.04706  -26.94661   51.91861  1.000   11.72254  O   ?  A  ?     6  1
  ATOM      43  CB   .  PRO  A   29  ?   11.14892  -25.59799   52.62676  1.000   11.99219  C   ?  A  ?     6  1
  ATOM      44  CG   .  PRO  A   29  ?   11.46589  -24.81866   51.39317  1.000   10.65126  C   ?  A  ?     6  1
  ATOM      45  CD   .  PRO  A   29  ?   12.54494  -23.84060   51.80504  1.000   13.74811  C   ?  A  ?     6  1
  ATOM      46  N    .  LYS  A   30  ?   12.95803  -28.10956   53.51712  1.000   12.02479  N   ?  A  ?     7  1
  ATOM      47  CA   .  LYS  A   30  ?   13.58407  -29.36298   53.11023  1.000   11.66539  C   ?  A  ?     7  1
  ATOM      48  C    .  LYS  A   30  ?   12.95020  -29.91350   51.84202  1.000    9.96811  C   ?  A  ?     7  1
  ATOM      49  O    .  LYS  A   30  ?   13.59729  -30.65124   51.09079  1.000    8.11112  O   ?  A  ?     7  1
  ATOM      50  CB   .  LYS  A   30  ?   13.48630  -30.39169   54.23346  1.000   12.74772  C   ?  A  ?     7  1
  ATOM      51  CG   .  LYS  A   30  ?   14.11956  -29.94126   55.54017  1.000   14.77244  C   ?  A  ?     7  1
  ATOM      52  CD   .  LYS  A   30  ?   14.25487  -31.09780   56.50734  1.000   18.87494  C   ?  A  ?     7  1
  ATOM      53  CE   .  LYS  A   30  ?   15.22391  -30.77244   57.63375  1.000   23.55220  C   ?  A  ?     7  1
  ATOM      54  NZ   .  LYS  A   30  ?   15.55496  -31.98471   58.44548  1.000   27.51096  N   ?  A  ?     7  1
  ATOM      55  N    .  LEU  A   31  ?   11.69694  -29.55534   51.58528  1.000   10.49909  N   ?  A  ?     8  1
  ATOM      56  CA   .  LEU  A   31  ?   10.94849  -30.06553   50.44932  1.000    8.29151  C   ?  A  ?     8  1
  ATOM      57  C    .  LEU  A   31  ?    9.93096  -29.01582   50.04477  1.000    8.85290  C   ?  A  ?     8  1
  ATOM      58  O    .  LEU  A   31  ?    9.35202  -28.34667   50.90211  1.000    8.08707  O   ?  A  ?     8  1
  ATOM      59  CB   .  LEU  A   31  ?   10.24000  -31.38328   50.79629  1.000    7.85150  C   ?  A  ?     8  1
  ATOM      60  CG   .  LEU  A   31  ?    9.25678  -31.97093   49.78395  1.000    9.35880  C   ?  A  ?     8  1
  ATOM      61  CD1  .  LEU  A   31  ?    9.99769  -32.48252   48.55985  1.000    6.54762  C   ?  A  ?     8  1
  ATOM      62  CD2  .  LEU  A   31  ?    8.43479  -33.07795   50.42256  1.000   10.99214  C   ?  A  ?     8  1
  ATOM      63  N    .  VAL  A   32  ?    9.72376  -28.85807   48.74575  1.000    6.62392  N   ?  A  ?     9  1
  ATOM      64  CA   .  VAL  A   32  ?    8.58041  -28.10632   48.25488  1.000    7.52977  C   ?  A  ?     9  1
  ATOM      65  C    .  VAL  A   32  ?    7.79722  -29.01708   47.32288  1.000    8.81856  C   ?  A  ?     9  1
  ATOM      66  O    .  VAL  A   32  ?    8.38183  -29.78393   46.54985  1.000    6.35691  O   ?  A  ?     9  1
  ATOM      67  CB   .  VAL  A   32  ?    8.97602  -26.77065   47.57969  1.000   10.40758  C   ?  A  ?     9  1
  ATOM      68  CG1  .  VAL  A   32  ?   10.48255  -26.60833   47.48850  1.000    8.14215  C   ?  A  ?     9  1
  ATOM      69  CG2  .  VAL  A   32  ?    8.28358  -26.58332   46.24504  1.000   13.37003  C   ?  A  ?     9  1
  ATOM      70  N    .  VAL  A   33  ?    6.47394  -28.97947   47.45385  1.000    8.57627  N   ?  A  ?    10  1
  ATOM      71  CA   .  VAL  A   33  ?    5.56705  -29.82226   46.68511  1.000    8.35996  C   ?  A  ?    10  1
  ATOM      72  C    .  VAL  A   33  ?    4.70910  -28.91527   45.82132  1.000    7.74797  C   ?  A  ?    10  1
  ATOM      73  O    .  VAL  A   33  ?    4.04020  -28.01100   46.33659  1.000    7.60202  O   ?  A  ?    10  1
  ATOM      74  CB   .  VAL  A   33  ?    4.68171  -30.69445   47.58799  1.000    7.64894  C   ?  A  ?    10  1
  ATOM      75  CG1  .  VAL  A   33  ?    3.76957  -31.56218   46.73967  1.000    4.24827  C   ?  A  ?    10  1
  ATOM      76  CG2  .  VAL  A   33  ?    5.52991  -31.54302   48.51327  1.000    6.84445  C   ?  A  ?    10  1
  ATOM      77  N    .  GLY  A   34  ?    4.73100  -29.15265   44.51606  1.000    8.93798  N   ?  A  ?    11  1
  ATOM      78  CA   .  GLY  A   34  ?    3.85494  -28.44500   43.61069  1.000    6.88739  C   ?  A  ?    11  1
  ATOM      79  C    .  GLY  A   34  ?    2.70719  -29.32221   43.16430  1.000    6.65862  C   ?  A  ?    11  1
  ATOM      80  O    .  GLY  A   34  ?    2.89651  -30.23974   42.36098  1.000    5.34118  O   ?  A  ?    11  1
  ATOM      81  N    .  LEU  A   35  ?    1.51683  -29.06427   43.69739  1.000    9.61815  N   ?  A  ?    12  1
  ATOM      82  CA   .  LEU  A   35  ?    0.31008  -29.79063   43.32829  1.000    8.10110  C   ?  A  ?    12  1
  ATOM      83  C    .  LEU  A   35  ?   -0.50296  -28.94087   42.36547  1.000    9.98693  C   ?  A  ?    12  1
  ATOM      84  O    .  LEU  A   35  ?   -0.83492  -27.79515   42.67804  1.000    8.97717  O   ?  A  ?    12  1
  ATOM      85  CB   .  LEU  A   35  ?   -0.53958  -30.11012   44.55862  1.000    8.88475  C   ?  A  ?    12  1
  ATOM      86  CG   .  LEU  A   35  ?    0.10733  -30.74232   45.78671  1.000    7.96436  C   ?  A  ?    12  1
  ATOM      87  CD1  .  LEU  A   35  ?   -0.82520  -30.61369   46.97759  1.000   12.43481  C   ?  A  ?    12  1
  ATOM      88  CD2  .  LEU  A   35  ?    0.41829  -32.19797   45.51935  1.000    8.11125  C   ?  A  ?    12  1
  ATOM      89  N    .  VAL  A   36  ?   -0.83353  -29.49123   41.20466  1.000    9.94516  N   ?  A  ?    13  1
  ATOM      90  CA   .  VAL  A   36  ?   -1.75433  -28.82341   40.29580  1.000   11.21543  C   ?  A  ?    13  1
  ATOM      91  C    .  VAL  A   36  ?   -2.90223  -29.78164   40.00998  1.000   12.24578  C   ?  A  ?    13  1
  ATOM      92  O    .  VAL  A   36  ?   -2.69875  -30.87300   39.46104  1.000   16.62514  O   ?  A  ?    13  1
  ATOM      93  CB   .  VAL  A   36  ?   -1.05916  -28.31553   39.01766  1.000   13.56986  C   ?  A  ?    13  1
  ATOM      94  CG1  .  VAL  A   36  ?    0.35012  -28.86292   38.89406  1.000   12.98854  C   ?  A  ?    13  1
  ATOM      95  CG2  .  VAL  A   36  ?   -1.90964  -28.53082   37.76890  1.000   12.97494  C   ?  A  ?    13  1
  ATOM      96  N    .  VAL  A   37  ?   -4.09515  -29.39333   40.45110  1.000    8.57762  N   ?  A  ?    14  1
  ATOM      97  CA   .  VAL  A   37  ?   -5.30165  -30.19551   40.29483  1.000    5.24425  C   ?  A  ?    14  1
  ATOM      98  C    .  VAL  A   37  ?   -5.86695  -29.89809   38.91479  1.000    4.82900  C   ?  A  ?    14  1
  ATOM      99  O    .  VAL  A   37  ?   -6.30924  -28.78110   38.63932  1.000    6.57969  O   ?  A  ?    14  1
  ATOM     100  CB   .  VAL  A   37  ?   -6.32634  -29.89358   41.39163  1.000    7.94111  C   ?  A  ?    14  1
  ATOM     101  CG1  .  VAL  A   37  ?   -7.55543  -30.76957   41.21958  1.000   12.33661  C   ?  A  ?    14  1
  ATOM     102  CG2  .  VAL  A   37  ?   -5.70270  -30.09210   42.76212  1.000    8.83837  C   ?  A  ?    14  1
  ATOM     103  N    .  ASP  A   38  ?   -5.84744  -30.89894   38.04850  1.000    6.25309  N   ?  A  ?    15  1
  ATOM     104  CA   .  ASP  A   38  ?   -6.17303  -30.68928   36.64944  1.000    6.18801  C   ?  A  ?    15  1
  ATOM     105  C    .  ASP  A   38  ?   -7.64462  -30.31958   36.48835  1.000    8.03121  C   ?  A  ?    15  1
  ATOM     106  O    .  ASP  A   38  ?   -8.53108  -31.02475   36.98025  1.000   10.27749  O   ?  A  ?    15  1
  ATOM     107  CB   .  ASP  A   38  ?   -5.83228  -31.94866   35.86228  1.000    4.11725  C   ?  A  ?    15  1
  ATOM     108  CG   .  ASP  A   38  ?   -5.53205  -31.66044   34.42331  1.000    8.71493  C   ?  A  ?    15  1
  ATOM     109  OD1  .  ASP  A   38  ?   -6.27750  -30.86041   33.82808  1.000   13.00734  O   ?  A  ?    15  1
  ATOM     110  OD2  .  ASP  A   38  ?   -4.55036  -32.22246   33.89305  1.000    9.75197  O   ?  A  ?    15  1
  ATOM     111  N    .  GLN  A   39  ?   -7.89277  -29.19238   35.81562  1.000    9.41660  N   ?  A  ?    16  1
  ATOM     112  CA   .  GLN  A   39  ?   -9.22435  -28.67131   35.50996  1.000    7.92177  C   ?  A  ?    16  1
  ATOM     113  C    .  GLN  A   39  ?   -9.96246  -28.15389   36.74134  1.000    6.64001  C   ?  A  ?    16  1
  ATOM     114  O    .  GLN  A   39  ?  -11.19353  -28.05510   36.73042  1.000    7.47593  O   ?  A  ?    16  1
  ATOM     115  CB   .  GLN  A   39  ?  -10.08785  -29.71710   34.78813  1.000   10.09001  C   ?  A  ?    16  1
  ATOM     116  CG   .  GLN  A   39  ?  -11.13877  -29.12531   33.86774  1.000    9.61509  C   ?  A  ?    16  1
  ATOM     117  CD   .  GLN  A   39  ?  -12.13177  -30.15559   33.36448  1.000   11.01615  C   ?  A  ?    16  1
  ATOM     118  NE2  .  GLN  A   39  ?  -11.70516  -30.97531   32.40876  1.000   12.02435  N   ?  A  ?    16  1
  ATOM     119  OE1  .  GLN  A   39  ?  -13.27205  -30.20901   33.82470  1.000    8.95166  O   ?  A  ?    16  1
  ATOM     120  N    .  MET  A   40  ?   -9.25288  -27.79620   37.80713  1.000    7.40031  N   ?  A  ?    17  1
  ATOM     121  CA   .  MET  A   40  ?   -9.92468  -27.33237   39.01827  1.000    7.30722  C   ?  A  ?    17  1
  ATOM     122  C    .  MET  A   40  ?  -10.28120  -25.85948   38.87174  1.000    6.13530  C   ?  A  ?    17  1
  ATOM     123  O    .  MET  A   40  ?   -9.41878  -24.98608   38.97111  1.000    3.02079  O   ?  A  ?    17  1
  ATOM     124  CB   .  MET  A   40  ?   -9.05823  -27.55583   40.24785  1.000    6.48273  C   ?  A  ?    17  1
  ATOM     125  CG   .  MET  A   40  ?   -9.75769  -27.12495   41.51327  1.000    3.03761  C   ?  A  ?    17  1
  ATOM     126  SD   .  MET  A   40  ?   -8.83960  -27.52998   43.00068  1.000    8.28599  S   ?  A  ?    17  1
  ATOM     127  CE   .  MET  A   40  ?   -9.98745  -26.94411   44.24038  1.000   11.44624  C   ?  A  ?    17  1
  ATOM     128  N    .  ARG  A   41  ?  -11.55933  -25.58645   38.62024  1.000    8.49830  N   ?  A  ?    18  1
  ATOM     129  CA   .  ARG  A   41  ?  -12.08023  -24.23280   38.73407  1.000    8.75017  C   ?  A  ?    18  1
  ATOM     130  C    .  ARG  A   41  ?  -11.90617  -23.73391   40.16206  1.000    6.63474  C   ?  A  ?    18  1
  ATOM     131  O    .  ARG  A   41  ?  -11.98331  -24.50440   41.12094  1.000    7.06127  O   ?  A  ?    18  1
  ATOM     132  CB   .  ARG  A   41  ?  -13.56208  -24.19859   38.36068  1.000    8.77012  C   ?  A  ?    18  1
  ATOM     133  CG   .  ARG  A   41  ?  -13.89251  -24.70301   36.96752  1.000   11.11954  C   ?  A  ?    18  1
  ATOM     134  CD   .  ARG  A   41  ?  -15.38105  -24.98491   36.86136  1.000   10.74353  C   ?  A  ?    18  1
  ATOM     135  NE   .  ARG  A   41  ?  -16.16585  -23.96677   37.55355  1.000   13.19849  N   ?  A  ?    18  1
  ATOM     136  CZ   .  ARG  A   41  ?  -16.89879  -23.04036   36.94655  1.000   11.42761  C   ?  A  ?    18  1
  ATOM     137  NH1  .  ARG  A   41  ?  -17.57506  -22.15301   37.66544  1.000   13.14335  N   ?  A  ?    18  1
  ATOM     138  NH2  .  ARG  A   41  ?  -16.96445  -23.00639   35.62297  1.000   10.51935  N   ?  A  ?    18  1
  ATOM     139  O    .  TRP  A   42  ?  -12.48513  -22.46428   43.72991  1.000    9.75061  O   ?  A  ?    19  1
  ATOM     140  N    .  TRP  A   42  ?  -11.68103  -22.42592   40.30201  1.000    6.67917  N   ?  A  ?    19  1
  ATOM     141  CA   .  TRP  A   42  ?  -11.48920  -21.85420   41.63179  1.000    8.17437  C   ?  A  ?    19  1
  ATOM     142  C    .  TRP  A   42  ?  -12.67224  -22.15544   42.54783  1.000    6.35707  C   ?  A  ?    19  1
  ATOM     143  CB   .  TRP  A   42  ?  -11.25657  -20.34373   41.53039  1.000    5.87746  C   ?  A  ?    19  1
  ATOM     144  CG   .  TRP  A   42  ?  -11.35860  -19.63590   42.85161  1.000    6.29643  C   ?  A  ?    19  1
  ATOM     145  CD1  .  TRP  A   42  ?  -10.35958  -19.44552   43.76357  1.000    8.15153  C   ?  A  ?    19  1
  ATOM     146  CD2  .  TRP  A   42  ?  -12.53021  -19.03078   43.40802  1.000    6.30125  C   ?  A  ?    19  1
  ATOM     147  NE1  .  TRP  A   42  ?  -10.83933  -18.76198   44.85613  1.000   10.96801  N   ?  A  ?    19  1
  ATOM     148  CE2  .  TRP  A   42  ?  -12.16941  -18.49512   44.66236  1.000    9.86805  C   ?  A  ?    19  1
  ATOM     149  CE3  .  TRP  A   42  ?  -13.84974  -18.89173   42.96917  1.000    5.83117  C   ?  A  ?    19  1
  ATOM     150  CZ2  .  TRP  A   42  ?  -13.08095  -17.82774   45.48080  1.000    9.37601  C   ?  A  ?    19  1
  ATOM     151  CZ3  .  TRP  A   42  ?  -14.75538  -18.22756   43.78439  1.000    5.64467  C   ?  A  ?    19  1
  ATOM     152  CH2  .  TRP  A   42  ?  -14.36474  -17.70411   45.02601  1.000    6.48284  C   ?  A  ?    19  1
  ATOM     153  O    .  ASP  A   43  ?  -16.28713  -23.79765   44.15418  1.000    8.36986  O   ?  A  ?    20  1
  ATOM     154  N    .  ASP  A   43  ?  -13.89412  -22.09953   42.01855  1.000    9.76199  N   ?  A  ?    20  1
  ATOM     155  CA   .  ASP  A   43  ?  -15.08241  -22.20013   42.85911  1.000    8.04982  C   ?  A  ?    20  1
  ATOM     156  C    .  ASP  A   43  ?  -15.35659  -23.61540   43.36136  1.000    7.15731  C   ?  A  ?    20  1
  ATOM     157  CB   .  ASP  A   43  ?  -16.31002  -21.64897   42.11534  1.000    6.43311  C   ?  A  ?    20  1
  ATOM     158  CG   .  ASP  A   43  ?  -16.70822  -22.48760   40.90960  1.000    9.42988  C   ?  A  ?    20  1
  ATOM     159  OD1  .  ASP  A   43  ?  -15.90471  -23.32822   40.45500  1.000   11.68171  O   ?  A  ?    20  1
  ATOM     160  OD2  .  ASP  A   43  ?  -17.83497  -22.28984   40.40331  1.000    9.45873  O   ?  A  ?    20  1
  ATOM     161  O    .  TYR  A   44  ?  -14.77989  -26.65894   45.84185  1.000    9.00142  O   ?  A  ?    21  1
  ATOM     162  N    .  TYR  A   44  ?  -14.58237  -24.61750   42.92961  1.000    5.62885  N   ?  A  ?    21  1
  ATOM     163  CA   .  TYR  A   44  ?  -14.66839  -25.92914   43.56594  1.000    7.82138  C   ?  A  ?    21  1
  ATOM     164  C    .  TYR  A   44  ?  -14.31055  -25.84564   45.03997  1.000    5.25707  C   ?  A  ?    21  1
  ATOM     165  CB   .  TYR  A   44  ?  -13.74268  -26.92847   42.87505  1.000    8.55126  C   ?  A  ?    21  1
  ATOM     166  CG   .  TYR  A   44  ?  -14.25738  -27.47276   41.56522  1.000    8.99111  C   ?  A  ?    21  1
  ATOM     167  CD1  .  TYR  A   44  ?  -15.54621  -27.97600   41.45179  1.000   11.24790  C   ?  A  ?    21  1
  ATOM     168  CD2  .  TYR  A   44  ?  -13.44853  -27.48455   40.43948  1.000    7.50844  C   ?  A  ?    21  1
  ATOM     169  CE1  .  TYR  A   44  ?  -16.00857  -28.47991   40.24899  1.000   11.79955  C   ?  A  ?    21  1
  ATOM     170  CE2  .  TYR  A   44  ?  -13.90211  -27.98058   39.23676  1.000    9.19528  C   ?  A  ?    21  1
  ATOM     171  CZ   .  TYR  A   44  ?  -15.18105  -28.47564   39.14667  1.000    9.03482  C   ?  A  ?    21  1
  ATOM     172  OH   .  TYR  A   44  ?  -15.62896  -28.97089   37.94782  1.000    9.87595  O   ?  A  ?    21  1
  ATOM     173  O    .  LEU  A   45  ?  -14.38853  -24.73087   48.83713  1.000    9.52099  O   ?  A  ?    22  1
  ATOM     174  N    .  LEU  A   45  ?  -13.46845  -24.87965   45.40934  1.000    8.04710  N   ?  A  ?    22  1
  ATOM     175  CA   .  LEU  A   45  ?  -13.11874  -24.69031   46.81128  1.000    7.37877  C   ?  A  ?    22  1
  ATOM     176  C    .  LEU  A   45  ?  -14.33797  -24.36231   47.65905  1.000    9.73718  C   ?  A  ?    22  1
  ATOM     177  CB   .  LEU  A   45  ?  -12.08331  -23.57408   46.94931  1.000    7.88702  C   ?  A  ?    22  1
  ATOM     178  CG   .  LEU  A   45  ?  -10.65233  -23.83600   46.48509  1.000    6.06526  C   ?  A  ?    22  1
  ATOM     179  CD1  .  LEU  A   45  ?   -9.93167  -24.75206   47.46211  1.000   10.51218  C   ?  A  ?    22  1
  ATOM     180  CD2  .  LEU  A   45  ?   -9.90522  -22.52552   46.32113  1.000    5.88379  C   ?  A  ?    22  1
  ATOM     181  O    .  TYR  A   46  ?  -18.65081  -23.78644   48.42894  1.000    8.14937  O   ?  A  ?    23  1
  ATOM     182  N    .  TYR  A   46  ?  -15.32397  -23.67094   47.08988  1.000   10.16514  N   ?  A  ?    23  1
  ATOM     183  CA   .  TYR  A   46  ?  -16.43129  -23.14933   47.87915  1.000    6.73868  C   ?  A  ?    23  1
  ATOM     184  C    .  TYR  A   46  ?  -17.77906  -23.76786   47.55811  1.000    7.81236  C   ?  A  ?    23  1
  ATOM     185  CB   .  TYR  A   46  ?  -16.50993  -21.62747   47.72222  1.000    9.58479  C   ?  A  ?    23  1
  ATOM     186  CG   .  TYR  A   46  ?  -15.31578  -20.97360   48.36696  1.000   11.07718  C   ?  A  ?    23  1
  ATOM     187  CD1  .  TYR  A   46  ?  -15.21360  -20.90513   49.74862  1.000   13.05841  C   ?  A  ?    23  1
  ATOM     188  CD2  .  TYR  A   46  ?  -14.26858  -20.47160   47.60363  1.000   11.44456  C   ?  A  ?    23  1
  ATOM     189  CE1  .  TYR  A   46  ?  -14.11887  -20.33391   50.35332  1.000   16.01582  C   ?  A  ?    23  1
  ATOM     190  CE2  .  TYR  A   46  ?  -13.16693  -19.89404   48.20160  1.000    7.55936  C   ?  A  ?    23  1
  ATOM     191  CZ   .  TYR  A   46  ?  -13.09844  -19.82887   49.57550  1.000   14.21299  C   ?  A  ?    23  1
  ATOM     192  OH   .  TYR  A   46  ?  -12.00674  -19.25780   50.18004  1.000   18.40051  O   ?  A  ?    23  1
  ATOM     193  O    .  ARG  A   47  ?  -20.51302  -26.46068   47.43031  1.000   12.73382  O   ?  A  ?    24  1
  ATOM     194  N    .  ARG  A   47  ?  -17.97398  -24.28282   46.34405  1.000    7.05740  N   ?  A  ?    24  1
  ATOM     195  CA   .  ARG  A   47  ?  -19.21352  -24.99182   46.04799  1.000    5.26103  C   ?  A  ?    24  1
  ATOM     196  C    .  ARG  A   47  ?  -19.39868  -26.19149   46.96860  1.000   10.05883  C   ?  A  ?    24  1
  ATOM     197  CB   .  ARG  A   47  ?  -19.23405  -25.43339   44.58742  1.000    6.08358  C   ?  A  ?    24  1
  ATOM     198  CG   .  ARG  A   47  ?  -19.61191  -24.33849   43.61389  1.000   11.43168  C   ?  A  ?    24  1
  ATOM     199  CD   .  ARG  A   47  ?  -19.74323  -24.90837   42.22024  1.000   12.61979  C   ?  A  ?    24  1
  ATOM     200  NE   .  ARG  A   47  ?  -20.78811  -25.92363   42.16191  1.000   13.78644  N   ?  A  ?    24  1
  ATOM     201  CZ   .  ARG  A   47  ?  -20.73727  -27.00248   41.38803  1.000   17.10455  C   ?  A  ?    24  1
  ATOM     202  NH1  .  ARG  A   47  ?  -19.68303  -27.21681   40.61186  1.000   18.97546  N   ?  A  ?    24  1
  ATOM     203  NH2  .  ARG  A   47  ?  -21.73553  -27.87412   41.39885  1.000   15.68636  N   ?  A  ?    24  1
  ATOM     204  O    .  TYR  A   48  ?  -17.52672  -28.79522   50.22003  1.000    9.71696  O   ?  A  ?    25  1
  ATOM     205  N    .  TYR  A   48  ?  -18.31980  -26.92154   47.25192  1.000    9.73249  N   ?  A  ?    25  1
  ATOM     206  CA   .  TYR  A   48  ?  -18.37620  -28.10539   48.09853  1.000    7.51014  C   ?  A  ?    25  1
  ATOM     207  C    .  TYR  A   48  ?  -17.82954  -27.84433   49.49329  1.000    6.37456  C   ?  A  ?    25  1
  ATOM     208  CB   .  TYR  A   48  ?  -17.60882  -29.25948   47.45312  1.000   11.53395  C   ?  A  ?    25  1
  ATOM     209  CG   .  TYR  A   48  ?  -17.95444  -29.50454   46.00564  1.000    8.97952  C   ?  A  ?    25  1
  ATOM     210  CD1  .  TYR  A   48  ?  -19.25536  -29.35939   45.54641  1.000   10.35646  C   ?  A  ?    25  1
  ATOM     211  CD2  .  TYR  A   48  ?  -16.97600  -29.88089   45.09730  1.000    7.79852  C   ?  A  ?    25  1
  ATOM     212  CE1  .  TYR  A   48  ?  -19.57200  -29.58013   44.22143  1.000   10.49153  C   ?  A  ?    25  1
  ATOM     213  CE2  .  TYR  A   48  ?  -17.28184  -30.10179   43.77080  1.000    6.28992  C   ?  A  ?    25  1
  ATOM     214  CZ   .  TYR  A   48  ?  -18.58176  -29.95084   43.33825  1.000    9.02562  C   ?  A  ?    25  1
  ATOM     215  OH   .  TYR  A   48  ?  -18.88662  -30.17527   42.01679  1.000   11.47808  O   ?  A  ?    25  1
  ATOM     216  O    .  TYR  A   49  ?  -16.89848  -27.38994   53.20961  1.000   10.75164  O   ?  A  ?    26  1
  ATOM     217  N    .  TYR  A   49  ?  -17.70507  -26.57383   49.87712  1.000    7.27330  N   ?  A  ?    26  1
  ATOM     218  CA   .  TYR  A   49  ?  -17.01758  -26.22210   51.11477  1.000    9.54737  C   ?  A  ?    26  1
  ATOM     219  C    .  TYR  A   49  ?  -17.62552  -26.92455   52.32336  1.000   11.53276  C   ?  A  ?    26  1
  ATOM     220  CB   .  TYR  A   49  ?  -17.05065  -24.70693   51.30148  1.000   13.08725  C   ?  A  ?    26  1
  ATOM     221  CG   .  TYR  A   49  ?  -16.25942  -24.21759   52.48685  1.000   14.08601  C   ?  A  ?    26  1
  ATOM     222  CD1  .  TYR  A   49  ?  -14.89873  -23.96122   52.37821  1.000   13.80685  C   ?  A  ?    26  1
  ATOM     223  CD2  .  TYR  A   49  ?  -16.87223  -24.00585   53.71255  1.000   14.47313  C   ?  A  ?    26  1
  ATOM     224  CE1  .  TYR  A   49  ?  -14.17006  -23.51331   53.45928  1.000   16.15514  C   ?  A  ?    26  1
  ATOM     225  CE2  .  TYR  A   49  ?  -16.15376  -23.55751   54.79857  1.000   14.84594  C   ?  A  ?    26  1
  ATOM     226  CZ   .  TYR  A   49  ?  -14.80525  -23.31319   54.66875  1.000   16.41042  C   ?  A  ?    26  1
  ATOM     227  OH   .  TYR  A   49  ?  -14.09124  -22.86690   55.75487  1.000   20.43106  O   ?  A  ?    26  1
  ATOM     228  O    .  SER  A   50  ?  -19.70233  -29.64523   54.74152  1.000   11.66259  O   ?  A  ?    27  1
  ATOM     229  N    .  SER  A   50  ?  -18.95523  -27.01788   52.37559  1.000   11.04648  N   ?  A  ?    27  1
  ATOM     230  CA   .  SER  A   50  ?  -19.62100  -27.59124   53.53952  1.000   12.36134  C   ?  A  ?    27  1
  ATOM     231  C    .  SER  A   50  ?  -19.40498  -29.09258   53.67733  1.000   12.37338  C   ?  A  ?    27  1
  ATOM     232  CB   .  SER  A   50  ?  -21.12055  -27.29253   53.48760  1.000   15.57369  C   ?  A  ?    27  1
  ATOM     233  OG   .  SER  A   50  ?  -21.72548  -27.89103   52.35351  1.000   17.38477  O   ?  A  ?    27  1
  ATOM     234  O    .  LYS  A   51  ?  -17.00009  -32.78530   53.22130  1.000    9.81709  O   ?  A  ?    28  1
  ATOM     235  N    .  LYS  A   51  ?  -18.89826  -29.76322   52.64374  1.000   10.03736  N   ?  A  ?    28  1
  ATOM     236  CA   .  LYS  A   51  ?  -18.70518  -31.20613   52.69291  1.000   11.56666  C   ?  A  ?    28  1
  ATOM     237  C    .  LYS  A   51  ?  -17.25226  -31.62596   52.87278  1.000   10.73243  C   ?  A  ?    28  1
  ATOM     238  CB   .  LYS  A   51  ?  -19.26200  -31.85128   51.42133  1.000   11.36117  C   ?  A  ?    28  1
  ATOM     239  CG   .  LYS  A   51  ?  -20.77144  -31.90102   51.38859  1.000   11.90962  C   ?  A  ?    28  1
  ATOM     240  CD   .  LYS  A   51  ?  -21.26554  -32.33330   50.03073  1.000   18.93804  C   ?  A  ?    28  1
  ATOM     241  CE   .  LYS  A   51  ?  -22.71469  -32.76650   50.09327  1.000   19.80174  C   ?  A  ?    28  1
  ATOM     242  NZ   .  LYS  A   51  ?  -23.62324  -31.66973   50.53415  1.000   19.44699  N   ?  A  ?    28  1
  ATOM     243  O    .  TYR  A   52  ?  -15.29961  -30.88285   55.20276  1.000   11.02897  O   ?  A  ?    29  1
  ATOM     244  N    .  TYR  A   52  ?  -16.30209  -30.72427   52.64317  1.000   11.37650  N   ?  A  ?    29  1
  ATOM     245  CA   .  TYR  A   52  ?  -14.89590  -31.04516   52.82714  1.000   10.01001  C   ?  A  ?    29  1
  ATOM     246  C    .  TYR  A   52  ?  -14.59846  -31.33652   54.29519  1.000    9.42511  C   ?  A  ?    29  1
  ATOM     247  CB   .  TYR  A   52  ?  -14.01582  -29.89171   52.34343  1.000    5.54830  C   ?  A  ?    29  1
  ATOM     248  CG   .  TYR  A   52  ?  -14.01412  -29.68836   50.84421  1.000    7.29999  C   ?  A  ?    29  1
  ATOM     249  CD1  .  TYR  A   52  ?  -14.14455  -30.76362   49.97491  1.000   10.27581  C   ?  A  ?    29  1
  ATOM     250  CD2  .  TYR  A   52  ?  -13.87505  -28.42084   50.29868  1.000    7.62626  C   ?  A  ?    29  1
  ATOM     251  CE1  .  TYR  A   52  ?  -14.13677  -30.58032   48.60226  1.000    9.81152  C   ?  A  ?    29  1
  ATOM     252  CE2  .  TYR  A   52  ?  -13.86785  -28.22824   48.92929  1.000    8.22229  C   ?  A  ?    29  1
  ATOM     253  CZ   .  TYR  A   52  ?  -14.00014  -29.31017   48.08540  1.000    7.69478  C   ?  A  ?    29  1
  ATOM     254  OH   .  TYR  A   52  ?  -13.99359  -29.11917   46.71926  1.000    7.14096  O   ?  A  ?    29  1
  ATOM     255  N    .  GLY  A   53  ?  -13.54346  -32.11495   54.51939  1.000   14.01072  N   ?  A  ?    30  1
  ATOM     256  CA   .  GLY  A   53  ?  -13.01844  -32.32942   55.84933  1.000   14.33372  C   ?  A  ?    30  1
  ATOM     257  C    .  GLY  A   53  ?  -12.10963  -31.18848   56.26477  1.000   15.82979  C   ?  A  ?    30  1
  ATOM     258  O    .  GLY  A   53  ?  -11.98793  -30.16824   55.58720  1.000   17.36019  O   ?  A  ?    30  1
  ATOM     259  N    .  GLU  A   54  ?  -11.44240  -31.37920   57.40051  1.000   14.74089  N   ?  A  ?    31  1
  ATOM     260  CA   .  GLU  A   54  ?  -10.61513  -30.32434   57.97252  1.000   17.19404  C   ?  A  ?    31  1
  ATOM     261  C    .  GLU  A   54  ?   -9.14922  -30.40375   57.56590  1.000   14.25727  C   ?  A  ?    31  1
  ATOM     262  O    .  GLU  A   54  ?   -8.40296  -29.45464   57.82840  1.000   12.09200  O   ?  A  ?    31  1
  ATOM     263  CB   .  GLU  A   54  ?  -10.71379  -30.34912   59.50175  1.000   22.04698  C   ?  A  ?    31  1
  ATOM     264  CG   .  GLU  A   54  ?  -12.11636  -30.10190   60.02026  1.000   28.14269  C   ?  A  ?    31  1
  ATOM     265  CD   .  GLU  A   54  ?  -12.68680  -28.79081   59.51835  1.000   33.51891  C   ?  A  ?    31  1
  ATOM     266  OE1  .  GLU  A   54  ?  -11.99876  -27.75480   59.65002  1.000   35.47549  O   ?  A  ?    31  1
  ATOM     267  OE2  .  GLU  A   54  ?  -13.81258  -28.79906   58.97509  1.000   33.70295  O   ?  A  ?    31  1
  ATOM     268  N    .  GLY  A   55  ?   -8.71905  -31.49055   56.92964  1.000   12.33494  N   ?  A  ?    32  1
  ATOM     269  CA   .  GLY  A   55  ?   -7.30455  -31.68638   56.67810  1.000   11.18548  C   ?  A  ?    32  1
  ATOM     270  C    .  GLY  A   55  ?   -6.85607  -31.56290   55.23530  1.000   10.21777  C   ?  A  ?    32  1
  ATOM     271  O    .  GLY  A   55  ?   -5.66887  -31.73449   54.94689  1.000   10.41092  O   ?  A  ?    32  1
  ATOM     272  N    .  GLY  A   56  ?   -7.77791  -31.26611   54.32113  1.000    9.50334  N   ?  A  ?    33  1
  ATOM     273  CA   .  GLY  A   56  ?   -7.43697  -31.18083   52.91233  1.000    8.29900  C   ?  A  ?    33  1
  ATOM     274  C    .  GLY  A   56  ?   -7.39093  -29.76426   52.37855  1.000    7.73508  C   ?  A  ?    33  1
  ATOM     275  O    .  GLY  A   56  ?   -6.47953  -29.00091   52.71274  1.000    8.79893  O   ?  A  ?    33  1
  ATOM     276  N    .  PHE  A   57  ?   -8.36525  -29.40408   51.53691  1.000    8.74840  N   ?  A  ?    34  1
  ATOM     277  CA   .  PHE  A   57  ?   -8.43735  -28.03595   51.02913  1.000    8.89679  C   ?  A  ?    34  1
  ATOM     278  C    .  PHE  A   57  ?   -8.60315  -27.03578   52.16374  1.000   10.11848  C   ?  A  ?    34  1
  ATOM     279  O    .  PHE  A   57  ?   -8.05032  -25.92948   52.11550  1.000    9.27109  O   ?  A  ?    34  1
  ATOM     280  CB   .  PHE  A   57  ?   -9.59428  -27.89189   50.04012  1.000   10.19693  C   ?  A  ?    34  1
  ATOM     281  CG   .  PHE  A   57  ?   -9.40655  -28.65517   48.76385  1.000   11.67189  C   ?  A  ?    34  1
  ATOM     282  CD1  .  PHE  A   57  ?   -8.41708  -28.29514   47.86378  1.000   11.98093  C   ?  A  ?    34  1
  ATOM     283  CD2  .  PHE  A   57  ?  -10.23775  -29.71472   48.45123  1.000    9.12718  C   ?  A  ?    34  1
  ATOM     284  CE1  .  PHE  A   57  ?   -8.25081  -28.99151   46.68077  1.000   10.08631  C   ?  A  ?    34  1
  ATOM     285  CE2  .  PHE  A   57  ?  -10.07777  -30.41406   47.27243  1.000   11.34435  C   ?  A  ?    34  1
  ATOM     286  CZ   .  PHE  A   57  ?   -9.08109  -30.05491   46.38668  1.000    8.92818  C   ?  A  ?    34  1
  ATOM     287  N    .  LYS  A   58  ?   -9.36784  -27.40714   53.19246  1.000    9.84486  N   ?  A  ?    35  1
  ATOM     288  CA   .  LYS  A   58  ?   -9.61374  -26.48925   54.29629  1.000   11.35720  C   ?  A  ?    35  1
  ATOM     289  C    .  LYS  A   58  ?   -8.37132  -26.29013   55.15326  1.000    9.76243  C   ?  A  ?    35  1
  ATOM     290  O    .  LYS  A   58  ?   -8.21059  -25.22690   55.76187  1.000   10.73427  O   ?  A  ?    35  1
  ATOM     291  CB   .  LYS  A   58  ?  -10.78751  -26.98803   55.13964  1.000   12.81668  C   ?  A  ?    35  1
  ATOM     292  CG   .  LYS  A   58  ?  -12.12759  -26.86308   54.42673  1.000   16.53730  C   ?  A  ?    35  1
  ATOM     293  CD   .  LYS  A   58  ?  -13.28982  -27.38790   55.25844  1.000   22.59548  C   ?  A  ?    35  1
  ATOM     294  CE   .  LYS  A   58  ?  -13.56198  -26.51773   56.46879  1.000   26.51820  C   ?  A  ?    35  1
  ATOM     295  NZ   .  LYS  A   58  ?  -14.80908  -26.93779   57.16737  1.000   27.57323  N   ?  A  ?    35  1
  ATOM     296  N    .  ARG  A   59  ?   -7.48223  -27.28521   55.21551  1.000    7.34263  N   ?  A  ?    36  1
  ATOM     297  CA   .  ARG  A   59  ?   -6.21313  -27.06970   55.90375  1.000    7.67928  C   ?  A  ?    36  1
  ATOM     298  C    .  ARG  A   59  ?   -5.37340  -26.02496   55.17869  1.000    7.98989  C   ?  A  ?    36  1
  ATOM     299  O    .  ARG  A   59  ?   -4.70953  -25.19860   55.81660  1.000    8.02647  O   ?  A  ?    36  1
  ATOM     300  CB   .  ARG  A   59  ?   -5.43960  -28.38288   56.03704  1.000    9.34011  C   ?  A  ?    36  1
  ATOM     301  CG   .  ARG  A   59  ?   -4.03278  -28.19716   56.59923  1.000   12.66182  C   ?  A  ?    36  1
  ATOM     302  CD   .  ARG  A   59  ?   -3.30193  -29.51301   56.80010  1.000   14.66974  C   ?  A  ?    36  1
  ATOM     303  NE   .  ARG  A   59  ?   -1.91879  -29.30004   57.22548  1.000   18.95889  N   ?  A  ?    36  1
  ATOM     304  CZ   .  ARG  A   59  ?   -1.09732  -30.26954   57.61751  1.000   19.28372  C   ?  A  ?    36  1
  ATOM     305  NH1  .  ARG  A   59  ?   -1.51787  -31.52716   57.64302  1.000   18.49192  N   ?  A  ?    36  1
  ATOM     306  NH2  .  ARG  A   59  ?    0.14469  -29.98270   57.98646  1.000   19.60933  N   ?  A  ?    36  1
  ATOM     307  N    .  MET  A   60  ?   -5.39720  -26.03785   53.84460  1.000    8.23890  N   ?  A  ?    37  1
  ATOM     308  CA   .  MET  A   60  ?   -4.65613  -25.03042   53.09594  1.000    9.83216  C   ?  A  ?    37  1
  ATOM     309  C    .  MET  A   60  ?   -5.27581  -23.65245   53.27406  1.000   15.41878  C   ?  A  ?    37  1
  ATOM     310  O    .  MET  A   60  ?   -4.55859  -22.65979   53.43616  1.000   15.29284  O   ?  A  ?    37  1
  ATOM     311  CB   .  MET  A   60  ?   -4.60104  -25.40151   51.61689  1.000    7.10892  C   ?  A  ?    37  1
  ATOM     312  CG   .  MET  A   60  ?   -3.99428  -26.76076   51.34110  1.000   14.69522  C   ?  A  ?    37  1
  ATOM     313  SD   .  MET  A   60  ?   -3.45025  -26.90363   49.63192  1.000   15.83531  S   ?  A  ?    37  1
  ATOM     314  CE   .  MET  A   60  ?   -2.00425  -25.84530   49.65326  1.000   11.90544  C   ?  A  ?    37  1
  ATOM     315  N    .  LEU  A   61  ?   -6.60760  -23.57434   53.25117  1.000   14.99005  N   ?  A  ?    38  1
  ATOM     316  CA   .  LEU  A   61  ?   -7.28011  -22.29814   53.46379  1.000   10.93353  C   ?  A  ?    38  1
  ATOM     317  C    .  LEU  A   61  ?   -7.08662  -21.79783   54.89048  1.000   12.70643  C   ?  A  ?    38  1
  ATOM     318  O    .  LEU  A   61  ?   -6.81988  -20.60986   55.10532  1.000   15.60093  O   ?  A  ?    38  1
  ATOM     319  CB   .  LEU  A   61  ?   -8.76835  -22.43429   53.14270  1.000    8.49904  C   ?  A  ?    38  1
  ATOM     320  CG   .  LEU  A   61  ?   -9.13485  -22.79601   51.70308  1.000    8.11801  C   ?  A  ?    38  1
  ATOM     321  CD1  .  LEU  A   61  ?  -10.60724  -23.16321   51.61877  1.000    8.53209  C   ?  A  ?    38  1
  ATOM     322  CD2  .  LEU  A   61  ?   -8.82254  -21.63177   50.77671  1.000    7.84809  C   ?  A  ?    38  1
  ATOM     323  N    .  ASN  A   62  ?   -7.20238  -22.68983   55.87784  1.000   12.29021  N   ?  A  ?    39  1
  ATOM     324  CA   .  ASN  A   62  ?   -7.20380  -22.25810   57.27252  1.000   13.85031  C   ?  A  ?    39  1
  ATOM     325  C    .  ASN  A   62  ?   -5.80815  -21.96152   57.80689  1.000   14.04641  C   ?  A  ?    39  1
  ATOM     326  O    .  ASN  A   62  ?   -5.67493  -21.18186   58.75632  1.000   14.61902  O   ?  A  ?    39  1
  ATOM     327  CB   .  ASN  A   62  ?   -7.87354  -23.31030   58.15873  1.000   16.77923  C   ?  A  ?    39  1
  ATOM     328  CG   .  ASN  A   62  ?   -9.38197  -23.32826   58.00678  1.000   19.74833  C   ?  A  ?    39  1
  ATOM     329  OD1  .  ASN  A   62  ?   -9.97239  -22.40144   57.45664  1.000   22.51586  O   ?  A  ?    39  1
  ATOM     330  ND2  .  ASN  A   62  ?  -10.01482  -24.38079   58.50988  1.000   20.26455  N   ?  A  ?    39  1
  ATOM     331  N    .  THR  A   63  ?   -4.76492  -22.57593   57.24336  1.000   12.57344  N   ?  A  ?    40  1
  ATOM     332  CA   .  THR  A   63  ?   -3.40409  -22.35008   57.71300  1.000   12.11193  C   ?  A  ?    40  1
  ATOM     333  C    .  THR  A   63  ?   -2.48679  -21.72833   56.67369  1.000    8.23452  C   ?  A  ?    40  1
  ATOM     334  O    .  THR  A   63  ?   -1.34821  -21.38795   57.01094  1.000    8.22141  O   ?  A  ?    40  1
  ATOM     335  CB   .  THR  A   63  ?   -2.75851  -23.66131   58.19461  1.000   14.40609  C   ?  A  ?    40  1
  ATOM     336  OG1  .  THR  A   63  ?   -2.41965  -24.47865   57.06571  1.000   17.68923  O   ?  A  ?    40  1
  ATOM     337  CG2  .  THR  A   63  ?   -3.69897  -24.42367   59.11071  1.000   15.51297  C   ?  A  ?    40  1
  ATOM     338  N    .  GLY  A   64  ?   -2.93170  -21.58118   55.43079  1.000    6.83750  N   ?  A  ?    41  1
  ATOM     339  CA   .  GLY  A   64  ?   -2.07802  -21.02608   54.40236  1.000    9.74518  C   ?  A  ?    41  1
  ATOM     340  C    .  GLY  A   64  ?   -2.62462  -19.75489   53.78870  1.000   10.39167  C   ?  A  ?    41  1
  ATOM     341  O    .  GLY  A   64  ?   -3.46963  -19.08174   54.38576  1.000   13.11524  O   ?  A  ?    41  1
  ATOM     342  N    .  TYR  A   65  ?   -2.15604  -19.42095   52.58916  1.000    9.69097  N   ?  A  ?    42  1
  ATOM     343  CA   .  TYR  A   65  ?   -2.52630  -18.18636   51.91357  1.000    5.63452  C   ?  A  ?    42  1
  ATOM     344  C    .  TYR  A   65  ?   -3.22262  -18.51535   50.60261  1.000    3.32620  C   ?  A  ?    42  1
  ATOM     345  O    .  TYR  A   65  ?   -2.68329  -19.26349   49.78216  1.000    8.21640  O   ?  A  ?    42  1
  ATOM     346  CB   .  TYR  A   65  ?   -1.29807  -17.31325   51.64967  1.000    7.17932  C   ?  A  ?    42  1
  ATOM     347  CG   .  TYR  A   65  ?   -1.59557  -15.83782   51.71363  1.000   11.51761  C   ?  A  ?    42  1
  ATOM     348  CD1  .  TYR  A   65  ?   -2.15152  -15.17213   50.62986  1.000    9.53457  C   ?  A  ?    42  1
  ATOM     349  CD2  .  TYR  A   65  ?   -1.33344  -15.11130   52.86546  1.000   12.52819  C   ?  A  ?    42  1
  ATOM     350  CE1  .  TYR  A   65  ?   -2.42797  -13.82375   50.69034  1.000   10.37762  C   ?  A  ?    42  1
  ATOM     351  CE2  .  TYR  A   65  ?   -1.60789  -13.76370   52.93481  1.000   12.31842  C   ?  A  ?    42  1
  ATOM     352  CZ   .  TYR  A   65  ?   -2.15538  -13.12657   51.84625  1.000   10.45713  C   ?  A  ?    42  1
  ATOM     353  OH   .  TYR  A   65  ?   -2.43063  -11.78409   51.91043  1.000   12.57944  O   ?  A  ?    42  1
  ATOM     354  N    .  SER  A   66  ?   -4.40442  -17.94105   50.40139  1.000    4.94491  N   ?  A  ?    43  1
  ATOM     355  CA   .  SER  A   66  ?   -5.22805  -18.20460   49.22773  1.000    6.10182  C   ?  A  ?    43  1
  ATOM     356  C    .  SER  A   66  ?   -5.33634  -16.94004   48.38636  1.000    8.43609  C   ?  A  ?    43  1
  ATOM     357  O    .  SER  A   66  ?   -5.78245  -15.89929   48.87604  1.000    9.49283  O   ?  A  ?    43  1
  ATOM     358  CB   .  SER  A   66  ?   -6.61868  -18.69000   49.63755  1.000   10.37231  C   ?  A  ?    43  1
  ATOM     359  OG   .  SER  A   66  ?   -7.44467  -18.88648   48.50146  1.000   14.43392  O   ?  A  ?    43  1
  ATOM     360  N    .  LEU  A   67  ?   -4.93979  -17.03393   47.12527  1.000    7.56250  N   ?  A  ?    44  1
  ATOM     361  CA   .  LEU  A   67  ?   -5.09023  -15.94199   46.17189  1.000    5.45258  C   ?  A  ?    44  1
  ATOM     362  C    .  LEU  A   67  ?   -6.35051  -16.22190   45.36186  1.000    5.95606  C   ?  A  ?    44  1
  ATOM     363  O    .  LEU  A   67  ?   -6.36534  -17.12353   44.51836  1.000    6.87438  O   ?  A  ?    44  1
  ATOM     364  CB   .  LEU  A   67  ?   -3.86106  -15.82132   45.27328  1.000    8.63942  C   ?  A  ?    44  1
  ATOM     365  CG   .  LEU  A   67  ?   -2.50238  -15.44986   45.88173  1.000    9.41048  C   ?  A  ?    44  1
  ATOM     366  CD1  .  LEU  A   67  ?   -1.85226  -16.62919   46.60266  1.000   11.01239  C   ?  A  ?    44  1
  ATOM     367  CD2  .  LEU  A   67  ?   -2.63856  -14.25296   46.81442  1.000    7.73809  C   ?  A  ?    44  1
  ATOM     368  N    .  ASN  A   68  ?   -7.40979  -15.46193   45.62584  1.000    8.41736  N   ?  A  ?    45  1
  ATOM     369  CA   .  ASN  A   68  ?   -8.72300  -15.75734   45.06970  1.000    7.86142  C   ?  A  ?    45  1
  ATOM     370  C    .  ASN  A   68  ?   -8.99084  -15.05176   43.74547  1.000    7.17196  C   ?  A  ?    45  1
  ATOM     371  O    .  ASN  A   68  ?  -10.10201  -15.15956   43.21618  1.000   11.11265  O   ?  A  ?    45  1
  ATOM     372  CB   .  ASN  A   68  ?   -9.81224  -15.39848   46.08451  1.000    7.22079  C   ?  A  ?    45  1
  ATOM     373  CG   .  ASN  A   68  ?   -9.78625  -16.29880   47.30714  1.000   11.06043  C   ?  A  ?    45  1
  ATOM     374  OD1  .  ASN  A   68  ?   -9.56372  -17.50585   47.19995  1.000   11.97975  O   ?  A  ?    45  1
  ATOM     375  ND2  .  ASN  A   68  ?  -10.00746  -15.71344   48.47735  1.000   13.39910  N   ?  A  ?    45  1
  ATOM     376  N    .  ASN  A   69  ?   -8.00208  -14.35333   43.18886  1.000    4.28023  N   ?  A  ?    46  1
  ATOM     377  CA   .  ASN  A   69  ?   -8.17631  -13.61143   41.94679  1.000    4.43163  C   ?  A  ?    46  1
  ATOM     378  C    .  ASN  A   69  ?   -6.94915  -13.81572   41.05560  1.000    8.01285  C   ?  A  ?    46  1
  ATOM     379  O    .  ASN  A   69  ?   -6.26558  -12.87779   40.65763  1.000   10.06810  O   ?  A  ?    46  1
  ATOM     380  CB   .  ASN  A   69  ?   -8.42039  -12.12908   42.22831  1.000    3.58211  C   ?  A  ?    46  1
  ATOM     381  CG   .  ASN  A   69  ?   -8.81627  -11.35552   40.98461  1.000    7.36773  C   ?  A  ?    46  1
  ATOM     382  OD1  .  ASN  A   69  ?   -9.37893  -11.91618   40.04586  1.000    7.55752  O   ?  A  ?    46  1
  ATOM     383  ND2  .  ASN  A   69  ?   -8.52359  -10.06120   40.97319  1.000    6.15670  N   ?  A  ?    46  1
  ATOM     384  N    .  VAL  A   70  ?   -6.66007  -15.07436   40.73652  1.000    5.01781  N   ?  A  ?    47  1
  ATOM     385  CA   .  VAL  A   70  ?   -5.55471  -15.44050   39.85853  1.000    2.96807  C   ?  A  ?    47  1
  ATOM     386  C    .  VAL  A   70  ?   -6.13215  -15.90255   38.53192  1.000    5.43246  C   ?  A  ?    47  1
  ATOM     387  O    .  VAL  A   70  ?   -7.00268  -16.78070   38.50020  1.000    6.72032  O   ?  A  ?    47  1
  ATOM     388  CB   .  VAL  A   70  ?   -4.67885  -16.54207   40.47710  1.000    2.96783  C   ?  A  ?    47  1
  ATOM     389  CG1  .  VAL  A   70  ?   -3.51028  -16.87248   39.55873  1.000    8.20223  C   ?  A  ?    47  1
  ATOM     390  CG2  .  VAL  A   70  ?   -4.18809  -16.11682   41.83797  1.000    2.96796  C   ?  A  ?    47  1
  ATOM     391  N    .  HIS  A   71  ?   -5.64334  -15.32374   37.43992  1.000    2.96087  N   ?  A  ?    48  1
  ATOM     392  CA   .  HIS  A   71  ?   -6.08776  -15.70608   36.11095  1.000    8.77993  C   ?  A  ?    48  1
  ATOM     393  C    .  HIS  A   71  ?   -4.90218  -16.10394   35.24670  1.000    6.83504  C   ?  A  ?    48  1
  ATOM     394  O    .  HIS  A   71  ?   -3.77719  -15.63231   35.43480  1.000    6.94503  O   ?  A  ?    48  1
  ATOM     395  CB   .  HIS  A   71  ?   -6.87543  -14.58215   35.42524  1.000    8.24048  C   ?  A  ?    48  1
  ATOM     396  CG   .  HIS  A   71  ?   -8.26718  -14.42156   35.95084  1.000    6.64583  C   ?  A  ?    48  1
  ATOM     397  CD2  .  HIS  A   71  ?   -9.45159  -14.90258   35.50462  1.000   10.14487  C   ?  A  ?    48  1
  ATOM     398  ND1  .  HIS  A   71  ?   -8.55008  -13.71134   37.09675  1.000    6.48374  N   ?  A  ?    48  1
  ATOM     399  CE1  .  HIS  A   71  ?   -9.85082  -13.74550   37.32437  1.000    9.11583  C   ?  A  ?    48  1
  ATOM     400  NE2  .  HIS  A   71  ?  -10.42076  -14.46392   36.37412  1.000    9.64517  N   ?  A  ?    48  1
  ATOM     401  N    .  ILE  A   72  ?   -5.18031  -16.98554   34.29584  1.000    9.47696  N   ?  A  ?    49  1
  ATOM     402  CA   .  ILE  A   72  ?   -4.19265  -17.42523   33.32023  1.000    7.13163  C   ?  A  ?    49  1
  ATOM     403  C    .  ILE  A   72  ?   -4.02532  -16.33593   32.27142  1.000    6.56401  C   ?  A  ?    49  1
  ATOM     404  O    .  ILE  A   72  ?   -5.00488  -15.89797   31.65817  1.000    7.20956  O   ?  A  ?    49  1
  ATOM     405  CB   .  ILE  A   72  ?   -4.63054  -18.74990   32.68035  1.000    2.95223  C   ?  A  ?    49  1
  ATOM     406  CG1  .  ILE  A   72  ?   -4.79220  -19.83139   33.75124  1.000    5.48209  C   ?  A  ?    49  1
  ATOM     407  CG2  .  ILE  A   72  ?   -3.64857  -19.16720   31.62255  1.000    4.26253  C   ?  A  ?    49  1
  ATOM     408  CD1  .  ILE  A   72  ?   -5.36941  -21.12162   33.22845  1.000    2.96703  C   ?  A  ?    49  1
  ATOM     409  N    .  ASP  A   73  ?   -2.78567  -15.89680   32.05713  1.000    9.22765  N   ?  A  ?    50  1
  ATOM     410  CA   .  ASP  A   73  ?   -2.50724  -14.74488   31.19967  1.000    7.83365  C   ?  A  ?    50  1
  ATOM     411  C    .  ASP  A   73  ?   -2.08373  -15.14534   29.78907  1.000    7.42413  C   ?  A  ?    50  1
  ATOM     412  O    .  ASP  A   73  ?   -1.22255  -14.49834   29.18642  1.000    8.29077  O   ?  A  ?    50  1
  ATOM     413  CB   .  ASP  A   73  ?   -1.46066  -13.83772   31.84668  1.000    9.92716  C   ?  A  ?    50  1
  ATOM     414  CG   .  ASP  A   73  ?   -0.34255  -14.60480   32.52791  1.000   14.40571  C   ?  A  ?    50  1
  ATOM     415  OD1  .  ASP  A   73  ?   -0.59408  -15.70948   33.05397  1.000   15.54172  O   ?  A  ?    50  1
  ATOM     416  OD2  .  ASP  A   73  ?    0.79421  -14.08533   32.55083  1.000   17.68636  O   ?  A  ?    50  1
  ATOM     417  N    .  TYR  A   74  ?   -2.68936  -16.19465   29.23458  1.000    7.51456  N   ?  A  ?    51  1
  ATOM     418  CA   .  TYR  A   74  ?   -2.48761  -16.57411   27.84072  1.000    2.91837  C   ?  A  ?    51  1
  ATOM     419  C    .  TYR  A   74  ?   -3.69171  -17.38522   27.38387  1.000    6.82084  C   ?  A  ?    51  1
  ATOM     420  O    .  TYR  A   74  ?   -4.56029  -17.74901   28.17905  1.000    6.16617  O   ?  A  ?    51  1
  ATOM     421  CB   .  TYR  A   74  ?   -1.20875  -17.39440   27.65368  1.000    5.86718  C   ?  A  ?    51  1
  ATOM     422  CG   .  TYR  A   74  ?   -1.21545  -18.64716   28.49641  1.000    7.87064  C   ?  A  ?    51  1
  ATOM     423  CD1  .  TYR  A   74  ?   -1.92085  -19.78196   28.09687  1.000    3.73832  C   ?  A  ?    51  1
  ATOM     424  CD2  .  TYR  A   74  ?   -0.54134  -18.68731   29.70412  1.000    9.67006  C   ?  A  ?    51  1
  ATOM     425  CE1  .  TYR  A   74  ?   -1.94901  -20.91074   28.87573  1.000    4.18658  C   ?  A  ?    51  1
  ATOM     426  CE2  .  TYR  A   74  ?   -0.55336  -19.81539   30.48304  1.000    7.39158  C   ?  A  ?    51  1
  ATOM     427  CZ   .  TYR  A   74  ?   -1.26064  -20.92081   30.06720  1.000    6.08522  C   ?  A  ?    51  1
  ATOM     428  OH   .  TYR  A   74  ?   -1.27254  -22.04061   30.85254  1.000    5.60859  O   ?  A  ?    51  1
  ATOM     429  N    .  VAL  A   75  ?   -3.71030  -17.68894   26.09105  1.000    4.97999  N   ?  A  ?    52  1
  ATOM     430  CA   .  VAL  A   75  ?   -4.60193  -18.69362   25.52954  1.000    6.62638  C   ?  A  ?    52  1
  ATOM     431  C    .  VAL  A   75  ?   -3.75993  -19.55803   24.58806  1.000    8.75610  C   ?  A  ?    52  1
  ATOM     432  O    .  VAL  A   75  ?   -2.76058  -19.08128   24.04606  1.000    6.72688  O   ?  A  ?    52  1
  ATOM     433  CB   .  VAL  A   75  ?   -5.81132  -18.05688   24.80156  1.000    7.89615  C   ?  A  ?    52  1
  ATOM     434  CG1  .  VAL  A   75  ?   -6.75646  -17.40409   25.80083  1.000    8.15393  C   ?  A  ?    52  1
  ATOM     435  CG2  .  VAL  A   75  ?   -5.34545  -17.04670   23.76347  1.000    7.97765  C   ?  A  ?    52  1
  ATOM     436  N    .  PRO  A   76  ?   -4.14168  -20.83506   24.39727  1.000    8.87568  N   ?  A  ?    53  1
  ATOM     437  CA   .  PRO  A   76  ?   -5.29144  -21.52971   24.98699  1.000    5.99403  C   ?  A  ?    53  1
  ATOM     438  C    .  PRO  A   76  ?   -5.02852  -22.07309   26.38753  1.000    6.64783  C   ?  A  ?    53  1
  ATOM     439  O    .  PRO  A   76  ?   -3.89100  -22.39853   26.72660  1.000    8.09303  O   ?  A  ?    53  1
  ATOM     440  CB   .  PRO  A   76  ?   -5.53129  -22.67492   24.00749  1.000    5.83740  C   ?  A  ?    53  1
  ATOM     441  CG   .  PRO  A   76  ?   -4.16548  -23.00315   23.51482  1.000    5.07675  C   ?  A  ?    53  1
  ATOM     442  CD   .  PRO  A   76  ?   -3.43723  -21.68916   23.42176  1.000    5.42859  C   ?  A  ?    53  1
  ATOM     443  N    .  THR  A   77  ?   -6.08514  -22.17806   27.19160  1.000    2.96117  N   ?  A  ?    54  1
  ATOM     444  CA   .  THR  A   77  ?   -5.96551  -22.67903   28.56055  1.000    5.69004  C   ?  A  ?    54  1
  ATOM     445  C    .  THR  A   77  ?   -6.08584  -24.20585   28.56604  1.000    8.83467  C   ?  A  ?    54  1
  ATOM     446  O    .  THR  A   77  ?   -7.08298  -24.79415   28.98993  1.000    8.90130  O   ?  A  ?    54  1
  ATOM     447  CB   .  THR  A   77  ?   -7.00507  -22.02036   29.45940  1.000    8.30287  C   ?  A  ?    54  1
  ATOM     448  CG2  .  THR  A   77  ?   -6.64723  -20.55820   29.69293  1.000    6.61496  C   ?  A  ?    54  1
  ATOM     449  OG1  .  THR  A   77  ?   -8.29697  -22.09792   28.84354  1.000   10.62059  O   ?  A  ?    54  1
  ATOM     450  N    .  VAL  A   78  ?   -5.02295  -24.84692   28.08410  1.000    6.98555  N   ?  A  ?    55  1
  ATOM     451  CA   .  VAL  A   78  ?   -4.94248  -26.30452   28.05966  1.000    9.85702  C   ?  A  ?    55  1
  ATOM     452  C    .  VAL  A   78  ?   -3.83226  -26.79722   28.99012  1.000   10.28295  C   ?  A  ?    55  1
  ATOM     453  O    .  VAL  A   78  ?   -3.10708  -25.99606   29.58116  1.000   11.13532  O   ?  A  ?    55  1
  ATOM     454  CB   .  VAL  A   78  ?   -4.73246  -26.82381   26.62926  1.000    6.76124  C   ?  A  ?    55  1
  ATOM     455  CG1  .  VAL  A   78  ?   -5.84675  -26.32897   25.72870  1.000    6.12901  C   ?  A  ?    55  1
  ATOM     456  CG2  .  VAL  A   78  ?   -3.37500  -26.39118   26.09924  1.000    6.88399  C   ?  A  ?    55  1
  HETATM   457  N    .  TPO  A   79  ?   -3.70399  -28.11784   29.10151  1.000    8.10725  N   ?  A  ?    56  1
  HETATM   458  CA   .  TPO  A   79  ?   -2.83959  -28.75564   30.10004  1.000    9.29502  C   ?  A  ?    56  1
  HETATM   459  CB   .  TPO  A   79  ?   -3.09762  -30.25098   30.13501  1.000    8.82942  C   ?  A  ?    56  1
  HETATM   460  CG2  .  TPO  A   79  ?   -2.02876  -30.98314   30.95173  1.000    9.03656  C   ?  A  ?    56  1
  HETATM   461  OG1  .  TPO  A   79  ?   -4.35402  -30.45647   30.75519  1.000    8.24961  O   ?  A  ?    56  1
  HETATM   462  P    .  TPO  A   79  ?   -5.30633  -31.10595   29.64365  1.000   16.70811  P   ?  A  ?    56  1
  HETATM   463  O1P  .  TPO  A   79  ?   -5.37600  -30.25119   28.43128  1.000   12.91064  O   ?  A  ?    56  1
  HETATM   464  O2P  .  TPO  A   79  ?   -4.72420  -32.54906   29.24082  1.000   15.87583  O   ?  A  ?    56  1
  HETATM   465  O3P  .  TPO  A   79  ?   -6.75742  -31.25981   30.30379  1.000   18.09749  O   ?  A  ?    56  1
  HETATM   466  C    .  TPO  A   79  ?   -1.35062  -28.50254   29.94220  1.000    7.43455  C   ?  A  ?    56  1
  HETATM   467  O    .  TPO  A   79  ?   -0.69344  -28.04326   30.88134  1.000    6.57074  O   ?  A  ?    56  1
  ATOM     468  N    .  ALA  A   80  ?   -0.82072  -28.82871   28.76655  1.000    8.36903  N   ?  A  ?    57  1
  ATOM     469  CA   .  ALA  A   80  ?    0.61589  -28.74024   28.53335  1.000    8.23684  C   ?  A  ?    57  1
  ATOM     470  C    .  ALA  A   80  ?    1.12408  -27.33965   28.83899  1.000    7.20757  C   ?  A  ?    57  1
  ATOM     471  O    .  ALA  A   80  ?    2.15706  -27.18156   29.48328  1.000    6.49974  O   ?  A  ?    57  1
  ATOM     472  CB   .  ALA  A   80  ?    0.95638  -29.12775   27.10747  1.000    7.76908  C   ?  A  ?    57  1
  ATOM     473  N    .  ILE  A   81  ?    0.38302  -26.32336   28.39135  1.000    4.93745  N   ?  A  ?    58  1
  ATOM     474  CA   .  ILE  A   81  ?    0.80096  -24.95062   28.64917  1.000    8.41597  C   ?  A  ?    58  1
  ATOM     475  C    .  ILE  A   81  ?    0.64658  -24.60969   30.12280  1.000    5.47891  C   ?  A  ?    58  1
  ATOM     476  O    .  ILE  A   81  ?    1.51037  -23.95034   30.71240  1.000    7.36933  O   ?  A  ?    58  1
  ATOM     477  CB   .  ILE  A   81  ?    0.01395  -23.96106   27.77878  1.000   10.62225  C   ?  A  ?    58  1
  ATOM     478  CG1  .  ILE  A   81  ?   -0.09981  -24.45603   26.34438  1.000    8.68499  C   ?  A  ?    58  1
  ATOM     479  CG2  .  ILE  A   81  ?    0.71655  -22.63597   27.79441  1.000   11.44554  C   ?  A  ?    58  1
  ATOM     480  CD1  .  ILE  A   81  ?   -0.88565  -23.51517   25.46108  1.000    7.10572  C   ?  A  ?    58  1
  ATOM     481  N    .  GLY  A   82  ?   -0.46407  -25.03059   30.73257  1.000    2.95118  N   ?  A  ?    59  1
  ATOM     482  CA   .  GLY  A   82  ?   -0.70135  -24.70644   32.13048  1.000    5.71815  C   ?  A  ?    59  1
  ATOM     483  C    .  GLY  A   82  ?    0.40949  -25.19459   33.03678  1.000    7.60989  C   ?  A  ?    59  1
  ATOM     484  O    .  GLY  A   82  ?    0.94086  -24.43849   33.85113  1.000    7.16118  O   ?  A  ?    59  1
  ATOM     485  N    .  HIS  A   83  ?    0.78037  -26.46764   32.90292  1.000    6.94762  N   ?  A  ?    60  1
  ATOM     486  CA   .  HIS  A   83  ?    1.86579  -26.99716   33.71958  1.000    6.19276  C   ?  A  ?    60  1
  ATOM     487  C    .  HIS  A   83  ?    3.19044  -26.33066   33.37271  1.000    5.35250  C   ?  A  ?    60  1
  ATOM     488  O    .  HIS  A   83  ?    3.99681  -26.04067   34.26346  1.000    5.60635  O   ?  A  ?    60  1
  ATOM     489  CB   .  HIS  A   83  ?    1.95077  -28.51438   33.55771  1.000    3.67739  C   ?  A  ?    60  1
  ATOM     490  CG   .  HIS  A   83  ?    0.84133  -29.24559   34.24409  1.000    7.59836  C   ?  A  ?    60  1
  ATOM     491  CD2  .  HIS  A   83  ?    0.78937  -29.85366   35.45243  1.000    9.32672  C   ?  A  ?    60  1
  ATOM     492  ND1  .  HIS  A   83  ?   -0.41631  -29.37445   33.69559  1.000    7.33789  N   ?  A  ?    60  1
  ATOM     493  CE1  .  HIS  A   83  ?   -1.19085  -30.04496   34.52940  1.000    6.20427  C   ?  A  ?    60  1
  ATOM     494  NE2  .  HIS  A   83  ?   -0.48318  -30.34628   35.60320  1.000    9.55837  N   ?  A  ?    60  1
  ATOM     495  N    .  THR  A   84  ?    3.42402  -26.05867   32.08825  1.000    7.19283  N   ?  A  ?    61  1
  ATOM     496  C    .  THR  A   84  ?    4.70898  -23.97019   32.28153  1.000    4.35637  C   ?  A  ?    61  1
  ATOM     497  O    .  THR  A   84  ?    5.73141  -23.56383   32.84198  1.000    6.43007  O   ?  A  ?    61  1
  ATOM     498  CA   .  THR  A   84  ?    4.65019  -25.37424   31.69355  1.000    5.43409  C   ?  A  ?    61  1
  ATOM     499  CB   .  THR  A   84  ?    4.75852  -25.32026   30.16951  1.000    4.91659  C   ?  A  ?    61  1
  ATOM     500  OG1  .  THR  A   84  ?    4.75981  -26.65273   29.64294  1.000    5.97277  O   ?  A  ?    61  1
  ATOM     501  CG2  .  THR  A   84  ?    6.03804  -24.60642   29.74939  1.000    6.95398  C   ?  A  ?    61  1
  ATOM     502  N    .  SER  A   85  ?    3.61327  -23.21620   32.17770  1.000    6.13373  N   ?  A  ?    62  1
  ATOM     503  CA   .  SER  A   85  ?    3.64569  -21.82717   32.62550  1.000    5.60621  C   ?  A  ?    62  1
  ATOM     504  C    .  SER  A   85  ?    3.66574  -21.71315   34.14358  1.000    3.78630  C   ?  A  ?    62  1
  ATOM     505  O    .  SER  A   85  ?    4.23018  -20.75348   34.67711  1.000    4.88699  O   ?  A  ?    62  1
  ATOM     506  CB   .  SER  A   85  ?    2.46213  -21.06228   32.04178  1.000    3.04023  C   ?  A  ?    62  1
  ATOM     507  OG   .  SER  A   85  ?    2.62973  -20.89221   30.64403  1.000    6.87920  O   ?  A  ?    62  1
  ATOM     508  N    .  ILE  A   86  ?    3.06427  -22.66826   34.85605  1.000    3.17352  N   ?  A  ?    63  1
  ATOM     509  CA   .  ILE  A   86  ?    3.15210  -22.65190   36.31541  1.000    3.60851  C   ?  A  ?    63  1
  ATOM     510  C    .  ILE  A   86  ?    4.60597  -22.74859   36.75795  1.000    6.85047  C   ?  A  ?    63  1
  ATOM     511  O    .  ILE  A   86  ?    5.03947  -22.04742   37.68069  1.000    8.10602  O   ?  A  ?    63  1
  ATOM     512  CB   .  ILE  A   86  ?    2.30585  -23.78392   36.92931  1.000    2.99337  C   ?  A  ?    63  1
  ATOM     513  CG1  .  ILE  A   86  ?    0.81063  -23.50648   36.75819  1.000    3.20590  C   ?  A  ?    63  1
  ATOM     514  CG2  .  ILE  A   86  ?    2.62426  -23.94602   38.40948  1.000    2.95198  C   ?  A  ?    63  1
  ATOM     515  CD1  .  ILE  A   86  ?   -0.07069  -24.66767   37.17442  1.000    7.00259  C   ?  A  ?    63  1
  ATOM     516  N    .  PHE  A   87  ?    5.38795  -23.59730   36.09237  1.000    6.80555  N   ?  A  ?    64  1
  ATOM     517  CA   .  PHE  A   87  ?    6.73757  -23.91066   36.54090  1.000    8.51111  C   ?  A  ?    64  1
  ATOM     518  C    .  PHE  A   87  ?    7.82966  -23.13759   35.80976  1.000    8.66223  C   ?  A  ?    64  1
  ATOM     519  O    .  PHE  A   87  ?    8.98004  -23.16346   36.25708  1.000    8.85968  O   ?  A  ?    64  1
  ATOM     520  CB   .  PHE  A   87  ?    6.97957  -25.42078   36.42423  1.000    4.17488  C   ?  A  ?    64  1
  ATOM     521  CG   .  PHE  A   87  ?    6.20888  -26.21577   37.43412  1.000    2.94653  C   ?  A  ?    64  1
  ATOM     522  CD1  .  PHE  A   87  ?    6.77552  -26.53620   38.65553  1.000    7.85295  C   ?  A  ?    64  1
  ATOM     523  CD2  .  PHE  A   87  ?    4.90202  -26.59820   37.18580  1.000    5.74073  C   ?  A  ?    64  1
  ATOM     524  CE1  .  PHE  A   87  ?    6.06134  -27.24902   39.60292  1.000    2.95909  C   ?  A  ?    64  1
  ATOM     525  CE2  .  PHE  A   87  ?    4.17882  -27.31118   38.12895  1.000    4.05738  C   ?  A  ?    64  1
  ATOM     526  CZ   .  PHE  A   87  ?    4.76181  -27.63567   39.33923  1.000    4.84410  C   ?  A  ?    64  1
  ATOM     527  O    .  THR  A   88  ?    9.10435  -19.25970   34.12769  1.000    6.10478  O   ?  A  ?    65  1
  ATOM     528  N    .  THR  A   88  ?    7.50682  -22.44384   34.71592  1.000    9.82177  N   ?  A  ?    65  1
  ATOM     529  CA   .  THR  A   88  ?    8.46481  -21.55318   34.07074  1.000    7.69602  C   ?  A  ?    65  1
  ATOM     530  C    .  THR  A   88  ?    8.21207  -20.08133   34.36388  1.000    6.07572  C   ?  A  ?    65  1
  ATOM     531  CB   .  THR  A   88  ?    8.45389  -21.73517   32.54599  1.000    5.29097  C   ?  A  ?    65  1
  ATOM     532  OG1  .  THR  A   88  ?    7.16334  -21.38284   32.03127  1.000    4.78393  O   ?  A  ?    65  1
  ATOM     533  CG2  .  THR  A   88  ?    8.78357  -23.16139   32.16192  1.000    7.36149  C   ?  A  ?    65  1
  ATOM     534  O    .  GLY  A   89  ?    6.68332  -16.38918   33.59417  1.000    6.10298  O   ?  A  ?    66  1
  ATOM     535  N    .  GLY  A   89  ?    7.02960  -19.72771   34.86249  1.000    2.90213  N   ?  A  ?    66  1
  ATOM     536  CA   .  GLY  A   89  ?    6.66701  -18.32879   34.96664  1.000    2.89751  C   ?  A  ?    66  1
  ATOM     537  C    .  GLY  A   89  ?    6.62050  -17.61953   33.63610  1.000    3.80336  C   ?  A  ?    66  1
  ATOM     538  N    .  SER  A   90  ?    6.50174  -18.36548   32.54372  1.000    3.80264  N   ?  A  ?    67  1
  ATOM     539  CA   .  SER  A   90  ?    6.60807  -17.83588   31.19311  1.000    6.39549  C   ?  A  ?    67  1
  ATOM     540  C    .  SER  A   90  ?    5.32318  -18.11301   30.41749  1.000    6.20476  C   ?  A  ?    67  1
  ATOM     541  O    .  SER  A   90  ?    4.35825  -18.67708   30.93940  1.000    6.49187  O   ?  A  ?    67  1
  ATOM     542  CB   .  SER  A   90  ?    7.81880  -18.43801   30.47497  1.000    6.59281  C   ?  A  ?    67  1
  ATOM     543  OG   .  SER  A   90  ?    8.15240  -17.69517   29.31881  1.000    5.96090  O   ?  A  ?    67  1
  ATOM     544  N    .  VAL  A   91  ?    5.32935  -17.70859   29.15137  1.000    5.61712  N   ?  A  ?    68  1
  ATOM     545  CA   .  VAL  A   91  ?    4.15663  -17.81181   28.28403  1.000    8.03138  C   ?  A  ?    68  1
  ATOM     546  C    .  VAL  A   91  ?    4.55668  -18.55075   27.01622  1.000    8.41861  C   ?  A  ?    68  1
  ATOM     547  O    .  VAL  A   91  ?    5.74814  -18.61222   26.66787  1.000    7.82321  O   ?  A  ?    68  1
  ATOM     548  CB   .  VAL  A   91  ?    3.56795  -16.41789   27.95698  1.000    5.10735  C   ?  A  ?    68  1
  ATOM     549  CG1  .  VAL  A   91  ?    2.98335  -15.78122   29.20727  1.000    4.20246  C   ?  A  ?    68  1
  ATOM     550  CG2  .  VAL  A   91  ?    4.62734  -15.52900   27.33270  1.000    2.87224  C   ?  A  ?    68  1
  ATOM     551  N    .  PRO  A   92  ?    3.58045  -19.12921   26.29780  1.000    6.41342  N   ?  A  ?    69  1
  ATOM     552  CA   .  PRO  A   92  ?    3.90487  -19.90751   25.08639  1.000    4.68278  C   ?  A  ?    69  1
  ATOM     553  C    .  PRO  A   92  ?    4.75179  -19.17128   24.07111  1.000    4.76552  C   ?  A  ?    69  1
  ATOM     554  O    .  PRO  A   92  ?    5.56255  -19.80172   23.38144  1.000    3.46978  O   ?  A  ?    69  1
  ATOM     555  CB   .  PRO  A   92  ?    2.52604  -20.23203   24.49950  1.000    7.73515  C   ?  A  ?    69  1
  ATOM     556  CG   .  PRO  A   92  ?    1.60472  -20.17761   25.63213  1.000    8.37439  C   ?  A  ?    69  1
  ATOM     557  CD   .  PRO  A   92  ?    2.14008  -19.17911   26.61123  1.000    5.55695  C   ?  A  ?    69  1
  ATOM     558  N    .  SER  A   93  ?    4.57250  -17.85554   23.94108  1.000    4.83780  N   ?  A  ?    70  1
  ATOM     559  CA   .  SER  A   93  ?    5.37708  -17.08226   23.00403  1.000    4.30334  C   ?  A  ?    70  1
  ATOM     560  C    .  SER  A   93  ?    6.86413  -17.28091   23.25493  1.000    5.28398  C   ?  A  ?    70  1
  ATOM     561  O    .  SER  A   93  ?    7.66473  -17.25938   22.31343  1.000    6.09124  O   ?  A  ?    70  1
  ATOM     562  CB   .  SER  A   93  ?    5.00789  -15.60145   23.10982  1.000    5.19843  C   ?  A  ?    70  1
  ATOM     563  OG   .  SER  A   93  ?    5.65919  -14.83036   22.11741  1.000    7.87196  O   ?  A  ?    70  1
  ATOM     564  N    .  ILE  A   94  ?    7.24410  -17.50968   24.50691  1.000    2.86042  N   ?  A  ?    71  1
  ATOM     565  CA   .  ILE  A   94  ?    8.64239  -17.60542   24.90515  1.000    9.83003  C   ?  A  ?    71  1
  ATOM     566  C    .  ILE  A   94  ?    9.07228  -19.04969   25.13720  1.000    8.85482  C   ?  A  ?    71  1
  ATOM     567  O    .  ILE  A   94  ?   10.08790  -19.49149   24.59907  1.000    4.82795  O   ?  A  ?    71  1
  ATOM     568  CB   .  ILE  A   94  ?    8.89488  -16.73904   26.15848  1.000    2.85362  C   ?  A  ?    71  1
  ATOM     569  CG1  .  ILE  A   94  ?    8.66085  -15.26546   25.83075  1.000    2.84667  C   ?  A  ?    71  1
  ATOM     570  CG2  .  ILE  A   94  ?   10.29911  -16.96896   26.68897  1.000    2.85019  C   ?  A  ?    71  1
  ATOM     571  CD1  .  ILE  A   94  ?    8.49619  -14.39125   27.04760  1.000    7.85676  C   ?  A  ?    71  1
  ATOM     572  N    .  HIS  A   95  ?    8.31633  -19.80892   25.93960  1.000    6.24907  N   ?  A  ?    72  1
  ATOM     573  CA   .  HIS  A   95  ?    8.80863  -21.12145   26.34695  1.000    7.31946  C   ?  A  ?    72  1
  ATOM     574  C    .  HIS  A   95  ?    8.53067  -22.22006   25.32507  1.000    4.06214  C   ?  A  ?    72  1
  ATOM     575  O    .  HIS  A   95  ?    9.05116  -23.32938   25.48195  1.000    7.04785  O   ?  A  ?    72  1
  ATOM     576  CB   .  HIS  A   95  ?    8.25821  -21.51121   27.73335  1.000    2.88559  C   ?  A  ?    72  1
  ATOM     577  CG   .  HIS  A   95  ?    6.76751  -21.67227   27.80546  1.000    6.14891  C   ?  A  ?    72  1
  ATOM     578  ND1  .  HIS  A   95  ?    6.03705  -22.36921   26.86683  1.000    6.79375  N   ?  A  ?    72  1
  ATOM     579  CD2  .  HIS  A   95  ?    5.87721  -21.26108   28.74058  1.000    7.12309  C   ?  A  ?    72  1
  ATOM     580  CE1  .  HIS  A   95  ?    4.76135  -22.36415   27.20944  1.000    6.56377  C   ?  A  ?    72  1
  ATOM     581  NE2  .  HIS  A   95  ?    4.63703  -21.69574   28.34170  1.000    5.97538  N   ?  A  ?    72  1
  ATOM     582  N    .  GLY  A   96  ?    7.74086  -21.94699   24.28665  1.000    2.88113  N   ?  A  ?    73  1
  ATOM     583  CA   .  GLY  A   96  ?    7.64705  -22.83371   23.14534  1.000    9.29254  C   ?  A  ?    73  1
  ATOM     584  C    .  GLY  A   96  ?    6.59297  -23.91904   23.22040  1.000   10.03267  C   ?  A  ?    73  1
  ATOM     585  O    .  GLY  A   96  ?    6.34930  -24.58884   22.20804  1.000   11.17752  O   ?  A  ?    73  1
  ATOM     586  N    .  ILE  A   97  ?    5.96125  -24.12694   24.37289  1.000    8.74216  N   ?  A  ?    74  1
  ATOM     587  CA   .  ILE  A   97  ?    4.89572  -25.11736   24.49920  1.000    8.03403  C   ?  A  ?    74  1
  ATOM     588  C    .  ILE  A   97  ?    3.59244  -24.41323   24.13446  1.000    5.18392  C   ?  A  ?    74  1
  ATOM     589  O    .  ILE  A   97  ?    2.96448  -23.76133   24.97011  1.000    2.91417  O   ?  A  ?    74  1
  ATOM     590  CB   .  ILE  A   97  ?    4.84307  -25.73003   25.89986  1.000    2.91900  C   ?  A  ?    74  1
  ATOM     591  CG1  .  ILE  A   97  ?    6.19980  -26.33504   26.27197  1.000    3.97931  C   ?  A  ?    74  1
  ATOM     592  CG2  .  ILE  A   97  ?    3.74659  -26.78984   25.97375  1.000    2.93005  C   ?  A  ?    74  1
  ATOM     593  CD1  .  ILE  A   97  ?    6.69061  -27.38580   25.29695  1.000    4.49904  C   ?  A  ?    74  1
  ATOM     594  N    .  ALA  A   98  ?    3.18414  -24.54720   22.87423  1.000    7.16145  N   ?  A  ?    75  1
  ATOM     595  CA   .  ALA  A   98  ?    2.03978  -23.82596   22.33945  1.000    9.36854  C   ?  A  ?    75  1
  ATOM     596  C    .  ALA  A   98  ?    0.73627  -24.61513   22.43526  1.000   10.37983  C   ?  A  ?    75  1
  ATOM     597  O    .  ALA  A   98  ?   -0.23172  -24.27517   21.74722  1.000   12.96923  O   ?  A  ?    75  1
  ATOM     598  CB   .  ALA  A   98  ?    2.30884  -23.42696   20.88720  1.000    2.90644  C   ?  A  ?    75  1
  ATOM     599  N    .  GLY  A   99  ?    0.68458  -25.63624   23.27177  1.000    6.48660  N   ?  A  ?    76  1
  ATOM     600  CA   .  GLY  A   99  ?   -0.51431  -26.43886   23.43197  1.000    6.15812  C   ?  A  ?    76  1
  ATOM     601  C    .  GLY  A   99  ?   -0.15151  -27.87916   23.71524  1.000    7.28347  C   ?  A  ?    76  1
  ATOM     602  O    .  GLY  A   99  ?    1.01511  -28.26071   23.72901  1.000   10.68376  O   ?  A  ?    76  1
  ATOM     603  N    .  ASN  A  100  ?   -1.18707  -28.68722   23.96654  1.000    6.11218  N   ?  A  ?    77  1
  ATOM     604  CA   .  ASN  A  100  ?   -0.97584  -30.13033   24.03885  1.000    7.57192  C   ?  A  ?    77  1
  ATOM     605  C    .  ASN  A  100  ?   -0.45327  -30.65499   22.71192  1.000    6.53320  C   ?  A  ?    77  1
  ATOM     606  O    .  ASN  A  100  ?    0.38537  -31.56288   22.67402  1.000    4.35302  O   ?  A  ?    77  1
  ATOM     607  CB   .  ASN  A  100  ?   -2.27350  -30.84667   24.41355  1.000    6.00741  C   ?  A  ?    77  1
  ATOM     608  CG   .  ASN  A  100  ?   -2.76183  -30.48632   25.79765  1.000    7.77542  C   ?  A  ?    77  1
  ATOM     609  ND2  .  ASN  A  100  ?   -4.06607  -30.59406   26.01503  1.000    7.99974  N   ?  A  ?    77  1
  ATOM     610  OD1  .  ASN  A  100  ?   -1.97484  -30.12938   26.66597  1.000    7.37160  O   ?  A  ?    77  1
  ATOM     611  N    .  ASP  A  101  ?   -0.94582  -30.08831   21.61629  1.000    5.22966  N   ?  A  ?    78  1
  ATOM     612  CA   .  ASP  A  101  ?   -0.45387  -30.33942   20.27524  1.000    8.69644  C   ?  A  ?    78  1
  ATOM     613  C    .  ASP  A  101  ?   -0.35027  -29.01002   19.54572  1.000   10.19661  C   ?  A  ?    78  1
  ATOM     614  O    .  ASP  A  101  ?   -0.98956  -28.02286   19.91663  1.000    9.92923  O   ?  A  ?    78  1
  ATOM     615  CB   .  ASP  A  101  ?   -1.37501  -31.28043   19.48414  1.000   11.40459  C   ?  A  ?    78  1
  ATOM     616  CG   .  ASP  A  101  ?   -1.56544  -32.61650   20.15725  1.000   13.66599  C   ?  A  ?    78  1
  ATOM     617  OD1  .  ASP  A  101  ?   -0.81906  -33.55693   19.82107  1.000   15.23663  O   ?  A  ?    78  1
  ATOM     618  OD2  .  ASP  A  101  ?   -2.46599  -32.73037   21.01421  1.000   13.86799  O   ?  A  ?    78  1
  ATOM     619  N    .  TRP  A  102  ?    0.46662  -28.99380   18.49860  1.000   10.27141  N   ?  A  ?    79  1
  ATOM     620  CA   .  TRP  A  102  ?    0.52721  -27.85010   17.60399  1.000    8.73252  C   ?  A  ?    79  1
  ATOM     621  C    .  TRP  A  102  ?    0.95886  -28.34298   16.23822  1.000    3.56917  C   ?  A  ?    79  1
  ATOM     622  O    .  TRP  A  102  ?    1.52850  -29.42711   16.10032  1.000   12.45161  O   ?  A  ?    79  1
  ATOM     623  CB   .  TRP  A  102  ?    1.48324  -26.76124   18.10567  1.000    8.10211  C   ?  A  ?    79  1
  ATOM     624  CG   .  TRP  A  102  ?    2.89049  -27.22711   18.32217  1.000    6.71471  C   ?  A  ?    79  1
  ATOM     625  CD1  .  TRP  A  102  ?    3.87983  -27.32902   17.38538  1.000    4.27965  C   ?  A  ?    79  1
  ATOM     626  CD2  .  TRP  A  102  ?    3.46957  -27.63590   19.56349  1.000    7.89901  C   ?  A  ?    79  1
  ATOM     627  CE2  .  TRP  A  102  ?    4.81263  -27.97717   19.30644  1.000    6.21351  C   ?  A  ?    79  1
  ATOM     628  CE3  .  TRP  A  102  ?    2.98068  -27.75058   20.86923  1.000    5.42983  C   ?  A  ?    79  1
  ATOM     629  NE1  .  TRP  A  102  ?    5.03789  -27.78271   17.96866  1.000    8.56651  N   ?  A  ?    79  1
  ATOM     630  CZ2  .  TRP  A  102  ?    5.67121  -28.42526   20.30575  1.000   10.48841  C   ?  A  ?    79  1
  ATOM     631  CZ3  .  TRP  A  102  ?    3.83297  -28.19243   21.85768  1.000    6.21134  C   ?  A  ?    79  1
  ATOM     632  CH2  .  TRP  A  102  ?    5.16456  -28.52193   21.57289  1.000    3.54662  C   ?  A  ?    79  1
  ATOM     633  N    .  TYR  A  103  ?    0.67124  -27.53972   15.22650  1.000    4.49194  N   ?  A  ?    80  1
  ATOM     634  CA   .  TYR  A  103  ?    1.09829  -27.85013   13.87388  1.000    5.79752  C   ?  A  ?    80  1
  ATOM     635  C    .  TYR  A  103  ?    2.47270  -27.23627   13.64244  1.000    9.95739  C   ?  A  ?    80  1
  ATOM     636  O    .  TYR  A  103  ?    2.65404  -26.02281   13.79850  1.000    9.09461  O   ?  A  ?    80  1
  ATOM     637  CB   .  TYR  A  103  ?    0.09147  -27.33758   12.84934  1.000    5.67330  C   ?  A  ?    80  1
  ATOM     638  CG   .  TYR  A  103  ?    0.48105  -27.68232   11.43736  1.000    3.60143  C   ?  A  ?    80  1
  ATOM     639  CD1  .  TYR  A  103  ?    1.12344  -26.75637   10.63409  1.000    8.58355  C   ?  A  ?    80  1
  ATOM     640  CD2  .  TYR  A  103  ?    0.23260  -28.94299   10.91697  1.000   10.39342  C   ?  A  ?    80  1
  ATOM     641  CE1  .  TYR  A  103  ?    1.49314  -27.06520    9.34741  1.000   10.97953  C   ?  A  ?    80  1
  ATOM     642  CE2  .  TYR  A  103  ?    0.60039  -29.26353    9.62780  1.000   10.87893  C   ?  A  ?    80  1
  ATOM     643  CZ   .  TYR  A  103  ?    1.23020  -28.31947    8.84727  1.000   14.46589  C   ?  A  ?    80  1
  ATOM     644  OH   .  TYR  A  103  ?    1.60211  -28.62924    7.55936  1.000   18.90167  O   ?  A  ?    80  1
  ATOM     645  N    .  ASP  A  104  ?    3.43830  -28.07580   13.28740  1.000    9.23432  N   ?  A  ?    81  1
  ATOM     646  CA   .  ASP  A  104  ?    4.79646  -27.63726   12.99749  1.000    9.35548  C   ?  A  ?    81  1
  ATOM     647  C    .  ASP  A  104  ?    4.95020  -27.60656   11.48274  1.000    9.82538  C   ?  A  ?    81  1
  ATOM     648  O    .  ASP  A  104  ?    4.96584  -28.65638   10.83475  1.000    7.85090  O   ?  A  ?    81  1
  ATOM     649  CB   .  ASP  A  104  ?    5.81285  -28.56774   13.65556  1.000   11.32904  C   ?  A  ?    81  1
  ATOM     650  CG   .  ASP  A  104  ?    7.23793  -28.07203   13.51819  1.000   13.82102  C   ?  A  ?    81  1
  ATOM     651  OD1  .  ASP  A  104  ?    7.62303  -27.64526   12.41170  1.000   11.12050  O   ?  A  ?    81  1
  ATOM     652  OD2  .  ASP  A  104  ?    7.97682  -28.10564   14.52697  1.000   16.82786  O   ?  A  ?    81  1
  ATOM     653  N    .  LYS  A  105  ?    5.06375  -26.40229   10.91860  1.000   11.69583  N   ?  A  ?    82  1
  ATOM     654  CA   .  LYS  A  105  ?    5.05419  -26.27565    9.46654  1.000   16.87220  C   ?  A  ?    82  1
  ATOM     655  C    .  LYS  A  105  ?    6.34175  -26.78101    8.82420  1.000   16.13832  C   ?  A  ?    82  1
  ATOM     656  O    .  LYS  A  105  ?    6.33018  -27.12412    7.63751  1.000   15.37344  O   ?  A  ?    82  1
  ATOM     657  CB   .  LYS  A  105  ?    4.78803  -24.82244    9.06538  1.000   22.47916  C   ?  A  ?    82  1
  ATOM     658  CG   .  LYS  A  105  ?    6.02360  -24.02220    8.70438  1.000   29.53876  C   ?  A  ?    82  1
  ATOM     659  CD   .  LYS  A  105  ?    5.64875  -22.65122    8.16600  1.000   34.96964  C   ?  A  ?    82  1
  ATOM     660  CE   .  LYS  A  105  ?    6.06041  -21.54783    9.12296  1.000   37.14529  C   ?  A  ?    82  1
  ATOM     661  NZ   .  LYS  A  105  ?    4.89899  -20.93877    9.83376  1.000   37.70784  N   ?  A  ?    82  1
  ATOM     662  N    A  GLU  A  106  ?    7.44630  -26.83642    9.57247  0.490   17.35425  N   ?  A  ?    83  1
  ATOM     663  CA   A  GLU  A  106  ?    8.68018  -27.38544    9.02180  0.490   19.43038  C   ?  A  ?    83  1
  ATOM     664  C    A  GLU  A  106  ?    8.66583  -28.90839    9.02083  0.490   18.68743  C   ?  A  ?    83  1
  ATOM     665  O    A  GLU  A  106  ?    9.24330  -29.52944    8.12132  0.490   18.19400  O   ?  A  ?    83  1
  ATOM     666  CB   A  GLU  A  106  ?    9.89010  -26.85994    9.79932  0.490   22.10237  C   ?  A  ?    83  1
  ATOM     667  CG   A  GLU  A  106  ?   10.13721  -25.36110    9.64004  0.490   24.88929  C   ?  A  ?    83  1
  ATOM     668  CD   A  GLU  A  106  ?    9.25452  -24.51530   10.53989  0.490   26.94185  C   ?  A  ?    83  1
  ATOM     669  OE1  A  GLU  A  106  ?    8.56081  -25.08938   11.40546  0.490   28.81705  O   ?  A  ?    83  1
  ATOM     670  OE2  A  GLU  A  106  ?    9.25696  -23.27510   10.38548  0.490   28.57077  O   ?  A  ?    83  1
  ATOM     671  N    B  GLU  A  106  ?    7.44505  -26.84034    9.57311  0.510   17.32774  N   ?  A  ?    83  1
  ATOM     672  CA   B  GLU  A  106  ?    8.67526  -27.39082    9.01759  0.510   19.43654  C   ?  A  ?    83  1
  ATOM     673  C    B  GLU  A  106  ?    8.65418  -28.91188    9.01261  0.510   18.69495  C   ?  A  ?    83  1
  ATOM     674  O    B  GLU  A  106  ?    9.21428  -29.53431    8.10321  0.510   18.17193  O   ?  A  ?    83  1
  ATOM     675  CB   B  GLU  A  106  ?    9.88573  -26.87477    9.79793  0.510   22.09524  C   ?  A  ?    83  1
  ATOM     676  CG   B  GLU  A  106  ?    9.87706  -25.36967   10.04451  0.510   25.24515  C   ?  A  ?    83  1
  ATOM     677  CD   B  GLU  A  106  ?   10.10422  -24.54413    8.78593  0.510   26.54355  C   ?  A  ?    83  1
  ATOM     678  OE1  B  GLU  A  106  ?   10.21356  -25.12108    7.68204  0.510   25.94953  O   ?  A  ?    83  1
  ATOM     679  OE2  B  GLU  A  106  ?   10.18073  -23.30352    8.90661  0.510   28.74726  O   ?  A  ?    83  1
  ATOM     680  N    .  LEU  A  107  ?    8.00940  -29.52162   10.00744  1.000   17.72286  N   ?  A  ?    84  1
  ATOM     681  CA   .  LEU  A  107  ?    7.81331  -30.96342   10.00726  1.000   16.67038  C   ?  A  ?    84  1
  ATOM     682  C    .  LEU  A  107  ?    6.63205  -31.37626    9.14303  1.000   15.90737  C   ?  A  ?    84  1
  ATOM     683  O    .  LEU  A  107  ?    6.53315  -32.54990    8.76959  1.000   16.48381  O   ?  A  ?    84  1
  ATOM     684  CB   .  LEU  A  107  ?    7.60238  -31.47082   11.43468  1.000   19.78010  C   ?  A  ?    84  1
  ATOM     685  CG   .  LEU  A  107  ?    8.74848  -31.25318   12.42252  1.000   21.91595  C   ?  A  ?    84  1
  ATOM     686  CD1  .  LEU  A  107  ?    8.38758  -31.80243   13.79166  1.000   22.51849  C   ?  A  ?    84  1
  ATOM     687  CD2  .  LEU  A  107  ?   10.01070  -31.90589   11.90354  1.000   23.22164  C   ?  A  ?    84  1
  ATOM     688  O    .  GLY  A  108  ?    2.83076  -32.29111    7.89851  1.000   12.41044  O   ?  A  ?    85  1
  ATOM     689  N    .  GLY  A  108  ?    5.73971  -30.43907    8.82829  1.000   14.46682  N   ?  A  ?    85  1
  ATOM     690  CA   .  GLY  A  108  ?    4.60507  -30.71261    7.96917  1.000   12.79800  C   ?  A  ?    85  1
  ATOM     691  C    .  GLY  A  108  ?    3.51718  -31.54616    8.60420  1.000   13.89238  C   ?  A  ?    85  1
  ATOM     692  N    .  LYS  A  109  ?    3.32822  -31.43387    9.91672  1.000    9.33570  N   ?  A  ?    86  1
  ATOM     693  CA   .  LYS  A  109  ?    2.39245  -32.30315   10.61688  1.000   10.63784  C   ?  A  ?    86  1
  ATOM     694  C    .  LYS  A  109  ?    2.16838  -31.76675   12.02234  1.000    9.63112  C   ?  A  ?    86  1
  ATOM     695  O    .  LYS  A  109  ?    2.90941  -30.90879   12.50539  1.000   12.34372  O   ?  A  ?    86  1
  ATOM     696  CB   .  LYS  A  109  ?    2.91681  -33.73792   10.68069  1.000   14.40302  C   ?  A  ?    86  1
  ATOM     697  CG   .  LYS  A  109  ?    4.19156  -33.86526   11.49371  1.000   18.53587  C   ?  A  ?    86  1
  ATOM     698  CD   .  LYS  A  109  ?    4.33647  -35.26228   12.05628  1.000   25.64973  C   ?  A  ?    86  1
  ATOM     699  CE   .  LYS  A  109  ?    5.52024  -35.97849   11.44847  1.000   30.40070  C   ?  A  ?    86  1
  ATOM     700  NZ   .  LYS  A  109  ?    6.78558  -35.27382   11.78591  1.000   32.95031  N   ?  A  ?    86  1
  ATOM     701  N    A  SER  A  110  ?    1.13550  -32.29442   12.67204  0.790    9.02547  N   ?  A  ?    87  1
  ATOM     702  CA   A  SER  A  110  ?    0.87725  -31.97739   14.06772  0.790    8.75558  C   ?  A  ?    87  1
  ATOM     703  C    A  SER  A  110  ?    1.88351  -32.68706   14.96970  0.790    9.64001  C   ?  A  ?    87  1
  ATOM     704  O    A  SER  A  110  ?    2.34088  -33.79521   14.67761  0.790   10.27323  O   ?  A  ?    87  1
  ATOM     705  CB   A  SER  A  110  ?   -0.54902  -32.37872   14.44094  0.790    9.25083  C   ?  A  ?    87  1
  ATOM     706  OG   A  SER  A  110  ?   -0.78159  -32.23873   15.82913  0.790   11.99539  O   ?  A  ?    87  1
  ATOM     707  N    B  SER  A  110  ?    1.12959  -32.28637   12.67172  0.210    8.95012  N   ?  A  ?    87  1
  ATOM     708  CA   B  SER  A  110  ?    0.89593  -31.96748   14.07144  0.210    8.96950  C   ?  A  ?    87  1
  ATOM     709  C    B  SER  A  110  ?    1.92798  -32.66008   14.94815  0.210    9.26885  C   ?  A  ?    87  1
  ATOM     710  O    B  SER  A  110  ?    2.43744  -33.73517   14.62177  0.210    9.69692  O   ?  A  ?    87  1
  ATOM     711  CB   B  SER  A  110  ?   -0.50618  -32.38964   14.50428  0.210    9.52182  C   ?  A  ?    87  1
  ATOM     712  OG   B  SER  A  110  ?   -1.49090  -31.78504   13.69121  0.210    9.92479  O   ?  A  ?    87  1
  ATOM     713  N    .  VAL  A  111  ?    2.21801  -32.03824   16.08411  1.000    7.15517  N   ?  A  ?    88  1
  ATOM     714  CA   .  VAL  A  111  ?    3.26595  -32.49102   16.98707  1.000   10.60605  C   ?  A  ?    88  1
  ATOM     715  C    .  VAL  A  111  ?    2.69632  -32.55725   18.39614  1.000   11.34029  C   ?  A  ?    88  1
  ATOM     716  O    .  VAL  A  111  ?    2.02914  -31.61790   18.83947  1.000   10.85662  O   ?  A  ?    88  1
  ATOM     717  CB   .  VAL  A  111  ?    4.47933  -31.54314   16.92613  1.000   10.27798  C   ?  A  ?    88  1
  ATOM     718  CG1  .  VAL  A  111  ?    5.40292  -31.76002   18.10451  1.000   12.83918  C   ?  A  ?    88  1
  ATOM     719  CG2  .  VAL  A  111  ?    5.22156  -31.72423   15.60730  1.000   11.86161  C   ?  A  ?    88  1
  ATOM     720  N    .  TYR  A  112  ?    2.94559  -33.66501   19.09364  1.000   11.16924  N   ?  A  ?    89  1
  ATOM     721  CA   .  TYR  A  112  ?    2.55924  -33.78304   20.49252  1.000    8.44050  C   ?  A  ?    89  1
  ATOM     722  C    .  TYR  A  112  ?    3.63151  -33.15940   21.37516  1.000    7.61182  C   ?  A  ?    89  1
  ATOM     723  O    .  TYR  A  112  ?    4.82816  -33.28105   21.09775  1.000    6.52099  O   ?  A  ?    89  1
  ATOM     724  CB   .  TYR  A  112  ?    2.33584  -35.24201   20.88865  1.000    6.55275  C   ?  A  ?    89  1
  ATOM     725  CG   .  TYR  A  112  ?    1.81661  -35.40405   22.30083  1.000    8.35355  C   ?  A  ?    89  1
  ATOM     726  CD1  .  TYR  A  112  ?    0.57818  -34.89132   22.66832  1.000    9.28968  C   ?  A  ?    89  1
  ATOM     727  CD2  .  TYR  A  112  ?    2.56219  -36.07035   23.26413  1.000    6.65350  C   ?  A  ?    89  1
  ATOM     728  CE1  .  TYR  A  112  ?    0.09901  -35.03551   23.95799  1.000   11.39244  C   ?  A  ?    89  1
  ATOM     729  CE2  .  TYR  A  112  ?    2.09190  -36.22129   24.55405  1.000    6.55347  C   ?  A  ?    89  1
  ATOM     730  CZ   .  TYR  A  112  ?    0.86118  -35.70331   24.89691  1.000   12.99531  C   ?  A  ?    89  1
  ATOM     731  OH   .  TYR  A  112  ?    0.39566  -35.85732   26.18356  1.000   15.29945  O   ?  A  ?    89  1
  ATOM     732  N    .  CYS  A  113  ?    3.18729  -32.51913   22.46036  1.000    6.06857  N   ?  A  ?    90  1
  ATOM     733  CA   .  CYS  A  113  ?    4.05282  -31.61322   23.21114  1.000    8.31027  C   ?  A  ?    90  1
  ATOM     734  C    .  CYS  A  113  ?    5.30732  -32.30625   23.73886  1.000   12.46362  C   ?  A  ?    90  1
  ATOM     735  O    .  CYS  A  113  ?    6.38772  -31.70536   23.75703  1.000   14.63504  O   ?  A  ?    90  1
  ATOM     736  CB   .  CYS  A  113  ?    3.26431  -30.98035   24.35506  1.000    6.37445  C   ?  A  ?    90  1
  ATOM     737  SG   .  CYS  A  113  ?    2.44219  -32.17302   25.42276  1.000    7.71056  S   ?  A  ?    90  1
  ATOM     738  N    .  THR  A  114  ?    5.19579  -33.56395   24.17306  1.000   10.18662  N   ?  A  ?    91  1
  ATOM     739  CA   .  THR  A  114  ?    6.33461  -34.25796   24.76493  1.000    9.30677  C   ?  A  ?    91  1
  ATOM     740  C    .  THR  A  114  ?    6.90181  -35.37746   23.90464  1.000    8.78786  C   ?  A  ?    91  1
  ATOM     741  O    .  THR  A  114  ?    7.92241  -35.95952   24.28602  1.000    7.64865  O   ?  A  ?    91  1
  ATOM     742  CB   .  THR  A  114  ?    5.96727  -34.84314   26.13922  1.000    4.75939  C   ?  A  ?    91  1
  ATOM     743  OG1  .  THR  A  114  ?    4.75061  -35.59222   26.03715  1.000    4.71991  O   ?  A  ?    91  1
  ATOM     744  CG2  .  THR  A  114  ?    5.81431  -33.74105   27.17319  1.000    9.80788  C   ?  A  ?    91  1
  ATOM     745  N    .  SER  A  115  ?    6.28349  -35.69138   22.76786  1.000    8.42114  N   ?  A  ?    92  1
  ATOM     746  CA   .  SER  A  115  ?    6.74998  -36.79572   21.93758  1.000    7.26309  C   ?  A  ?    92  1
  ATOM     747  C    .  SER  A  115  ?    8.20652  -36.59879   21.52603  1.000    7.72491  C   ?  A  ?    92  1
  ATOM     748  O    .  SER  A  115  ?    8.59607  -35.52115   21.06877  1.000   10.51168  O   ?  A  ?    92  1
  ATOM     749  CB   .  SER  A  115  ?    5.86295  -36.92546   20.69988  1.000   12.06506  C   ?  A  ?    92  1
  ATOM     750  OG   .  SER  A  115  ?    6.45861  -37.77474   19.73491  1.000   14.63661  O   ?  A  ?    92  1
  ATOM     751  O    .  ASP  A  116  ?   10.99016  -39.90079   21.76325  1.000   10.03957  O   ?  A  ?    93  1
  ATOM     752  N    .  ASP  A  116  ?    9.00941  -37.65154   21.68882  1.000    8.66485  N   ?  A  ?    93  1
  ATOM     753  CA   .  ASP  A  116  ?   10.43393  -37.60961   21.35931  1.000    8.48791  C   ?  A  ?    93  1
  ATOM     754  C    .  ASP  A  116  ?   10.85172  -39.00662   20.92483  1.000   10.51321  C   ?  A  ?    93  1
  ATOM     755  CB   .  ASP  A  116  ?   11.25971  -37.14162   22.55475  1.000    5.93907  C   ?  A  ?    93  1
  ATOM     756  CG   .  ASP  A  116  ?   12.71577  -36.87733   22.20210  1.000    7.14141  C   ?  A  ?    93  1
  ATOM     757  OD1  .  ASP  A  116  ?   13.14481  -37.20225   21.07319  1.000    8.64088  O   ?  A  ?    93  1
  ATOM     758  OD2  .  ASP  A  116  ?   13.43872  -36.34525   23.06926  1.000    5.65610  O   ?  A  ?    93  1
  ATOM     759  O    .  GLU  A  117  ?   13.35657  -41.74548   18.49989  1.000   19.17169  O   ?  A  ?    94  1
  ATOM     760  N    .  GLU  A  117  ?   11.06583  -39.19600   19.62908  1.000   11.65569  N   ?  A  ?    94  1
  ATOM     761  CA   .  GLU  A  117  ?   11.40884  -40.51161   19.11314  1.000   16.88039  C   ?  A  ?    94  1
  ATOM     762  C    .  GLU  A  117  ?   12.90688  -40.78697   19.13458  1.000   16.48717  C   ?  A  ?    94  1
  ATOM     763  CB   .  GLU  A  117  ?   10.84287  -40.67925   17.70337  1.000   24.84339  C   ?  A  ?    94  1
  ATOM     764  CG   .  GLU  A  117  ?    9.35002  -40.97269   17.71933  1.000   34.67553  C   ?  A  ?    94  1
  ATOM     765  CD   .  GLU  A  117  ?    8.62611  -40.45723   16.49541  1.000   44.23666  C   ?  A  ?    94  1
  ATOM     766  OE1  .  GLU  A  117  ?    7.71673  -39.61226   16.65473  1.000   48.94978  O   ?  A  ?    94  1
  ATOM     767  OE2  .  GLU  A  117  ?    8.96628  -40.89585   15.37634  1.000   45.03508  O   ?  A  ?    94  1
  ATOM     768  O    .  THR  A  118  ?   16.50086  -41.20000   21.76215  1.000   10.74411  O   ?  A  ?    95  1
  ATOM     769  N    .  THR  A  118  ?   13.68318  -39.98106   19.85604  1.000   11.22286  N   ?  A  ?    95  1
  ATOM     770  CA   .  THR  A  118  ?   15.09449  -40.25534   20.08440  1.000    9.17462  C   ?  A  ?    95  1
  ATOM     771  C    .  THR  A  118  ?   15.34452  -40.93395   21.42282  1.000    9.12167  C   ?  A  ?    95  1
  ATOM     772  CB   .  THR  A  118  ?   15.91219  -38.96189   20.00461  1.000   11.08364  C   ?  A  ?    95  1
  ATOM     773  OG1  .  THR  A  118  ?   15.60024  -38.12814   21.12782  1.000    9.37938  O   ?  A  ?    95  1
  ATOM     774  CG2  .  THR  A  118  ?   15.59902  -38.21218   18.71726  1.000   12.10414  C   ?  A  ?    95  1
  ATOM     775  O    .  VAL  A  119  ?   12.82841  -43.42727   22.41693  1.000   13.48870  O   ?  A  ?    96  1
  ATOM     776  N    .  VAL  A  119  ?   14.29260  -41.21314   22.18892  1.000    7.22262  N   ?  A  ?    96  1
  ATOM     777  CA   .  VAL  A  119  ?   14.39882  -41.92047   23.45523  1.000    9.80693  C   ?  A  ?    96  1
  ATOM     778  C    .  VAL  A  119  ?   13.58837  -43.21166   23.35962  1.000   12.29715  C   ?  A  ?    96  1
  ATOM     779  CB   .  VAL  A  119  ?   13.93303  -41.05902   24.64558  1.000    6.50217  C   ?  A  ?    96  1
  ATOM     780  CG1  .  VAL  A  119  ?   14.74765  -39.77658   24.71627  1.000    8.08324  C   ?  A  ?    96  1
  ATOM     781  CG2  .  VAL  A  119  ?   12.45201  -40.74419   24.52609  1.000    6.85617  C   ?  A  ?    96  1
  ATOM     782  O    .  GLN  A  120  ?   12.49040  -44.74187   26.66072  1.000   13.03816  O   ?  A  ?    97  1
  ATOM     783  N    .  GLN  A  120  ?   13.77206  -44.07842   24.34741  1.000   10.92979  N   ?  A  ?    97  1
  ATOM     784  CA   .  GLN  A  120  ?   13.08260  -45.35637   24.42169  1.000   14.60630  C   ?  A  ?    97  1
  ATOM     785  C    .  GLN  A  120  ?   12.20759  -45.41075   25.66071  1.000   10.73985  C   ?  A  ?    97  1
  ATOM     786  CB   .  GLN  A  120  ?   14.05799  -46.54177   24.48126  1.000   19.24050  C   ?  A  ?    97  1
  ATOM     787  CG   .  GLN  A  120  ?   15.31081  -46.38659   23.67360  1.000   26.29744  C   ?  A  ?    97  1
  ATOM     788  CD   .  GLN  A  120  ?   15.02741  -46.16524   22.21516  1.000   31.46768  C   ?  A  ?    97  1
  ATOM     789  OE1  .  GLN  A  120  ?   15.66395  -45.33145   21.57783  1.000   34.03728  O   ?  A  ?    97  1
  ATOM     790  NE2  .  GLN  A  120  ?   14.07228  -46.91297   21.66980  1.000   33.32443  N   ?  A  ?    97  1
  ATOM     791  O    .  PRO  A  121  ?   12.08154  -48.03378   27.55619  1.000   15.61569  O   ?  A  ?    98  1
  ATOM     792  N    .  PRO  A  121  ?   11.15508  -46.22381   25.64189  1.000    9.99797  N   ?  A  ?    98  1
  ATOM     793  CA   .  PRO  A  121  ?   10.39348  -46.45951   26.86987  1.000   12.01216  C   ?  A  ?    98  1
  ATOM     794  C    .  PRO  A  121  ?   11.22833  -47.21044   27.89358  1.000   12.20627  C   ?  A  ?    98  1
  ATOM     795  CB   .  PRO  A  121  ?    9.20580  -47.30282   26.39346  1.000   12.09365  C   ?  A  ?    98  1
  ATOM     796  CG   .  PRO  A  121  ?    9.70916  -47.98250   25.16233  1.000   14.27032  C   ?  A  ?    98  1
  ATOM     797  CD   .  PRO  A  121  ?   10.60503  -46.97674   24.50114  1.000   13.29963  C   ?  A  ?    98  1
  ATOM     798  O    .  VAL  A  122  ?    9.84938  -47.28908   31.81884  1.000   11.85881  O   ?  A  ?    99  1
  ATOM     799  N    .  VAL  A  122  ?   10.97664  -46.91110   29.16346  1.000    8.59716  N   ?  A  ?    99  1
  ATOM     800  CA   .  VAL  A  122  ?   11.65872  -47.56229   30.27494  1.000   10.16051  C   ?  A  ?    99  1
  ATOM     801  C    .  VAL  A  122  ?   10.59417  -48.08014   31.22881  1.000    9.82277  C   ?  A  ?    99  1
  ATOM     802  CB   .  VAL  A  122  ?   12.62403  -46.61105   30.99992  1.000    9.24589  C   ?  A  ?    99  1
  ATOM     803  CG1  .  VAL  A  122  ?   13.15236  -47.25929   32.26768  1.000   10.13640  C   ?  A  ?    99  1
  ATOM     804  CG2  .  VAL  A  122  ?   13.76798  -46.22520   30.08539  1.000   12.29446  C   ?  A  ?    99  1
  ATOM     805  O    .  GLY  A  123  ?    7.42525  -51.19547   31.91754  1.000   14.23397  O   ?  A  ?   100  1
  ATOM     806  N    .  GLY  A  123  ?   10.52263  -49.40090   31.38188  1.000    9.41996  N   ?  A  ?   100  1
  ATOM     807  CA   .  GLY  A  123  ?    9.48549  -50.03527   32.16615  1.000   11.53809  C   ?  A  ?   100  1
  ATOM     808  C    .  GLY  A  123  ?    8.29971  -50.51886   31.36158  1.000   11.88885  C   ?  A  ?   100  1
  ATOM     809  O    .  THR  A  124  ?    8.84660  -50.24112   27.49399  1.000   15.93106  O   ?  A  ?   101  1
  ATOM     810  N    .  THR  A  124  ?    8.23942  -50.18022   30.07767  1.000   13.62758  N   ?  A  ?   101  1
  ATOM     811  CA   .  THR  A  124  ?    7.20211  -50.67204   29.18780  1.000   13.09779  C   ?  A  ?   101  1
  ATOM     812  C    .  THR  A  124  ?    7.80696  -50.82640   27.80450  1.000   14.18762  C   ?  A  ?   101  1
  ATOM     813  CB   .  THR  A  124  ?    5.99233  -49.73302   29.13195  1.000   16.59095  C   ?  A  ?   101  1
  ATOM     814  OG1  .  THR  A  124  ?    5.00538  -50.27408   28.24410  1.000   18.70803  O   ?  A  ?   101  1
  ATOM     815  CG2  .  THR  A  124  ?    6.40751  -48.35951   28.63057  1.000   17.08624  C   ?  A  ?   101  1
  ATOM     816  O    .  THR  A  125  ?    7.11407  -50.91833   23.43554  1.000   16.20186  O   ?  A  ?   102  1
  ATOM     817  N    .  THR  A  125  ?    7.14976  -51.63029   26.97628  1.000   14.75513  N   ?  A  ?   102  1
  ATOM     818  CA   .  THR  A  125  ?    7.57074  -51.81427   25.59710  1.000   17.82028  C   ?  A  ?   102  1
  ATOM     819  C    .  THR  A  125  ?    6.80089  -50.93029   24.62956  1.000   16.95768  C   ?  A  ?   102  1
  ATOM     820  CB   .  THR  A  125  ?    7.42120  -53.28020   25.18536  1.000   20.17917  C   ?  A  ?   102  1
  ATOM     821  OG1  .  THR  A  125  ?    6.05215  -53.67952   25.32235  1.000   22.92959  O   ?  A  ?   102  1
  ATOM     822  CG2  .  THR  A  125  ?    8.29995  -54.16634   26.05683  1.000   19.37850  C   ?  A  ?   102  1
  ATOM     823  O    .  SER  A  126  ?    6.23921  -47.33720   24.80899  1.000   15.36443  O   ?  A  ?   103  1
  ATOM     824  N    .  SER  A  126  ?    5.80937  -50.19101   25.11214  1.000   16.02300  N   ?  A  ?   103  1
  ATOM     825  CA   .  SER  A  126  ?    5.01757  -49.32552   24.25100  1.000   15.41512  C   ?  A  ?   103  1
  ATOM     826  C    .  SER  A  126  ?    5.81615  -48.07303   23.91136  1.000   16.08184  C   ?  A  ?   103  1
  ATOM     827  CB   .  SER  A  126  ?    3.70424  -48.95980   24.93519  1.000   14.28891  C   ?  A  ?   103  1
  ATOM     828  OG   .  SER  A  126  ?    2.97609  -48.02708   24.16019  1.000   15.47859  O   ?  A  ?   103  1
  ATOM     829  O    .  ASN  A  127  ?    6.27382  -44.33308   22.81172  1.000   19.00413  O   ?  A  ?   104  1
  ATOM     830  N    .  ASN  A  127  ?    6.02419  -47.83054   22.61597  1.000   17.08220  N   ?  A  ?   104  1
  ATOM     831  CA   .  ASN  A  127  ?    6.71156  -46.61123   22.20328  1.000   16.86084  C   ?  A  ?   104  1
  ATOM     832  C    .  ASN  A  127  ?    5.81631  -45.38921   22.35991  1.000   17.56984  C   ?  A  ?   104  1
  ATOM     833  CB   .  ASN  A  127  ?    7.19122  -46.73651   20.75897  1.000   15.75075  C   ?  A  ?   104  1
  ATOM     834  CG   .  ASN  A  127  ?    8.47601  -47.52266   20.64007  1.000   17.55185  C   ?  A  ?   104  1
  ATOM     835  OD1  .  ASN  A  127  ?    9.19523  -47.70879   21.61958  1.000   18.36576  O   ?  A  ?   104  1
  ATOM     836  ND2  .  ASN  A  127  ?    8.77796  -47.98131   19.43291  1.000   19.65420  N   ?  A  ?   104  1
  ATOM     837  O    .  SER  A  128  ?    3.17976  -42.73196   23.76604  1.000   10.13859  O   ?  A  ?   105  1
  ATOM     838  N    .  SER  A  128  ?    4.53891  -45.51083   21.98866  1.000   16.32775  N   ?  A  ?   105  1
  ATOM     839  CA   .  SER  A  128  ?    3.63127  -44.37137   22.07845  1.000   18.82050  C   ?  A  ?   105  1
  ATOM     840  C    .  SER  A  128  ?    3.44762  -43.91323   23.51819  1.000   13.83681  C   ?  A  ?   105  1
  ATOM     841  CB   .  SER  A  128  ?    2.27834  -44.72749   21.46197  1.000   22.91849  C   ?  A  ?   105  1
  ATOM     842  OG   .  SER  A  128  ?    1.57508  -45.65011   22.27699  1.000   23.49669  O   ?  A  ?   105  1
  ATOM     843  O    .  VAL  A  129  ?    4.71069  -43.07480   27.35185  1.000   12.01361  O   ?  A  ?   106  1
  ATOM     844  N    .  VAL  A  129  ?    3.58932  -44.82609   24.47465  1.000   13.51118  N   ?  A  ?   106  1
  ATOM     845  CA   .  VAL  A  129  ?    3.43552  -44.47275   25.87915  1.000   14.53561  C   ?  A  ?   106  1
  ATOM     846  C    .  VAL  A  129  ?    4.73923  -43.95123   26.48113  1.000   12.97983  C   ?  A  ?   106  1
  ATOM     847  CB   .  VAL  A  129  ?    2.90323  -45.68787   26.66114  1.000   18.01386  C   ?  A  ?   106  1
  ATOM     848  CG1  .  VAL  A  129  ?    2.89545  -45.41657   28.15662  1.000   20.71979  C   ?  A  ?   106  1
  ATOM     849  CG2  .  VAL  A  129  ?    1.50476  -46.04893   26.18408  1.000   20.29371  C   ?  A  ?   106  1
  ATOM     850  O    .  GLY  A  130  ?    9.03747  -42.72253   26.60720  1.000    9.07330  O   ?  A  ?   107  1
  ATOM     851  N    .  GLY  A  130  ?    5.88498  -44.44258   26.01496  1.000   12.01965  N   ?  A  ?   107  1
  ATOM     852  CA   .  GLY  A  130  ?    7.14049  -44.15036   26.67688  1.000   10.34733  C   ?  A  ?   107  1
  ATOM     853  C    .  GLY  A  130  ?    8.09951  -43.20844   25.97605  1.000    6.74989  C   ?  A  ?   107  1
  ATOM     854  N    .  GLN  A  131  ?    7.89758  -42.93233   24.68733  1.000    4.56632  N   ?  A  ?   108  1
  ATOM     855  CA   .  GLN  A  131  ?    8.82539  -42.08071   23.93717  1.000    4.50587  C   ?  A  ?   108  1
  ATOM     856  C    .  GLN  A  131  ?    8.45340  -40.61203   24.12769  1.000    8.23247  C   ?  A  ?   108  1
  ATOM     857  O    .  GLN  A  131  ?    7.84977  -39.97047   23.26463  1.000    6.82471  O   ?  A  ?   108  1
  ATOM     858  CB   .  GLN  A  131  ?    8.83054  -42.46184   22.46442  1.000    5.77601  C   ?  A  ?   108  1
  ATOM     859  CG   .  GLN  A  131  ?    9.56144  -43.74924   22.16872  1.000    7.76161  C   ?  A  ?   108  1
  ATOM     860  CD   .  GLN  A  131  ?    9.81637  -43.92765   20.69181  1.000    8.80979  C   ?  A  ?   108  1
  ATOM     861  NE2  .  GLN  A  131  ?   11.08283  -44.07397   20.32233  1.000   10.81831  N   ?  A  ?   108  1
  ATOM     862  OE1  .  GLN  A  131  ?    8.88633  -43.91903   19.88767  1.000   10.68344  O   ?  A  ?   108  1
  ATOM     863  N    .  HIS  A  132  ?    8.85084  -40.06654   25.27744  1.000    6.19743  N   ?  A  ?   109  1
  ATOM     864  CA   .  HIS  A  132  ?    8.54031  -38.68778   25.62837  1.000    4.41936  C   ?  A  ?   109  1
  ATOM     865  C    .  HIS  A  132  ?    9.71380  -38.06074   26.36856  1.000    5.44139  C   ?  A  ?   109  1
  ATOM     866  O    .  HIS  A  132  ?   10.51133  -38.74794   27.00987  1.000    7.91229  O   ?  A  ?   109  1
  ATOM     867  CB   .  HIS  A  132  ?    7.27188  -38.59835   26.48422  1.000    4.52953  C   ?  A  ?   109  1
  ATOM     868  CG   .  HIS  A  132  ?    6.05007  -39.12181   25.80085  1.000    5.45322  C   ?  A  ?   109  1
  ATOM     869  ND1  .  HIS  A  132  ?    5.26065  -38.33973   24.98609  1.000    8.17587  N   ?  A  ?   109  1
  ATOM     870  CD2  .  HIS  A  132  ?    5.48889  -40.35338   25.79922  1.000    6.49948  C   ?  A  ?   109  1
  ATOM     871  CE1  .  HIS  A  132  ?    4.26444  -39.06646   24.51333  1.000    7.13568  C   ?  A  ?   109  1
  ATOM     872  NE2  .  HIS  A  132  ?    4.37971  -40.29203   24.99193  1.000    6.62209  N   ?  A  ?   109  1
  ATOM     873  N    .  SER  A  133  ?    9.80128  -36.73371   26.27982  1.000    4.85744  N   ?  A  ?   110  1
  ATOM     874  CA   .  SER  A  133  ?   10.87728  -35.98285   26.91323  1.000    7.03924  C   ?  A  ?   110  1
  ATOM     875  C    .  SER  A  133  ?   10.49218  -34.50854   26.99264  1.000    5.16343  C   ?  A  ?   110  1
  ATOM     876  O    .  SER  A  133  ?    9.48866  -34.10408   26.39053  1.000    7.58662  O   ?  A  ?   110  1
  ATOM     877  CB   .  SER  A  133  ?   12.18083  -36.15572   26.12862  1.000    5.95838  C   ?  A  ?   110  1
  ATOM     878  OG   .  SER  A  133  ?   12.24497  -35.22624   25.06317  1.000    8.65300  O   ?  A  ?   110  1
  ATOM     879  N    .  PRO  A  134  ?   11.25901  -33.66871   27.72182  1.000    6.98719  N   ?  A  ?   111  1
  ATOM     880  CA   .  PRO  A  134  ?   10.93133  -32.23664   27.77911  1.000    3.65464  C   ?  A  ?   111  1
  ATOM     881  C    .  PRO  A  134  ?   11.61715  -31.40850   26.70373  1.000    5.20423  C   ?  A  ?   111  1
  ATOM     882  O    .  PRO  A  134  ?   11.76001  -30.19332   26.86444  1.000    7.62270  O   ?  A  ?   111  1
  ATOM     883  CB   .  PRO  A  134  ?   11.42359  -31.83302   29.17379  1.000    5.80922  C   ?  A  ?   111  1
  ATOM     884  CG   .  PRO  A  134  ?   12.59955  -32.70804   29.39014  1.000    3.68331  C   ?  A  ?   111  1
  ATOM     885  CD   .  PRO  A  134  ?   12.25623  -34.03366   28.74794  1.000    6.13341  C   ?  A  ?   111  1
  ATOM     886  N    .  ARG  A  135  ?   12.02503  -32.03854   25.59884  1.000    4.77340  N   ?  A  ?   112  1
  ATOM     887  CA   .  ARG  A  135  ?   12.89530  -31.36711   24.63580  1.000    7.57609  C   ?  A  ?   112  1
  ATOM     888  C    .  ARG  A  135  ?   12.21459  -30.22622   23.88517  1.000    9.23491  C   ?  A  ?   112  1
  ATOM     889  O    .  ARG  A  135  ?   12.91382  -29.37053   23.32974  1.000    8.63127  O   ?  A  ?   112  1
  ATOM     890  CB   .  ARG  A  135  ?   13.45532  -32.38043   23.64001  1.000    6.53527  C   ?  A  ?   112  1
  ATOM     891  CG   .  ARG  A  135  ?   14.57051  -33.23296   24.21843  1.000    9.97739  C   ?  A  ?   112  1
  ATOM     892  CD   .  ARG  A  135  ?   15.48346  -33.76572   23.12838  1.000   13.82898  C   ?  A  ?   112  1
  ATOM     893  NE   .  ARG  A  135  ?   16.74719  -34.25356   23.67207  1.000   19.29427  N   ?  A  ?   112  1
  ATOM     894  CZ   .  ARG  A  135  ?   16.98660  -35.52120   23.98963  1.000   22.63703  C   ?  A  ?   112  1
  ATOM     895  NH1  .  ARG  A  135  ?   18.17006  -35.87091   24.47966  1.000   25.50994  N   ?  A  ?   112  1
  ATOM     896  NH2  .  ARG  A  135  ?   16.04624  -36.44030   23.81238  1.000   18.43713  N   ?  A  ?   112  1
  ATOM     897  N    .  ASN  A  136  ?   10.88366  -30.18527   23.84697  1.000    7.78433  N   ?  A  ?   113  1
  ATOM     898  CA   .  ASN  A  136  ?   10.19394  -29.07855   23.19239  1.000    8.62628  C   ?  A  ?   113  1
  ATOM     899  C    .  ASN  A  136  ?   10.10489  -27.83389   24.06873  1.000    8.11129  C   ?  A  ?   113  1
  ATOM     900  O    .  ASN  A  136  ?    9.63918  -26.79209   23.59455  1.000    5.97888  O   ?  A  ?   113  1
  ATOM     901  CB   .  ASN  A  136  ?    8.78782  -29.50879   22.76007  1.000   10.01329  C   ?  A  ?   113  1
  ATOM     902  CG   .  ASN  A  136  ?    8.79697  -30.38229   21.51506  1.000   10.15522  C   ?  A  ?   113  1
  ATOM     903  ND2  .  ASN  A  136  ?    7.88552  -31.34592   21.46490  1.000   10.87602  N   ?  A  ?   113  1
  ATOM     904  OD1  .  ASN  A  136  ?    9.60684  -30.18838   20.60871  1.000    9.36882  O   ?  A  ?   113  1
  ATOM     905  N    .  LEU  A  137  ?   10.54138  -27.91443   25.32247  1.000    4.61357  N   ?  A  ?   114  1
  ATOM     906  CA   .  LEU  A  137  ?   10.49078  -26.78915   26.24681  1.000    6.17862  C   ?  A  ?   114  1
  ATOM     907  C    .  LEU  A  137  ?   11.75990  -25.95438   26.10580  1.000    7.84832  C   ?  A  ?   114  1
  ATOM     908  O    .  LEU  A  137  ?   12.86982  -26.46830   26.28179  1.000    9.02679  O   ?  A  ?   114  1
  ATOM     909  CB   .  LEU  A  137  ?   10.32847  -27.29303   27.67959  1.000    6.65351  C   ?  A  ?   114  1
  ATOM     910  CG   .  LEU  A  137  ?   10.44836  -26.25348   28.79075  1.000    8.53588  C   ?  A  ?   114  1
  ATOM     911  CD1  .  LEU  A  137  ?    9.46380  -25.12371   28.57043  1.000    8.74479  C   ?  A  ?   114  1
  ATOM     912  CD2  .  LEU  A  137  ?   10.21577  -26.90986   30.13693  1.000   12.55101  C   ?  A  ?   114  1
  ATOM     913  N    .  TRP  A  138  ?   11.59400  -24.66544   25.80785  1.000    7.44999  N   ?  A  ?   115  1
  ATOM     914  CA   .  TRP  A  138  ?   12.72787  -23.79107   25.53097  1.000    5.98786  C   ?  A  ?   115  1
  ATOM     915  C    .  TRP  A  138  ?   13.25042  -23.06116   26.75797  1.000    6.06066  C   ?  A  ?   115  1
  ATOM     916  O    .  TRP  A  138  ?   14.43615  -22.71480   26.80080  1.000    8.94955  O   ?  A  ?   115  1
  ATOM     917  CB   .  TRP  A  138  ?   12.34272  -22.75785   24.47433  1.000    5.79371  C   ?  A  ?   115  1
  ATOM     918  CG   .  TRP  A  138  ?   12.00121  -23.36451   23.16648  1.000    5.74075  C   ?  A  ?   115  1
  ATOM     919  CD1  .  TRP  A  138  ?   12.24876  -24.64235   22.76777  1.000    9.61045  C   ?  A  ?   115  1
  ATOM     920  CD2  .  TRP  A  138  ?   11.34659  -22.72017   22.07134  1.000    6.07143  C   ?  A  ?   115  1
  ATOM     921  NE1  .  TRP  A  138  ?   11.78686  -24.83706   21.48974  1.000    5.56553  N   ?  A  ?   115  1
  ATOM     922  CE2  .  TRP  A  138  ?   11.22949  -23.66959   21.03890  1.000    7.59963  C   ?  A  ?   115  1
  ATOM     923  CE3  .  TRP  A  138  ?   10.84669  -21.43221   21.86360  1.000    8.02441  C   ?  A  ?   115  1
  ATOM     924  CZ2  .  TRP  A  138  ?   10.63178  -23.37184   19.81605  1.000    7.52500  C   ?  A  ?   115  1
  ATOM     925  CZ3  .  TRP  A  138  ?   10.25466  -21.13815   20.65129  1.000    5.85448  C   ?  A  ?   115  1
  ATOM     926  CH2  .  TRP  A  138  ?   10.15238  -22.10266   19.64200  1.000    7.76238  C   ?  A  ?   115  1
  ATOM     927  N    .  SER  A  139  ?   12.39750  -22.79230   27.73800  1.000    7.45003  N   ?  A  ?   116  1
  ATOM     928  CA   .  SER  A  139  ?   12.77970  -22.04233   28.92371  1.000    5.57388  C   ?  A  ?   116  1
  ATOM     929  C    .  SER  A  139  ?   12.98152  -22.98710   30.09846  1.000    5.76784  C   ?  A  ?   116  1
  ATOM     930  O    .  SER  A  139  ?   12.41006  -24.07639   30.15208  1.000    8.37006  O   ?  A  ?   116  1
  ATOM     931  CB   .  SER  A  139  ?   11.71648  -20.99857   29.27522  1.000    3.07749  C   ?  A  ?   116  1
  ATOM     932  OG   .  SER  A  139  ?   11.44826  -20.15145   28.17271  1.000    9.36019  O   ?  A  ?   116  1
  ATOM     933  N    .  THR  A  140  ?   13.80349  -22.55588   31.04855  1.000    7.06237  N   ?  A  ?   117  1
  ATOM     934  CA   .  THR  A  140  ?   14.01344  -23.37357   32.23041  1.000    4.57831  C   ?  A  ?   117  1
  ATOM     935  C    .  THR  A  140  ?   12.81737  -23.26710   33.17116  1.000    6.27092  C   ?  A  ?   117  1
  ATOM     936  O    .  THR  A  140  ?   12.01960  -22.32716   33.10983  1.000    5.75725  O   ?  A  ?   117  1
  ATOM     937  CB   .  THR  A  140  ?   15.29049  -22.96466   32.96913  1.000    3.88647  C   ?  A  ?   117  1
  ATOM     938  OG1  .  THR  A  140  ?   15.15187  -21.62712   33.46588  1.000    3.00966  O   ?  A  ?   117  1
  ATOM     939  CG2  .  THR  A  140  ?   16.49686  -23.04632   32.04622  1.000    6.86330  C   ?  A  ?   117  1
  ATOM     940  N    .  THR  A  141  ?   12.70052  -24.25867   34.04454  1.000    5.07549  N   ?  A  ?   118  1
  ATOM     941  CA   .  THR  A  141  ?   11.67648  -24.30179   35.07456  1.000    3.98720  C   ?  A  ?   118  1
  ATOM     942  C    .  THR  A  141  ?   12.27671  -23.89850   36.41390  1.000    2.27250  C   ?  A  ?   118  1
  ATOM     943  O    .  THR  A  141  ?   13.49571  -23.81528   36.57743  1.000    2.30562  O   ?  A  ?   118  1
  ATOM     944  CB   .  THR  A  141  ?   11.06795  -25.70418   35.18162  1.000    2.24518  C   ?  A  ?   118  1
  ATOM     945  CG2  .  THR  A  141  ?   10.41665  -26.11531   33.86719  1.000    3.49061  C   ?  A  ?   118  1
  ATOM     946  OG1  .  THR  A  141  ?   12.10169  -26.64285   35.50701  1.000    2.27763  O   ?  A  ?   118  1
  ATOM     947  N    .  VAL  A  142  ?   11.39534  -23.65315   37.38574  1.000    2.28238  N   ?  A  ?   119  1
  ATOM     948  CA   .  VAL  A  142  ?   11.85692  -23.42045   38.74999  1.000    6.46028  C   ?  A  ?   119  1
  ATOM     949  C    .  VAL  A  142  ?   12.53803  -24.66954   39.29686  1.000    7.88691  C   ?  A  ?   119  1
  ATOM     950  O    .  VAL  A  142  ?   13.46160  -24.57826   40.11690  1.000    7.74513  O   ?  A  ?   119  1
  ATOM     951  CB   .  VAL  A  142  ?   10.68075  -22.95790   39.63765  1.000    8.78836  C   ?  A  ?   119  1
  ATOM     952  CG1  .  VAL  A  142  ?    9.56125  -23.99362   39.64820  1.000    7.17817  C   ?  A  ?   119  1
  ATOM     953  CG2  .  VAL  A  142  ?   11.15483  -22.64536   41.05135  1.000    7.85769  C   ?  A  ?   119  1
  ATOM     954  N    .  THR  A  143  ?   12.11384  -25.85149   38.83965  1.000    9.57927  N   ?  A  ?   120  1
  ATOM     955  CA   .  THR  A  143  ?   12.81146  -27.08092   39.20360  1.000    6.76614  C   ?  A  ?   120  1
  ATOM     956  C    .  THR  A  143  ?   14.19325  -27.14369   38.56089  1.000    5.52674  C   ?  A  ?   120  1
  ATOM     957  O    .  THR  A  143  ?   15.13977  -27.65609   39.16803  1.000    8.81202  O   ?  A  ?   120  1
  ATOM     958  CB   .  THR  A  143  ?   11.97621  -28.29893   38.81051  1.000    6.39839  C   ?  A  ?   120  1
  ATOM     959  OG1  .  THR  A  143  ?   11.43902  -28.11085   37.49453  1.000    5.85427  O   ?  A  ?   120  1
  ATOM     960  CG2  .  THR  A  143  ?   10.83835  -28.50118   39.79773  1.000    4.74031  C   ?  A  ?   120  1
  ATOM     961  N    .  ASP  A  144  ?   14.32939  -26.63304   37.33235  1.000    7.81009  N   ?  A  ?   121  1
  ATOM     962  CA   .  ASP  A  144  ?   15.65584  -26.48654   36.73743  1.000    5.96547  C   ?  A  ?   121  1
  ATOM     963  C    .  ASP  A  144  ?   16.52910  -25.55443   37.56755  1.000    3.83374  C   ?  A  ?   121  1
  ATOM     964  O    .  ASP  A  144  ?   17.70993  -25.83960   37.80100  1.000    2.85409  O   ?  A  ?   121  1
  ATOM     965  CB   .  ASP  A  144  ?   15.55177  -25.94878   35.30797  1.000    7.09576  C   ?  A  ?   121  1
  ATOM     966  CG   .  ASP  A  144  ?   15.03863  -26.97361   34.32268  1.000    6.90364  C   ?  A  ?   121  1
  ATOM     967  OD1  .  ASP  A  144  ?   15.14924  -28.18657   34.59870  1.000    4.76380  O   ?  A  ?   121  1
  ATOM     968  OD2  .  ASP  A  144  ?   14.53685  -26.55636   33.25482  1.000    8.50780  O   ?  A  ?   121  1
  ATOM     969  N    .  GLN  A  145  ?   15.96537  -24.42721   38.01400  1.000    5.43664  N   ?  A  ?   122  1
  ATOM     970  CA   .  GLN  A  145  ?   16.75098  -23.43484   38.74224  1.000    3.68588  C   ?  A  ?   122  1
  ATOM     971  C    .  GLN  A  145  ?   17.15878  -23.93328   40.11895  1.000    5.78697  C   ?  A  ?   122  1
  ATOM     972  O    .  GLN  A  145  ?   18.23244  -23.57210   40.61302  1.000    7.12261  O   ?  A  ?   122  1
  ATOM     973  CB   .  GLN  A  145  ?   15.96761  -22.13107   38.87207  1.000    5.24611  C   ?  A  ?   122  1
  ATOM     974  CG   .  GLN  A  145  ?   15.67454  -21.45321   37.54550  1.000    5.67519  C   ?  A  ?   122  1
  ATOM     975  CD   .  GLN  A  145  ?   16.93377  -21.02719   36.81451  1.000    7.62302  C   ?  A  ?   122  1
  ATOM     976  OE1  .  GLN  A  145  ?   17.93149  -20.64969   37.43307  1.000    9.89286  O   ?  A  ?   122  1
  ATOM     977  NE2  .  GLN  A  145  ?   16.89556  -21.09073   35.48894  1.000    3.80332  N   ?  A  ?   122  1
  ATOM     978  N    .  LEU  A  146  ?   16.31663  -24.74583   40.75735  1.000    7.87057  N   ?  A  ?   123  1
  ATOM     979  CA   .  LEU  A  146  ?   16.70912  -25.34933   42.02482  1.000    7.21075  C   ?  A  ?   123  1
  ATOM     980  C    .  LEU  A  146  ?   17.92700  -26.24461   41.84453  1.000    8.77248  C   ?  A  ?   123  1
  ATOM     981  O    .  LEU  A  146  ?   18.86350  -26.20468   42.65055  1.000    7.36300  O   ?  A  ?   123  1
  ATOM     982  CB   .  LEU  A  146  ?   15.54086  -26.13627   42.61445  1.000   10.86671  C   ?  A  ?   123  1
  ATOM     983  CG   .  LEU  A  146  ?   15.84082  -26.83901   43.93657  1.000   13.54546  C   ?  A  ?   123  1
  ATOM     984  CD1  .  LEU  A  146  ?   16.35106  -25.84484   44.96980  1.000   11.01455  C   ?  A  ?   123  1
  ATOM     985  CD2  .  LEU  A  146  ?   14.60792  -27.55715   44.44634  1.000   15.53535  C   ?  A  ?   123  1
  ATOM     986  N    .  GLY  A  147  ?   17.93334  -27.05584   40.78664  1.000    9.50455  N   ?  A  ?   124  1
  ATOM     987  CA   .  GLY  A  147  ?   19.09940  -27.87487   40.50430  1.000   13.20534  C   ?  A  ?   124  1
  ATOM     988  C    .  GLY  A  147  ?   20.33372  -27.04150   40.22168  1.000   13.27678  C   ?  A  ?   124  1
  ATOM     989  O    .  GLY  A  147  ?   21.42747  -27.35129   40.69986  1.000   15.96633  O   ?  A  ?   124  1
  ATOM     990  N    .  LEU  A  148  ?   20.17114  -25.96194   39.45234  1.000    9.55334  N   ?  A  ?   125  1
  ATOM     991  CA   .  LEU  A  148  ?   21.29291  -25.07314   39.16957  1.000    8.15369  C   ?  A  ?   125  1
  ATOM     992  C    .  LEU  A  148  ?   21.79270  -24.38017   40.42892  1.000   10.89357  C   ?  A  ?   125  1
  ATOM     993  O    .  LEU  A  148  ?   22.98505  -24.07726   40.53548  1.000   13.86270  O   ?  A  ?   125  1
  ATOM     994  CB   .  LEU  A  148  ?   20.89040  -24.03451   38.12151  1.000    5.23783  C   ?  A  ?   125  1
  ATOM     995  CG   .  LEU  A  148  ?   20.71938  -24.56413   36.69840  1.000    5.76528  C   ?  A  ?   125  1
  ATOM     996  CD1  .  LEU  A  148  ?   19.93281  -23.59289   35.83187  1.000    6.31565  C   ?  A  ?   125  1
  ATOM     997  CD2  .  LEU  A  148  ?   22.07708  -24.83976   36.08960  1.000    6.81032  C   ?  A  ?   125  1
  ATOM     998  O    .  ALA  A  149  ?   22.52941  -23.86851   44.60911  1.000   14.86635  O   ?  A  ?   126  1
  ATOM     999  N    .  ALA  A  149  ?   20.90687  -24.12977   41.39419  1.000    6.93639  N   ?  A  ?   126  1
  ATOM    1000  CA   .  ALA  A  149  ?   21.30142  -23.43567   42.61317  1.000    5.25999  C   ?  A  ?   126  1
  ATOM    1001  C    .  ALA  A  149  ?   21.90548  -24.35844   43.66247  1.000   13.31972  C   ?  A  ?   126  1
  ATOM    1002  CB   .  ALA  A  149  ?   20.10194  -22.70832   43.21708  1.000   10.18799  C   ?  A  ?   126  1
  ATOM    1003  O    .  THR  A  150  ?   23.58372  -28.59530   44.50759  1.000   16.94536  O   ?  A  ?   127  1
  ATOM    1004  N    .  THR  A  150  ?   21.72794  -25.67360   43.53081  1.000   15.04100  N   ?  A  ?   127  1
  ATOM    1005  CA   .  THR  A  150  ?   22.23304  -26.62564   44.51330  1.000   14.95421  C   ?  A  ?   127  1
  ATOM    1006  C    .  THR  A  150  ?   23.29744  -27.54278   43.92892  1.000   16.67323  C   ?  A  ?   127  1
  ATOM    1007  CB   .  THR  A  150  ?   21.09062  -27.46423   45.08642  1.000   15.78075  C   ?  A  ?   127  1
  ATOM    1008  OG1  .  THR  A  150  ?   20.54531  -28.29436   44.05207  1.000   15.84228  O   ?  A  ?   127  1
  ATOM    1009  CG2  .  THR  A  150  ?   20.00038  -26.56318   45.64124  1.000   15.31955  C   ?  A  ?   127  1
  ATOM    1010  O    .  ASN  A  151  ?   24.95908  -30.40187   41.78430  1.000   24.35228  O   ?  A  ?   128  1
  ATOM    1011  N    .  ASN  A  151  ?   23.88294  -27.17049   42.79065  1.000   17.15430  N   ?  A  ?   128  1
  ATOM    1012  CA   .  ASN  A  151  ?   24.84751  -28.01810   42.09421  1.000   19.16160  C   ?  A  ?   128  1
  ATOM    1013  C    .  ASN  A  151  ?   24.25195  -29.39104   41.78912  1.000   20.53299  C   ?  A  ?   128  1
  ATOM    1014  CB   .  ASN  A  151  ?   26.14779  -28.15307   42.89437  1.000   18.94982  C   ?  A  ?   128  1
  ATOM    1015  CG   .  ASN  A  151  ?   27.37765  -28.14804   42.01240  1.000   21.28444  C   ?  A  ?   128  1
  ATOM    1016  OD1  .  ASN  A  151  ?   27.27583  -28.20690   40.78789  1.000   23.72208  O   ?  A  ?   128  1
  ATOM    1017  ND2  .  ASN  A  151  ?   28.55128  -28.08976   42.63202  1.000   20.24677  N   ?  A  ?   128  1
  ATOM    1018  O    .  PHE  A  152  ?   22.21614  -32.89897   41.98991  1.000   15.27306  O   ?  A  ?   129  1
  ATOM    1019  N    .  PHE  A  152  ?   22.93651  -29.42194   41.55882  1.000   17.65347  N   ?  A  ?   129  1
  ATOM    1020  CA   .  PHE  A  152  ?   22.19437  -30.63119   41.19470  1.000   13.95639  C   ?  A  ?   129  1
  ATOM    1021  C    .  PHE  A  152  ?   22.25942  -31.70143   42.27810  1.000   13.43009  C   ?  A  ?   129  1
  ATOM    1022  CB   .  PHE  A  152  ?   22.66199  -31.17993   39.84626  1.000   15.39396  C   ?  A  ?   129  1
  ATOM    1023  CG   .  PHE  A  152  ?   22.31716  -30.28085   38.69991  1.000   16.00387  C   ?  A  ?   129  1
  ATOM    1024  CD1  .  PHE  A  152  ?   21.02577  -30.24598   38.20202  1.000   15.56452  C   ?  A  ?   129  1
  ATOM    1025  CD2  .  PHE  A  152  ?   23.26767  -29.43879   38.14972  1.000   13.91360  C   ?  A  ?   129  1
  ATOM    1026  CE1  .  PHE  A  152  ?   20.69493  -29.40677   37.16101  1.000   15.29102  C   ?  A  ?   129  1
  ATOM    1027  CE2  .  PHE  A  152  ?   22.94308  -28.59479   37.10738  1.000   12.87591  C   ?  A  ?   129  1
  ATOM    1028  CZ   .  PHE  A  152  ?   21.65628  -28.58101   36.61058  1.000   14.69458  C   ?  A  ?   129  1
  ATOM    1029  N    .  THR  A  153  ?   22.35094  -31.27176   43.53225  1.000   13.06569  N   ?  A  ?   130  1
  ATOM    1030  CA   .  THR  A  153  ?   22.18013  -32.16072   44.66965  1.000   13.29980  C   ?  A  ?   130  1
  ATOM    1031  C    .  THR  A  153  ?   20.72272  -32.28735   45.09019  1.000   12.31771  C   ?  A  ?   130  1
  ATOM    1032  O    .  THR  A  153  ?   20.40672  -33.12225   45.94484  1.000   13.94211  O   ?  A  ?   130  1
  ATOM    1033  CB   .  THR  A  153  ?   23.01837  -31.66506   45.85258  1.000   14.40633  C   ?  A  ?   130  1
  ATOM    1034  OG1  .  THR  A  153  ?   22.63116  -30.32656   46.18668  1.000   14.32306  O   ?  A  ?   130  1
  ATOM    1035  CG2  .  THR  A  153  ?   24.49398  -31.67691   45.49528  1.000   16.50480  C   ?  A  ?   130  1
  ATOM    1036  N    A  SER  A  154  ?   19.83513  -31.48768   44.50935  0.680   11.44189  N   ?  A  ?   131  1
  ATOM    1037  CA   A  SER  A  154  ?   18.42425  -31.53139   44.85429  0.680   11.75064  C   ?  A  ?   131  1
  ATOM    1038  C    A  SER  A  154  ?   17.73945  -32.70550   44.16767  0.680   11.72074  C   ?  A  ?   131  1
  ATOM    1039  O    A  SER  A  154  ?   18.04642  -33.03710   43.01960  0.680   12.47386  O   ?  A  ?   131  1
  ATOM    1040  CB   A  SER  A  154  ?   17.74441  -30.22502   44.44988  0.680   11.34497  C   ?  A  ?   131  1
  ATOM    1041  OG   A  SER  A  154  ?   16.35206  -30.28632   44.69470  0.680   12.90037  O   ?  A  ?   131  1
  ATOM    1042  N    B  SER  A  154  ?   19.83554  -31.47920   44.51510  0.320   11.48042  N   ?  A  ?   131  1
  ATOM    1043  CA   B  SER  A  154  ?   18.41946  -31.53333   44.84289  0.320   11.63948  C   ?  A  ?   131  1
  ATOM    1044  C    B  SER  A  154  ?   17.76050  -32.73122   44.17667  0.320   11.66495  C   ?  A  ?   131  1
  ATOM    1045  O    B  SER  A  154  ?   18.10322  -33.10115   43.05070  0.320   12.28573  O   ?  A  ?   131  1
  ATOM    1046  CB   B  SER  A  154  ?   17.71732  -30.25109   44.39653  0.320   11.47196  C   ?  A  ?   131  1
  ATOM    1047  OG   B  SER  A  154  ?   18.09851  -29.15075   45.20011  0.320   10.84853  O   ?  A  ?   131  1
  ATOM    1048  N    .  LYS  A  155  ?   16.80590  -33.33365   44.87814  1.000   10.07138  N   ?  A  ?   132  1
  ATOM    1049  CA   .  LYS  A  155  ?   15.99592  -34.40866   44.31915  1.000    7.19110  C   ?  A  ?   132  1
  ATOM    1050  C    .  LYS  A  155  ?   14.74918  -33.79656   43.69413  1.000    7.61098  C   ?  A  ?   132  1
  ATOM    1051  O    .  LYS  A  155  ?   13.96937  -33.12950   44.38140  1.000   10.36554  O   ?  A  ?   132  1
  ATOM    1052  CB   .  LYS  A  155  ?   15.61487  -35.42747   45.39232  1.000   11.45368  C   ?  A  ?   132  1
  ATOM    1053  CG   .  LYS  A  155  ?   16.79642  -36.12160   46.04768  1.000   15.88442  C   ?  A  ?   132  1
  ATOM    1054  CD   .  LYS  A  155  ?   17.62713  -36.88949   45.02994  1.000   19.27903  C   ?  A  ?   132  1
  ATOM    1055  CE   .  LYS  A  155  ?   18.76181  -37.64869   45.70031  1.000   20.49832  C   ?  A  ?   132  1
  ATOM    1056  NZ   .  LYS  A  155  ?   18.25642  -38.69694   46.63064  1.000   21.17469  N   ?  A  ?   132  1
  ATOM    1057  N    .  VAL  A  156  ?   14.56581  -34.01343   42.39591  1.000    4.27991  N   ?  A  ?   133  1
  ATOM    1058  CA   .  VAL  A  156  ?   13.44147  -33.45009   41.65829  1.000    6.63795  C   ?  A  ?   133  1
  ATOM    1059  C    .  VAL  A  156  ?   12.72082  -34.59486   40.96394  1.000    8.27113  C   ?  A  ?   133  1
  ATOM    1060  O    .  VAL  A  156  ?   13.31322  -35.28510   40.12574  1.000    8.55384  O   ?  A  ?   133  1
  ATOM    1061  CB   .  VAL  A  156  ?   13.89183  -32.38923   40.63898  1.000    5.89694  C   ?  A  ?   133  1
  ATOM    1062  CG1  .  VAL  A  156  ?   12.71390  -31.92238   39.79915  1.000    2.34365  C   ?  A  ?   133  1
  ATOM    1063  CG2  .  VAL  A  156  ?   14.54608  -31.21290   41.34878  1.000    6.37532  C   ?  A  ?   133  1
  ATOM    1064  N    .  VAL  A  157  ?   11.45150  -34.80001   41.31348  1.000    6.32572  N   ?  A  ?   134  1
  ATOM    1065  CA   .  VAL  A  157  ?   10.66176  -35.91746   40.80367  1.000    6.52644  C   ?  A  ?   134  1
  ATOM    1066  C    .  VAL  A  157  ?    9.28743  -35.40613   40.39691  1.000    5.69595  C   ?  A  ?   134  1
  ATOM    1067  O    .  VAL  A  157  ?    8.62108  -34.71582   41.17518  1.000    5.49187  O   ?  A  ?   134  1
  ATOM    1068  CB   .  VAL  A  157  ?   10.52132  -37.04562   41.84535  1.000    7.77009  C   ?  A  ?   134  1
  ATOM    1069  CG1  .  VAL  A  157  ?    9.62271  -38.15040   41.31333  1.000   10.20466  C   ?  A  ?   134  1
  ATOM    1070  CG2  .  VAL  A  157  ?   11.88508  -37.59995   42.22240  1.000    6.56262  C   ?  A  ?   134  1
  ATOM    1071  N    .  GLY  A  158  ?    8.85853  -35.75451   39.18965  1.000    3.38448  N   ?  A  ?   135  1
  ATOM    1072  CA   .  GLY  A  158  ?    7.52882  -35.41974   38.69769  1.000    4.33069  C   ?  A  ?   135  1
  ATOM    1073  C    .  GLY  A  158  ?    6.67034  -36.66922   38.58309  1.000    6.13962  C   ?  A  ?   135  1
  ATOM    1074  O    .  GLY  A  158  ?    7.13839  -37.70987   38.11628  1.000    5.20660  O   ?  A  ?   135  1
  ATOM    1075  N    .  VAL  A  159  ?    5.41494  -36.55865   39.01862  1.000    6.42971  N   ?  A  ?   136  1
  ATOM    1076  CA   .  VAL  A  159  ?    4.47041  -37.66995   39.00047  1.000    7.53519  C   ?  A  ?   136  1
  ATOM    1077  C    .  VAL  A  159  ?    3.14281  -37.18913   38.42840  1.000    8.73445  C   ?  A  ?   136  1
  ATOM    1078  O    .  VAL  A  159  ?    2.66090  -36.10638   38.77782  1.000    8.99131  O   ?  A  ?   136  1
  ATOM    1079  CB   .  VAL  A  159  ?    4.26208  -38.27006   40.40886  1.000    9.34608  C   ?  A  ?   136  1
  ATOM    1080  CG1  .  VAL  A  159  ?    3.26724  -39.41474   40.35214  1.000    5.91794  C   ?  A  ?   136  1
  ATOM    1081  CG2  .  VAL  A  159  ?    5.58625  -38.73729   40.99937  1.000   10.58162  C   ?  A  ?   136  1
  ATOM    1082  N    .  SER  A  160  ?    2.55470  -37.99722   37.54916  1.000    9.13455  N   ?  A  ?   137  1
  ATOM    1083  CA   .  SER  A  160  ?    1.22588  -37.74429   37.00661  1.000    9.17252  C   ?  A  ?   137  1
  ATOM    1084  C    .  SER  A  160  ?    0.78145  -38.97420   36.23470  1.000    7.49762  C   ?  A  ?   137  1
  ATOM    1085  O    .  SER  A  160  ?    1.60239  -39.79585   35.82261  1.000   11.54607  O   ?  A  ?   137  1
  ATOM    1086  CB   .  SER  A  160  ?    1.19854  -36.51715   36.09177  1.000    8.35073  C   ?  A  ?   137  1
  ATOM    1087  OG   .  SER  A  160  ?   -0.06849  -36.38764   35.46662  1.000   11.44636  O   ?  A  ?   137  1
  ATOM    1088  N    .  LEU  A  161  ?   -0.53300  -39.09153   36.04390  1.000    5.28174  N   ?  A  ?   138  1
  ATOM    1089  CA   .  LEU  A  161  ?   -1.03419  -40.08279   35.10063  1.000    8.16758  C   ?  A  ?   138  1
  ATOM    1090  C    .  LEU  A  161  ?   -0.69630  -39.69403   33.66835  1.000    9.93759  C   ?  A  ?   138  1
  ATOM    1091  O    .  LEU  A  161  ?   -0.48555  -40.56989   32.82262  1.000   13.02851  O   ?  A  ?   138  1
  ATOM    1092  CB   .  LEU  A  161  ?   -2.54614  -40.25648   35.25288  1.000    7.89108  C   ?  A  ?   138  1
  ATOM    1093  CG   .  LEU  A  161  ?   -3.09157  -40.75681   36.58986  1.000    5.60741  C   ?  A  ?   138  1
  ATOM    1094  CD1  .  LEU  A  161  ?   -4.60148  -40.84064   36.53508  1.000    7.98433  C   ?  A  ?   138  1
  ATOM    1095  CD2  .  LEU  A  161  ?   -2.49172  -42.10688   36.94756  1.000    6.38323  C   ?  A  ?   138  1
  ATOM    1096  N    .  LYS  A  162  ?   -0.63987  -38.39504   33.38042  1.000   10.61165  N   ?  A  ?   139  1
  ATOM    1097  CA   .  LYS  A  162  ?   -0.36632  -37.90284   32.03758  1.000   10.00759  C   ?  A  ?   139  1
  ATOM    1098  C    .  LYS  A  162  ?    1.11950  -37.62965   31.86737  1.000    7.46858  C   ?  A  ?   139  1
  ATOM    1099  O    .  LYS  A  162  ?    1.75300  -37.02424   32.73646  1.000    6.75733  O   ?  A  ?   139  1
  ATOM    1100  CB   .  LYS  A  162  ?   -1.13524  -36.61255   31.75171  1.000   12.82241  C   ?  A  ?   139  1
  ATOM    1101  CG   .  LYS  A  162  ?   -2.62914  -36.65239   31.98774  1.000   15.03733  C   ?  A  ?   139  1
  ATOM    1102  CD   .  LYS  A  162  ?   -3.21104  -35.26293   31.75841  1.000   14.08673  C   ?  A  ?   139  1
  ATOM    1103  CE   .  LYS  A  162  ?   -4.72531  -35.25438   31.86799  1.000   16.14255  C   ?  A  ?   139  1
  ATOM    1104  NZ   .  LYS  A  162  ?   -5.30078  -33.92130   31.53036  1.000   13.76285  N   ?  A  ?   139  1
  ATOM    1105  N    .  ASP  A  163  ?    1.66257  -38.04693   30.72193  1.000    5.86716  N   ?  A  ?   140  1
  ATOM    1106  CA   .  ASP  A  163  ?    3.06711  -37.77928   30.42952  1.000    7.28077  C   ?  A  ?   140  1
  ATOM    1107  C    .  ASP  A  163  ?    3.36514  -36.28498   30.48315  1.000    9.44998  C   ?  A  ?   140  1
  ATOM    1108  O    .  ASP  A  163  ?    4.30803  -35.85334   31.15600  1.000   13.83277  O   ?  A  ?   140  1
  ATOM    1109  CB   .  ASP  A  163  ?    3.44808  -38.36495   29.06472  1.000    9.56562  C   ?  A  ?   140  1
  ATOM    1110  CG   .  ASP  A  163  ?    2.40212  -38.10294   27.99120  1.000   13.54768  C   ?  A  ?   140  1
  ATOM    1111  OD1  .  ASP  A  163  ?    1.66043  -37.10081   28.09403  1.000   17.57425  O   ?  A  ?   140  1
  ATOM    1112  OD2  .  ASP  A  163  ?    2.32595  -38.90422   27.03427  1.000   13.92182  O   ?  A  ?   140  1
  ATOM    1113  N    .  ARG  A  164  ?    2.55294  -35.47727   29.79613  1.000    6.71255  N   ?  A  ?   141  1
  ATOM    1114  CA   .  ARG  A  164  ?    2.82545  -34.04498   29.70315  1.000    9.97470  C   ?  A  ?   141  1
  ATOM    1115  C    .  ARG  A  164  ?    2.81195  -33.37520   31.07353  1.000   12.24077  C   ?  A  ?   141  1
  ATOM    1116  O    .  ARG  A  164  ?    3.60462  -32.46311   31.33437  1.000   14.26121  O   ?  A  ?   141  1
  ATOM    1117  CB   .  ARG  A  164  ?    1.81167  -33.38028   28.76946  1.000   10.12708  C   ?  A  ?   141  1
  ATOM    1118  CG   .  ARG  A  164  ?    0.34405  -33.64903   29.10316  1.000   12.79058  C   ?  A  ?   141  1
  ATOM    1119  CD   .  ARG  A  164  ?   -0.56565  -33.05671   28.03062  1.000   13.15427  C   ?  A  ?   141  1
  ATOM    1120  NE   .  ARG  A  164  ?   -1.98657  -33.29245   28.27925  1.000   14.04502  N   ?  A  ?   141  1
  ATOM    1121  CZ   .  ARG  A  164  ?   -2.65441  -34.35900   27.85210  1.000   16.40843  C   ?  A  ?   141  1
  ATOM    1122  NH1  .  ARG  A  164  ?   -2.02988  -35.30014   27.15997  1.000   19.00999  N   ?  A  ?   141  1
  ATOM    1123  NH2  .  ARG  A  164  ?   -3.94686  -34.48823   28.11883  1.000   18.62278  N   ?  A  ?   141  1
  ATOM    1124  N    .  ALA  A  165  ?    1.92768  -33.81758   31.96457  1.000   11.93713  N   ?  A  ?   142  1
  ATOM    1125  CA   .  ALA  A  165  ?    1.78457  -33.18993   33.27133  1.000    9.20978  C   ?  A  ?   142  1
  ATOM    1126  C    .  ALA  A  165  ?    2.82591  -33.65669   34.28028  1.000    7.20030  C   ?  A  ?   142  1
  ATOM    1127  O    .  ALA  A  165  ?    2.89890  -33.09087   35.37669  1.000    3.62709  O   ?  A  ?   142  1
  ATOM    1128  CB   .  ALA  A  165  ?    0.38127  -33.44845   33.81932  1.000    5.94087  C   ?  A  ?   142  1
  ATOM    1129  N    .  SER  A  166  ?    3.61671  -34.67382   33.94969  1.000    3.29613  N   ?  A  ?   143  1
  ATOM    1130  CA   .  SER  A  166  ?    4.74605  -35.08740   34.77228  1.000    3.29343  C   ?  A  ?   143  1
  ATOM    1131  C    .  SER  A  166  ?    6.06954  -34.56765   34.23331  1.000    5.95449  C   ?  A  ?   143  1
  ATOM    1132  O    .  SER  A  166  ?    6.91006  -34.08798   34.99939  1.000    6.95530  O   ?  A  ?   143  1
  ATOM    1133  CB   .  SER  A  166  ?    4.79928  -36.61668   34.86594  1.000    4.16238  C   ?  A  ?   143  1
  ATOM    1134  OG   .  SER  A  166  ?    5.96375  -37.04588   35.54688  1.000    8.11617  O   ?  A  ?   143  1
  ATOM    1135  N    .  ILE  A  167  ?    6.24222  -34.62306   32.91474  1.000    7.28624  N   ?  A  ?   144  1
  ATOM    1136  CA   .  ILE  A  167  ?    7.51460  -34.27498   32.29442  1.000    7.57482  C   ?  A  ?   144  1
  ATOM    1137  C    .  ILE  A  167  ?    7.77348  -32.77472   32.38045  1.000    7.39658  C   ?  A  ?   144  1
  ATOM    1138  O    .  ILE  A  167  ?    8.86423  -32.33843   32.76678  1.000    9.96607  O   ?  A  ?   144  1
  ATOM    1139  CB   .  ILE  A  167  ?    7.52745  -34.77129   30.83932  1.000    4.78996  C   ?  A  ?   144  1
  ATOM    1140  CG1  .  ILE  A  167  ?    7.63457  -36.29566   30.81746  1.000    4.02546  C   ?  A  ?   144  1
  ATOM    1141  CG2  .  ILE  A  167  ?    8.63841  -34.11008   30.04640  1.000    9.21349  C   ?  A  ?   144  1
  ATOM    1142  CD1  .  ILE  A  167  ?    7.37037  -36.89404   29.47848  1.000    3.40928  C   ?  A  ?   144  1
  ATOM    1143  N    .  LEU  A  168  ?    6.78457  -31.96537   32.02018  1.000    6.61609  N   ?  A  ?   145  1
  ATOM    1144  CA   .  LEU  A  168  ?    7.01007  -30.53178   31.86837  1.000    5.94518  C   ?  A  ?   145  1
  ATOM    1145  C    .  LEU  A  168  ?    7.25021  -29.82197   33.20390  1.000    4.86626  C   ?  A  ?   145  1
  ATOM    1146  O    .  LEU  A  168  ?    8.15526  -28.98066   33.28225  1.000    9.95374  O   ?  A  ?   145  1
  ATOM    1147  CB   .  LEU  A  168  ?    5.84535  -29.90818   31.09283  1.000    7.56041  C   ?  A  ?   145  1
  ATOM    1148  CG   .  LEU  A  168  ?    5.82075  -30.40716   29.64324  1.000    6.88818  C   ?  A  ?   145  1
  ATOM    1149  CD1  .  LEU  A  168  ?    4.57145  -29.96641   28.88784  1.000    9.68569  C   ?  A  ?   145  1
  ATOM    1150  CD2  .  LEU  A  168  ?    7.07980  -29.95021   28.91512  1.000    6.86467  C   ?  A  ?   145  1
  ATOM    1151  N    .  PRO  A  169  ?    6.49583  -30.11298   34.27273  1.000    4.30263  N   ?  A  ?   146  1
  ATOM    1152  CA   .  PRO  A  169  ?    6.85720  -29.52322   35.57479  1.000    4.59978  C   ?  A  ?   146  1
  ATOM    1153  C    .  PRO  A  169  ?    8.22706  -29.94818   36.08073  1.000    8.60162  C   ?  A  ?   146  1
  ATOM    1154  O    .  PRO  A  169  ?    8.90744  -29.15337   36.74215  1.000    9.41564  O   ?  A  ?   146  1
  ATOM    1155  CB   .  PRO  A  169  ?    5.74193  -30.01746   36.50652  1.000    5.04946  C   ?  A  ?   146  1
  ATOM    1156  CG   .  PRO  A  169  ?    4.59243  -30.28161   35.61901  1.000    6.39120  C   ?  A  ?   146  1
  ATOM    1157  CD   .  PRO  A  169  ?    5.18371  -30.78816   34.33506  1.000    4.90193  C   ?  A  ?   146  1
  ATOM    1158  N    .  ALA  A  170  ?    8.65302  -31.18066   35.78866  1.000    6.14381  N   ?  A  ?   147  1
  ATOM    1159  CA   .  ALA  A  170  ?    9.90957  -31.69696   36.32175  1.000    7.64311  C   ?  A  ?   147  1
  ATOM    1160  C    .  ALA  A  170  ?   11.13169  -31.02556   35.70728  1.000    7.27395  C   ?  A  ?   147  1
  ATOM    1161  O    .  ALA  A  170  ?   12.20054  -31.02798   36.32687  1.000    7.25473  O   ?  A  ?   147  1
  ATOM    1162  CB   .  ALA  A  170  ?    9.98467  -33.20941   36.11350  1.000    5.95285  C   ?  A  ?   147  1
  ATOM    1163  N    .  GLY  A  171  ?   11.00458  -30.45867   34.51465  1.000    7.35202  N   ?  A  ?   148  1
  ATOM    1164  CA   .  GLY  A  171  ?   12.09540  -29.71799   33.91698  1.000    7.21382  C   ?  A  ?   148  1
  ATOM    1165  C    .  GLY  A  171  ?   12.95852  -30.57035   33.00641  1.000    7.51522  C   ?  A  ?   148  1
  ATOM    1166  O    .  GLY  A  171  ?   12.56517  -31.63531   32.52239  1.000   12.19728  O   ?  A  ?   148  1
  ATOM    1167  N    .  HIS  A  172  ?   14.17491  -30.08041   32.77973  1.000    5.01231  N   ?  A  ?   149  1
  ATOM    1168  CA   .  HIS  A  172  ?   15.07086  -30.69111   31.80805  1.000    3.15997  C   ?  A  ?   149  1
  ATOM    1169  C    .  HIS  A  172  ?   16.03734  -31.69737   32.41910  1.000    5.13703  C   ?  A  ?   149  1
  ATOM    1170  O    .  HIS  A  172  ?   16.57992  -32.53267   31.68708  1.000    5.21224  O   ?  A  ?   149  1
  ATOM    1171  CB   .  HIS  A  172  ?   15.85810  -29.60141   31.07226  1.000    2.38738  C   ?  A  ?   149  1
  ATOM    1172  CG   .  HIS  A  172  ?   14.99944  -28.69861   30.24081  1.000    4.13886  C   ?  A  ?   149  1
  ATOM    1173  ND1  .  HIS  A  172  ?   14.40434  -27.56351   30.74790  1.000    6.29178  N   ?  A  ?   149  1
  ATOM    1174  CD2  .  HIS  A  172  ?   14.61926  -28.77466   28.94302  1.000    3.76062  C   ?  A  ?   149  1
  ATOM    1175  CE1  .  HIS  A  172  ?   13.70347  -26.97336   29.79608  1.000    7.83088  C   ?  A  ?   149  1
  ATOM    1176  NE2  .  HIS  A  172  ?   13.81597  -27.68856   28.69117  1.000    7.24620  N   ?  A  ?   149  1
  ATOM    1177  N    .  ASN  A  173  ?   16.26355  -31.65025   33.73028  1.000    9.37098  N   ?  A  ?   150  1
  ATOM    1178  CA   .  ASN  A  173  ?   17.19449  -32.58763   34.34831  1.000    9.57304  C   ?  A  ?   150  1
  ATOM    1179  C    .  ASN  A  173  ?   16.73974  -32.98202   35.75102  1.000    8.65042  C   ?  A  ?   150  1
  ATOM    1180  O    .  ASN  A  173  ?   17.45698  -32.72868   36.72700  1.000    8.10730  O   ?  A  ?   150  1
  ATOM    1181  CB   .  ASN  A  173  ?   18.59526  -31.97205   34.39598  1.000   13.77047  C   ?  A  ?   150  1
  ATOM    1182  CG   .  ASN  A  173  ?   19.65786  -32.95936   34.83814  1.000   14.53457  C   ?  A  ?   150  1
  ATOM    1183  OD1  .  ASN  A  173  ?   19.52453  -34.16628   34.63958  1.000   18.24585  O   ?  A  ?   150  1
  ATOM    1184  ND2  .  ASN  A  173  ?   20.71929  -32.44722   35.44931  1.000   15.32937  N   ?  A  ?   150  1
  ATOM    1185  N    .  PRO  A  174  ?   15.57416  -33.60286   35.90342  1.000    7.41394  N   ?  A  ?   151  1
  ATOM    1186  CA   .  PRO  A  174  ?   15.13546  -34.03225   37.23214  1.000    8.28537  C   ?  A  ?   151  1
  ATOM    1187  C    .  PRO  A  174  ?   15.76724  -35.36552   37.60682  1.000    7.47550  C   ?  A  ?   151  1
  ATOM    1188  O    .  PRO  A  174  ?   16.40012  -36.03894   36.79419  1.000    6.26510  O   ?  A  ?   151  1
  ATOM    1189  CB   .  PRO  A  174  ?   13.62257  -34.16965   37.06528  1.000   10.18214  C   ?  A  ?   151  1
  ATOM    1190  CG   .  PRO  A  174  ?   13.47662  -34.63208   35.65183  1.000    7.20394  C   ?  A  ?   151  1
  ATOM    1191  CD   .  PRO  A  174  ?   14.59119  -33.97049   34.86631  1.000   10.07399  C   ?  A  ?   151  1
  ATOM    1192  N    .  THR  A  175  ?   15.58292  -35.74259   38.87239  1.000    4.32188  N   ?  A  ?   152  1
  ATOM    1193  CA   .  THR  A  175  ?   15.94549  -37.09672   39.27359  1.000    5.26821  C   ?  A  ?   152  1
  ATOM    1194  C    .  THR  A  175  ?   15.12751  -38.11874   38.49765  1.000   10.05341  C   ?  A  ?   152  1
  ATOM    1195  O    .  THR  A  175  ?   15.64897  -39.15667   38.07658  1.000    6.74764  O   ?  A  ?   152  1
  ATOM    1196  CB   .  THR  A  175  ?   15.74191  -37.28095   40.77608  1.000    7.73465  C   ?  A  ?   152  1
  ATOM    1197  OG1  .  THR  A  175  ?   16.33887  -36.18456   41.47775  1.000    8.28808  O   ?  A  ?   152  1
  ATOM    1198  CG2  .  THR  A  175  ?   16.37504  -38.58933   41.24349  1.000   12.02394  C   ?  A  ?   152  1
  ATOM    1199  N    .  GLY  A  176  ?   13.85073  -37.82939   38.28291  1.000    9.37724  N   ?  A  ?   153  1
  ATOM    1200  CA   .  GLY  A  176  ?   12.99024  -38.71564   37.52886  1.000    8.74913  C   ?  A  ?   153  1
  ATOM    1201  C    .  GLY  A  176  ?   11.67273  -38.04352   37.22508  1.000    6.09337  C   ?  A  ?   153  1
  ATOM    1202  O    .  GLY  A  176  ?   11.26638  -37.09172   37.89743  1.000    5.79734  O   ?  A  ?   153  1
  ATOM    1203  N    .  ALA  A  177  ?   11.02139  -38.54105   36.18004  1.000    7.73512  N   ?  A  ?   154  1
  ATOM    1204  CA   .  ALA  A  177  ?    9.67849  -38.11371   35.81083  1.000    6.80002  C   ?  A  ?   154  1
  ATOM    1205  C    .  ALA  A  177  ?    8.91844  -39.35565   35.38071  1.000    9.51072  C   ?  A  ?   154  1
  ATOM    1206  O    .  ALA  A  177  ?    9.35842  -40.06309   34.47028  1.000    8.44268  O   ?  A  ?   154  1
  ATOM    1207  CB   .  ALA  A  177  ?    9.70515  -37.07117   34.68954  1.000    7.36085  C   ?  A  ?   154  1
  ATOM    1208  N    .  PHE  A  178  ?    7.79461  -39.62938   36.03675  1.000    9.76511  N   ?  A  ?   155  1
  ATOM    1209  CA   .  PHE  A  178  ?    7.06867  -40.87636   35.84417  1.000   10.83282  C   ?  A  ?   155  1
  ATOM    1210  C    .  PHE  A  178  ?    5.61932  -40.60912   35.46764  1.000    7.47964  C   ?  A  ?   155  1
  ATOM    1211  O    .  PHE  A  178  ?    4.99378  -39.67620   35.98045  1.000    6.06793  O   ?  A  ?   155  1
  ATOM    1212  CB   .  PHE  A  178  ?    7.13427  -41.73270   37.10530  1.000   12.66473  C   ?  A  ?   155  1
  ATOM    1213  CG   .  PHE  A  178  ?    8.53069  -41.95523   37.60160  1.000   11.80106  C   ?  A  ?   155  1
  ATOM    1214  CD1  .  PHE  A  178  ?    9.32798  -42.93666   37.03993  1.000    9.18915  C   ?  A  ?   155  1
  ATOM    1215  CD2  .  PHE  A  178  ?    9.05059  -41.17448   38.62057  1.000   10.05310  C   ?  A  ?   155  1
  ATOM    1216  CE1  .  PHE  A  178  ?   10.61767  -43.14094   37.49018  1.000    8.17914  C   ?  A  ?   155  1
  ATOM    1217  CE2  .  PHE  A  178  ?   10.33911  -41.37296   39.07617  1.000    6.83790  C   ?  A  ?   155  1
  ATOM    1218  CZ   .  PHE  A  178  ?   11.12298  -42.35764   38.51067  1.000    7.35363  C   ?  A  ?   155  1
  ATOM    1219  N    .  TRP  A  179  ?    5.09066  -41.43810   34.57020  1.000    5.31973  N   ?  A  ?   156  1
  ATOM    1220  CA   .  TRP  A  179  ?    3.71227  -41.31514   34.12661  1.000    8.50651  C   ?  A  ?   156  1
  ATOM    1221  C    .  TRP  A  179  ?    3.12537  -42.70410   33.90918  1.000    7.76908  C   ?  A  ?   156  1
  ATOM    1222  O    .  TRP  A  179  ?    3.83569  -43.71177   33.90638  1.000    7.34057  O   ?  A  ?   156  1
  ATOM    1223  CB   .  TRP  A  179  ?    3.59990  -40.44977   32.86350  1.000    9.46473  C   ?  A  ?   156  1
  ATOM    1224  CG   .  TRP  A  179  ?    4.45274  -40.87749   31.70284  1.000    9.30439  C   ?  A  ?   156  1
  ATOM    1225  CD1  .  TRP  A  179  ?    4.06226  -41.63476   30.63834  1.000    7.78331  C   ?  A  ?   156  1
  ATOM    1226  CD2  .  TRP  A  179  ?    5.82906  -40.54483   31.47370  1.000   10.37306  C   ?  A  ?   156  1
  ATOM    1227  CE2  .  TRP  A  179  ?    6.20695  -41.14614   30.25618  1.000   11.19386  C   ?  A  ?   156  1
  ATOM    1228  CE3  .  TRP  A  179  ?    6.77814  -39.80197   32.18071  1.000   10.43087  C   ?  A  ?   156  1
  ATOM    1229  NE1  .  TRP  A  179  ?    5.10978  -41.80312   29.76553  1.000    9.67816  N   ?  A  ?   156  1
  ATOM    1230  CZ2  .  TRP  A  179  ?    7.49360  -41.02896   29.73143  1.000    8.59162  C   ?  A  ?   156  1
  ATOM    1231  CZ3  .  TRP  A  179  ?    8.05595  -39.68951   31.65918  1.000   11.34939  C   ?  A  ?   156  1
  ATOM    1232  CH2  .  TRP  A  179  ?    8.40149  -40.29948   30.44672  1.000   10.34797  C   ?  A  ?   156  1
  ATOM    1233  N    .  PHE  A  180  ?    1.80894  -42.74078   33.71629  1.000    9.52644  N   ?  A  ?   157  1
  ATOM    1234  CA   .  PHE  A  180  ?    1.03364  -43.97274   33.78317  1.000    7.32684  C   ?  A  ?   157  1
  ATOM    1235  C    .  PHE  A  180  ?    0.93238  -44.62800   32.41123  1.000   11.98655  C   ?  A  ?   157  1
  ATOM    1236  O    .  PHE  A  180  ?    0.63844  -43.95912   31.41502  1.000   13.41481  O   ?  A  ?   157  1
  ATOM    1237  CB   .  PHE  A  180  ?   -0.36018  -43.67300   34.33716  1.000    8.47250  C   ?  A  ?   157  1
  ATOM    1238  CG   .  PHE  A  180  ?   -1.17061  -44.89469   34.65567  1.000   11.19310  C   ?  A  ?   157  1
  ATOM    1239  CD1  .  PHE  A  180  ?   -0.86610  -45.67857   35.75681  1.000   12.62535  C   ?  A  ?   157  1
  ATOM    1240  CD2  .  PHE  A  180  ?   -2.25595  -45.24343   33.86947  1.000   10.55825  C   ?  A  ?   157  1
  ATOM    1241  CE1  .  PHE  A  180  ?   -1.61834  -46.79687   36.05639  1.000   12.46182  C   ?  A  ?   157  1
  ATOM    1242  CE2  .  PHE  A  180  ?   -3.01132  -46.35873   34.16367  1.000   12.33293  C   ?  A  ?   157  1
  ATOM    1243  CZ   .  PHE  A  180  ?   -2.69367  -47.13630   35.25955  1.000   12.12133  C   ?  A  ?   157  1
  ATOM    1244  N    .  ASP  A  181  ?    1.16669  -45.94090   32.36986  1.000   11.77638  N   ?  A  ?   158  1
  ATOM    1245  CA   .  ASP  A  181  ?    1.08857  -46.72670   31.14246  1.000   13.35437  C   ?  A  ?   158  1
  ATOM    1246  C    .  ASP  A  181  ?   -0.27288  -47.41498   31.09286  1.000   13.58540  C   ?  A  ?   158  1
  ATOM    1247  O    .  ASP  A  181  ?   -0.53523  -48.34230   31.86544  1.000   12.46932  O   ?  A  ?   158  1
  ATOM    1248  CB   .  ASP  A  181  ?    2.23272  -47.73713   31.08257  1.000   13.78327  C   ?  A  ?   158  1
  ATOM    1249  CG   .  ASP  A  181  ?    2.16391  -48.64005   29.86259  1.000   15.66949  C   ?  A  ?   158  1
  ATOM    1250  OD1  .  ASP  A  181  ?    2.93361  -49.61876   29.81311  1.000   17.55419  O   ?  A  ?   158  1
  ATOM    1251  OD2  .  ASP  A  181  ?    1.34956  -48.38460   28.95339  1.000   15.87569  O   ?  A  ?   158  1
  ATOM    1252  N    .  ASP  A  182  ?   -1.13050  -46.96345   30.17110  1.000   10.96018  N   ?  A  ?   159  1
  ATOM    1253  CA   .  ASP  A  182  ?   -2.47379  -47.51956   30.03879  1.000   11.39771  C   ?  A  ?   159  1
  ATOM    1254  C    .  ASP  A  182  ?   -2.47078  -48.98997   29.64124  1.000   14.58304  C   ?  A  ?   159  1
  ATOM    1255  O    .  ASP  A  182  ?   -3.46683  -49.68372   29.87513  1.000   19.86104  O   ?  A  ?   159  1
  ATOM    1256  CB   .  ASP  A  182  ?   -3.27121  -46.71779   29.00805  1.000   12.50962  C   ?  A  ?   159  1
  ATOM    1257  CG   .  ASP  A  182  ?   -3.89694  -45.47175   29.59493  1.000   16.14777  C   ?  A  ?   159  1
  ATOM    1258  OD1  .  ASP  A  182  ?   -4.62447  -44.76831   28.86073  1.000   16.41022  O   ?  A  ?   159  1
  ATOM    1259  OD2  .  ASP  A  182  ?   -3.67307  -45.20391   30.79401  1.000   19.87659  O   ?  A  ?   159  1
  ATOM    1260  O    .  THR  A  183  ?   -1.29592  -53.04688   29.51968  1.000   18.24817  O   ?  A  ?   160  1
  ATOM    1261  N    .  THR  A  183  ?   -1.38696  -49.48131   29.04043  1.000   14.63924  N   ?  A  ?   160  1
  ATOM    1262  CA   .  THR  A  183  ?   -1.36111  -50.86015   28.57075  1.000   17.44617  C   ?  A  ?   160  1
  ATOM    1263  C    .  THR  A  183  ?   -1.00453  -51.85542   29.66726  1.000   19.68351  C   ?  A  ?   160  1
  ATOM    1264  CB   .  THR  A  183  ?   -0.37610  -51.00491   27.40533  1.000   19.56444  C   ?  A  ?   160  1
  ATOM    1265  OG1  .  THR  A  183  ?    0.95845  -50.73232   27.85486  1.000   16.92834  O   ?  A  ?   160  1
  ATOM    1266  CG2  .  THR  A  183  ?   -0.73512  -50.03725   26.28746  1.000   22.01708  C   ?  A  ?   160  1
  ATOM    1267  O    .  THR  A  184  ?   -0.25640  -52.75758   34.11241  1.000   17.04724  O   ?  A  ?   161  1
  ATOM    1268  N    .  THR  A  184  ?   -0.38579  -51.40364   30.75823  1.000   20.27386  N   ?  A  ?   161  1
  ATOM    1269  CA   .  THR  A  184  ?    0.07755  -52.30595   31.80608  1.000   16.84243  C   ?  A  ?   161  1
  ATOM    1270  C    .  THR  A  184  ?   -0.36436  -51.92080   33.20865  1.000   16.02448  C   ?  A  ?   161  1
  ATOM    1271  CB   .  THR  A  184  ?    1.61153  -52.39978   31.80061  1.000   15.49870  C   ?  A  ?   161  1
  ATOM    1272  OG1  .  THR  A  184  ?    2.16509  -51.15267   32.23427  1.000   15.57380  O   ?  A  ?   161  1
  ATOM    1273  CG2  .  THR  A  184  ?    2.13684  -52.71909   30.40598  1.000   17.44879  C   ?  A  ?   161  1
  ATOM    1274  O    .  GLY  A  185  ?   -0.11873  -49.91722   36.86285  1.000   14.18635  O   ?  A  ?   162  1
  ATOM    1275  N    .  GLY  A  185  ?   -0.84742  -50.70106   33.42901  1.000   15.79992  N   ?  A  ?   162  1
  ATOM    1276  CA   .  GLY  A  185  ?   -1.18616  -50.26817   34.76934  1.000   14.53197  C   ?  A  ?   162  1
  ATOM    1277  C    .  GLY  A  185  ?    0.00143  -49.92252   35.63417  1.000   14.39238  C   ?  A  ?   162  1
  ATOM    1278  O    .  LYS  A  186  ?    2.41891  -47.29450   34.47296  1.000    6.87118  O   ?  A  ?   163  1
  ATOM    1279  N    .  LYS  A  186  ?    1.14971  -49.63568   35.03082  1.000   15.34390  N   ?  A  ?   163  1
  ATOM    1280  CA   .  LYS  A  186  ?    2.36931  -49.33120   35.75765  1.000   13.32578  C   ?  A  ?   163  1
  ATOM    1281  C    .  LYS  A  186  ?    2.79895  -47.89783   35.48006  1.000   11.04509  C   ?  A  ?   163  1
  ATOM    1282  CB   .  LYS  A  186  ?    3.50125  -50.29048   35.36702  1.000   14.57225  C   ?  A  ?   163  1
  ATOM    1283  CG   .  LYS  A  186  ?    3.19741  -51.75354   35.63314  1.000   20.97505  C   ?  A  ?   163  1
  ATOM    1284  CD   .  LYS  A  186  ?    4.23735  -52.65174   34.98650  1.000   27.35736  C   ?  A  ?   163  1
  ATOM    1285  CE   .  LYS  A  186  ?    4.01725  -54.10879   35.36193  1.000   32.03576  C   ?  A  ?   163  1
  ATOM    1286  NZ   .  LYS  A  186  ?    4.17445  -54.33101   36.82856  1.000   33.31199  N   ?  A  ?   163  1
  ATOM    1287  O    .  PHE  A  187  ?    6.39997  -47.13199   36.01942  1.000    9.98466  O   ?  A  ?   164  1
  ATOM    1288  N    .  PHE  A  187  ?    3.60077  -47.35975   36.39411  1.000   10.81871  N   ?  A  ?   164  1
  ATOM    1289  CA   .  PHE  A  187  ?    4.25255  -46.07472   36.19257  1.000    9.15851  C   ?  A  ?   164  1
  ATOM    1290  C    .  PHE  A  187  ?    5.61200  -46.30568   35.54725  1.000    9.12063  C   ?  A  ?   164  1
  ATOM    1291  CB   .  PHE  A  187  ?    4.40298  -45.32396   37.51532  1.000    8.01085  C   ?  A  ?   164  1
  ATOM    1292  CG   .  PHE  A  187  ?    3.15489  -44.61126   37.95442  1.000    7.27445  C   ?  A  ?   164  1
  ATOM    1293  CD1  .  PHE  A  187  ?    2.26762  -45.21187   38.83173  1.000    9.88426  C   ?  A  ?   164  1
  ATOM    1294  CD2  .  PHE  A  187  ?    2.87072  -43.33699   37.48864  1.000    7.51838  C   ?  A  ?   164  1
  ATOM    1295  CE1  .  PHE  A  187  ?    1.12203  -44.55495   39.23801  1.000    7.16060  C   ?  A  ?   164  1
  ATOM    1296  CE2  .  PHE  A  187  ?    1.72806  -42.67469   37.89077  1.000    8.04226  C   ?  A  ?   164  1
  ATOM    1297  CZ   .  PHE  A  187  ?    0.85147  -43.28471   38.76498  1.000    8.56155  C   ?  A  ?   164  1
  ATOM    1298  O    .  ILE  A  188  ?    7.31000  -43.41457   33.87116  1.000    5.62443  O   ?  A  ?   165  1
  ATOM    1299  N    .  ILE  A  188  ?    5.87905  -45.57833   34.46559  1.000    8.46488  N   ?  A  ?   165  1
  ATOM    1300  CA   .  ILE  A  188  ?    7.04312  -45.79614   33.62497  1.000    8.12678  C   ?  A  ?   165  1
  ATOM    1301  C    .  ILE  A  188  ?    7.71974  -44.45294   33.35502  1.000    7.81913  C   ?  A  ?   165  1
  ATOM    1302  CB   .  ILE  A  188  ?    6.67148  -46.51320   32.31084  1.000    8.54958  C   ?  A  ?   165  1
  ATOM    1303  CG1  .  ILE  A  188  ?    5.56647  -45.75129   31.57684  1.000    7.77048  C   ?  A  ?   165  1
  ATOM    1304  CG2  .  ILE  A  188  ?    6.19484  -47.92735   32.60378  1.000    8.50414  C   ?  A  ?   165  1
  ATOM    1305  CD1  .  ILE  A  188  ?    6.06380  -44.82573   30.50024  1.000    6.80563  C   ?  A  ?   165  1
  ATOM    1306  O    .  THR  A  189  ?    9.75247  -44.43422   30.07616  1.000    6.91207  O   ?  A  ?   166  1
  ATOM    1307  N    .  THR  A  189  ?    8.76631  -44.48774   32.53685  1.000    6.20707  N   ?  A  ?   166  1
  ATOM    1308  CA   .  THR  A  189  ?    9.52004  -43.28821   32.17557  1.000    7.59555  C   ?  A  ?   166  1
  ATOM    1309  C    .  THR  A  189  ?   10.17254  -43.54001   30.81736  1.000    8.61094  C   ?  A  ?   166  1
  ATOM    1310  CB   .  THR  A  189  ?   10.52428  -42.93149   33.28832  1.000    8.91174  C   ?  A  ?   166  1
  ATOM    1311  OG1  .  THR  A  189  ?   11.12356  -41.65839   33.01168  1.000    9.18209  O   ?  A  ?   166  1
  ATOM    1312  CG2  .  THR  A  189  ?   11.60848  -43.99592   33.40448  1.000    7.86650  C   ?  A  ?   166  1
  ATOM    1313  O    .  SER  A  190  ?   13.86331  -42.38264   30.48161  1.000    8.81972  O   ?  A  ?   167  1
  ATOM    1314  N    .  SER  A  190  ?   11.19256  -42.74840   30.47881  1.000    8.99495  N   ?  A  ?   167  1
  ATOM    1315  CA   .  SER  A  190  ?   11.88509  -42.88112   29.20196  1.000    9.23907  C   ?  A  ?   167  1
  ATOM    1316  C    .  SER  A  190  ?   13.39002  -42.80384   29.42333  1.000    8.39309  C   ?  A  ?   167  1
  ATOM    1317  CB   .  SER  A  190  ?   11.44538  -41.80241   28.20046  1.000    8.60558  C   ?  A  ?   167  1
  ATOM    1318  OG   .  SER  A  190  ?   12.02974  -40.54561   28.48919  1.000    9.87498  O   ?  A  ?   167  1
  ATOM    1319  O    .  THR  A  191  ?   17.36499  -41.57371   28.71626  1.000   15.36848  O   ?  A  ?   168  1
  ATOM    1320  N    .  THR  A  191  ?   14.15064  -43.20560   28.39771  1.000    8.13196  N   ?  A  ?   168  1
  ATOM    1321  CA   .  THR  A  191  ?   15.60759  -43.15935   28.48813  1.000   10.32787  C   ?  A  ?   168  1
  ATOM    1322  C    .  THR  A  191  ?   16.15461  -41.74053   28.52796  1.000   13.53485  C   ?  A  ?   168  1
  ATOM    1323  CB   .  THR  A  191  ?   16.26617  -43.90780   27.32367  1.000    5.56029  C   ?  A  ?   168  1
  ATOM    1324  OG1  .  THR  A  191  ?   15.76050  -43.41542   26.07650  1.000    6.76677  O   ?  A  ?   168  1
  ATOM    1325  CG2  .  THR  A  191  ?   16.01346  -45.39983   27.42988  1.000    4.68508  C   ?  A  ?   168  1
  ATOM    1326  O    .  TYR  A  192  ?   17.17836  -38.49459   30.34375  1.000   10.06466  O   ?  A  ?   169  1
  ATOM    1327  N    .  TYR  A  192  ?   15.31178  -40.72047   28.33729  1.000   11.11245  N   ?  A  ?   169  1
  ATOM    1328  CA   .  TYR  A  192  ?   15.76440  -39.36361   28.61401  1.000    9.26067  C   ?  A  ?   169  1
  ATOM    1329  C    .  TYR  A  192  ?   16.23309  -39.23860   30.05539  1.000    9.41567  C   ?  A  ?   169  1
  ATOM    1330  CB   .  TYR  A  192  ?   14.65212  -38.34897   28.32864  1.000    7.10174  C   ?  A  ?   169  1
  ATOM    1331  CG   .  TYR  A  192  ?   15.08647  -36.91186   28.53664  1.000    6.55915  C   ?  A  ?   169  1
  ATOM    1332  CD1  .  TYR  A  192  ?   15.59348  -36.16059   27.48524  1.000    8.86574  C   ?  A  ?   169  1
  ATOM    1333  CD2  .  TYR  A  192  ?   14.99621  -36.31010   29.78631  1.000    8.88271  C   ?  A  ?   169  1
  ATOM    1334  CE1  .  TYR  A  192  ?   15.99722  -34.85311   27.67206  1.000    5.58293  C   ?  A  ?   169  1
  ATOM    1335  CE2  .  TYR  A  192  ?   15.40013  -35.00861   29.98346  1.000    9.17743  C   ?  A  ?   169  1
  ATOM    1336  CZ   .  TYR  A  192  ?   15.89913  -34.28313   28.92382  1.000    6.68928  C   ?  A  ?   169  1
  ATOM    1337  OH   .  TYR  A  192  ?   16.29912  -32.98161   29.11788  1.000   10.24885  O   ?  A  ?   169  1
  ATOM    1338  O    .  TYR  A  193  ?   17.87859  -40.56250   33.45805  1.000   16.09325  O   ?  A  ?   170  1
  ATOM    1339  N    .  TYR  A  193  ?   15.59785  -39.97260   30.96787  1.000   12.11683  N   ?  A  ?   170  1
  ATOM    1340  CA   .  TYR  A  193  ?   15.85776  -39.84207   32.39577  1.000   12.41472  C   ?  A  ?   170  1
  ATOM    1341  C    .  TYR  A  193  ?   16.82665  -40.90147   32.91043  1.000   15.05663  C   ?  A  ?   170  1
  ATOM    1342  CB   .  TYR  A  193  ?   14.52898  -39.89053   33.15690  1.000   12.49954  C   ?  A  ?   170  1
  ATOM    1343  CG   .  TYR  A  193  ?   13.56693  -38.82954   32.68100  1.000    8.63639  C   ?  A  ?   170  1
  ATOM    1344  CD1  .  TYR  A  193  ?   13.63136  -37.53817   33.17976  1.000    8.41349  C   ?  A  ?   170  1
  ATOM    1345  CD2  .  TYR  A  193  ?   12.61651  -39.11040   31.70810  1.000    8.05084  C   ?  A  ?   170  1
  ATOM    1346  CE1  .  TYR  A  193  ?   12.76542  -36.55969   32.73938  1.000    7.38868  C   ?  A  ?   170  1
  ATOM    1347  CE2  .  TYR  A  193  ?   11.74526  -38.13891   31.26104  1.000    4.79036  C   ?  A  ?   170  1
  ATOM    1348  CZ   .  TYR  A  193  ?   11.82544  -36.86392   31.78084  1.000    5.90868  C   ?  A  ?   170  1
  ATOM    1349  OH   .  TYR  A  193  ?   10.96456  -35.88846   31.34418  1.000    7.79024  O   ?  A  ?   170  1
  ATOM    1350  O    .  THR  A  194  ?   16.36492  -44.55688   31.45897  1.000   12.35552  O   ?  A  ?   171  1
  ATOM    1351  N    .  THR  A  194  ?   16.49316  -42.18083   32.74938  1.000   14.18173  N   ?  A  ?   171  1
  ATOM    1352  CA   .  THR  A  194  ?   17.33972  -43.26148   33.23819  1.000   14.50102  C   ?  A  ?   171  1
  ATOM    1353  C    .  THR  A  194  ?   17.28451  -44.43533   32.27159  1.000   15.43874  C   ?  A  ?   171  1
  ATOM    1354  CB   .  THR  A  194  ?   16.92343  -43.73900   34.63970  1.000   15.24151  C   ?  A  ?   171  1
  ATOM    1355  OG1  .  THR  A  194  ?   15.52730  -44.05989   34.64383  1.000   17.46415  O   ?  A  ?   171  1
  ATOM    1356  CG2  .  THR  A  194  ?   17.20512  -42.67500   35.69702  1.000   15.49437  C   ?  A  ?   171  1
  ATOM    1357  O    .  LYS  A  195  ?   16.77694  -48.32861   31.25585  1.000   13.01049  O   ?  A  ?   172  1
  ATOM    1358  N    .  LYS  A  195  ?   18.29055  -45.30879   32.37780  1.000   13.89568  N   ?  A  ?   172  1
  ATOM    1359  CA   .  LYS  A  195  ?   18.31294  -46.52010   31.56481  1.000   15.91671  C   ?  A  ?   172  1
  ATOM    1360  C    .  LYS  A  195  ?   17.30127  -47.54593   32.05603  1.000   12.83107  C   ?  A  ?   172  1
  ATOM    1361  CB   .  LYS  A  195  ?   19.71764  -47.12719   31.55826  1.000   20.27853  C   ?  A  ?   172  1
  ATOM    1362  CG   .  LYS  A  195  ?   20.65556  -46.48643   30.55302  1.000   24.95645  C   ?  A  ?   172  1
  ATOM    1363  CD   .  LYS  A  195  ?   22.09151  -46.97193   30.69749  1.000   28.94959  C   ?  A  ?   172  1
  ATOM    1364  CE   .  LYS  A  195  ?   23.01659  -46.16009   29.79456  1.000   32.38416  C   ?  A  ?   172  1
  ATOM    1365  NZ   .  LYS  A  195  ?   24.37575  -46.75463   29.64889  1.000   33.65347  N   ?  A  ?   172  1
  ATOM    1366  O    .  GLU  A  196  ?   15.65368  -46.82528   35.57283  1.000   12.67602  O   ?  A  ?   173  1
  ATOM    1367  N    .  GLU  A  196  ?   17.02036  -47.56290   33.35832  1.000   12.98891  N   ?  A  ?   173  1
  ATOM    1368  CA   .  GLU  A  196  ?   16.12237  -48.54040   33.95467  1.000   15.32865  C   ?  A  ?   173  1
  ATOM    1369  C    .  GLU  A  196  ?   15.28107  -47.86589   35.02765  1.000   11.63477  C   ?  A  ?   173  1
  ATOM    1370  CB   .  GLU  A  196  ?   16.89789  -49.71886   34.56017  1.000   21.42086  C   ?  A  ?   173  1
  ATOM    1371  CG   .  GLU  A  196  ?   17.87308  -50.36667   33.59392  1.000   27.50230  C   ?  A  ?   173  1
  ATOM    1372  CD   .  GLU  A  196  ?   18.58212  -51.56810   34.17648  1.000   32.84329  C   ?  A  ?   173  1
  ATOM    1373  OE1  .  GLU  A  196  ?   18.20361  -52.01517   35.27967  1.000   34.07379  O   ?  A  ?   173  1
  ATOM    1374  OE2  .  GLU  A  196  ?   19.52237  -52.06730   33.52374  1.000   35.59008  O   ?  A  ?   173  1
  ATOM    1375  O    .  LEU  A  197  ?   14.66027  -49.23233   37.94083  1.000   10.58320  O   ?  A  ?   174  1
  ATOM    1376  N    .  LEU  A  197  ?   14.13629  -48.47445   35.32559  1.000    8.43889  N   ?  A  ?   174  1
  ATOM    1377  CA   .  LEU  A  197  ?   13.30144  -47.98512   36.41062  1.000    6.05047  C   ?  A  ?   174  1
  ATOM    1378  C    .  LEU  A  197  ?   14.00474  -48.20458   37.74628  1.000    6.79469  C   ?  A  ?   174  1
  ATOM    1379  CB   .  LEU  A  197  ?   11.94758  -48.69539   36.42548  1.000    9.50083  C   ?  A  ?   174  1
  ATOM    1380  CG   .  LEU  A  197  ?   10.85840  -48.21188   35.46871  1.000    5.39671  C   ?  A  ?   174  1
  ATOM    1381  CD1  .  LEU  A  197  ?   10.59374  -46.73982   35.68547  1.000    8.20866  C   ?  A  ?   174  1
  ATOM    1382  CD2  .  LEU  A  197  ?    9.58287  -49.01725   35.66223  1.000    8.16503  C   ?  A  ?   174  1
  ATOM    1383  O    .  PRO  A  198  ?   12.60662  -48.99268   40.37518  1.000   12.55901  O   ?  A  ?   175  1
  ATOM    1384  N    .  PRO  A  198  ?   13.89177  -47.26518   38.67991  1.000    9.34953  N   ?  A  ?   175  1
  ATOM    1385  CA   .  PRO  A  198  ?   14.45189  -47.48746   40.01472  1.000   12.06164  C   ?  A  ?   175  1
  ATOM    1386  C    .  PRO  A  198  ?   13.73402  -48.62745   40.71590  1.000   14.05942  C   ?  A  ?   175  1
  ATOM    1387  CB   .  PRO  A  198  ?   14.21033  -46.15701   40.73903  1.000   10.17229  C   ?  A  ?   175  1
  ATOM    1388  CG   .  PRO  A  198  ?   13.88464  -45.17162   39.66691  1.000   11.32120  C   ?  A  ?   175  1
  ATOM    1389  CD   .  PRO  A  198  ?   13.24388  -45.94926   38.56455  1.000    7.95698  C   ?  A  ?   175  1
  ATOM    1390  O    .  LYS  A  199  ?   11.54582  -50.65231   43.15094  1.000    9.15864  O   ?  A  ?   176  1
  ATOM    1391  N    .  LYS  A  199  ?   14.41061  -49.18818   41.72111  1.000   16.83548  N   ?  A  ?   176  1
  ATOM    1392  CA   .  LYS  A  199  ?   13.82076  -50.28533   42.48097  1.000   16.58232  C   ?  A  ?   176  1
  ATOM    1393  C    .  LYS  A  199  ?   12.50253  -49.86861   43.11953  1.000   12.80097  C   ?  A  ?   176  1
  ATOM    1394  CB   .  LYS  A  199  ?   14.79999  -50.77602   43.54854  1.000   19.97841  C   ?  A  ?   176  1
  ATOM    1395  CG   .  LYS  A  199  ?   14.23757  -51.86578   44.45664  1.000   25.35132  C   ?  A  ?   176  1
  ATOM    1396  CD   .  LYS  A  199  ?   15.12159  -52.07990   45.67630  1.000   29.94449  C   ?  A  ?   176  1
  ATOM    1397  CE   .  LYS  A  199  ?   14.38233  -52.81502   46.78999  1.000   32.92562  C   ?  A  ?   176  1
  ATOM    1398  NZ   .  LYS  A  199  ?   14.29363  -54.28450   46.56702  1.000   35.42117  N   ?  A  ?   176  1
  ATOM    1399  O    .  TRP  A  200  ?    8.87926  -48.16059   43.83059  1.000   13.99361  O   ?  A  ?   177  1
  ATOM    1400  N    .  TRP  A  200  ?   12.42553  -48.63226   43.62192  1.000   13.36738  N   ?  A  ?   177  1
  ATOM    1401  CA   .  TRP  A  200  ?   11.21582  -48.19994   44.31236  1.000   12.21707  C   ?  A  ?   177  1
  ATOM    1402  C    .  TRP  A  200  ?   10.02238  -48.07155   43.37155  1.000   11.74135  C   ?  A  ?   177  1
  ATOM    1403  CB   .  TRP  A  200  ?   11.46316  -46.87959   45.05540  1.000   13.05607  C   ?  A  ?   177  1
  ATOM    1404  CG   .  TRP  A  200  ?   11.64255  -45.66984   44.18159  1.000   11.64299  C   ?  A  ?   177  1
  ATOM    1405  CD1  .  TRP  A  200  ?   12.82358  -45.12314   43.76756  1.000   13.48202  C   ?  A  ?   177  1
  ATOM    1406  CD2  .  TRP  A  200  ?   10.60583  -44.84363   43.63656  1.000   12.65666  C   ?  A  ?   177  1
  ATOM    1407  NE1  .  TRP  A  200  ?   12.58504  -44.01410   42.98983  1.000   12.46767  N   ?  A  ?   177  1
  ATOM    1408  CE2  .  TRP  A  200  ?   11.23154  -43.82207   42.89462  1.000   10.59512  C   ?  A  ?   177  1
  ATOM    1409  CE3  .  TRP  A  200  ?    9.20853  -44.87259   43.69953  1.000   11.40364  C   ?  A  ?   177  1
  ATOM    1410  CZ2  .  TRP  A  200  ?   10.50800  -42.83821   42.22127  1.000   10.34814  C   ?  A  ?   177  1
  ATOM    1411  CZ3  .  TRP  A  200  ?    8.49274  -43.89701   43.03075  1.000   10.22852  C   ?  A  ?   177  1
  ATOM    1412  CH2  .  TRP  A  200  ?    9.14334  -42.89389   42.29987  1.000    7.94188  C   ?  A  ?   177  1
  ATOM    1413  O    .  VAL  A  201  ?    7.46747  -49.53621   40.77961  1.000   11.19106  O   ?  A  ?   178  1
  ATOM    1414  N    .  VAL  A  201  ?   10.25343  -47.87892   42.07243  1.000    9.89002  N   ?  A  ?   178  1
  ATOM    1415  CA   .  VAL  A  201  ?    9.14295  -47.84694   41.12503  1.000   11.24890  C   ?  A  ?   178  1
  ATOM    1416  C    .  VAL  A  201  ?    8.67283  -49.25975   40.80618  1.000   11.28958  C   ?  A  ?   178  1
  ATOM    1417  CB   .  VAL  A  201  ?    9.53864  -47.08315   39.84780  1.000    7.90192  C   ?  A  ?   178  1
  ATOM    1418  CG1  .  VAL  A  201  ?    8.35714  -46.99635   38.90016  1.000    6.89339  C   ?  A  ?   178  1
  ATOM    1419  CG2  .  VAL  A  201  ?   10.03731  -45.69464   40.19423  1.000    7.90045  C   ?  A  ?   178  1
  ATOM    1420  O    .  ASN  A  202  ?    7.51955  -52.82718   41.42926  1.000   11.61355  O   ?  A  ?   179  1
  ATOM    1421  N    .  ASN  A  202  ?    9.61878  -50.17110   40.55367  1.000   11.57979  N   ?  A  ?   179  1
  ATOM    1422  CA   .  ASN  A  202  ?    9.26461  -51.57358   40.36190  1.000    9.65653  C   ?  A  ?   179  1
  ATOM    1423  C    .  ASN  A  202  ?    8.51805  -52.11285   41.57300  1.000   11.54764  C   ?  A  ?   179  1
  ATOM    1424  CB   .  ASN  A  202  ?   10.51926  -52.40880   40.09713  1.000    9.69535  C   ?  A  ?   179  1
  ATOM    1425  CG   .  ASN  A  202  ?   11.25337  -51.98531   38.84161  1.000   12.76706  C   ?  A  ?   179  1
  ATOM    1426  OD1  .  ASN  A  202  ?   10.65255  -51.46858   37.90093  1.000   12.29918  O   ?  A  ?   179  1
  ATOM    1427  ND2  .  ASN  A  202  ?   12.56341  -52.21158   38.81786  1.000   12.75981  N   ?  A  ?   179  1
  ATOM    1428  O    .  ASP  A  203  ?    5.94218  -52.42184   44.37934  1.000   11.57149  O   ?  A  ?   180  1
  ATOM    1429  N    .  ASP  A  203  ?    8.98300  -51.76797   42.77641  1.000   10.37292  N   ?  A  ?   180  1
  ATOM    1430  CA   .  ASP  A  203  ?    8.30112  -52.19909   43.99171  1.000   11.91904  C   ?  A  ?   180  1
  ATOM    1431  C    .  ASP  A  203  ?    6.86941  -51.68173   44.03373  1.000   12.43946  C   ?  A  ?   180  1
  ATOM    1432  CB   .  ASP  A  203  ?    9.06920  -51.72795   45.22655  1.000   15.83941  C   ?  A  ?   180  1
  ATOM    1433  CG   .  ASP  A  203  ?   10.37154  -52.47337   45.42568  1.000   17.14486  C   ?  A  ?   180  1
  ATOM    1434  OD1  .  ASP  A  203  ?   10.62312  -53.44071   44.68019  1.000   16.24664  O   ?  A  ?   180  1
  ATOM    1435  OD2  .  ASP  A  203  ?   11.13907  -52.09513   46.33523  1.000   17.62339  O   ?  A  ?   180  1
  ATOM    1436  O    .  PHE  A  204  ?    3.28986  -50.86163   42.97558  1.000   11.56609  O   ?  A  ?   181  1
  ATOM    1437  N    .  PHE  A  204  ?    6.67022  -50.40445   43.69586  1.000   10.43082  N   ?  A  ?   181  1
  ATOM    1438  CA   .  PHE  A  204  ?    5.32529  -49.83893   43.73131  1.000   10.01884  C   ?  A  ?   181  1
  ATOM    1439  C    .  PHE  A  204  ?    4.43222  -50.48905   42.68509  1.000   11.44436  C   ?  A  ?   181  1
  ATOM    1440  CB   .  PHE  A  204  ?    5.37006  -48.32473   43.52064  1.000   11.76447  C   ?  A  ?   181  1
  ATOM    1441  CG   .  PHE  A  204  ?    4.01080  -47.67859   43.51717  1.000   10.19629  C   ?  A  ?   181  1
  ATOM    1442  CD1  .  PHE  A  204  ?    3.41337  -47.28684   44.70251  1.000    8.06028  C   ?  A  ?   181  1
  ATOM    1443  CD2  .  PHE  A  204  ?    3.32598  -47.47241   42.32987  1.000   10.02146  C   ?  A  ?   181  1
  ATOM    1444  CE1  .  PHE  A  204  ?    2.16534  -46.69851   44.70371  1.000    5.05245  C   ?  A  ?   181  1
  ATOM    1445  CE2  .  PHE  A  204  ?    2.07920  -46.88878   42.32775  1.000    7.80642  C   ?  A  ?   181  1
  ATOM    1446  CZ   .  PHE  A  204  ?    1.49793  -46.49974   43.51455  1.000    8.31106  C   ?  A  ?   181  1
  ATOM    1447  O    .  ASN  A  205  ?    2.56815  -53.01330   40.42930  1.000   11.48619  O   ?  A  ?   182  1
  ATOM    1448  N    .  ASN  A  205  ?    4.93644  -50.62083   41.45569  1.000   10.79560  N   ?  A  ?   182  1
  ATOM    1449  CA   .  ASN  A  205  ?    4.13919  -51.20222   40.38103  1.000   10.28867  C   ?  A  ?   182  1
  ATOM    1450  C    .  ASN  A  205  ?    3.70404  -52.61940   40.71657  1.000   10.80888  C   ?  A  ?   182  1
  ATOM    1451  CB   .  ASN  A  205  ?    4.93096  -51.19817   39.07712  1.000   11.51444  C   ?  A  ?   182  1
  ATOM    1452  CG   .  ASN  A  205  ?    5.00109  -49.83160   38.44412  1.000    9.86599  C   ?  A  ?   182  1
  ATOM    1453  OD1  .  ASN  A  205  ?    4.11882  -48.99607   38.64144  1.000    9.29779  O   ?  A  ?   182  1
  ATOM    1454  ND2  .  ASN  A  205  ?    6.05006  -49.59695   37.66562  1.000    9.63541  N   ?  A  ?   182  1
  ATOM    1455  O    .  ASN  A  206  ?    2.64755  -56.05473   42.78589  1.000   16.40063  O   ?  A  ?   183  1
  ATOM    1456  N    .  ASN  A  206  ?    4.59479  -53.39926   41.32913  1.000   11.37123  N   ?  A  ?   183  1
  ATOM    1457  CA   .  ASN  A  206  ?    4.29513  -54.79583   41.61249  1.000   12.62782  C   ?  A  ?   183  1
  ATOM    1458  C    .  ASN  A  206  ?    3.20645  -54.96043   42.66361  1.000   13.56799  C   ?  A  ?   183  1
  ATOM    1459  CB   .  ASN  A  206  ?    5.56593  -55.52298   42.04641  1.000   11.71675  C   ?  A  ?   183  1
  ATOM    1460  CG   .  ASN  A  206  ?    6.56178  -55.66821   40.91510  1.000   12.88661  C   ?  A  ?   183  1
  ATOM    1461  OD1  .  ASN  A  206  ?    6.20803  -55.54737   39.74258  1.000   12.83921  O   ?  A  ?   183  1
  ATOM    1462  ND2  .  ASN  A  206  ?    7.81264  -55.93544   41.25930  1.000   17.68653  N   ?  A  ?   183  1
  ATOM    1463  O    .  LYS  A  207  ?   -0.55291  -54.49983   44.25748  1.000   14.90839  O   ?  A  ?   184  1
  ATOM    1464  N    .  LYS  A  207  ?    2.88569  -53.90644   43.41817  1.000   11.40745  N   ?  A  ?   184  1
  ATOM    1465  CA   .  LYS  A  207  ?    1.77264  -53.98938   44.35712  1.000   12.87449  C   ?  A  ?   184  1
  ATOM    1466  C    .  LYS  A  207  ?    0.42455  -54.04546   43.65389  1.000   12.65120  C   ?  A  ?   184  1
  ATOM    1467  CB   .  LYS  A  207  ?    1.78435  -52.79985   45.31857  1.000   10.98932  C   ?  A  ?   184  1
  ATOM    1468  CG   .  LYS  A  207  ?    2.93755  -52.79501   46.29984  1.000   13.66945  C   ?  A  ?   184  1
  ATOM    1469  CD   .  LYS  A  207  ?    2.61006  -51.95962   47.53032  1.000   17.50724  C   ?  A  ?   184  1
  ATOM    1470  CE   .  LYS  A  207  ?    2.27138  -50.51998   47.17690  1.000   21.75765  C   ?  A  ?   184  1
  ATOM    1471  NZ   .  LYS  A  207  ?    2.00708  -49.71541   48.40504  1.000   24.97136  N   ?  A  ?   184  1
  ATOM    1472  N    .  ASN  A  208  ?    0.35684  -53.59986   42.39987  1.000   10.86585  N   ?  A  ?   185  1
  ATOM    1473  CA   .  ASN  A  208  ?   -0.89928  -53.46352   41.66547  1.000   12.26293  C   ?  A  ?   185  1
  ATOM    1474  C    .  ASN  A  208  ?   -1.90632  -52.64360   42.46908  1.000   11.72539  C   ?  A  ?   185  1
  ATOM    1475  O    .  ASN  A  208  ?   -3.03267  -53.07036   42.73547  1.000    9.95114  O   ?  A  ?   185  1
  ATOM    1476  CB   .  ASN  A  208  ?   -1.47166  -54.82790   41.28374  1.000   14.00345  C   ?  A  ?   185  1
  ATOM    1477  CG   .  ASN  A  208  ?   -2.44158  -54.74100   40.12947  1.000   15.80947  C   ?  A  ?   185  1
  ATOM    1478  OD1  .  ASN  A  208  ?   -2.80773  -53.64639   39.69641  1.000   16.26361  O   ?  A  ?   185  1
  ATOM    1479  ND2  .  ASN  A  208  ?   -2.87630  -55.89305   39.62936  1.000   16.20543  N   ?  A  ?   185  1
  ATOM    1480  N    .  VAL  A  209  ?   -1.46991  -51.44750   42.87254  1.000   11.38811  N   ?  A  ?   186  1
  ATOM    1481  CA   .  VAL  A  209  ?   -2.37450  -50.50675   43.53772  1.000   13.17678  C   ?  A  ?   186  1
  ATOM    1482  C    .  VAL  A  209  ?   -3.61319  -50.21526   42.69776  1.000   10.38359  C   ?  A  ?   186  1
  ATOM    1483  O    .  VAL  A  209  ?   -4.71014  -50.13424   43.26831  1.000    8.54414  O   ?  A  ?   186  1
  ATOM    1484  CB   .  VAL  A  209  ?   -1.61807  -49.24144   43.94720  1.000   13.03977  C   ?  A  ?   186  1
  ATOM    1485  CG1  .  VAL  A  209  ?   -2.56247  -48.23249   44.59176  1.000    9.95717  C   ?  A  ?   186  1
  ATOM    1486  CG2  .  VAL  A  209  ?   -0.48186  -49.59077   44.89363  1.000   14.40747  C   ?  A  ?   186  1
  ATOM    1487  N    .  PRO  A  210  ?   -3.52906  -50.02830   41.37090  1.000    9.70018  N   ?  A  ?   187  1
  ATOM    1488  CA   .  PRO  A  210  ?   -4.76415  -49.75678   40.61488  1.000   11.11231  C   ?  A  ?   187  1
  ATOM    1489  C    .  PRO  A  210  ?   -5.83436  -50.82071   40.79659  1.000   13.82003  C   ?  A  ?   187  1
  ATOM    1490  O    .  PRO  A  210  ?   -7.00760  -50.48038   40.98482  1.000   14.43644  O   ?  A  ?   187  1
  ATOM    1491  CB   .  PRO  A  210  ?   -4.27053  -49.68247   39.16544  1.000    7.34441  C   ?  A  ?   187  1
  ATOM    1492  CG   .  PRO  A  210  ?   -2.86057  -49.25780   39.26859  1.000    7.48424  C   ?  A  ?   187  1
  ATOM    1493  CD   .  PRO  A  210  ?   -2.33555  -49.90884   40.50981  1.000    9.34470  C   ?  A  ?   187  1
  ATOM    1494  N    .  ALA  A  211  ?   -5.45648  -52.10140   40.76167  1.000   12.73045  N   ?  A  ?   188  1
  ATOM    1495  CA   .  ALA  A  211  ?   -6.42594  -53.17418   40.96416  1.000   14.37912  C   ?  A  ?   188  1
  ATOM    1496  C    .  ALA  A  211  ?   -7.09398  -53.07469   42.32655  1.000   12.09810  C   ?  A  ?   188  1
  ATOM    1497  O    .  ALA  A  211  ?   -8.30864  -53.27145   42.44548  1.000   13.19057  O   ?  A  ?   188  1
  ATOM    1498  CB   .  ALA  A  211  ?   -5.74339  -54.53043   40.82306  1.000   15.94295  C   ?  A  ?   188  1
  ATOM    1499  N    A  GLN  A  212  ?   -6.30885  -52.78876   43.36877  0.500   12.98155  N   ?  A  ?   189  1
  ATOM    1500  CA   A  GLN  A  212  ?   -6.86634  -52.65888   44.71050  0.500   14.04752  C   ?  A  ?   189  1
  ATOM    1501  C    A  GLN  A  212  ?   -7.89249  -51.53607   44.77698  0.500   15.28055  C   ?  A  ?   189  1
  ATOM    1502  O    A  GLN  A  212  ?   -8.92752  -51.66900   45.44061  0.500   14.41454  O   ?  A  ?   189  1
  ATOM    1503  CB   A  GLN  A  212  ?   -5.74954  -52.40673   45.72552  0.500   15.43315  C   ?  A  ?   189  1
  ATOM    1504  CG   A  GLN  A  212  ?   -5.05846  -53.65462   46.26288  0.500   16.29575  C   ?  A  ?   189  1
  ATOM    1505  CD   A  GLN  A  212  ?   -3.97640  -54.18021   45.34169  0.500   14.78377  C   ?  A  ?   189  1
  ATOM    1506  OE1  A  GLN  A  212  ?   -4.24897  -54.95128   44.42217  0.500   14.04331  O   ?  A  ?   189  1
  ATOM    1507  NE2  A  GLN  A  212  ?   -2.73736  -53.77385   45.59100  0.500   14.02837  N   ?  A  ?   189  1
  ATOM    1508  N    B  GLN  A  212  ?   -6.31905  -52.77787   43.37121  0.500   12.96328  N   ?  A  ?   189  1
  ATOM    1509  CA   B  GLN  A  212  ?   -6.89754  -52.66802   44.70632  0.500   14.05040  C   ?  A  ?   189  1
  ATOM    1510  C    B  GLN  A  212  ?   -7.90276  -51.52803   44.78182  0.500   15.28734  C   ?  A  ?   189  1
  ATOM    1511  O    B  GLN  A  212  ?   -8.93228  -51.64007   45.45840  0.500   14.37870  O   ?  A  ?   189  1
  ATOM    1512  CB   B  GLN  A  212  ?   -5.79277  -52.46751   45.74174  0.500   15.40704  C   ?  A  ?   189  1
  ATOM    1513  CG   B  GLN  A  212  ?   -6.20096  -51.60074   46.92427  0.500   18.01148  C   ?  A  ?   189  1
  ATOM    1514  CD   B  GLN  A  212  ?   -6.25280  -52.37264   48.22360  0.500   23.51321  C   ?  A  ?   189  1
  ATOM    1515  OE1  B  GLN  A  212  ?   -5.95143  -53.56528   48.26234  0.500   27.55603  O   ?  A  ?   189  1
  ATOM    1516  NE2  B  GLN  A  212  ?   -6.63485  -51.69490   49.29944  0.500   24.95024  N   ?  A  ?   189  1
  ATOM    1517  N    .  LEU  A  213  ?   -7.62457  -50.42312   44.08840  1.000   15.43211  N   ?  A  ?   190  1
  ATOM    1518  CA   .  LEU  A  213  ?   -8.46858  -49.24110   44.22372  1.000   13.45637  C   ?  A  ?   190  1
  ATOM    1519  C    .  LEU  A  213  ?   -9.83205  -49.43180   43.57018  1.000   11.68682  C   ?  A  ?   190  1
  ATOM    1520  O    .  LEU  A  213  ?  -10.84927  -48.99939   44.12174  1.000   14.49576  O   ?  A  ?   190  1
  ATOM    1521  CB   .  LEU  A  213  ?   -7.75740  -48.02364   43.63587  1.000   10.99872  C   ?  A  ?   190  1
  ATOM    1522  CG   .  LEU  A  213  ?   -6.49801  -47.58157   44.38183  1.000   15.03597  C   ?  A  ?   190  1
  ATOM    1523  CD1  .  LEU  A  213  ?   -5.88744  -46.35267   43.72365  1.000   16.08333  C   ?  A  ?   190  1
  ATOM    1524  CD2  .  LEU  A  213  ?   -6.80483  -47.31236   45.84616  1.000   17.20945  C   ?  A  ?   190  1
  ATOM    1525  N    .  VAL  A  214  ?   -9.88065  -50.06804   42.40074  1.000    9.99094  N   ?  A  ?   191  1
  ATOM    1526  CA   .  VAL  A  214  ?  -11.12807  -50.16641   41.64719  1.000    9.99078  C   ?  A  ?   191  1
  ATOM    1527  C    .  VAL  A  214  ?  -11.88179  -51.44452   41.99406  1.000   14.57300  C   ?  A  ?   191  1
  ATOM    1528  O    .  VAL  A  214  ?  -12.91313  -51.74818   41.38390  1.000   16.61453  O   ?  A  ?   191  1
  ATOM    1529  CB   .  VAL  A  214  ?  -10.86808  -50.09455   40.13104  1.000   11.00396  C   ?  A  ?   191  1
  ATOM    1530  CG1  .  VAL  A  214  ?  -10.05493  -48.85790   39.78869  1.000   11.71862  C   ?  A  ?   191  1
  ATOM    1531  CG2  .  VAL  A  214  ?  -10.16995  -51.35432   39.64831  1.000   12.14409  C   ?  A  ?   191  1
  ATOM    1532  N    .  ALA  A  215  ?  -11.38734  -52.19110   42.98484  1.000   12.84801  N   ?  A  ?   192  1
  ATOM    1533  CA   .  ALA  A  215  ?  -11.93567  -53.51774   43.25558  1.000   17.31879  C   ?  A  ?   192  1
  ATOM    1534  C    .  ALA  A  215  ?  -13.40735  -53.45763   43.65472  1.000   18.88595  C   ?  A  ?   192  1
  ATOM    1535  O    .  ALA  A  215  ?  -14.19240  -54.33894   43.28555  1.000   22.38867  O   ?  A  ?   192  1
  ATOM    1536  CB   .  ALA  A  215  ?  -11.11299  -54.21139   44.34038  1.000   14.61590  C   ?  A  ?   192  1
  ATOM    1537  O    .  ASN  A  216  ?  -17.09586  -50.96042   44.55611  1.000   18.62599  O   ?  A  ?   193  1
  ATOM    1538  N    .  ASN  A  216  ?  -13.80533  -52.42757   44.40069  1.000   19.43036  N   ?  A  ?   193  1
  ATOM    1539  CA   .  ASN  A  216  ?  -15.16541  -52.32119   44.91360  1.000   19.41729  C   ?  A  ?   193  1
  ATOM    1540  C    .  ASN  A  216  ?  -16.04863  -51.40588   44.07518  1.000   17.65329  C   ?  A  ?   193  1
  ATOM    1541  CB   .  ASN  A  216  ?  -15.14571  -51.83832   46.36204  1.000   23.82745  C   ?  A  ?   193  1
  ATOM    1542  CG   .  ASN  A  216  ?  -14.72595  -52.91985   47.32346  1.000   30.97958  C   ?  A  ?   193  1
  ATOM    1543  OD1  .  ASN  A  216  ?  -15.04717  -54.09173   47.13135  1.000   34.56632  O   ?  A  ?   193  1
  ATOM    1544  ND2  .  ASN  A  216  ?  -14.00499  -52.53618   48.36843  1.000   31.73364  N   ?  A  ?   193  1
  ATOM    1545  O    .  GLY  A  217  ?  -15.39159  -48.39308   43.18200  1.000   14.21982  O   ?  A  ?   194  1
  ATOM    1546  N    .  GLY  A  217  ?  -15.65694  -51.12282   42.83615  1.000   13.65523  N   ?  A  ?   194  1
  ATOM    1547  CA   .  GLY  A  217  ?  -16.44712  -50.22870   42.01555  1.000   13.11442  C   ?  A  ?   194  1
  ATOM    1548  C    .  GLY  A  217  ?  -16.31809  -48.77957   42.46544  1.000   13.89887  C   ?  A  ?   194  1
  ATOM    1549  O    .  TRP  A  218  ?  -19.66838  -46.14702   42.02619  1.000   10.61917  O   ?  A  ?   195  1
  ATOM    1550  N    .  TRP  A  218  ?  -17.27731  -47.96739   42.02372  1.000   12.40662  N   ?  A  ?   195  1
  ATOM    1551  CA   .  TRP  A  218  ?  -17.33005  -46.55195   42.37793  1.000   11.15621  C   ?  A  ?   195  1
  ATOM    1552  C    .  TRP  A  218  ?  -18.74100  -46.21457   42.83885  1.000    9.75391  C   ?  A  ?   195  1
  ATOM    1553  CB   .  TRP  A  218  ?  -16.90684  -45.66259   41.20556  1.000   10.73885  C   ?  A  ?   195  1
  ATOM    1554  CG   .  TRP  A  218  ?  -16.90832  -44.18398   41.51768  1.000   10.00097  C   ?  A  ?   195  1
  ATOM    1555  CD1  .  TRP  A  218  ?  -17.00005  -43.59645   42.75029  1.000    5.40137  C   ?  A  ?   195  1
  ATOM    1556  CD2  .  TRP  A  218  ?  -16.81719  -43.11267   40.57151  1.000    9.87545  C   ?  A  ?   195  1
  ATOM    1557  NE1  .  TRP  A  218  ?  -16.97278  -42.22726   42.62601  1.000    9.02087  N   ?  A  ?   195  1
  ATOM    1558  CE2  .  TRP  A  218  ?  -16.86092  -41.90545   41.29856  1.000    9.24621  C   ?  A  ?   195  1
  ATOM    1559  CE3  .  TRP  A  218  ?  -16.70169  -43.05787   39.17935  1.000    9.55267  C   ?  A  ?   195  1
  ATOM    1560  CZ2  .  TRP  A  218  ?  -16.79435  -40.65892   40.67903  1.000    9.04778  C   ?  A  ?   195  1
  ATOM    1561  CZ3  .  TRP  A  218  ?  -16.63298  -41.82166   38.56731  1.000   11.81431  C   ?  A  ?   195  1
  ATOM    1562  CH2  .  TRP  A  218  ?  -16.67776  -40.63873   39.31572  1.000   12.04868  C   ?  A  ?   195  1
  ATOM    1563  O    .  ASN  A  219  ?  -18.52166  -43.80237   45.58564  1.000   14.09367  O   ?  A  ?   196  1
  ATOM    1564  N    .  ASN  A  219  ?  -18.89467  -46.02933   44.14323  1.000   10.99124  N   ?  A  ?   196  1
  ATOM    1565  CA   .  ASN  A  219  ?  -20.07145  -45.43986   44.75609  1.000   11.85790  C   ?  A  ?   196  1
  ATOM    1566  C    .  ASN  A  219  ?  -19.69409  -44.07858   45.32124  1.000   10.58758  C   ?  A  ?   196  1
  ATOM    1567  CB   .  ASN  A  219  ?  -20.62037  -46.33321   45.87354  1.000   16.70539  C   ?  A  ?   196  1
  ATOM    1568  CG   .  ASN  A  219  ?  -21.10545  -47.67304   45.36497  1.000   20.48028  C   ?  A  ?   196  1
  ATOM    1569  OD1  .  ASN  A  219  ?  -22.25939  -47.81383   44.96515  1.000   22.52069  O   ?  A  ?   196  1
  ATOM    1570  ND2  .  ASN  A  219  ?  -20.22592  -48.66684   45.37947  1.000   19.35554  N   ?  A  ?   196  1
  ATOM    1571  O    .  THR  A  220  ?  -20.43023  -43.00242   48.25601  1.000   11.36491  O   ?  A  ?   197  1
  ATOM    1572  N    .  THR  A  220  ?  -20.69489  -43.22398   45.50947  1.000    8.50869  N   ?  A  ?   197  1
  ATOM    1573  CA   .  THR  A  220  ?  -20.42895  -41.92374   46.10749  1.000    9.11990  C   ?  A  ?   197  1
  ATOM    1574  C    .  THR  A  220  ?  -19.97066  -42.10167   47.54804  1.000   10.52797  C   ?  A  ?   197  1
  ATOM    1575  CB   .  THR  A  220  ?  -21.66820  -41.02769   46.05228  1.000   12.32025  C   ?  A  ?   197  1
  ATOM    1576  OG1  .  THR  A  220  ?  -22.76902  -41.67842   46.69580  1.000   10.39805  O   ?  A  ?   197  1
  ATOM    1577  CG2  .  THR  A  220  ?  -22.03741  -40.71021   44.60736  1.000   11.64735  C   ?  A  ?   197  1
  ATOM    1578  O    .  LEU  A  221  ?  -19.69223  -41.78152   51.37031  1.000   10.12654  O   ?  A  ?   198  1
  ATOM    1579  N    .  LEU  A  221  ?  -19.04251  -41.24169   47.97331  1.000    9.97177  N   ?  A  ?   198  1
  ATOM    1580  CA   .  LEU  A  221  ?  -18.50870  -41.33753   49.32763  1.000   10.73517  C   ?  A  ?   198  1
  ATOM    1581  C    .  LEU  A  221  ?  -19.59140  -41.06952   50.36382  1.000    8.90355  C   ?  A  ?   198  1
  ATOM    1582  CB   .  LEU  A  221  ?  -17.34915  -40.35963   49.49749  1.000    9.88652  C   ?  A  ?   198  1
  ATOM    1583  CG   .  LEU  A  221  ?  -16.68670  -40.30881   50.87432  1.000   10.48498  C   ?  A  ?   198  1
  ATOM    1584  CD1  .  LEU  A  221  ?  -16.05425  -41.64496   51.20979  1.000    8.96100  C   ?  A  ?   198  1
  ATOM    1585  CD2  .  LEU  A  221  ?  -15.65277  -39.19588   50.91024  1.000   12.36978  C   ?  A  ?   198  1
  ATOM    1586  O    .  LEU  A  222  ?  -22.78140  -40.81092   49.20616  1.000   13.50656  O   ?  A  ?   199  1
  ATOM    1587  N    .  LEU  A  222  ?  -20.39968  -40.04692   50.13812  1.000   10.19669  N   ?  A  ?   199  1
  ATOM    1588  CA   .  LEU  A  222  ?  -21.55387  -39.75063   50.97068  1.000   10.63581  C   ?  A  ?   199  1
  ATOM    1589  C    .  LEU  A  222  ?  -22.79776  -40.36635   50.35700  1.000   12.84478  C   ?  A  ?   199  1
  ATOM    1590  CB   .  LEU  A  222  ?  -21.70756  -38.24039   51.10946  1.000   10.17944  C   ?  A  ?   199  1
  ATOM    1591  CG   .  LEU  A  222  ?  -20.50770  -37.48064   51.66824  1.000   15.46277  C   ?  A  ?   199  1
  ATOM    1592  CD1  .  LEU  A  222  ?  -20.83068  -36.00407   51.75999  1.000   16.56418  C   ?  A  ?   199  1
  ATOM    1593  CD2  .  LEU  A  222  ?  -20.10426  -38.02985   53.02701  1.000   17.14182  C   ?  A  ?   199  1
  ATOM    1594  O    .  PRO  A  223  ?  -25.38833  -38.67977   49.42404  1.000   13.23449  O   ?  A  ?   200  1
  ATOM    1595  N    .  PRO  A  223  ?  -23.89707  -40.43590   51.10675  1.000   13.27929  N   ?  A  ?   200  1
  ATOM    1596  CA   .  PRO  A  223  ?  -25.17148  -40.81985   50.49146  1.000   13.85701  C   ?  A  ?   200  1
  ATOM    1597  C    .  PRO  A  223  ?  -25.48514  -39.90362   49.31923  1.000   14.11363  C   ?  A  ?   200  1
  ATOM    1598  CB   .  PRO  A  223  ?  -26.17617  -40.65681   51.63446  1.000   11.34880  C   ?  A  ?   200  1
  ATOM    1599  CG   .  PRO  A  223  ?  -25.36840  -40.89501   52.85949  1.000   12.34997  C   ?  A  ?   200  1
  ATOM    1600  CD   .  PRO  A  223  ?  -24.00985  -40.31700   52.57250  1.000   14.46124  C   ?  A  ?   200  1
  ATOM    1601  O    .  ILE  A  224  ?  -26.91927  -37.63476   46.35694  1.000   12.57011  O   ?  A  ?   201  1
  ATOM    1602  N    .  ILE  A  224  ?  -25.84870  -40.51015   48.18594  1.000   15.01750  N   ?  A  ?   201  1
  ATOM    1603  CA   .  ILE  A  224  ?  -25.96067  -39.75696   46.93813  1.000   15.82299  C   ?  A  ?   201  1
  ATOM    1604  C    .  ILE  A  224  ?  -27.01240  -38.66164   47.04174  1.000   13.97087  C   ?  A  ?   201  1
  ATOM    1605  CB   .  ILE  A  224  ?  -26.25110  -40.71314   45.76416  1.000   14.30925  C   ?  A  ?   201  1
  ATOM    1606  CG1  .  ILE  A  224  ?  -26.20676  -39.95466   44.43783  1.000   13.89360  C   ?  A  ?   201  1
  ATOM    1607  CG2  .  ILE  A  224  ?  -27.59872  -41.39292   45.94544  1.000   15.67234  C   ?  A  ?   201  1
  ATOM    1608  CD1  .  ILE  A  224  ?  -25.96904  -40.83702   43.24349  1.000   15.19042  C   ?  A  ?   201  1
  ATOM    1609  O    .  ASN  A  225  ?  -29.19191  -35.50385   48.54219  1.000   22.36423  O   ?  A  ?   202  1
  ATOM    1610  N    .  ASN  A  225  ?  -28.01602  -38.84793   47.90309  1.000   16.26141  N   ?  A  ?   202  1
  ATOM    1611  CA   .  ASN  A  225  ?  -29.05763  -37.84195   48.07880  1.000   21.52489  C   ?  A  ?   202  1
  ATOM    1612  C    .  ASN  A  225  ?  -28.52017  -36.53597   48.64790  1.000   21.00907  C   ?  A  ?   202  1
  ATOM    1613  CB   .  ASN  A  225  ?  -30.15709  -38.39070   48.98932  1.000   28.63181  C   ?  A  ?   202  1
  ATOM    1614  CG   .  ASN  A  225  ?  -29.60010  -39.16857   50.17244  1.000   31.92023  C   ?  A  ?   202  1
  ATOM    1615  OD1  .  ASN  A  225  ?  -29.17130  -40.31466   50.02756  1.000   32.27436  O   ?  A  ?   202  1
  ATOM    1616  ND2  .  ASN  A  225  ?  -29.61240  -38.55117   51.35115  1.000   31.81082  N   ?  A  ?   202  1
  ATOM    1617  O    .  GLN  A  226  ?  -25.58392  -33.39015   49.25835  1.000   15.39327  O   ?  A  ?   203  1
  ATOM    1618  N    .  GLN  A  226  ?  -27.33166  -36.55630   49.24590  1.000   17.45347  N   ?  A  ?   203  1
  ATOM    1619  CA   .  GLN  A  226  ?  -26.75430  -35.37484   49.86728  1.000   16.41158  C   ?  A  ?   203  1
  ATOM    1620  C    .  GLN  A  226  ?  -25.99687  -34.49277   48.88611  1.000   14.28594  C   ?  A  ?   203  1
  ATOM    1621  CB   .  GLN  A  226  ?  -25.82450  -35.79324   51.00818  1.000   15.44921  C   ?  A  ?   203  1
  ATOM    1622  CG   .  GLN  A  226  ?  -26.47710  -36.75602   51.98066  1.000   16.19627  C   ?  A  ?   203  1
  ATOM    1623  CD   .  GLN  A  226  ?  -25.70947  -36.88917   53.27756  1.000   18.90777  C   ?  A  ?   203  1
  ATOM    1624  OE1  .  GLN  A  226  ?  -24.63295  -36.31361   53.43734  1.000   21.56716  O   ?  A  ?   203  1
  ATOM    1625  NE2  .  GLN  A  226  ?  -26.26065  -37.65322   54.21532  1.000   16.97545  N   ?  A  ?   203  1
  ATOM    1626  O    .  TYR  A  227  ?  -26.26907  -33.05822   44.84217  1.000   15.41589  O   ?  A  ?   204  1
  ATOM    1627  N    .  TYR  A  227  ?  -25.81826  -34.93892   47.64478  1.000   10.34967  N   ?  A  ?   204  1
  ATOM    1628  CA   .  TYR  A  227  ?  -25.08363  -34.17116   46.64302  1.000    9.95783  C   ?  A  ?   204  1
  ATOM    1629  C    .  TYR  A  227  ?  -25.98840  -33.09393   46.03973  1.000   12.34280  C   ?  A  ?   204  1
  ATOM    1630  CB   .  TYR  A  227  ?  -24.51505  -35.10954   45.58597  1.000    9.35292  C   ?  A  ?   204  1
  ATOM    1631  CG   .  TYR  A  227  ?  -23.37084  -35.95052   46.11165  1.000   11.73382  C   ?  A  ?   204  1
  ATOM    1632  CD1  .  TYR  A  227  ?  -22.07213  -35.73436   45.67918  1.000   10.65394  C   ?  A  ?   204  1
  ATOM    1633  CD2  .  TYR  A  227  ?  -23.58717  -36.94159   47.06357  1.000    9.94109  C   ?  A  ?   204  1
  ATOM    1634  CE1  .  TYR  A  227  ?  -21.02197  -36.48818   46.16503  1.000   11.02294  C   ?  A  ?   204  1
  ATOM    1635  CE2  .  TYR  A  227  ?  -22.54263  -37.70192   47.55607  1.000   10.18853  C   ?  A  ?   204  1
  ATOM    1636  CZ   .  TYR  A  227  ?  -21.26034  -37.47019   47.10393  1.000   11.89707  C   ?  A  ?   204  1
  ATOM    1637  OH   .  TYR  A  227  ?  -20.21034  -38.22161   47.58843  1.000    9.28541  O   ?  A  ?   204  1
  ATOM    1638  O    .  THR  A  228  ?  -27.39771  -29.24162   45.08937  1.000   18.00629  O   ?  A  ?   205  1
  ATOM    1639  N    .  THR  A  228  ?  -26.44601  -32.19664   46.91780  1.000   12.78801  N   ?  A  ?   205  1
  ATOM    1640  CA   .  THR  A  228  ?  -27.38234  -31.15485   46.51514  1.000   14.32580  C   ?  A  ?   205  1
  ATOM    1641  C    .  THR  A  228  ?  -26.70654  -30.03900   45.73219  1.000   13.96315  C   ?  A  ?   205  1
  ATOM    1642  CB   .  THR  A  228  ?  -28.08654  -30.57919   47.74445  1.000   14.37351  C   ?  A  ?   205  1
  ATOM    1643  OG1  .  THR  A  228  ?  -27.11193  -30.17194   48.71435  1.000   16.05633  O   ?  A  ?   205  1
  ATOM    1644  CG2  .  THR  A  228  ?  -28.99733  -31.62127   48.36243  1.000   13.68411  C   ?  A  ?   205  1
  ATOM    1645  O    .  GLU  A  229  ?  -24.05055  -28.62777   42.68851  1.000   15.27892  O   ?  A  ?   206  1
  ATOM    1646  N    .  GLU  A  229  ?  -25.37848  -29.96860   45.76665  1.000   11.93241  N   ?  A  ?   206  1
  ATOM    1647  CA   .  GLU  A  229  ?  -24.64406  -29.00177   44.96635  1.000   13.34499  C   ?  A  ?   206  1
  ATOM    1648  C    .  GLU  A  229  ?  -24.53927  -29.41495   43.50562  1.000   14.23597  C   ?  A  ?   206  1
  ATOM    1649  CB   .  GLU  A  229  ?  -23.24396  -28.79918   45.55148  1.000   14.81334  C   ?  A  ?   206  1
  ATOM    1650  CG   .  GLU  A  229  ?  -23.22629  -28.37774   47.01949  1.000   15.18697  C   ?  A  ?   206  1
  ATOM    1651  CD   .  GLU  A  229  ?  -23.34744  -29.54767   47.98828  1.000   15.96864  C   ?  A  ?   206  1
  ATOM    1652  OE1  .  GLU  A  229  ?  -23.64186  -30.67672   47.54188  1.000   14.03994  O   ?  A  ?   206  1
  ATOM    1653  OE2  .  GLU  A  229  ?  -23.14630  -29.33728   49.20302  1.000   16.75053  O   ?  A  ?   206  1
  ATOM    1654  O    .  SER  A  230  ?  -27.32822  -31.13082   41.88997  1.000   12.99715  O   ?  A  ?   207  1
  ATOM    1655  N    .  SER  A  230  ?  -24.98998  -30.61710   43.16310  1.000   14.43912  N   ?  A  ?   207  1
  ATOM    1656  CA   .  SER  A  230  ?  -24.91517  -31.15524   41.81420  1.000   12.86924  C   ?  A  ?   207  1
  ATOM    1657  C    .  SER  A  230  ?  -26.30867  -31.27211   41.20969  1.000   12.19552  C   ?  A  ?   207  1
  ATOM    1658  CB   .  SER  A  230  ?  -24.22710  -32.52598   41.81583  1.000   10.27208  C   ?  A  ?   207  1
  ATOM    1659  OG   .  SER  A  230  ?  -22.90473  -32.43937   42.31456  1.000    9.22819  O   ?  A  ?   207  1
  ATOM    1660  O    .  SER  A  231  ?  -27.54777  -33.86772   40.46668  1.000   16.58412  O   ?  A  ?   208  1
  ATOM    1661  N    .  SER  A  231  ?  -26.33855  -31.54308   39.90977  1.000    7.31349  N   ?  A  ?   208  1
  ATOM    1662  CA   .  SER  A  231  ?  -27.58948  -31.79967   39.21100  1.000   13.07302  C   ?  A  ?   208  1
  ATOM    1663  C    .  SER  A  231  ?  -28.08673  -33.19705   39.58144  1.000   16.86211  C   ?  A  ?   208  1
  ATOM    1664  CB   .  SER  A  231  ?  -27.39303  -31.64186   37.70700  1.000   12.86469  C   ?  A  ?   208  1
  ATOM    1665  OG   .  SER  A  231  ?  -26.52505  -32.64124   37.20086  1.000   11.46481  O   ?  A  ?   208  1
  ATOM    1666  O    .  GLU  A  232  ?  -27.61888  -35.55279   37.71059  1.000   17.42661  O   ?  A  ?   209  1
  ATOM    1667  N    .  GLU  A  232  ?  -29.13581  -33.65352   38.90349  1.000   19.39565  N   ?  A  ?   209  1
  ATOM    1668  CA   .  GLU  A  232  ?  -29.55029  -35.03623   39.06548  1.000   22.78039  C   ?  A  ?   209  1
  ATOM    1669  C    .  GLU  A  232  ?  -28.48514  -35.96419   38.48825  1.000   19.25143  C   ?  A  ?   209  1
  ATOM    1670  CB   .  GLU  A  232  ?  -30.89863  -35.28413   38.38767  1.000   28.57139  C   ?  A  ?   209  1
  ATOM    1671  CG   .  GLU  A  232  ?  -32.04246  -34.43409   38.92757  1.000   35.87536  C   ?  A  ?   209  1
  ATOM    1672  CD   .  GLU  A  232  ?  -32.59945  -34.93833   40.25092  1.000   43.82426  C   ?  A  ?   209  1
  ATOM    1673  OE1  .  GLU  A  232  ?  -33.64992  -34.41852   40.68137  1.000   48.17455  O   ?  A  ?   209  1
  ATOM    1674  OE2  .  GLU  A  232  ?  -32.00018  -35.84945   40.86177  1.000   45.42834  O   ?  A  ?   209  1
  ATOM    1675  O    .  ASP  A  233  ?  -26.61962  -38.44909   36.24472  1.000   11.83557  O   ?  A  ?   210  1
  ATOM    1676  N    .  ASP  A  233  ?  -28.55260  -37.23560   38.88188  1.000   17.53069  N   ?  A  ?   210  1
  ATOM    1677  CA   .  ASP  A  233  ?  -27.52926  -38.18213   38.45289  1.000   16.77140  C   ?  A  ?   210  1
  ATOM    1678  C    .  ASP  A  233  ?  -27.62933  -38.46477   36.95814  1.000   13.65355  C   ?  A  ?   210  1
  ATOM    1679  CB   .  ASP  A  233  ?  -27.63765  -39.47356   39.25981  1.000   15.34365  C   ?  A  ?   210  1
  ATOM    1680  CG   .  ASP  A  233  ?  -26.36895  -40.29384   39.20634  1.000   15.79099  C   ?  A  ?   210  1
  ATOM    1681  OD1  .  ASP  A  233  ?  -25.34428  -39.76926   38.72121  1.000   16.32482  O   ?  A  ?   210  1
  ATOM    1682  OD2  .  ASP  A  233  ?  -26.39125  -41.45829   39.65467  1.000   14.48411  O   ?  A  ?   210  1
  ATOM    1683  O    .  ASN  A  234  ?  -30.65386  -37.36620   34.43381  1.000   19.25912  O   ?  A  ?   211  1
  ATOM    1684  N    .  ASN  A  234  ?  -28.83796  -38.71467   36.46316  1.000   12.41485  N   ?  A  ?   211  1
  ATOM    1685  CA   .  ASN  A  234  ?  -29.05946  -39.05066   35.05729  1.000   15.96621  C   ?  A  ?   211  1
  ATOM    1686  C    .  ASN  A  234  ?  -29.50009  -37.78924   34.32359  1.000   16.24817  C   ?  A  ?   211  1
  ATOM    1687  CB   .  ASN  A  234  ?  -30.09686  -40.16027   34.92099  1.000   18.69751  C   ?  A  ?   211  1
  ATOM    1688  CG   .  ASN  A  234  ?  -30.06946  -40.81904   33.55605  1.000   23.07967  C   ?  A  ?   211  1
  ATOM    1689  OD1  .  ASN  A  234  ?  -29.26656  -40.45946   32.69499  1.000   27.78907  O   ?  A  ?   211  1
  ATOM    1690  ND2  .  ASN  A  234  ?  -30.93850  -41.80137   33.35730  1.000   25.37075  N   ?  A  ?   211  1
  ATOM    1691  O    .  VAL  A  235  ?  -27.41740  -37.06920   31.13969  1.000   20.74705  O   ?  A  ?   212  1
  ATOM    1692  N    .  VAL  A  235  ?  -28.57696  -37.18776   33.57105  1.000   14.98646  N   ?  A  ?   212  1
  ATOM    1693  CA   .  VAL  A  235  ?  -28.87706  -36.02426   32.74858  1.000   15.90790  C   ?  A  ?   212  1
  ATOM    1694  C    .  VAL  A  235  ?  -28.32178  -36.25927   31.34945  1.000   17.26841  C   ?  A  ?   212  1
  ATOM    1695  CB   .  VAL  A  235  ?  -28.32182  -34.71458   33.34930  1.000   15.48083  C   ?  A  ?   212  1
  ATOM    1696  CG1  .  VAL  A  235  ?  -29.02556  -34.39285   34.66132  1.000   15.67056  C   ?  A  ?   212  1
  ATOM    1697  CG2  .  VAL  A  235  ?  -26.82906  -34.82121   33.55826  1.000   17.65959  C   ?  A  ?   212  1
  ATOM    1698  O    A  GLU  A  236  ?  -26.52894  -35.95621   27.70533  0.500   19.93841  O   ?  A  ?   213  1
  ATOM    1699  N    A  GLU  A  236  ?  -28.87645  -35.53111   30.37774  0.500   18.71953  N   ?  A  ?   213  1
  ATOM    1700  CA   A  GLU  A  236  ?  -28.54775  -35.80510   28.98015  0.500   20.88154  C   ?  A  ?   213  1
  ATOM    1701  C    A  GLU  A  236  ?  -27.13044  -35.37690   28.61689  0.500   20.03076  C   ?  A  ?   213  1
  ATOM    1702  CB   A  GLU  A  236  ?  -29.55114  -35.11447   28.05728  0.500   24.65507  C   ?  A  ?   213  1
  ATOM    1703  CG   A  GLU  A  236  ?  -29.79572  -33.65599   28.40118  0.500   28.54513  C   ?  A  ?   213  1
  ATOM    1704  CD   A  GLU  A  236  ?  -29.54207  -32.71648   27.23702  0.500   33.42881  C   ?  A  ?   213  1
  ATOM    1705  OE1  A  GLU  A  236  ?  -28.38425  -32.63631   26.77382  0.500   33.90320  O   ?  A  ?   213  1
  ATOM    1706  OE2  A  GLU  A  236  ?  -30.50283  -32.05709   26.78539  0.500   33.83861  O   ?  A  ?   213  1
  ATOM    1707  O    B  GLU  A  236  ?  -26.56930  -35.97859   27.72479  0.500   19.98134  O   ?  A  ?   213  1
  ATOM    1708  N    B  GLU  A  236  ?  -28.88293  -35.51522   30.39388  0.500   18.69843  N   ?  A  ?   213  1
  ATOM    1709  CA   B  GLU  A  236  ?  -28.59507  -35.72813   28.97961  0.500   20.89161  C   ?  A  ?   213  1
  ATOM    1710  C    B  GLU  A  236  ?  -27.15976  -35.36086   28.61871  0.500   20.03570  C   ?  A  ?   213  1
  ATOM    1711  CB   B  GLU  A  236  ?  -29.58694  -34.91704   28.14035  0.500   24.70222  C   ?  A  ?   213  1
  ATOM    1712  CG   B  GLU  A  236  ?  -29.21496  -34.75193   26.67874  0.500   28.52140  C   ?  A  ?   213  1
  ATOM    1713  CD   B  GLU  A  236  ?  -29.18912  -33.29730   26.24465  0.500   33.40860  C   ?  A  ?   213  1
  ATOM    1714  OE1  B  GLU  A  236  ?  -30.04891  -32.90002   25.42937  0.500   33.72828  O   ?  A  ?   213  1
  ATOM    1715  OE2  B  GLU  A  236  ?  -28.31168  -32.54887   26.72647  0.500   34.04139  O   ?  A  ?   213  1
  ATOM    1716  O    .  TRP  A  237  ?  -22.96182  -34.06194   29.36472  1.000   16.01626  O   ?  A  ?   214  1
  ATOM    1717  N    .  TRP  A  237  ?  -26.58186  -34.37528   29.29943  1.000   18.79765  N   ?  A  ?   214  1
  ATOM    1718  CA   .  TRP  A  237  ?  -25.29349  -33.80648   28.92230  1.000   16.99144  C   ?  A  ?   214  1
  ATOM    1719  C    .  TRP  A  237  ?  -24.09284  -34.53213   29.52660  1.000   15.60463  C   ?  A  ?   214  1
  ATOM    1720  CB   .  TRP  A  237  ?  -25.25067  -32.32257   29.30138  1.000   13.22377  C   ?  A  ?   214  1
  ATOM    1721  CG   .  TRP  A  237  ?  -25.59527  -32.05225   30.72801  1.000   11.64952  C   ?  A  ?   214  1
  ATOM    1722  CD1  .  TRP  A  237  ?  -24.75164  -32.10453   31.79688  1.000   11.76248  C   ?  A  ?   214  1
  ATOM    1723  CD2  .  TRP  A  237  ?  -26.87624  -31.67282   31.24540  1.000   11.48730  C   ?  A  ?   214  1
  ATOM    1724  NE1  .  TRP  A  237  ?  -25.42777  -31.78793   32.95016  1.000    9.92156  N   ?  A  ?   214  1
  ATOM    1725  CE2  .  TRP  A  237  ?  -26.73340  -31.51646   32.63802  1.000   11.43055  C   ?  A  ?   214  1
  ATOM    1726  CE3  .  TRP  A  237  ?  -28.12975  -31.45027   30.66628  1.000   11.49279  C   ?  A  ?   214  1
  ATOM    1727  CZ2  .  TRP  A  237  ?  -27.79517  -31.15136   33.46057  1.000   12.76419  C   ?  A  ?   214  1
  ATOM    1728  CZ3  .  TRP  A  237  ?  -29.18139  -31.08764   31.48370  1.000   12.34935  C   ?  A  ?   214  1
  ATOM    1729  CH2  .  TRP  A  237  ?  -29.00750  -30.94051   32.86642  1.000   13.38076  C   ?  A  ?   214  1
  ATOM    1730  O    .  GLU  A  238  ?  -23.70650  -38.31907   29.44289  1.000   15.49299  O   ?  A  ?   215  1
  ATOM    1731  N    .  GLU  A  238  ?  -24.29571  -35.66332   30.19455  1.000   13.58052  N   ?  A  ?   215  1
  ATOM    1732  CA   .  GLU  A  238  ?  -23.19677  -36.40231   30.80075  1.000   13.81897  C   ?  A  ?   215  1
  ATOM    1733  C    .  GLU  A  238  ?  -22.83081  -37.61695   29.95688  1.000   16.27703  C   ?  A  ?   215  1
  ATOM    1734  CB   .  GLU  A  238  ?  -23.54963  -36.84414   32.22174  1.000   13.26125  C   ?  A  ?   215  1
  ATOM    1735  CG   .  GLU  A  238  ?  -23.41811  -35.75406   33.26981  1.000   12.85987  C   ?  A  ?   215  1
  ATOM    1736  CD   .  GLU  A  238  ?  -23.79085  -36.23757   34.65880  1.000   12.83392  C   ?  A  ?   215  1
  ATOM    1737  OE1  .  GLU  A  238  ?  -24.11019  -35.39173   35.52067  1.000   15.46972  O   ?  A  ?   215  1
  ATOM    1738  OE2  .  GLU  A  238  ?  -23.77214  -37.46566   34.88464  1.000    8.75712  O   ?  A  ?   215  1
  ATOM    1739  O    .  GLY  A  239  ?  -21.42059  -40.30078   31.08185  1.000   19.71264  O   ?  A  ?   216  1
  ATOM    1740  N    .  GLY  A  239  ?  -21.52693  -37.85938   29.82354  1.000   15.51055  N   ?  A  ?   216  1
  ATOM    1741  CA   .  GLY  A  239  ?  -21.03073  -39.00046   29.08715  1.000   18.10425  C   ?  A  ?   216  1
  ATOM    1742  C    .  GLY  A  239  ?  -21.03555  -40.27327   29.91257  1.000   22.58748  C   ?  A  ?   216  1
  ATOM    1743  O    .  LEU  A  240  ?  -18.19297  -42.48692   30.03968  1.000   31.21731  O   ?  A  ?   217  1
  ATOM    1744  N    .  LEU  A  240  ?  -20.58546  -41.35111   29.27785  1.000   26.38279  N   ?  A  ?   217  1
  ATOM    1745  CA   .  LEU  A  240  ?  -20.59491  -42.67759   29.87549  1.000   29.03790  C   ?  A  ?   217  1
  ATOM    1746  C    .  LEU  A  240  ?  -19.22402  -43.03354   30.43971  1.000   31.08584  C   ?  A  ?   217  1
  ATOM    1747  CB   .  LEU  A  240  ?  -21.02329  -43.73512   28.85239  1.000   28.83075  C   ?  A  ?   217  1
  ATOM    1748  CG   .  LEU  A  240  ?  -22.40917  -43.60643   28.21174  1.000   28.45690  C   ?  A  ?   217  1
  ATOM    1749  CD1  .  LEU  A  240  ?  -22.72983  -44.83782   27.37306  1.000   29.28840  C   ?  A  ?   217  1
  ATOM    1750  CD2  .  LEU  A  240  ?  -23.48528  -43.37648   29.26088  1.000   27.84472  C   ?  A  ?   217  1
  ATOM    1751  O    .  LEU  A  241  ?  -18.96015  -46.65150   32.25856  1.000   34.39252  O   ?  A  ?   218  1
  ATOM    1752  N    .  LEU  A  241  ?  -19.22957  -43.97269   31.38178  1.000   31.08560  N   ?  A  ?   218  1
  ATOM    1753  CA   .  LEU  A  241  ?  -18.01474  -44.46786   32.01219  1.000   32.59869  C   ?  A  ?   218  1
  ATOM    1754  C    .  LEU  A  241  ?  -17.98407  -45.98309   31.90256  1.000   34.19434  C   ?  A  ?   218  1
  ATOM    1755  CB   .  LEU  A  241  ?  -17.93933  -44.04875   33.48213  1.000   33.42780  C   ?  A  ?   218  1
  ATOM    1756  CG   .  LEU  A  241  ?  -16.73824  -44.59410   34.25375  1.000   32.59554  C   ?  A  ?   218  1
  ATOM    1757  CD1  .  LEU  A  241  ?  -15.47018  -43.89272   33.80975  1.000   33.61236  C   ?  A  ?   218  1
  ATOM    1758  CD2  .  LEU  A  241  ?  -16.94178  -44.45048   35.75328  1.000   30.56984  C   ?  A  ?   218  1
  ATOM    1759  O    .  GLY  A  242  ?  -18.17952  -48.06551   29.40917  1.000   38.34389  O   ?  A  ?   219  1
  ATOM    1760  N    .  GLY  A  242  ?  -16.86655  -46.51787   31.41843  1.000   34.81544  N   ?  A  ?   219  1
  ATOM    1761  CA   .  GLY  A  242  ?  -16.72944  -47.96201   31.32287  1.000   35.82386  C   ?  A  ?   219  1
  ATOM    1762  C    .  GLY  A  242  ?  -17.83406  -48.56935   30.48298  1.000   35.97303  C   ?  A  ?   219  1
  ATOM    1763  O    .  SER  A  243  ?  -21.74772  -50.21402   29.70596  1.000   37.13747  O   ?  A  ?   220  1
  ATOM    1764  N    .  SER  A  243  ?  -18.41726  -49.65618   30.98683  1.000   32.22033  N   ?  A  ?   220  1
  ATOM    1765  CA   .  SER  A  243  ?  -19.43483  -50.38870   30.24705  1.000   31.04584  C   ?  A  ?   220  1
  ATOM    1766  C    .  SER  A  243  ?  -20.85077  -49.88127   30.48825  1.000   33.36433  C   ?  A  ?   220  1
  ATOM    1767  CB   .  SER  A  243  ?  -19.36845  -51.87792   30.60081  1.000   29.91988  C   ?  A  ?   220  1
  ATOM    1768  OG   .  SER  A  243  ?  -19.45563  -52.07140   32.00202  1.000   28.78212  O   ?  A  ?   220  1
  ATOM    1769  O    .  LYS  A  244  ?  -22.25030  -46.90570   30.22871  1.000   29.71850  O   ?  A  ?   221  1
  ATOM    1770  N    .  LYS  A  244  ?  -21.07705  -49.09169   31.53663  1.000   31.56307  N   ?  A  ?   221  1
  ATOM    1771  CA   .  LYS  A  244  ?  -22.42988  -48.65929   31.86836  1.000   27.15540  C   ?  A  ?   221  1
  ATOM    1772  C    .  LYS  A  244  ?  -22.97829  -47.72790   30.79193  1.000   29.69460  C   ?  A  ?   221  1
  ATOM    1773  CB   .  LYS  A  244  ?  -22.44616  -47.96865   33.23331  1.000   21.02459  C   ?  A  ?   221  1
  ATOM    1774  CG   .  LYS  A  244  ?  -23.83584  -47.79207   33.83536  1.000   18.27172  C   ?  A  ?   221  1
  ATOM    1775  CD   .  LYS  A  244  ?  -23.76545  -47.50176   35.33345  1.000   15.76591  C   ?  A  ?   221  1
  ATOM    1776  CE   .  LYS  A  244  ?  -25.14857  -47.54366   35.97257  1.000   13.44032  C   ?  A  ?   221  1
  ATOM    1777  NZ   .  LYS  A  244  ?  -25.09702  -47.43021   37.45790  1.000   14.02150  N   ?  A  ?   221  1
  ATOM    1778  O    .  LYS  A  245  ?  -26.46825  -45.36302   29.05590  1.000   28.49297  O   ?  A  ?   222  1
  ATOM    1779  N    .  LYS  A  245  ?  -24.27575  -47.86185   30.50905  1.000   34.37894  N   ?  A  ?   222  1
  ATOM    1780  CA   .  LYS  A  245  ?  -24.92472  -47.15447   29.41091  1.000   39.39747  C   ?  A  ?   222  1
  ATOM    1781  C    .  LYS  A  245  ?  -25.77101  -45.97107   29.87444  1.000   33.44093  C   ?  A  ?   222  1
  ATOM    1782  CB   .  LYS  A  245  ?  -25.78922  -48.12085   28.59436  1.000   45.99074  C   ?  A  ?   222  1
  ATOM    1783  CG   .  LYS  A  245  ?  -25.09805  -49.42184   28.19742  1.000   50.21448  C   ?  A  ?   222  1
  ATOM    1784  CD   .  LYS  A  245  ?  -25.42944  -50.55558   29.16851  1.000   51.54828  C   ?  A  ?   222  1
  ATOM    1785  CE   .  LYS  A  245  ?  -26.27185  -51.65120   28.51438  1.000   51.03609  C   ?  A  ?   222  1
  ATOM    1786  NZ   .  LYS  A  245  ?  -27.69862  -51.26913   28.31199  1.000   51.04378  N   ?  A  ?   222  1
  ATOM    1787  O    .  THR  A  246  ?  -24.42914  -44.41703   33.16071  1.000   15.93864  O   ?  A  ?   223  1
  ATOM    1788  N    .  THR  A  246  ?  -25.74948  -45.65028   31.16308  1.000   30.75999  N   ?  A  ?   223  1
  ATOM    1789  CA   .  THR  A  246  ?  -26.31480  -44.41905   31.68915  1.000   26.34947  C   ?  A  ?   223  1
  ATOM    1790  C    .  THR  A  246  ?  -25.26242  -43.74017   32.54985  1.000   20.42321  C   ?  A  ?   223  1
  ATOM    1791  CB   .  THR  A  246  ?  -27.58183  -44.66723   32.52623  1.000   29.70913  C   ?  A  ?   223  1
  ATOM    1792  OG1  .  THR  A  246  ?  -27.25095  -45.43116   33.69280  1.000   30.20302  O   ?  A  ?   223  1
  ATOM    1793  CG2  .  THR  A  246  ?  -28.63304  -45.40779   31.71215  1.000   29.67779  C   ?  A  ?   223  1
  ATOM    1794  O    .  PRO  A  247  ?  -24.64866  -40.51501   35.45935  1.000   11.66171  O   ?  A  ?   224  1
  ATOM    1795  N    .  PRO  A  247  ?  -25.26185  -42.40296   32.60946  1.000   16.68652  N   ?  A  ?   224  1
  ATOM    1796  CA   .  PRO  A  247  ?  -24.25209  -41.67777   33.38865  1.000   12.75083  C   ?  A  ?   224  1
  ATOM    1797  C    .  PRO  A  247  ?  -24.59962  -41.59529   34.87193  1.000   11.82174  C   ?  A  ?   224  1
  ATOM    1798  CB   .  PRO  A  247  ?  -24.25663  -40.29335   32.73021  1.000   13.01011  C   ?  A  ?   224  1
  ATOM    1799  CG   .  PRO  A  247  ?  -25.68973  -40.10397   32.35479  1.000   12.10552  C   ?  A  ?   224  1
  ATOM    1800  CD   .  PRO  A  247  ?  -26.20485  -41.47649   31.95260  1.000   12.81234  C   ?  A  ?   224  1
  ATOM    1801  O    .  THR  A  248  ?  -24.07342  -44.77881   37.21214  1.000   12.30492  O   ?  A  ?   225  1
  ATOM    1802  N    .  THR  A  248  ?  -24.86232  -42.75123   35.48109  1.000   10.78522  N   ?  A  ?   225  1
  ATOM    1803  CA   .  THR  A  248  ?  -25.38757  -42.79930   36.83666  1.000   12.14006  C   ?  A  ?   225  1
  ATOM    1804  C    .  THR  A  248  ?  -24.59484  -43.77110   37.69651  1.000   12.29775  C   ?  A  ?   225  1
  ATOM    1805  CB   .  THR  A  248  ?  -26.86187  -43.22513   36.86067  1.000   14.75096  C   ?  A  ?   225  1
  ATOM    1806  OG1  .  THR  A  248  ?  -26.95895  -44.62599   36.57921  1.000   16.60621  O   ?  A  ?   225  1
  ATOM    1807  CG2  .  THR  A  248  ?  -27.65181  -42.47059   35.82124  1.000   16.62257  C   ?  A  ?   225  1
  ATOM    1808  O    .  PHE  A  249  ?  -26.29401  -45.25346   39.87745  1.000   15.73822  O   ?  A  ?   226  1
  ATOM    1809  N    .  PHE  A  249  ?  -24.52565  -43.45612   38.98561  1.000    9.97213  N   ?  A  ?   226  1
  ATOM    1810  CA   .  PHE  A  249  ?  -24.06366  -44.39434   39.99664  1.000   12.61678  C   ?  A  ?   226  1
  ATOM    1811  C    .  PHE  A  249  ?  -25.12141  -45.48292   40.17478  1.000   14.31361  C   ?  A  ?   226  1
  ATOM    1812  CB   .  PHE  A  249  ?  -23.80845  -43.67226   41.32269  1.000   10.31099  C   ?  A  ?   226  1
  ATOM    1813  CG   .  PHE  A  249  ?  -22.60091  -42.77967   41.30951  1.000    9.38010  C   ?  A  ?   226  1
  ATOM    1814  CD1  .  PHE  A  249  ?  -21.37093  -43.25138   41.74109  1.000    9.71017  C   ?  A  ?   226  1
  ATOM    1815  CD2  .  PHE  A  249  ?  -22.69505  -41.46977   40.87257  1.000   10.59684  C   ?  A  ?   226  1
  ATOM    1816  CE1  .  PHE  A  249  ?  -20.25519  -42.43281   41.73356  1.000    8.16365  C   ?  A  ?   226  1
  ATOM    1817  CE2  .  PHE  A  249  ?  -21.58525  -40.64617   40.86450  1.000   10.08377  C   ?  A  ?   226  1
  ATOM    1818  CZ   .  PHE  A  249  ?  -20.36357  -41.12894   41.29416  1.000    9.94091  C   ?  A  ?   226  1
  ATOM    1819  O    .  PRO  A  250  ?  -23.24008  -48.20005   38.88158  1.000   15.26886  O   ?  A  ?   227  1
  ATOM    1820  N    .  PRO  A  250  ?  -24.71930  -46.67210   40.65665  1.000   15.05389  N   ?  A  ?   227  1
  ATOM    1821  CA   .  PRO  A  250  ?  -23.34341  -47.06220   40.97653  1.000   14.19782  C   ?  A  ?   227  1
  ATOM    1822  C    .  PRO  A  250  ?  -22.61122  -47.62942   39.77254  1.000   14.81637  C   ?  A  ?   227  1
  ATOM    1823  CB   .  PRO  A  250  ?  -23.53098  -48.13259   42.04923  1.000   14.00122  C   ?  A  ?   227  1
  ATOM    1824  CG   .  PRO  A  250  ?  -24.81129  -48.78530   41.67582  1.000   14.58458  C   ?  A  ?   227  1
  ATOM    1825  CD   .  PRO  A  250  ?  -25.68245  -47.71741   41.05007  1.000   14.19909  C   ?  A  ?   227  1
  ATOM    1826  O    .  TYR  A  251  ?  -18.77725  -49.47963   39.63704  1.000   18.89283  O   ?  A  ?   228  1
  ATOM    1827  N    .  TYR  A  251  ?  -21.29014  -47.46699   39.74566  1.000   14.78975  N   ?  A  ?   228  1
  ATOM    1828  CA   .  TYR  A  251  ?  -20.46230  -48.02944   38.68304  1.000   14.07623  C   ?  A  ?   228  1
  ATOM    1829  C    .  TYR  A  251  ?  -19.91827  -49.36110   39.19167  1.000   17.44737  C   ?  A  ?   228  1
  ATOM    1830  CB   .  TYR  A  251  ?  -19.36372  -47.05034   38.28226  1.000   11.85361  C   ?  A  ?   228  1
  ATOM    1831  CG   .  TYR  A  251  ?  -19.91232  -45.77396   37.68184  1.000   11.39355  C   ?  A  ?   228  1
  ATOM    1832  CD1  .  TYR  A  251  ?  -20.27944  -45.71848   36.34498  1.000   15.24127  C   ?  A  ?   228  1
  ATOM    1833  CD2  .  TYR  A  251  ?  -20.08122  -44.63231   38.45448  1.000   10.57434  C   ?  A  ?   228  1
  ATOM    1834  CE1  .  TYR  A  251  ?  -20.79085  -44.56234   35.79004  1.000   13.17798  C   ?  A  ?   228  1
  ATOM    1835  CE2  .  TYR  A  251  ?  -20.58904  -43.46675   37.90582  1.000   13.76051  C   ?  A  ?   228  1
  ATOM    1836  CZ   .  TYR  A  251  ?  -20.94349  -43.43986   36.57141  1.000   12.56690  C   ?  A  ?   228  1
  ATOM    1837  OH   .  TYR  A  251  ?  -21.45370  -42.29083   36.00916  1.000   13.52826  O   ?  A  ?   228  1
  ATOM    1838  O    .  THR  A  252  ?  -18.83558  -53.37995   39.50917  1.000   20.22463  O   ?  A  ?   229  1
  ATOM    1839  N    .  THR  A  252  ?  -20.77493  -50.38177   39.12301  1.000   18.85652  N   ?  A  ?   229  1
  ATOM    1840  CA   .  THR  A  252  ?  -20.47472  -51.66892   39.73564  1.000   19.52377  C   ?  A  ?   229  1
  ATOM    1841  C    .  THR  A  252  ?  -19.48771  -52.50552   38.93272  1.000   17.13392  C   ?  A  ?   229  1
  ATOM    1842  CB   .  THR  A  252  ?  -21.76426  -52.46944   39.94118  1.000   24.71347  C   ?  A  ?   229  1
  ATOM    1843  OG1  .  THR  A  252  ?  -22.34059  -52.78767   38.66825  1.000   28.82869  O   ?  A  ?   229  1
  ATOM    1844  CG2  .  THR  A  252  ?  -22.76531  -51.66424   40.74992  1.000   25.12114  C   ?  A  ?   229  1
  ATOM    1845  N    .  ASP  A  253  ?  -19.35847  -52.27049   37.62749  1.000   17.19523  N   ?  A  ?   230  1
  ATOM    1846  CA   .  ASP  A  253  ?  -18.48627  -53.07873   36.78529  1.000   22.46157  C   ?  A  ?   230  1
  ATOM    1847  C    .  ASP  A  253  ?  -17.11618  -52.44366   36.57407  1.000   21.52887  C   ?  A  ?   230  1
  ATOM    1848  O    .  ASP  A  253  ?  -16.43149  -52.77395   35.59973  1.000   20.43631  O   ?  A  ?   230  1
  ATOM    1849  CB   .  ASP  A  253  ?  -19.15739  -53.35253   35.43970  1.000   26.06592  C   ?  A  ?   230  1
  ATOM    1850  CG   .  ASP  A  253  ?  -20.41130  -54.19345   35.57772  1.000   28.72694  C   ?  A  ?   230  1
  ATOM    1851  OD1  .  ASP  A  253  ?  -20.56285  -54.87325   36.61446  1.000   31.25275  O   ?  A  ?   230  1
  ATOM    1852  OD2  .  ASP  A  253  ?  -21.24368  -54.17874   34.64833  1.000   29.55320  O   ?  A  ?   230  1
  ATOM    1853  N    .  LEU  A  254  ?  -16.69753  -51.55627   37.47890  1.000   21.01377  N   ?  A  ?   231  1
  ATOM    1854  CA   .  LEU  A  254  ?  -15.42634  -50.85700   37.31352  1.000   19.13351  C   ?  A  ?   231  1
  ATOM    1855  C    .  LEU  A  254  ?  -14.25973  -51.83700   37.24265  1.000   19.96985  C   ?  A  ?   231  1
  ATOM    1856  O    .  LEU  A  254  ?  -13.43522  -51.77290   36.32288  1.000   18.15996  O   ?  A  ?   231  1
  ATOM    1857  CB   .  LEU  A  254  ?  -15.22905  -49.86825   38.46332  1.000   15.71250  C   ?  A  ?   231  1
  ATOM    1858  CG   .  LEU  A  254  ?  -14.51173  -48.54078   38.20896  1.000   16.32468  C   ?  A  ?   231  1
  ATOM    1859  CD1  .  LEU  A  254  ?  -13.16445  -48.72975   37.53105  1.000   19.70850  C   ?  A  ?   231  1
  ATOM    1860  CD2  .  LEU  A  254  ?  -14.33900  -47.80309   39.52749  1.000   14.98278  C   ?  A  ?   231  1
  ATOM    1861  N    .  ALA  A  255  ?  -14.17232  -52.74897   38.21445  1.000   19.15556  N   ?  A  ?   232  1
  ATOM    1862  CA   .  ALA  A  255  ?  -13.04673  -53.67715   38.26548  1.000   17.58225  C   ?  A  ?   232  1
  ATOM    1863  C    .  ALA  A  255  ?  -12.94320  -54.49313   36.98505  1.000   19.23963  C   ?  A  ?   232  1
  ATOM    1864  O    .  ALA  A  255  ?  -11.84589  -54.68194   36.44530  1.000   20.76985  O   ?  A  ?   232  1
  ATOM    1865  CB   .  ALA  A  255  ?  -13.18350  -54.59692   39.47718  1.000   16.10668  C   ?  A  ?   232  1
  ATOM    1866  N    .  LYS  A  256  ?  -14.07916  -54.98062   36.48295  1.000   19.97519  N   ?  A  ?   233  1
  ATOM    1867  CA   .  LYS  A  256  ?  -14.08379  -55.70469   35.21704  1.000   20.92634  C   ?  A  ?   233  1
  ATOM    1868  C    .  LYS  A  256  ?  -13.72704  -54.78598   34.05714  1.000   19.60538  C   ?  A  ?   233  1
  ATOM    1869  O    .  LYS  A  256  ?  -13.01682  -55.19282   33.13073  1.000   21.49231  O   ?  A  ?   233  1
  ATOM    1870  CB   .  LYS  A  256  ?  -15.45099  -56.34830   34.98685  1.000   23.16777  C   ?  A  ?   233  1
  ATOM    1871  N    .  ASP  A  257  ?  -14.21104  -53.54355   34.08748  1.000   19.07767  N   ?  A  ?   234  1
  ATOM    1872  CA   .  ASP  A  257  ?  -13.89962  -52.61733   33.00610  1.000   19.33688  C   ?  A  ?   234  1
  ATOM    1873  C    .  ASP  A  257  ?  -12.43671  -52.18314   33.05404  1.000   18.80448  C   ?  A  ?   234  1
  ATOM    1874  O    .  ASP  A  257  ?  -11.79037  -52.05893   32.00747  1.000   19.14125  O   ?  A  ?   234  1
  ATOM    1875  CB   .  ASP  A  257  ?  -14.83475  -51.40715   33.06050  1.000   21.51102  C   ?  A  ?   234  1
  ATOM    1876  CG   .  ASP  A  257  ?  -16.28879  -51.76508   32.77749  1.000   22.22137  C   ?  A  ?   234  1
  ATOM    1877  OD1  .  ASP  A  257  ?  -16.54216  -52.80189   32.13094  1.000   21.34238  O   ?  A  ?   234  1
  ATOM    1878  OD2  .  ASP  A  257  ?  -17.18181  -50.99995   33.20039  1.000   22.14038  O   ?  A  ?   234  1
  ATOM    1879  N    .  TYR  A  258  ?  -11.89075  -51.95986   34.25603  1.000   16.39924  N   ?  A  ?   235  1
  ATOM    1880  CA   .  TYR  A  258  ?  -10.48506  -51.57252   34.36265  1.000   16.87256  C   ?  A  ?   235  1
  ATOM    1881  C    .  TYR  A  258  ?   -9.56901  -52.66775   33.83857  1.000   22.55996  C   ?  A  ?   235  1
  ATOM    1882  O    .  TYR  A  258  ?   -8.54474  -52.38308   33.20672  1.000   17.32451  O   ?  A  ?   235  1
  ATOM    1883  CB   .  TYR  A  258  ?  -10.11225  -51.24332   35.80965  1.000   16.82478  C   ?  A  ?   235  1
  ATOM    1884  CG   .  TYR  A  258  ?   -8.60965  -51.15549   35.99818  1.000   15.59008  C   ?  A  ?   235  1
  ATOM    1885  CD1  .  TYR  A  258  ?   -7.91681  -50.00823   35.64194  1.000   12.88039  C   ?  A  ?   235  1
  ATOM    1886  CD2  .  TYR  A  258  ?   -7.88087  -52.22907   36.50590  1.000   15.34657  C   ?  A  ?   235  1
  ATOM    1887  CE1  .  TYR  A  258  ?   -6.54723  -49.92412   35.79410  1.000   12.43687  C   ?  A  ?   235  1
  ATOM    1888  CE2  .  TYR  A  258  ?   -6.50704  -52.15352   36.65709  1.000   13.46034  C   ?  A  ?   235  1
  ATOM    1889  CZ   .  TYR  A  258  ?   -5.84770  -50.99630   36.29825  1.000   13.72485  C   ?  A  ?   235  1
  ATOM    1890  OH   .  TYR  A  258  ?   -4.48301  -50.90583   36.43802  1.000   16.22793  O   ?  A  ?   235  1
  ATOM    1891  N    A  GLU  A  259  ?   -9.91199  -53.92496   34.11484  0.500   26.31910  N   ?  A  ?   236  1
  ATOM    1892  CA   A  GLU  A  259  ?   -9.12325  -55.04729   33.62191  0.500   27.21431  C   ?  A  ?   236  1
  ATOM    1893  C    A  GLU  A  259  ?   -9.00226  -55.01649   32.10616  0.500   26.41514  C   ?  A  ?   236  1
  ATOM    1894  O    A  GLU  A  259  ?   -7.91821  -55.22755   31.55088  0.500   27.49801  O   ?  A  ?   236  1
  ATOM    1895  CB   A  GLU  A  259  ?   -9.76342  -56.35165   34.07884  0.500   29.78045  C   ?  A  ?   236  1
  ATOM    1896  CG   A  GLU  A  259  ?   -9.43193  -56.71630   35.49099  0.500   32.94417  C   ?  A  ?   236  1
  ATOM    1897  CD   A  GLU  A  259  ?   -8.15833  -57.51245   35.56662  0.500   35.56556  C   ?  A  ?   236  1
  ATOM    1898  OE1  A  GLU  A  259  ?   -7.06862  -56.92590   35.39169  0.500   36.20830  O   ?  A  ?   236  1
  ATOM    1899  OE2  A  GLU  A  259  ?   -8.25361  -58.73864   35.77340  0.500   37.75638  O   ?  A  ?   236  1
  ATOM    1900  N    B  GLU  A  259  ?   -9.90678  -53.93075   34.11193  0.500   26.30732  N   ?  A  ?   236  1
  ATOM    1901  CA   B  GLU  A  259  ?   -9.09665  -55.03824   33.61336  0.500   27.20342  C   ?  A  ?   236  1
  ATOM    1902  C    B  GLU  A  259  ?   -8.99728  -55.01647   32.09658  0.500   26.41740  C   ?  A  ?   236  1
  ATOM    1903  O    B  GLU  A  259  ?   -7.92011  -55.23912   31.53175  0.500   27.48287  O   ?  A  ?   236  1
  ATOM    1904  CB   B  GLU  A  259  ?   -9.67886  -56.36953   34.08200  0.500   29.78709  C   ?  A  ?   236  1
  ATOM    1905  CG   B  GLU  A  259  ?   -9.30384  -56.71669   35.49211  0.500   32.97879  C   ?  A  ?   236  1
  ATOM    1906  CD   B  GLU  A  259  ?   -7.82005  -56.57280   35.72215  0.500   35.16429  C   ?  A  ?   236  1
  ATOM    1907  OE1  B  GLU  A  259  ?   -7.02444  -57.09429   34.91683  0.500   36.46129  O   ?  A  ?   236  1
  ATOM    1908  OE2  B  GLU  A  259  ?   -7.44702  -55.91684   36.69909  0.500   34.98264  O   ?  A  ?   236  1
  ATOM    1909  O    .  ALA  A  260  ?   -8.88642  -53.54021   28.30474  1.000   24.49580  O   ?  A  ?   237  1
  ATOM    1910  N    .  ALA  A  260  ?  -10.11381  -54.75780   31.41983  1.000   22.99424  N   ?  A  ?   237  1
  ATOM    1911  CA   .  ALA  A  260  ?  -10.10448  -54.75542   29.96587  1.000   23.45552  C   ?  A  ?   237  1
  ATOM    1912  C    .  ALA  A  260  ?   -9.44342  -53.50439   29.40676  1.000   23.96030  C   ?  A  ?   237  1
  ATOM    1913  CB   .  ALA  A  260  ?  -11.53423  -54.88175   29.43957  1.000   26.12818  C   ?  A  ?   237  1
  ATOM    1914  O    .  LYS  A  261  ?   -9.13351  -49.78713   31.66059  1.000   10.30875  O   ?  A  ?   238  1
  ATOM    1915  N    .  LYS  A  261  ?   -9.49504  -52.39663   30.14397  1.000   20.48161  N   ?  A  ?   238  1
  ATOM    1916  CA   .  LYS  A  261  ?   -8.90977  -51.13501   29.69426  1.000   18.29126  C   ?  A  ?   238  1
  ATOM    1917  C    .  LYS  A  261  ?   -8.37097  -50.42733   30.93284  1.000   11.62149  C   ?  A  ?   238  1
  ATOM    1918  CB   .  LYS  A  261  ?   -9.93765  -50.28119   28.96489  1.000   22.13361  C   ?  A  ?   238  1
  ATOM    1919  CG   .  LYS  A  261  ?   -9.73335  -50.19022   27.46494  1.000   27.16964  C   ?  A  ?   238  1
  ATOM    1920  CD   .  LYS  A  261  ?  -11.04502  -50.39466   26.72716  1.000   31.42163  C   ?  A  ?   238  1
  ATOM    1921  CE   .  LYS  A  261  ?  -11.09871  -49.57914   25.44661  1.000   35.42885  C   ?  A  ?   238  1
  ATOM    1922  NZ   .  LYS  A  261  ?  -11.78071  -48.27116   25.66409  1.000   39.76594  N   ?  A  ?   238  1
  ATOM    1923  O    .  LYS  A  262  ?   -6.31088  -47.85796   33.43311  1.000    9.20555  O   ?  A  ?   239  1
  ATOM    1924  N    .  LYS  A  262  ?   -7.06267  -50.54805   31.16499  1.000   11.02093  N   ?  A  ?   239  1
  ATOM    1925  CA   .  LYS  A  262  ?   -6.47807  -49.99179   32.37828  1.000    9.63235  C   ?  A  ?   239  1
  ATOM    1926  C    .  LYS  A  262  ?   -6.45546  -48.47069   32.36808  1.000   10.61075  C   ?  A  ?   239  1
  ATOM    1927  CB   .  LYS  A  262  ?   -5.07114  -50.55327   32.58669  1.000   11.62824  C   ?  A  ?   239  1
  ATOM    1928  CG   .  LYS  A  262  ?   -5.03746  -52.07058   32.53546  1.000   14.62783  C   ?  A  ?   239  1
  ATOM    1929  CD   .  LYS  A  262  ?   -4.21714  -52.67409   33.65564  1.000   18.21503  C   ?  A  ?   239  1
  ATOM    1930  CE   .  LYS  A  262  ?   -4.57461  -54.13952   33.83086  1.000   22.66316  C   ?  A  ?   239  1
  ATOM    1931  NZ   .  LYS  A  262  ?   -4.66863  -54.83287   32.51500  1.000   25.48444  N   ?  A  ?   239  1
  ATOM    1932  O    .  GLY  A  263  ?   -8.18058  -44.70342   32.01924  1.000   15.00944  O   ?  A  ?   240  1
  ATOM    1933  N    .  GLY  A  263  ?   -6.60662  -47.84951   31.19897  1.000   11.24273  N   ?  A  ?   240  1
  ATOM    1934  CA   .  GLY  A  263  ?   -6.77334  -46.40933   31.15341  1.000   13.32730  C   ?  A  ?   240  1
  ATOM    1935  C    .  GLY  A  263  ?   -8.04696  -45.91295   31.79879  1.000   15.47507  C   ?  A  ?   240  1
  ATOM    1936  O    .  LEU  A  264  ?  -10.86239  -44.85005   34.40707  1.000   11.52349  O   ?  A  ?   241  1
  ATOM    1937  N    .  LEU  A  264  ?   -8.97617  -46.81899   32.11409  1.000   14.62883  N   ?  A  ?   241  1
  ATOM    1938  CA   .  LEU  A  264  ?  -10.24950  -46.40967   32.69437  1.000   15.81424  C   ?  A  ?   241  1
  ATOM    1939  C    .  LEU  A  264  ?  -10.06919  -45.72855   34.04428  1.000   13.31470  C   ?  A  ?   241  1
  ATOM    1940  CB   .  LEU  A  264  ?  -11.17470  -47.61514   32.84456  1.000   19.33145  C   ?  A  ?   241  1
  ATOM    1941  CG   .  LEU  A  264  ?  -12.52291  -47.25147   33.46781  1.000   22.29637  C   ?  A  ?   241  1
  ATOM    1942  CD1  .  LEU  A  264  ?  -13.30806  -46.36990   32.51585  1.000   23.95590  C   ?  A  ?   241  1
  ATOM    1943  CD2  .  LEU  A  264  ?  -13.31172  -48.47222   33.85244  1.000   24.23349  C   ?  A  ?   241  1
  ATOM    1944  O    .  ILE  A  265  ?   -8.78043  -43.34375   37.06811  1.000   11.36614  O   ?  A  ?   242  1
  ATOM    1945  N    .  ILE  A  265  ?   -9.03446  -46.10982   34.79795  1.000   10.68340  N   ?  A  ?   242  1
  ATOM    1946  CA   .  ILE  A  265  ?   -8.83104  -45.54264   36.12551  1.000    6.85044  C   ?  A  ?   242  1
  ATOM    1947  C    .  ILE  A  265  ?   -8.57844  -44.04260   36.06838  1.000    7.72842  C   ?  A  ?   242  1
  ATOM    1948  CB   .  ILE  A  265  ?   -7.67782  -46.26745   36.84846  1.000    6.99816  C   ?  A  ?   242  1
  ATOM    1949  CG1  .  ILE  A  265  ?   -7.72952  -45.97783   38.34720  1.000   10.34951  C   ?  A  ?   242  1
  ATOM    1950  CG2  .  ILE  A  265  ?   -6.33573  -45.84698   36.27546  1.000    5.17775  C   ?  A  ?   242  1
  ATOM    1951  CD1  .  ILE  A  265  ?   -6.77713  -46.81660   39.15743  1.000   14.19477  C   ?  A  ?   242  1
  ATOM    1952  O    .  ARG  A  266  ?   -9.23105  -40.21758   35.57669  1.000   10.88787  O   ?  A  ?   243  1
  ATOM    1953  N    .  ARG  A  266  ?   -8.14632  -43.52297   34.91523  1.000    8.43956  N   ?  A  ?   243  1
  ATOM    1954  CA   .  ARG  A  266  ?   -7.95620  -42.08255   34.78882  1.000    6.87427  C   ?  A  ?   243  1
  ATOM    1955  C    .  ARG  A  266  ?   -9.25339  -41.32347   35.02657  1.000    7.50639  C   ?  A  ?   243  1
  ATOM    1956  CB   .  ARG  A  266  ?   -7.40253  -41.73481   33.40819  1.000    5.63630  C   ?  A  ?   243  1
  ATOM    1957  CG   .  ARG  A  266  ?   -6.05902  -42.35224   33.06635  1.000    8.37191  C   ?  A  ?   243  1
  ATOM    1958  CD   .  ARG  A  266  ?   -5.65264  -41.93488   31.65988  1.000   11.35586  C   ?  A  ?   243  1
  ATOM    1959  NE   .  ARG  A  266  ?   -4.43932  -42.60046   31.19178  1.000   15.41128  N   ?  A  ?   243  1
  ATOM    1960  CZ   .  ARG  A  266  ?   -3.23490  -42.04041   31.18789  1.000   12.59599  C   ?  A  ?   243  1
  ATOM    1961  NH1  .  ARG  A  266  ?   -3.07925  -40.80128   31.63105  1.000   15.86790  N   ?  A  ?   243  1
  ATOM    1962  NH2  .  ARG  A  266  ?   -2.18639  -42.71887   30.74177  1.000   12.79616  N   ?  A  ?   243  1
  ATOM    1963  O    .  THR  A  267  ?  -13.64268  -41.93419   35.98176  1.000   12.75559  O   ?  A  ?   244  1
  ATOM    1964  N    .  THR  A  267  ?  -10.38731  -41.89454   34.62484  1.000    8.87315  N   ?  A  ?   244  1
  ATOM    1965  CA   .  THR  A  267  ?  -11.68946  -41.24415   34.75433  1.000    7.95723  C   ?  A  ?   244  1
  ATOM    1966  C    .  THR  A  267  ?  -12.43102  -41.70594   36.00573  1.000    7.76886  C   ?  A  ?   244  1
  ATOM    1967  CB   .  THR  A  267  ?  -12.52293  -41.48708   33.49803  1.000    8.08340  C   ?  A  ?   244  1
  ATOM    1968  OG1  .  THR  A  267  ?  -11.68373  -41.36290   32.34520  1.000   12.18904  O   ?  A  ?   244  1
  ATOM    1969  CG2  .  THR  A  267  ?  -13.64381  -40.46127   33.38214  1.000    9.98457  C   ?  A  ?   244  1
  ATOM    1970  O    .  THR  A  268  ?  -10.40817  -40.96979   39.23179  1.000    8.35846  O   ?  A  ?   245  1
  ATOM    1971  N    .  THR  A  268  ?  -11.71544  -41.87018   37.11091  1.000    9.68168  N   ?  A  ?   245  1
  ATOM    1972  CA   .  THR  A  268  ?  -12.28366  -42.20570   38.40706  1.000   11.72957  C   ?  A  ?   245  1
  ATOM    1973  C    .  THR  A  268  ?  -11.53340  -41.41701   39.46919  1.000   10.30795  C   ?  A  ?   245  1
  ATOM    1974  CB   .  THR  A  268  ?  -12.17477  -43.70530   38.72863  1.000   11.93810  C   ?  A  ?   245  1
  ATOM    1975  OG1  .  THR  A  268  ?  -10.79647  -44.05907   38.89922  1.000   10.01889  O   ?  A  ?   245  1
  ATOM    1976  CG2  .  THR  A  268  ?  -12.78876  -44.56091   37.63213  1.000   11.42676  C   ?  A  ?   245  1
  ATOM    1977  O    .  PRO  A  269  ?   -9.17059  -40.88140   42.67751  1.000    7.43060  O   ?  A  ?   246  1
  ATOM    1978  N    .  PRO  A  269  ?  -12.12237  -41.24536   40.65705  1.000    4.53637  N   ?  A  ?   246  1
  ATOM    1979  CA   .  PRO  A  269  ?  -11.35491  -40.64405   41.76019  1.000    6.92414  C   ?  A  ?   246  1
  ATOM    1980  C    .  PRO  A  269  ?  -10.12289  -41.44547   42.12582  1.000    9.35686  C   ?  A  ?   246  1
  ATOM    1981  CB   .  PRO  A  269  ?  -12.35997  -40.61213   42.92023  1.000    3.66915  C   ?  A  ?   246  1
  ATOM    1982  CG   .  PRO  A  269  ?  -13.69758  -40.72166   42.28403  1.000    6.42448  C   ?  A  ?   246  1
  ATOM    1983  CD   .  PRO  A  269  ?  -13.50818  -41.54531   41.05117  1.000    5.78651  C   ?  A  ?   246  1
  ATOM    1984  N    .  PHE  A  270  ?  -10.10501  -42.74315   41.81836  1.000    9.13918  N   ?  A  ?   247  1
  ATOM    1985  CA   .  PHE  A  270  ?   -8.97686  -43.58886   42.17982  1.000    5.74241  C   ?  A  ?   247  1
  ATOM    1986  C    .  PHE  A  270  ?   -7.73672  -43.29002   41.35031  1.000    7.43294  C   ?  A  ?   247  1
  ATOM    1987  O    .  PHE  A  270  ?   -6.63703  -43.69530   41.73861  1.000    6.86907  O   ?  A  ?   247  1
  ATOM    1988  CB   .  PHE  A  270  ?   -9.38039  -45.05428   42.04350  1.000    6.56876  C   ?  A  ?   247  1
  ATOM    1989  CG   .  PHE  A  270  ?  -10.73146  -45.35302   42.62472  1.000    4.84615  C   ?  A  ?   247  1
  ATOM    1990  CD1  .  PHE  A  270  ?  -10.95610  -45.21748   43.98501  1.000    7.09725  C   ?  A  ?   247  1
  ATOM    1991  CD2  .  PHE  A  270  ?  -11.78025  -45.75290   41.81358  1.000    6.93676  C   ?  A  ?   247  1
  ATOM    1992  CE1  .  PHE  A  270  ?  -12.19909  -45.48169   44.52856  1.000    8.58582  C   ?  A  ?   247  1
  ATOM    1993  CE2  .  PHE  A  270  ?  -13.02578  -46.02081   42.35134  1.000    9.59747  C   ?  A  ?   247  1
  ATOM    1994  CZ   .  PHE  A  270  ?  -13.23355  -45.88503   43.71154  1.000   10.61852  C   ?  A  ?   247  1
  ATOM    1995  N    .  GLY  A  271  ?   -7.88132  -42.59533   40.22194  1.000    6.48662  N   ?  A  ?   248  1
  ATOM    1996  CA   .  GLY  A  271  ?   -6.70252  -42.12316   39.51706  1.000    7.02136  C   ?  A  ?   248  1
  ATOM    1997  C    .  GLY  A  271  ?   -5.91936  -41.11348   40.33346  1.000    7.56282  C   ?  A  ?   248  1
  ATOM    1998  O    .  GLY  A  271  ?   -4.68706  -41.08766   40.29366  1.000    9.13709  O   ?  A  ?   248  1
  ATOM    1999  N    .  ASN  A  272  ?   -6.62675  -40.27196   41.09284  1.000    9.93944  N   ?  A  ?   249  1
  ATOM    2000  CA   .  ASN  A  272  ?   -5.95607  -39.33319   41.98601  1.000    9.50922  C   ?  A  ?   249  1
  ATOM    2001  C    .  ASN  A  272  ?   -5.34535  -40.05390   43.17983  1.000    8.21066  C   ?  A  ?   249  1
  ATOM    2002  O    .  ASN  A  272  ?   -4.21163  -39.75949   43.57644  1.000    9.20457  O   ?  A  ?   249  1
  ATOM    2003  CB   .  ASN  A  272  ?   -6.93885  -38.25907   42.45047  1.000    7.15574  C   ?  A  ?   249  1
  ATOM    2004  CG   .  ASN  A  272  ?   -7.33770  -37.31795   41.33438  1.000    8.09581  C   ?  A  ?   249  1
  ATOM    2005  ND2  .  ASN  A  272  ?   -8.54108  -36.75717   41.42715  1.000    9.71003  N   ?  A  ?   249  1
  ATOM    2006  OD1  .  ASN  A  272  ?   -6.57061  -37.09600   40.39698  1.000    5.82789  O   ?  A  ?   249  1
  ATOM    2007  N    .  THR  A  273  ?   -6.08253  -41.00244   43.76252  1.000    6.36179  N   ?  A  ?   250  1
  ATOM    2008  CA   .  THR  A  273  ?   -5.54560  -41.78410   44.87171  1.000    5.53729  C   ?  A  ?   250  1
  ATOM    2009  C    .  THR  A  273  ?   -4.28068  -42.52366   44.45509  1.000    5.67204  C   ?  A  ?   250  1
  ATOM    2010  O    .  THR  A  273  ?   -3.29338  -42.55337   45.19914  1.000    6.22929  O   ?  A  ?   250  1
  ATOM    2011  CB   .  THR  A  273  ?   -6.60102  -42.76976   45.37642  1.000    6.70040  C   ?  A  ?   250  1
  ATOM    2012  OG1  .  THR  A  273  ?   -7.84800  -42.08807   45.56097  1.000   10.32627  O   ?  A  ?   250  1
  ATOM    2013  CG2  .  THR  A  273  ?   -6.16570  -43.39075   46.69763  1.000    9.87283  C   ?  A  ?   250  1
  ATOM    2014  N    .  LEU  A  274  ?   -4.29501  -43.11744   43.26035  1.000    7.96839  N   ?  A  ?   251  1
  ATOM    2015  CA   .  LEU  A  274  ?   -3.11652  -43.79533   42.73196  1.000    6.68596  C   ?  A  ?   251  1
  ATOM    2016  C    .  LEU  A  274  ?   -1.94103  -42.83526   42.60108  1.000    8.48850  C   ?  A  ?   251  1
  ATOM    2017  O    .  LEU  A  274  ?   -0.81346  -43.15513   42.99661  1.000    9.71448  O   ?  A  ?   251  1
  ATOM    2018  CB   .  LEU  A  274  ?   -3.45206  -44.41680   41.37642  1.000    9.02221  C   ?  A  ?   251  1
  ATOM    2019  CG   .  LEU  A  274  ?   -2.31546  -45.12241   40.63862  1.000    8.68567  C   ?  A  ?   251  1
  ATOM    2020  CD1  .  LEU  A  274  ?   -1.88513  -46.35154   41.41004  1.000    5.78332  C   ?  A  ?   251  1
  ATOM    2021  CD2  .  LEU  A  274  ?   -2.75085  -45.48943   39.23270  1.000    9.46463  C   ?  A  ?   251  1
  ATOM    2022  N    .  THR  A  275  ?   -2.19258  -41.64690   42.04427  1.000    6.67987  N   ?  A  ?   252  1
  ATOM    2023  CA   .  THR  A  275  ?   -1.12588  -40.67321   41.83292  1.000    8.75286  C   ?  A  ?   252  1
  ATOM    2024  C    .  THR  A  275  ?   -0.47947  -40.26528   43.15004  1.000   10.46657  C   ?  A  ?   252  1
  ATOM    2025  O    .  THR  A  275  ?    0.74909  -40.16357   43.24245  1.000   10.12766  O   ?  A  ?   252  1
  ATOM    2026  CB   .  THR  A  275  ?   -1.67538  -39.44503   41.10220  1.000    6.13499  C   ?  A  ?   252  1
  ATOM    2027  CG2  .  THR  A  275  ?   -0.56837  -38.43147   40.84931  1.000    4.15240  C   ?  A  ?   252  1
  ATOM    2028  OG1  .  THR  A  275  ?   -2.23919  -39.84582   39.84709  1.000    8.31208  O   ?  A  ?   252  1
  ATOM    2029  N    .  LEU  A  276  ?   -1.29050  -40.04495   44.18627  1.000    7.57078  N   ?  A  ?   253  1
  ATOM    2030  CA   .  LEU  A  276  ?   -0.74950  -39.59748   45.46473  1.000    7.30730  C   ?  A  ?   253  1
  ATOM    2031  C    .  LEU  A  276  ?   -0.02257  -40.71607   46.20425  1.000    7.86150  C   ?  A  ?   253  1
  ATOM    2032  O    .  LEU  A  276  ?    0.93175  -40.44719   46.94288  1.000    7.74589  O   ?  A  ?   253  1
  ATOM    2033  CB   .  LEU  A  276  ?   -1.86996  -39.01351   46.32138  1.000    4.06617  C   ?  A  ?   253  1
  ATOM    2034  CG   .  LEU  A  276  ?   -2.40555  -37.69891   45.75550  1.000    3.69662  C   ?  A  ?   253  1
  ATOM    2035  CD1  .  LEU  A  276  ?   -3.69996  -37.28943   46.43998  1.000   12.55769  C   ?  A  ?   253  1
  ATOM    2036  CD2  .  LEU  A  276  ?   -1.35882  -36.61088   45.89068  1.000    3.67758  C   ?  A  ?   253  1
  ATOM    2037  N    .  GLN  A  277  ?   -0.44531  -41.96899   46.02807  1.000    9.66248  N   ?  A  ?   254  1
  ATOM    2038  CA   .  GLN  A  277  ?    0.33479  -43.06667   46.58952  1.000    9.52122  C   ?  A  ?   254  1
  ATOM    2039  C    .  GLN  A  277  ?    1.66511  -43.20917   45.86360  1.000    8.24434  C   ?  A  ?   254  1
  ATOM    2040  O    .  GLN  A  277  ?    2.69120  -43.50221   46.48778  1.000    9.69671  O   ?  A  ?   254  1
  ATOM    2041  CB   .  GLN  A  277  ?   -0.45623  -44.37285   46.53266  1.000   12.68126  C   ?  A  ?   254  1
  ATOM    2042  CG   .  GLN  A  277  ?   -1.64414  -44.41898   47.47908  1.000   11.87271  C   ?  A  ?   254  1
  ATOM    2043  CD   .  GLN  A  277  ?   -2.22458  -45.81376   47.61099  1.000   15.70861  C   ?  A  ?   254  1
  ATOM    2044  OE1  .  GLN  A  277  ?   -1.51374  -46.80914   47.47314  1.000   16.36628  O   ?  A  ?   254  1
  ATOM    2045  NE2  .  GLN  A  277  ?   -3.52404  -45.89237   47.87280  1.000   17.33671  N   ?  A  ?   254  1
  ATOM    2046  N    .  MET  A  278  ?    1.66648  -42.99784   44.54427  1.000    5.90369  N   ?  A  ?   255  1
  ATOM    2047  CA   .  MET  A  278  ?    2.91768  -42.99068   43.79420  1.000    8.04357  C   ?  A  ?   255  1
  ATOM    2048  C    .  MET  A  278  ?    3.82281  -41.85338   44.25173  1.000   11.48334  C   ?  A  ?   255  1
  ATOM    2049  O    .  MET  A  278  ?    5.04365  -42.02098   44.34819  1.000   10.27473  O   ?  A  ?   255  1
  ATOM    2050  CB   .  MET  A  278  ?    2.62618  -42.88492   42.29677  1.000    7.79428  C   ?  A  ?   255  1
  ATOM    2051  CG   .  MET  A  278  ?    3.86104  -42.76657   41.41883  1.000   11.82029  C   ?  A  ?   255  1
  ATOM    2052  SD   .  MET  A  278  ?    4.93206  -44.21657   41.42813  1.000   14.03625  S   ?  A  ?   255  1
  ATOM    2053  CE   .  MET  A  278  ?    6.17823  -43.68984   40.25440  1.000   11.03985  C   ?  A  ?   255  1
  ATOM    2054  N    .  ALA  A  279  ?    3.24094  -40.69004   44.55184  1.000    8.07991  N   ?  A  ?   256  1
  ATOM    2055  CA   .  ALA  A  279  ?    4.04355  -39.57410   45.04048  1.000    7.11442  C   ?  A  ?   256  1
  ATOM    2056  C    .  ALA  A  279  ?    4.63957  -39.87781   46.41134  1.000    8.30485  C   ?  A  ?   256  1
  ATOM    2057  O    .  ALA  A  279  ?    5.77474  -39.48094   46.69859  1.000    5.33153  O   ?  A  ?   256  1
  ATOM    2058  CB   .  ALA  A  279  ?    3.20083  -38.29954   45.08101  1.000    7.12215  C   ?  A  ?   256  1
  ATOM    2059  N    .  ASP  A  280  ?    3.89177  -40.57880   47.27139  1.000    8.92187  N   ?  A  ?   257  1
  ATOM    2060  CA   .  ASP  A  280  ?    4.44136  -40.99231   48.56053  1.000   10.42251  C   ?  A  ?   257  1
  ATOM    2061  C    .  ASP  A  280  ?    5.59478  -41.96688   48.37394  1.000   11.26831  C   ?  A  ?   257  1
  ATOM    2062  O    .  ASP  A  280  ?    6.58503  -41.92247   49.11287  1.000    6.96909  O   ?  A  ?   257  1
  ATOM    2063  CB   .  ASP  A  280  ?    3.35901  -41.63594   49.42442  1.000   13.54318  C   ?  A  ?   257  1
  ATOM    2064  CG   .  ASP  A  280  ?    2.20869  -40.70421   49.71762  1.000   13.07024  C   ?  A  ?   257  1
  ATOM    2065  OD1  .  ASP  A  280  ?    2.43124  -39.47859   49.81433  1.000   12.16112  O   ?  A  ?   257  1
  ATOM    2066  OD2  .  ASP  A  280  ?    1.07393  -41.20522   49.85756  1.000   15.84932  O   ?  A  ?   257  1
  ATOM    2067  N    .  ALA  A  281  ?    5.47422  -42.86873   47.39913  1.000   12.60488  N   ?  A  ?   258  1
  ATOM    2068  CA   .  ALA  A  281  ?    6.56712  -43.78376   47.10054  1.000   10.85566  C   ?  A  ?   258  1
  ATOM    2069  C    .  ALA  A  281  ?    7.78934  -43.03891   46.58321  1.000    9.90512  C   ?  A  ?   258  1
  ATOM    2070  O    .  ALA  A  281  ?    8.92342  -43.46626   46.82648  1.000    7.62507  O   ?  A  ?   258  1
  ATOM    2071  CB   .  ALA  A  281  ?    6.10955  -44.83219   46.08639  1.000   11.34859  C   ?  A  ?   258  1
  ATOM    2072  N    .  ALA  A  282  ?    7.58194  -41.92710   45.87405  1.000    9.97058  N   ?  A  ?   259  1
  ATOM    2073  CA   .  ALA  A  282  ?    8.71242  -41.14501   45.38609  1.000    9.84928  C   ?  A  ?   259  1
  ATOM    2074  C    .  ALA  A  282  ?    9.42481  -40.43568   46.52739  1.000    8.79222  C   ?  A  ?   259  1
  ATOM    2075  O    .  ALA  A  282  ?   10.65835  -40.35197   46.53621  1.000    8.44736  O   ?  A  ?   259  1
  ATOM    2076  CB   .  ALA  A  282  ?    8.24735  -40.13435   44.33942  1.000   11.14314  C   ?  A  ?   259  1
  ATOM    2077  N    .  ILE  A  283  ?    8.66470  -39.91070   47.49233  1.000    9.55347  N   ?  A  ?   260  1
  ATOM    2078  CA   .  ILE  A  283  ?    9.27175  -39.25942   48.65114  1.000   11.25172  C   ?  A  ?   260  1
  ATOM    2079  C    .  ILE  A  283  ?   10.19442  -40.22997   49.37540  1.000   13.19415  C   ?  A  ?   260  1
  ATOM    2080  O    .  ILE  A  283  ?   11.33223  -39.89315   49.72434  1.000   14.01357  O   ?  A  ?   260  1
  ATOM    2081  CB   .  ILE  A  283  ?    8.18537  -38.70852   49.59359  1.000   14.76371  C   ?  A  ?   260  1
  ATOM    2082  CG1  .  ILE  A  283  ?    7.39649  -37.59059   48.91206  1.000   13.17714  C   ?  A  ?   260  1
  ATOM    2083  CG2  .  ILE  A  283  ?    8.80471  -38.21288   50.89741  1.000   16.41414  C   ?  A  ?   260  1
  ATOM    2084  CD1  .  ILE  A  283  ?    6.31049  -37.01061   49.77620  1.000   16.33359  C   ?  A  ?   260  1
  ATOM    2085  N    .  ASP  A  284  ?    9.72261  -41.45893   49.59415  1.000   12.78166  N   ?  A  ?   261  1
  ATOM    2086  CA   .  ASP  A  284  ?   10.52422  -42.44805   50.30443  1.000   13.56412  C   ?  A  ?   261  1
  ATOM    2087  C    .  ASP  A  284  ?   11.62987  -43.01396   49.42293  1.000   11.35984  C   ?  A  ?   261  1
  ATOM    2088  O    .  ASP  A  284  ?   12.75827  -43.20724   49.88722  1.000   16.25353  O   ?  A  ?   261  1
  ATOM    2089  CB   .  ASP  A  284  ?    9.62731  -43.57121   50.82106  1.000   18.49120  C   ?  A  ?   261  1
  ATOM    2090  CG   .  ASP  A  284  ?    8.56757  -43.07272   51.78169  1.000   24.80454  C   ?  A  ?   261  1
  ATOM    2091  OD1  .  ASP  A  284  ?    8.85962  -42.13826   52.55740  1.000   25.56066  O   ?  A  ?   261  1
  ATOM    2092  OD2  .  ASP  A  284  ?    7.44011  -43.61179   51.75949  1.000   28.93721  O   ?  A  ?   261  1
  ATOM    2093  N    .  GLY  A  285  ?   11.32692  -43.28081   48.15123  1.000   10.50574  N   ?  A  ?   262  1
  ATOM    2094  CA   .  GLY  A  285  ?   12.30750  -43.86486   47.25465  1.000   10.15529  C   ?  A  ?   262  1
  ATOM    2095  C    .  GLY  A  285  ?   13.48253  -42.96238   46.94711  1.000   12.72511  C   ?  A  ?   262  1
  ATOM    2096  O    .  GLY  A  285  ?   14.54572  -43.46009   46.56349  1.000   14.14687  O   ?  A  ?   262  1
  ATOM    2097  N    .  ASN  A  286  ?   13.31737  -41.64763   47.10400  1.000   12.74234  N   ?  A  ?   263  1
  ATOM    2098  CA   .  ASN  A  286  ?   14.38565  -40.69061   46.84079  1.000   14.13401  C   ?  A  ?   263  1
  ATOM    2099  C    .  ASN  A  286  ?   14.82364  -39.93661   48.08944  1.000   15.33131  C   ?  A  ?   263  1
  ATOM    2100  O    .  ASN  A  286  ?   15.63062  -39.00558   47.98021  1.000   17.05999  O   ?  A  ?   263  1
  ATOM    2101  CB   .  ASN  A  286  ?   13.96013  -39.68901   45.76220  1.000   10.81823  C   ?  A  ?   263  1
  ATOM    2102  CG   .  ASN  A  286  ?   13.70140  -40.34721   44.42400  1.000   14.50616  C   ?  A  ?   263  1
  ATOM    2103  OD1  .  ASN  A  286  ?   14.61085  -40.50591   43.60841  1.000   14.63640  O   ?  A  ?   263  1
  ATOM    2104  ND2  .  ASN  A  286  ?   12.45302  -40.72899   44.18744  1.000   13.35950  N   ?  A  ?   263  1
  ATOM    2105  N    .  GLN  A  287  ?   14.32644  -40.31580   49.26711  1.000   16.48600  N   ?  A  ?   264  1
  ATOM    2106  CA   .  GLN  A  287  ?   14.66255  -39.64120   50.52016  1.000   17.08907  C   ?  A  ?   264  1
  ATOM    2107  C    .  GLN  A  287  ?   14.39837  -38.14144   50.41430  1.000   18.79806  C   ?  A  ?   264  1
  ATOM    2108  O    .  GLN  A  287  ?   15.22335  -37.30549   50.78557  1.000   17.66835  O   ?  A  ?   264  1
  ATOM    2109  CB   .  GLN  A  287  ?   16.11259  -39.91293   50.92490  1.000   19.21192  C   ?  A  ?   264  1
  ATOM    2110  CG   .  GLN  A  287  ?   16.43337  -41.37343   51.20341  1.000   24.72746  C   ?  A  ?   264  1
  ATOM    2111  CD   .  GLN  A  287  ?   16.67172  -42.18445   49.94091  1.000   30.25416  C   ?  A  ?   264  1
  ATOM    2112  NE2  .  GLN  A  287  ?   17.22847  -41.54498   48.91778  1.000   29.82639  N   ?  A  ?   264  1
  ATOM    2113  OE1  .  GLN  A  287  ?   16.36699  -43.37580   49.89155  1.000   35.05115  O   ?  A  ?   264  1
  ATOM    2114  N    .  MET  A  288  ?   13.23114  -37.80059   49.88436  1.000   18.34332  N   ?  A  ?   265  1
  ATOM    2115  CA   .  MET  A  288  ?   12.88568  -36.40432   49.66217  1.000   13.02980  C   ?  A  ?   265  1
  ATOM    2116  C    .  MET  A  288  ?   12.50838  -35.75161   50.98504  1.000   13.89337  C   ?  A  ?   265  1
  ATOM    2117  O    .  MET  A  288  ?   11.60954  -36.22560   51.68996  1.000   14.70453  O   ?  A  ?   265  1
  ATOM    2118  CB   .  MET  A  288  ?   11.75113  -36.29170   48.64857  1.000    9.00180  C   ?  A  ?   265  1
  ATOM    2119  CG   .  MET  A  288  ?   12.07693  -36.96126   47.32873  1.000    8.16800  C   ?  A  ?   265  1
  ATOM    2120  SD   .  MET  A  288  ?   10.86244  -36.65189   46.03954  1.000   12.65009  S   ?  A  ?   265  1
  ATOM    2121  CE   .  MET  A  288  ?   11.30871  -34.98568   45.55458  1.000    8.03234  C   ?  A  ?   265  1
  ATOM    2122  O    .  GLY  A  289  ?   13.12584  -33.82078   54.85000  1.000   18.31938  O   ?  A  ?   266  1
  ATOM    2123  N    .  GLY  A  289  ?   13.21170  -34.67763   51.32684  1.000   14.25877  N   ?  A  ?   266  1
  ATOM    2124  CA   .  GLY  A  289  ?   12.88844  -33.88986   52.49401  1.000   13.38439  C   ?  A  ?   266  1
  ATOM    2125  C    .  GLY  A  289  ?   13.53109  -34.31954   53.79386  1.000   17.12996  C   ?  A  ?   266  1
  ATOM    2126  O    .  VAL  A  290  ?   16.51509  -34.59654   56.64368  1.000   24.53360  O   ?  A  ?   267  1
  ATOM    2127  N    .  VAL  A  290  ?   14.52039  -35.21189   53.76763  1.000   18.79642  N   ?  A  ?   267  1
  ATOM    2128  CA   .  VAL  A  290  ?   15.09434  -35.65748   55.03401  1.000   22.43736  C   ?  A  ?   267  1
  ATOM    2129  C    .  VAL  A  290  ?   16.30965  -34.82366   55.44746  1.000   23.09295  C   ?  A  ?   267  1
  ATOM    2130  CB   .  VAL  A  290  ?   15.42433  -37.16627   55.01315  1.000   25.50478  C   ?  A  ?   267  1
  ATOM    2131  CG1  .  VAL  A  290  ?   14.83414  -37.85320   53.79356  1.000   26.07154  C   ?  A  ?   267  1
  ATOM    2132  CG2  .  VAL  A  290  ?   16.91263  -37.43313   55.17028  1.000   27.50272  C   ?  A  ?   267  1
  ATOM    2133  O    .  ASP  A  291  ?   16.72614  -31.67392   54.23246  1.000   22.31276  O   ?  A  ?   268  1
  ATOM    2134  N    .  ASP  A  291  ?   17.11097  -34.33284   54.50243  1.000   23.79228  N   ?  A  ?   268  1
  ATOM    2135  CA   .  ASP  A  291  ?   18.21754  -33.46361   54.87206  1.000   22.42865  C   ?  A  ?   268  1
  ATOM    2136  C    .  ASP  A  291  ?   17.87112  -32.00957   54.54670  1.000   21.53933  C   ?  A  ?   268  1
  ATOM    2137  CB   .  ASP  A  291  ?   19.52419  -33.92349   54.21011  1.000   23.67945  C   ?  A  ?   268  1
  ATOM    2138  CG   .  ASP  A  291  ?   19.50720  -33.81941   52.69177  1.000   25.52425  C   ?  A  ?   268  1
  ATOM    2139  OD1  .  ASP  A  291  ?   18.65215  -33.11381   52.11786  1.000   24.44998  O   ?  A  ?   268  1
  ATOM    2140  OD2  .  ASP  A  291  ?   20.38488  -34.44645   52.06222  1.000   28.41329  O   ?  A  ?   268  1
  ATOM    2141  N    .  ASP  A  292  ?   18.87045  -31.13208   54.61446  1.000   22.25888  N   ?  A  ?   269  1
  ATOM    2142  CA   .  ASP  A  292  ?   18.63791  -29.70270   54.45815  1.000   27.21831  C   ?  A  ?   269  1
  ATOM    2143  C    .  ASP  A  292  ?   18.71566  -29.22261   53.01621  1.000   25.83358  C   ?  A  ?   269  1
  ATOM    2144  O    .  ASP  A  292  ?   18.42937  -28.04898   52.75834  1.000   24.27913  O   ?  A  ?   269  1
  ATOM    2145  CB   .  ASP  A  292  ?   19.63317  -28.90867   55.30862  1.000   32.86329  C   ?  A  ?   269  1
  ATOM    2146  CG   .  ASP  A  292  ?   19.30118  -28.95892   56.78388  1.000   38.32991  C   ?  A  ?   269  1
  ATOM    2147  OD1  .  ASP  A  292  ?   18.22398  -29.48527   57.12938  1.000   42.23100  O   ?  A  ?   269  1
  ATOM    2148  OD2  .  ASP  A  292  ?   20.10677  -28.46317   57.59746  1.000   37.81561  O   ?  A  ?   269  1
  ATOM    2149  N    .  ILE  A  293  ?   19.09203  -30.08200   52.07687  1.000   22.77181  N   ?  A  ?   270  1
  ATOM    2150  CA   .  ILE  A  293  ?   19.12937  -29.69494   50.67149  1.000   17.42901  C   ?  A  ?   270  1
  ATOM    2151  C    .  ILE  A  293  ?   17.71387  -29.78103   50.11839  1.000   12.69681  C   ?  A  ?   270  1
  ATOM    2152  O    .  ILE  A  293  ?   17.08874  -30.84494   50.15647  1.000   12.32014  O   ?  A  ?   270  1
  ATOM    2153  CB   .  ILE  A  293  ?   20.09866  -30.58106   49.87988  1.000   17.21092  C   ?  A  ?   270  1
  ATOM    2154  CG1  .  ILE  A  293  ?   21.48278  -30.52496   50.52596  1.000   19.63361  C   ?  A  ?   270  1
  ATOM    2155  CG2  .  ILE  A  293  ?   20.16605  -30.13181   48.42846  1.000   18.80008  C   ?  A  ?   270  1
  ATOM    2156  CD1  .  ILE  A  293  ?   22.50454  -31.40920   49.86538  1.000   24.76722  C   ?  A  ?   270  1
  ATOM    2157  N    .  THR  A  294  ?   17.20385  -28.65845   49.61428  1.000    8.22722  N   ?  A  ?   271  1
  ATOM    2158  CA   .  THR  A  294  ?   15.80029  -28.58009   49.22882  1.000    5.68986  C   ?  A  ?   271  1
  ATOM    2159  C    .  THR  A  294  ?   15.49894  -29.51506   48.06649  1.000    7.57560  C   ?  A  ?   271  1
  ATOM    2160  O    .  THR  A  294  ?   16.16716  -29.47712   47.03074  1.000   10.70945  O   ?  A  ?   271  1
  ATOM    2161  CB   .  THR  A  294  ?   15.42757  -27.14746   48.84635  1.000    8.26646  C   ?  A  ?   271  1
  ATOM    2162  CG2  .  THR  A  294  ?   13.93435  -27.04275   48.58311  1.000    7.57442  C   ?  A  ?   271  1
  ATOM    2163  OG1  .  THR  A  294  ?   15.78325  -26.25212   49.90556  1.000   12.76215  O   ?  A  ?   271  1
  ATOM    2164  N    .  ASP  A  295  ?   14.48092  -30.34778   48.24200  1.000    7.12807  N   ?  A  ?   272  1
  ATOM    2165  CA   .  ASP  A  295  ?   13.98085  -31.22445   47.19736  1.000    8.91026  C   ?  A  ?   272  1
  ATOM    2166  C    .  ASP  A  295  ?   12.65548  -30.68882   46.66869  1.000    7.99953  C   ?  A  ?   272  1
  ATOM    2167  O    .  ASP  A  295  ?   11.98444  -29.88045   47.31411  1.000    9.54070  O   ?  A  ?   272  1
  ATOM    2168  CB   .  ASP  A  295  ?   13.81686  -32.65445   47.72298  1.000    9.49878  C   ?  A  ?   272  1
  ATOM    2169  CG   .  ASP  A  295  ?   15.13017  -33.24626   48.21926  1.000   13.16080  C   ?  A  ?   272  1
  ATOM    2170  OD1  .  ASP  A  295  ?   16.16809  -33.03498   47.55545  1.000   15.56586  O   ?  A  ?   272  1
  ATOM    2171  OD2  .  ASP  A  295  ?   15.12582  -33.90828   49.27802  1.000   14.39390  O   ?  A  ?   272  1
  ATOM    2172  N    .  PHE  A  296  ?   12.27867  -31.15376   45.48046  1.000    6.12809  N   ?  A  ?   273  1
  ATOM    2173  CA   .  PHE  A  296  ?   11.10842  -30.63391   44.78153  1.000    7.03233  C   ?  A  ?   273  1
  ATOM    2174  C    .  PHE  A  296  ?   10.32090  -31.80052   44.20448  1.000    9.60965  C   ?  A  ?   273  1
  ATOM    2175  O    .  PHE  A  296  ?   10.83216  -32.54177   43.36015  1.000    6.94614  O   ?  A  ?   273  1
  ATOM    2176  CB   .  PHE  A  296  ?   11.52740  -29.65317   43.67687  1.000    7.20039  C   ?  A  ?   273  1
  ATOM    2177  CG   .  PHE  A  296  ?   10.51409  -28.57069   43.39201  1.000    9.54020  C   ?  A  ?   273  1
  ATOM    2178  CD1  .  PHE  A  296  ?   10.92498  -27.26584   43.15959  1.000    9.16496  C   ?  A  ?   273  1
  ATOM    2179  CD2  .  PHE  A  296  ?    9.15841  -28.85706   43.33999  1.000   10.93482  C   ?  A  ?   273  1
  ATOM    2180  CE1  .  PHE  A  296  ?   10.00382  -26.26813   42.89222  1.000   10.18910  C   ?  A  ?   273  1
  ATOM    2181  CE2  .  PHE  A  296  ?    8.23220  -27.86475   43.06909  1.000    9.35657  C   ?  A  ?   273  1
  ATOM    2182  CZ   .  PHE  A  296  ?    8.65730  -26.56828   42.84566  1.000   11.68336  C   ?  A  ?   273  1
  ATOM    2183  N    .  LEU  A  297  ?    9.08381  -31.95991   44.66565  1.000    8.07187  N   ?  A  ?   274  1
  ATOM    2184  CA   .  LEU  A  297  ?    8.15860  -32.97440   44.17521  1.000    8.89591  C   ?  A  ?   274  1
  ATOM    2185  C    .  LEU  A  297  ?    7.01885  -32.27642   43.44754  1.000   12.43414  C   ?  A  ?   274  1
  ATOM    2186  O    .  LEU  A  297  ?    6.35743  -31.40644   44.02226  1.000   16.29988  O   ?  A  ?   274  1
  ATOM    2187  CB   .  LEU  A  297  ?    7.61373  -33.81535   45.32990  1.000    5.79387  C   ?  A  ?   274  1
  ATOM    2188  CG   .  LEU  A  297  ?    6.55555  -34.87174   45.01406  1.000    4.64561  C   ?  A  ?   274  1
  ATOM    2189  CD1  .  LEU  A  297  ?    7.15991  -36.00547   44.20027  1.000    8.04896  C   ?  A  ?   274  1
  ATOM    2190  CD2  .  LEU  A  297  ?    5.92847  -35.40219   46.29128  1.000    5.03444  C   ?  A  ?   274  1
  ATOM    2191  N    .  THR  A  298  ?    6.79315  -32.64491   42.19107  1.000    9.27549  N   ?  A  ?   275  1
  ATOM    2192  CA   .  THR  A  298  ?    5.67796  -32.11374   41.41835  1.000   11.96556  C   ?  A  ?   275  1
  ATOM    2193  C    .  THR  A  298  ?    4.70124  -33.24454   41.12651  1.000   11.20689  C   ?  A  ?   275  1
  ATOM    2194  O    .  THR  A  298  ?    5.10027  -34.29900   40.62431  1.000   10.92942  O   ?  A  ?   275  1
  ATOM    2195  CB   .  THR  A  298  ?    6.15734  -31.46096   40.11397  1.000   13.34307  C   ?  A  ?   275  1
  ATOM    2196  OG1  .  THR  A  298  ?    6.41412  -32.46806   39.12999  1.000   13.23534  O   ?  A  ?   275  1
  ATOM    2197  CG2  .  THR  A  298  ?    7.44116  -30.66663   40.34616  1.000   12.92086  C   ?  A  ?   275  1
  ATOM    2198  N    .  VAL  A  299  ?    3.43013  -33.04124   41.45936  1.000   11.28556  N   ?  A  ?   276  1
  ATOM    2199  CA   .  VAL  A  299  ?    2.41335  -34.04761   41.17950  1.000   13.72540  C   ?  A  ?   276  1
  ATOM    2200  C    .  VAL  A  299  ?    1.17050  -33.36060   40.62856  1.000   13.06432  C   ?  A  ?   276  1
  ATOM    2201  O    .  VAL  A  299  ?    0.66298  -32.39700   41.21383  1.000   10.83875  O   ?  A  ?   276  1
  ATOM    2202  CB   .  VAL  A  299  ?    2.09378  -34.91861   42.41628  1.000   13.49752  C   ?  A  ?   276  1
  ATOM    2203  CG1  .  VAL  A  299  ?    2.62928  -34.29710   43.69696  1.000   16.10348  C   ?  A  ?   276  1
  ATOM    2204  CG2  .  VAL  A  299  ?    0.61159  -35.25986   42.50637  1.000   10.41073  C   ?  A  ?   276  1
  ATOM    2205  N    .  ASN  A  300  ?    0.72200  -33.82984   39.46888  1.000   12.00043  N   ?  A  ?   277  1
  ATOM    2206  CA   .  ASN  A  300  ?   -0.51649  -33.39572   38.84144  1.000    9.42713  C   ?  A  ?   277  1
  ATOM    2207  C    .  ASN  A  300  ?   -1.60489  -34.41066   39.15632  1.000   10.03459  C   ?  A  ?   277  1
  ATOM    2208  O    .  ASN  A  300  ?   -1.39026  -35.61787   39.00675  1.000   11.21506  O   ?  A  ?   277  1
  ATOM    2209  CB   .  ASN  A  300  ?   -0.33360  -33.26777   37.32888  1.000   10.53863  C   ?  A  ?   277  1
  ATOM    2210  CG   .  ASN  A  300  ?   -1.62019  -33.49935   36.56008  1.000    9.16268  C   ?  A  ?   277  1
  ATOM    2211  OD1  .  ASN  A  300  ?   -1.94337  -34.62601   36.18631  1.000    9.91696  O   ?  A  ?   277  1
  ATOM    2212  ND2  .  ASN  A  300  ?   -2.35315  -32.42834   36.30778  1.000    9.60009  N   ?  A  ?   277  1
  ATOM    2213  N    .  LEU  A  301  ?   -2.75925  -33.92431   39.60482  1.000    7.59504  N   ?  A  ?   278  1
  ATOM    2214  CA   .  LEU  A  301  ?   -3.92202  -34.76715   39.87848  1.000    4.97804  C   ?  A  ?   278  1
  ATOM    2215  C    .  LEU  A  301  ?   -4.82033  -34.71694   38.64757  1.000    7.73842  C   ?  A  ?   278  1
  ATOM    2216  O    .  LEU  A  301  ?   -5.61699  -33.79031   38.48673  1.000    6.85510  O   ?  A  ?   278  1
  ATOM    2217  CB   .  LEU  A  301  ?   -4.65842  -34.29996   41.12988  1.000    9.19483  C   ?  A  ?   278  1
  ATOM    2218  CG   .  LEU  A  301  ?   -4.02187  -34.59398   42.49211  1.000   10.54086  C   ?  A  ?   278  1
  ATOM    2219  CD1  .  LEU  A  301  ?   -3.09189  -33.47811   42.93569  1.000   13.02823  C   ?  A  ?   278  1
  ATOM    2220  CD2  .  LEU  A  301  ?   -3.28997  -35.92161   42.46499  1.000   10.02399  C   ?  A  ?   278  1
  ATOM    2221  N    .  ALA  A  302  ?   -4.69699  -35.72486   37.78072  1.000    8.67044  N   ?  A  ?   279  1
  ATOM    2222  CA   .  ALA  A  302  ?   -5.30409  -35.65484   36.45611  1.000   10.63379  C   ?  A  ?   279  1
  ATOM    2223  C    .  ALA  A  302  ?   -6.76247  -36.09672   36.42137  1.000   11.46715  C   ?  A  ?   279  1
  ATOM    2224  O    .  ALA  A  302  ?   -7.47848  -35.72520   35.48511  1.000    9.12662  O   ?  A  ?   279  1
  ATOM    2225  CB   .  ALA  A  302  ?   -4.49998  -36.50086   35.46662  1.000    9.10367  C   ?  A  ?   279  1
  ATOM    2226  N    .  SER  A  303  ?   -7.22113  -36.87207   37.40818  1.000   13.65412  N   ?  A  ?   280  1
  ATOM    2227  CA   .  SER  A  303  ?   -8.54033  -37.49239   37.30454  1.000   11.22817  C   ?  A  ?   280  1
  ATOM    2228  C    .  SER  A  303  ?   -9.66917  -36.47667   37.39184  1.000    6.99298  C   ?  A  ?   280  1
  ATOM    2229  O    .  SER  A  303  ?  -10.76274  -36.73152   36.87601  1.000    5.21045  O   ?  A  ?   280  1
  ATOM    2230  CB   .  SER  A  303  ?   -8.70900  -38.55723   38.38351  1.000   11.30482  C   ?  A  ?   280  1
  ATOM    2231  OG   .  SER  A  303  ?   -7.91181  -39.68785   38.08866  1.000   12.79350  O   ?  A  ?   280  1
  ATOM    2232  N    .  THR  A  304  ?   -9.43680  -35.33564   38.04517  1.000    9.24932  N   ?  A  ?   281  1
  ATOM    2233  CA   .  THR  A  304  ?  -10.44400  -34.27964   38.04971  1.000    7.63785  C   ?  A  ?   281  1
  ATOM    2234  C    .  THR  A  304  ?  -10.68451  -33.74731   36.64473  1.000    8.11027  C   ?  A  ?   281  1
  ATOM    2235  O    .  THR  A  304  ?  -11.77441  -33.24729   36.34210  1.000   10.72220  O   ?  A  ?   281  1
  ATOM    2236  CB   .  THR  A  304  ?  -10.01695  -33.14656   38.98388  1.000    7.16226  C   ?  A  ?   281  1
  ATOM    2237  CG2  .  THR  A  304  ?  -10.08205  -33.59966   40.43492  1.000    6.28588  C   ?  A  ?   281  1
  ATOM    2238  OG1  .  THR  A  304  ?   -8.67436  -32.75201   38.67784  1.000    8.23797  O   ?  A  ?   281  1
  ATOM    2239  N    .  ASP  A  305  ?   -9.68170  -33.85552   35.77460  1.000    6.60092  N   ?  A  ?   282  1
  ATOM    2240  CA   .  ASP  A  305  ?   -9.83524  -33.42844   34.39078  1.000    8.54850  C   ?  A  ?   282  1
  ATOM    2241  C    .  ASP  A  305  ?  -10.56582  -34.47390   33.56188  1.000    9.47728  C   ?  A  ?   282  1
  ATOM    2242  O    .  ASP  A  305  ?  -11.45975  -34.13536   32.77837  1.000   10.48309  O   ?  A  ?   282  1
  ATOM    2243  CB   .  ASP  A  305  ?   -8.46610  -33.13877   33.78482  1.000   10.59015  C   ?  A  ?   282  1
  ATOM    2244  CG   .  ASP  A  305  ?   -8.55113  -32.68280   32.34805  1.000    9.85283  C   ?  A  ?   282  1
  ATOM    2245  OD1  .  ASP  A  305  ?   -8.95840  -31.52421   32.11822  1.000    9.94826  O   ?  A  ?   282  1
  ATOM    2246  OD2  .  ASP  A  305  ?   -8.20471  -33.48348   31.45335  1.000   12.87338  O   ?  A  ?   282  1
  ATOM    2247  N    .  TYR  A  306  ?  -10.18659  -35.74407   33.70847  1.000    9.51501  N   ?  A  ?   283  1
  ATOM    2248  CA   .  TYR  A  306  ?  -10.87205  -36.80612   32.98184  1.000    8.98229  C   ?  A  ?   283  1
  ATOM    2249  C    .  TYR  A  306  ?  -12.33389  -36.89387   33.39657  1.000    8.55116  C   ?  A  ?   283  1
  ATOM    2250  O    .  TYR  A  306  ?  -13.22861  -36.96222   32.54651  1.000    9.40922  O   ?  A  ?   283  1
  ATOM    2251  CB   .  TYR  A  306  ?  -10.16174  -38.13810   33.20695  1.000   10.47488  C   ?  A  ?   283  1
  ATOM    2252  CG   .  TYR  A  306  ?   -8.85487  -38.24932   32.46051  1.000    9.97099  C   ?  A  ?   283  1
  ATOM    2253  CD1  .  TYR  A  306  ?   -8.83849  -38.50588   31.09781  1.000    9.79513  C   ?  A  ?   283  1
  ATOM    2254  CD2  .  TYR  A  306  ?   -7.63855  -38.09735   33.11412  1.000   11.09901  C   ?  A  ?   283  1
  ATOM    2255  CE1  .  TYR  A  306  ?   -7.64994  -38.60957   30.40314  1.000   11.70866  C   ?  A  ?   283  1
  ATOM    2256  CE2  .  TYR  A  306  ?   -6.44249  -38.20313   32.42681  1.000   14.70690  C   ?  A  ?   283  1
  ATOM    2257  CZ   .  TYR  A  306  ?   -6.45641  -38.45649   31.06931  1.000   14.90312  C   ?  A  ?   283  1
  ATOM    2258  OH   .  TYR  A  306  ?   -5.27592  -38.56495   30.37177  1.000   19.97494  O   ?  A  ?   283  1
  ATOM    2259  N    .  VAL  A  307  ?  -12.59782  -36.87618   34.70460  1.000    5.25826  N   ?  A  ?   284  1
  ATOM    2260  CA   .  VAL  A  307  ?  -13.97943  -36.91131   35.17807  1.000    6.26599  C   ?  A  ?   284  1
  ATOM    2261  C    .  VAL  A  307  ?  -14.73572  -35.67851   34.69778  1.000    9.42142  C   ?  A  ?   284  1
  ATOM    2262  O    .  VAL  A  307  ?  -15.85992  -35.77661   34.19282  1.000   11.26853  O   ?  A  ?   284  1
  ATOM    2263  CB   .  VAL  A  307  ?  -14.02362  -37.04307   36.71096  1.000    6.25536  C   ?  A  ?   284  1
  ATOM    2264  CG1  .  VAL  A  307  ?  -15.44764  -36.87366   37.20878  1.000    5.43448  C   ?  A  ?   284  1
  ATOM    2265  CG2  .  VAL  A  307  ?  -13.46987  -38.39466   37.13915  1.000    6.93613  C   ?  A  ?   284  1
  ATOM    2266  N    .  GLY  A  308  ?  -14.12218  -34.50000   34.83379  1.000   10.85123  N   ?  A  ?   285  1
  ATOM    2267  CA   .  GLY  A  308  ?  -14.78047  -33.27916   34.39499  1.000   11.26113  C   ?  A  ?   285  1
  ATOM    2268  C    .  GLY  A  308  ?  -15.08137  -33.27675   32.90824  1.000   12.92001  C   ?  A  ?   285  1
  ATOM    2269  O    .  GLY  A  308  ?  -16.15643  -32.84715   32.48334  1.000   14.01228  O   ?  A  ?   285  1
  ATOM    2270  N    .  HIS  A  309  ?  -14.13888  -33.76614   32.09876  1.000   10.55330  N   ?  A  ?   286  1
  ATOM    2271  CA   .  HIS  A  309  ?  -14.35022  -33.82546   30.65521  1.000    8.86995  C   ?  A  ?   286  1
  ATOM    2272  C    .  HIS  A  309  ?  -15.55531  -34.68143   30.30161  1.000   11.13850  C   ?  A  ?   286  1
  ATOM    2273  O    .  HIS  A  309  ?  -16.27610  -34.38945   29.34027  1.000   14.39633  O   ?  A  ?   286  1
  ATOM    2274  CB   .  HIS  A  309  ?  -13.10853  -34.38097   29.96723  1.000    9.76772  C   ?  A  ?   286  1
  ATOM    2275  CG   .  HIS  A  309  ?  -12.12492  -33.33326   29.56290  1.000   10.86631  C   ?  A  ?   286  1
  ATOM    2276  CD2  .  HIS  A  309  ?  -10.87247  -33.06936   30.00157  1.000   10.69908  C   ?  A  ?   286  1
  ATOM    2277  ND1  .  HIS  A  309  ?  -12.38816  -32.41057   28.57437  1.000   10.76382  N   ?  A  ?   286  1
  ATOM    2278  CE1  .  HIS  A  309  ?  -11.34232  -31.61758   28.42679  1.000   10.61495  C   ?  A  ?   286  1
  ATOM    2279  NE2  .  HIS  A  309  ?  -10.40861  -31.99720   29.27963  1.000    9.22959  N   ?  A  ?   286  1
  ATOM    2280  N    .  ASN  A  310  ?  -15.78073  -35.75074   31.05808  1.000    7.14456  N   ?  A  ?   287  1
  ATOM    2281  CA   .  ASN  A  310  ?  -16.82733  -36.70529   30.72558  1.000   12.68319  C   ?  A  ?   287  1
  ATOM    2282  C    .  ASN  A  310  ?  -18.18683  -36.31535   31.28418  1.000   11.05195  C   ?  A  ?   287  1
  ATOM    2283  O    .  ASN  A  310  ?  -19.20783  -36.57699   30.63946  1.000   10.09148  O   ?  A  ?   287  1
  ATOM    2284  CB   .  ASN  A  310  ?  -16.44090  -38.09572   31.23484  1.000   17.31519  C   ?  A  ?   287  1
  ATOM    2285  CG   .  ASN  A  310  ?  -17.15740  -39.20191   30.49744  1.000   25.93367  C   ?  A  ?   287  1
  ATOM    2286  OD1  .  ASN  A  310  ?  -17.01385  -39.34642   29.28280  1.000   29.37532  O   ?  A  ?   287  1
  ATOM    2287  ND2  .  ASN  A  310  ?  -17.92532  -40.00039   31.22903  1.000   28.46990  N   ?  A  ?   287  1
  ATOM    2288  N    .  PHE  A  311  ?  -18.22613  -35.68544   32.45495  1.000   11.96566  N   ?  A  ?   288  1
  ATOM    2289  CA   .  PHE  A  311  ?  -19.47933  -35.43407   33.15066  1.000   12.01322  C   ?  A  ?   288  1
  ATOM    2290  C    .  PHE  A  311  ?  -19.81331  -33.96188   33.34068  1.000   10.74185  C   ?  A  ?   288  1
  ATOM    2291  O    .  PHE  A  311  ?  -20.99331  -33.63192   33.46970  1.000    9.74027  O   ?  A  ?   288  1
  ATOM    2292  CB   .  PHE  A  311  ?  -19.46574  -36.11824   34.52550  1.000    8.87588  C   ?  A  ?   288  1
  ATOM    2293  CG   .  PHE  A  311  ?  -19.35332  -37.61171   34.45773  1.000    7.75851  C   ?  A  ?   288  1
  ATOM    2294  CD1  .  PHE  A  311  ?  -20.47389  -38.39471   34.23893  1.000   12.32456  C   ?  A  ?   288  1
  ATOM    2295  CD2  .  PHE  A  311  ?  -18.12726  -38.23319   34.61354  1.000   10.20362  C   ?  A  ?   288  1
  ATOM    2296  CE1  .  PHE  A  311  ?  -20.37410  -39.77274   34.17489  1.000   13.31118  C   ?  A  ?   288  1
  ATOM    2297  CE2  .  PHE  A  311  ?  -18.01944  -39.61167   34.55075  1.000   11.53144  C   ?  A  ?   288  1
  ATOM    2298  CZ   .  PHE  A  311  ?  -19.14532  -40.38117   34.33188  1.000   12.41649  C   ?  A  ?   288  1
  ATOM    2299  N    .  GLY  A  312  ?  -18.82325  -33.07375   33.36848  1.000   11.38988  N   ?  A  ?   289  1
  ATOM    2300  CA   .  GLY  A  312  ?  -19.07789  -31.66080   33.53020  1.000    9.12601  C   ?  A  ?   289  1
  ATOM    2301  C    .  GLY  A  312  ?  -19.04255  -31.22452   34.98163  1.000    6.53200  C   ?  A  ?   289  1
  ATOM    2302  O    .  GLY  A  312  ?  -19.20446  -32.03322   35.89896  1.000    6.80828  O   ?  A  ?   289  1
  ATOM    2303  N    .  PRO  A  313  ?  -18.84813  -29.92213   35.21673  1.000    6.18617  N   ?  A  ?   290  1
  ATOM    2304  CA   .  PRO  A  313  ?  -18.62361  -29.44932   36.59485  1.000    7.35035  C   ?  A  ?   290  1
  ATOM    2305  C    .  PRO  A  313  ?  -19.82170  -29.59265   37.52038  1.000    6.19172  C   ?  A  ?   290  1
  ATOM    2306  O    .  PRO  A  313  ?  -19.64352  -29.49686   38.74131  1.000    4.89304  O   ?  A  ?   290  1
  ATOM    2307  CB   .  PRO  A  313  ?  -18.24813  -27.97243   36.40317  1.000   12.19555  C   ?  A  ?   290  1
  ATOM    2308  CG   .  PRO  A  313  ?  -18.82939  -27.59848   35.08523  1.000   14.80366  C   ?  A  ?   290  1
  ATOM    2309  CD   .  PRO  A  313  ?  -18.73838  -28.83143   34.23252  1.000    3.16026  C   ?  A  ?   290  1
  ATOM    2310  N    .  ASN  A  314  ?  -21.02595  -29.81560   36.99973  1.000    5.88434  N   ?  A  ?   291  1
  ATOM    2311  CA   .  ASN  A  314  ?  -22.21951  -29.88953   37.83139  1.000   10.87146  C   ?  A  ?   291  1
  ATOM    2312  C    .  ASN  A  314  ?  -22.67649  -31.32002   38.08208  1.000   11.45699  C   ?  A  ?   291  1
  ATOM    2313  O    .  ASN  A  314  ?  -23.76551  -31.52807   38.62449  1.000   13.56790  O   ?  A  ?   291  1
  ATOM    2314  CB   .  ASN  A  314  ?  -23.34839  -29.07640   37.19884  1.000   14.63120  C   ?  A  ?   291  1
  ATOM    2315  CG   .  ASN  A  314  ?  -22.96808  -27.62318   36.99235  1.000   16.70381  C   ?  A  ?   291  1
  ATOM    2316  ND2  .  ASN  A  314  ?  -23.16755  -26.80663   38.02103  1.000   15.35719  N   ?  A  ?   291  1
  ATOM    2317  OD1  .  ASN  A  314  ?  -22.48898  -27.24099   35.92465  1.000   17.11917  O   ?  A  ?   291  1
  ATOM    2318  N    .  SER  A  315  ?  -21.86643  -32.30429   37.71577  1.000    7.27298  N   ?  A  ?   292  1
  ATOM    2319  CA   .  SER  A  315  ?  -22.23632  -33.69944   37.88240  1.000    6.83145  C   ?  A  ?   292  1
  ATOM    2320  C    .  SER  A  315  ?  -21.98211  -34.16530   39.30911  1.000    7.52264  C   ?  A  ?   292  1
  ATOM    2321  O    .  SER  A  315  ?  -21.11807  -33.63618   40.01437  1.000    5.73904  O   ?  A  ?   292  1
  ATOM    2322  CB   .  SER  A  315  ?  -21.44311  -34.57287   36.91471  1.000    6.72815  C   ?  A  ?   292  1
  ATOM    2323  OG   .  SER  A  315  ?  -20.04990  -34.41087   37.11966  1.000    7.69739  O   ?  A  ?   292  1
  ATOM    2324  N    .  ILE  A  316  ?  -22.74510  -35.17670   39.73144  1.000    6.97343  N   ?  A  ?   293  1
  ATOM    2325  CA   .  ILE  A  316  ?  -22.43492  -35.83945   40.99500  1.000    7.71870  C   ?  A  ?   293  1
  ATOM    2326  C    .  ILE  A  316  ?  -21.04947  -36.46468   40.92695  1.000    7.35157  C   ?  A  ?   293  1
  ATOM    2327  O    .  ILE  A  316  ?  -20.30712  -36.48107   41.91662  1.000    3.51502  O   ?  A  ?   293  1
  ATOM    2328  CB   .  ILE  A  316  ?  -23.50911  -36.88713   41.33808  1.000    6.24206  C   ?  A  ?   293  1
  ATOM    2329  CG1  .  ILE  A  316  ?  -24.88527  -36.22949   41.44154  1.000    9.33603  C   ?  A  ?   293  1
  ATOM    2330  CG2  .  ILE  A  316  ?  -23.15919  -37.60157   42.64142  1.000    8.85542  C   ?  A  ?   293  1
  ATOM    2331  CD1  .  ILE  A  316  ?  -26.00797  -37.21136   41.67908  1.000   12.41043  C   ?  A  ?   293  1
  ATOM    2332  N    .  GLU  A  317  ?  -20.67733  -36.97303   39.74970  1.000    8.04832  N   ?  A  ?   294  1
  ATOM    2333  CA   .  GLU  A  317  ?  -19.37159  -37.59735   39.56958  1.000    8.19168  C   ?  A  ?   294  1
  ATOM    2334  C    .  GLU  A  317  ?  -18.24594  -36.64329   39.94295  1.000    9.57237  C   ?  A  ?   294  1
  ATOM    2335  O    .  GLU  A  317  ?  -17.33437  -37.00664   40.69404  1.000    7.49595  O   ?  A  ?   294  1
  ATOM    2336  CB   .  GLU  A  317  ?  -19.21820  -38.06549   38.12289  1.000    8.46208  C   ?  A  ?   294  1
  ATOM    2337  CG   .  GLU  A  317  ?  -19.99687  -39.32704   37.77917  1.000    8.14631  C   ?  A  ?   294  1
  ATOM    2338  CD   .  GLU  A  317  ?  -21.48284  -39.08790   37.54161  1.000    8.17130  C   ?  A  ?   294  1
  ATOM    2339  OE1  .  GLU  A  317  ?  -21.95764  -37.94501   37.71197  1.000    5.68145  O   ?  A  ?   294  1
  ATOM    2340  OE2  .  GLU  A  317  ?  -22.17682  -40.05812   37.17457  1.000    9.85523  O   ?  A  ?   294  1
  ATOM    2341  N    .  VAL  A  318  ?  -18.29623  -35.41194   39.42824  1.000    5.73149  N   ?  A  ?   295  1
  ATOM    2342  CA   .  VAL  A  318  ?  -17.24264  -34.44332   39.71632  1.000    4.52040  C   ?  A  ?   295  1
  ATOM    2343  C    .  VAL  A  318  ?  -17.23388  -34.07801   41.19556  1.000    5.26867  C   ?  A  ?   295  1
  ATOM    2344  O    .  VAL  A  318  ?  -16.16852  -33.99278   41.81845  1.000    7.04777  O   ?  A  ?   295  1
  ATOM    2345  CB   .  VAL  A  318  ?  -17.39967  -33.20172   38.82157  1.000    5.89958  C   ?  A  ?   295  1
  ATOM    2346  CG1  .  VAL  A  318  ?  -16.60414  -32.02987   39.38303  1.000    7.40220  C   ?  A  ?   295  1
  ATOM    2347  CG2  .  VAL  A  318  ?  -16.94231  -33.52531   37.41584  1.000    3.66534  C   ?  A  ?   295  1
  ATOM    2348  N    .  GLU  A  319  ?  -18.41241  -33.86937   41.78765  1.000    4.24665  N   ?  A  ?   296  1
  ATOM    2349  CA   .  GLU  A  319  ?  -18.45579  -33.53146   43.20736  1.000    6.18848  C   ?  A  ?   296  1
  ATOM    2350  C    .  GLU  A  319  ?  -17.85106  -34.63898   44.05909  1.000    7.27308  C   ?  A  ?   296  1
  ATOM    2351  O    .  GLU  A  319  ?  -17.09777  -34.36400   45.00046  1.000    8.67488  O   ?  A  ?   296  1
  ATOM    2352  CB   .  GLU  A  319  ?  -19.88602  -33.24369   43.66182  1.000    7.22171  C   ?  A  ?   296  1
  ATOM    2353  CG   .  GLU  A  319  ?  -19.96486  -32.97984   45.16528  1.000    7.96024  C   ?  A  ?   296  1
  ATOM    2354  CD   .  GLU  A  319  ?  -21.29787  -32.41241   45.61233  1.000   10.52200  C   ?  A  ?   296  1
  ATOM    2355  OE1  .  GLU  A  319  ?  -22.22156  -32.32207   44.77939  1.000   10.57817  O   ?  A  ?   296  1
  ATOM    2356  OE2  .  GLU  A  319  ?  -21.41644  -32.05504   46.80340  1.000    9.58046  O   ?  A  ?   296  1
  ATOM    2357  N    .  ASP  A  320  ?  -18.16780  -35.89904   43.74797  1.000    8.74175  N   ?  A  ?   297  1
  ATOM    2358  CA   .  ASP  A  320  ?  -17.58378  -36.99965   44.50720  1.000    6.55305  C   ?  A  ?   297  1
  ATOM    2359  C    .  ASP  A  320  ?  -16.07850  -37.08247   44.29865  1.000    8.30611  C   ?  A  ?   297  1
  ATOM    2360  O    .  ASP  A  320  ?  -15.34510  -37.45429   45.22125  1.000    5.40324  O   ?  A  ?   297  1
  ATOM    2361  CB   .  ASP  A  320  ?  -18.23978  -38.32490   44.12270  1.000    5.70188  C   ?  A  ?   297  1
  ATOM    2362  CG   .  ASP  A  320  ?  -17.95029  -39.42553   45.12474  1.000    7.04891  C   ?  A  ?   297  1
  ATOM    2363  OD1  .  ASP  A  320  ?  -17.40807  -40.47600   44.72288  1.000    6.76724  O   ?  A  ?   297  1
  ATOM    2364  OD2  .  ASP  A  320  ?  -18.27028  -39.23674   46.31664  1.000    9.62392  O   ?  A  ?   297  1
  ATOM    2365  N    .  THR  A  321  ?  -15.60087  -36.74199   43.09891  1.000    5.94237  N   ?  A  ?   298  1
  ATOM    2366  CA   .  THR  A  321  ?  -14.16422  -36.75245   42.84547  1.000    7.85572  C   ?  A  ?   298  1
  ATOM    2367  C    .  THR  A  321  ?  -13.44253  -35.75222   43.73944  1.000    7.22267  C   ?  A  ?   298  1
  ATOM    2368  O    .  THR  A  321  ?  -12.34877  -36.03312   44.24147  1.000    7.04244  O   ?  A  ?   298  1
  ATOM    2369  CB   .  THR  A  321  ?  -13.89091  -36.45780   41.36926  1.000    7.93159  C   ?  A  ?   298  1
  ATOM    2370  OG1  .  THR  A  321  ?  -14.48575  -37.48159   40.56237  1.000   12.12698  O   ?  A  ?   298  1
  ATOM    2371  CG2  .  THR  A  321  ?  -12.39536  -36.41373   41.09166  1.000   11.19411  C   ?  A  ?   298  1
  ATOM    2372  N    .  TYR  A  322  ?  -14.04652  -34.58447   43.96606  1.000    5.60353  N   ?  A  ?   299  1
  ATOM    2373  CA   .  TYR  A  322  ?  -13.40529  -33.58322   44.80985  1.000    5.68777  C   ?  A  ?   299  1
  ATOM    2374  C    .  TYR  A  322  ?  -13.53853  -33.90386   46.29059  1.000    5.42437  C   ?  A  ?   299  1
  ATOM    2375  O    .  TYR  A  322  ?  -12.63626  -33.57722   47.06952  1.000    6.00953  O   ?  A  ?   299  1
  ATOM    2376  CB   .  TYR  A  322  ?  -13.96700  -32.19581   44.50031  1.000    8.25699  C   ?  A  ?   299  1
  ATOM    2377  CG   .  TYR  A  322  ?  -13.30308  -31.60040   43.28799  1.000    8.80428  C   ?  A  ?   299  1
  ATOM    2378  CD1  .  TYR  A  322  ?  -12.07158  -30.97105   43.39483  1.000   11.19532  C   ?  A  ?   299  1
  ATOM    2379  CD2  .  TYR  A  322  ?  -13.88084  -31.70531   42.03126  1.000    7.83027  C   ?  A  ?   299  1
  ATOM    2380  CE1  .  TYR  A  322  ?  -11.44316  -30.44147   42.29000  1.000   10.78509  C   ?  A  ?   299  1
  ATOM    2381  CE2  .  TYR  A  322  ?  -13.25920  -31.17576   40.91654  1.000    8.74897  C   ?  A  ?   299  1
  ATOM    2382  CZ   .  TYR  A  322  ?  -12.04056  -30.54573   41.05392  1.000    8.19370  C   ?  A  ?   299  1
  ATOM    2383  OH   .  TYR  A  322  ?  -11.40933  -30.01497   39.95256  1.000    5.37547  O   ?  A  ?   299  1
  ATOM    2384  N    .  LEU  A  323  ?  -14.63652  -34.54018   46.70104  1.000    4.81049  N   ?  A  ?   300  1
  ATOM    2385  CA   .  LEU  A  323  ?  -14.72906  -34.98534   48.08720  1.000    8.05209  C   ?  A  ?   300  1
  ATOM    2386  C    .  LEU  A  323  ?  -13.71341  -36.08521   48.37142  1.000    6.98256  C   ?  A  ?   300  1
  ATOM    2387  O    .  LEU  A  323  ?  -13.13395  -36.13827   49.46255  1.000    6.03087  O   ?  A  ?   300  1
  ATOM    2388  CB   .  LEU  A  323  ?  -16.14597  -35.46445   48.40185  1.000    6.29344  C   ?  A  ?   300  1
  ATOM    2389  CG   .  LEU  A  323  ?  -17.30413  -34.48641   48.17739  1.000   10.18281  C   ?  A  ?   300  1
  ATOM    2390  CD1  .  LEU  A  323  ?  -17.02980  -33.12915   48.80400  1.000    9.04140  C   ?  A  ?   300  1
  ATOM    2391  CD2  .  LEU  A  323  ?  -18.59418  -35.07428   48.72616  1.000   14.56418  C   ?  A  ?   300  1
  ATOM    2392  N    .  ARG  A  324  ?  -13.47459  -36.96483   47.39602  1.000    7.44286  N   ?  A  ?   301  1
  ATOM    2393  CA   .  ARG  A  324  ?  -12.48705  -38.02265   47.57769  1.000    5.90350  C   ?  A  ?   301  1
  ATOM    2394  C    .  ARG  A  324  ?  -11.06469  -37.48932   47.44082  1.000    9.21171  C   ?  A  ?   301  1
  ATOM    2395  O    .  ARG  A  324  ?  -10.16509  -37.92847   48.16525  1.000   10.58997  O   ?  A  ?   301  1
  ATOM    2396  CB   .  ARG  A  324  ?  -12.74132  -39.15676   46.58298  1.000    3.70374  C   ?  A  ?   301  1
  ATOM    2397  CG   .  ARG  A  324  ?  -14.04346  -39.91278   46.83189  1.000    3.72638  C   ?  A  ?   301  1
  ATOM    2398  CD   .  ARG  A  324  ?  -14.18880  -41.09430   45.88695  1.000    6.07717  C   ?  A  ?   301  1
  ATOM    2399  NE   .  ARG  A  324  ?  -15.37680  -41.90069   46.15705  1.000    7.81888  N   ?  A  ?   301  1
  ATOM    2400  CZ   .  ARG  A  324  ?  -15.41968  -42.89474   47.03964  1.000   11.19165  C   ?  A  ?   301  1
  ATOM    2401  NH1  .  ARG  A  324  ?  -16.54008  -43.58107   47.21607  1.000   11.80673  N   ?  A  ?   301  1
  ATOM    2402  NH2  .  ARG  A  324  ?  -14.34352  -43.19904   47.75262  1.000   13.70663  N   ?  A  ?   301  1
  ATOM    2403  N    .  LEU  A  325  ?  -10.83995  -36.54444   46.52309  1.000    9.38355  N   ?  A  ?   302  1
  ATOM    2404  CA   .  LEU  A  325  ?   -9.52913  -35.90800   46.43747  1.000    7.75264  C   ?  A  ?   302  1
  ATOM    2405  C    .  LEU  A  325  ?   -9.20999  -35.14566   47.71716  1.000    7.30169  C   ?  A  ?   302  1
  ATOM    2406  O    .  LEU  A  325  ?   -8.07455  -35.18723   48.20491  1.000    7.17135  O   ?  A  ?   302  1
  ATOM    2407  CB   .  LEU  A  325  ?   -9.46643  -34.97317   45.22893  1.000    8.72480  C   ?  A  ?   302  1
  ATOM    2408  CG   .  LEU  A  325  ?   -8.21379  -34.09853   45.13748  1.000    9.98833  C   ?  A  ?   302  1
  ATOM    2409  CD1  .  LEU  A  325  ?   -6.96682  -34.95637   45.01737  1.000    8.24545  C   ?  A  ?   302  1
  ATOM    2410  CD2  .  LEU  A  325  ?   -8.31474  -33.12381   43.97122  1.000    9.72946  C   ?  A  ?   302  1
  ATOM    2411  N    .  ASP  A  326  ?  -10.20600  -34.45090   48.27899  1.000    8.47237  N   ?  A  ?   303  1
  ATOM    2412  CA   .  ASP  A  326  ?  -10.00485  -33.72760   49.53254  1.000   10.12400  C   ?  A  ?   303  1
  ATOM    2413  C    .  ASP  A  326  ?   -9.48465  -34.64665   50.62903  1.000    8.87401  C   ?  A  ?   303  1
  ATOM    2414  O    .  ASP  A  326  ?   -8.56866  -34.28146   51.37483  1.000    7.39277  O   ?  A  ?   303  1
  ATOM    2415  CB   .  ASP  A  326  ?  -11.31091  -33.06907   49.97575  1.000   11.47691  C   ?  A  ?   303  1
  ATOM    2416  CG   .  ASP  A  326  ?  -11.19569  -32.40579   51.33006  1.000   10.20014  C   ?  A  ?   303  1
  ATOM    2417  OD1  .  ASP  A  326  ?  -10.59832  -31.31688   51.40376  1.000   11.36499  O   ?  A  ?   303  1
  ATOM    2418  OD2  .  ASP  A  326  ?  -11.70677  -32.96647   52.32071  1.000   13.04867  O   ?  A  ?   303  1
  ATOM    2419  N    .  ARG  A  327  ?  -10.05768  -35.84426   50.74550  1.000   10.93763  N   ?  A  ?   304  1
  ATOM    2420  CA   .  ARG  A  327  ?   -9.59656  -36.77475   51.76865  1.000    7.79129  C   ?  A  ?   304  1
  ATOM    2421  C    .  ARG  A  327  ?   -8.19181  -37.27585   51.46216  1.000    9.76769  C   ?  A  ?   304  1
  ATOM    2422  O    .  ARG  A  327  ?   -7.36510  -37.41676   52.37060  1.000   10.24624  O   ?  A  ?   304  1
  ATOM    2423  CB   .  ARG  A  327  ?  -10.57143  -37.94382   51.89470  1.000   10.81295  C   ?  A  ?   304  1
  ATOM    2424  CG   .  ARG  A  327  ?  -10.12746  -38.99482   52.88917  1.000   17.28049  C   ?  A  ?   304  1
  ATOM    2425  CD   .  ARG  A  327  ?  -11.18192  -40.06612   53.07201  1.000   24.39979  C   ?  A  ?   304  1
  ATOM    2426  NE   .  ARG  A  327  ?  -11.39324  -40.85207   51.86136  1.000   29.03516  N   ?  A  ?   304  1
  ATOM    2427  CZ   .  ARG  A  327  ?  -12.16946  -41.92808   51.80771  1.000   35.18987  C   ?  A  ?   304  1
  ATOM    2428  NH1  .  ARG  A  327  ?  -12.31193  -42.59342   50.66927  1.000   35.01277  N   ?  A  ?   304  1
  ATOM    2429  NH2  .  ARG  A  327  ?  -12.80205  -42.33870   52.89913  1.000   37.07828  N   ?  A  ?   304  1
  ATOM    2430  N    .  ASP  A  328  ?   -7.90131  -37.53991   50.18597  1.000   10.37869  N   ?  A  ?   305  1
  ATOM    2431  CA   .  ASP  A  328  ?   -6.57003  -38.00353   49.80812  1.000   11.95678  C   ?  A  ?   305  1
  ATOM    2432  C    .  ASP  A  328  ?   -5.51342  -36.94140   50.08623  1.000   11.62017  C   ?  A  ?   305  1
  ATOM    2433  O    .  ASP  A  328  ?   -4.39380  -37.26267   50.50206  1.000   11.58206  O   ?  A  ?   305  1
  ATOM    2434  CB   .  ASP  A  328  ?   -6.55077  -38.40202   48.33264  1.000   12.20807  C   ?  A  ?   305  1
  ATOM    2435  CG   .  ASP  A  328  ?   -7.24150  -39.72471   48.07267  1.000   15.23812  C   ?  A  ?   305  1
  ATOM    2436  OD1  .  ASP  A  328  ?   -7.36686  -40.53450   49.01590  1.000   18.86265  O   ?  A  ?   305  1
  ATOM    2437  OD2  .  ASP  A  328  ?   -7.64614  -39.96076   46.91548  1.000   17.29139  O   ?  A  ?   305  1
  ATOM    2438  N    .  LEU  A  329  ?   -5.84684  -35.66914   49.85643  1.000   10.33916  N   ?  A  ?   306  1
  ATOM    2439  CA   .  LEU  A  329  ?   -4.91039  -34.59822   50.17820  1.000    6.54212  C   ?  A  ?   306  1
  ATOM    2440  C    .  LEU  A  329  ?   -4.65648  -34.52519   51.67621  1.000    5.00691  C   ?  A  ?   306  1
  ATOM    2441  O    .  LEU  A  329  ?   -3.52509  -34.28366   52.11058  1.000    4.15329  O   ?  A  ?   306  1
  ATOM    2442  CB   .  LEU  A  329  ?   -5.43892  -33.26513   49.66066  1.000    6.38950  C   ?  A  ?   306  1
  ATOM    2443  CG   .  LEU  A  329  ?   -5.39305  -33.08467   48.14546  1.000   10.02615  C   ?  A  ?   306  1
  ATOM    2444  CD1  .  LEU  A  329  ?   -6.12197  -31.80835   47.76420  1.000    8.98018  C   ?  A  ?   306  1
  ATOM    2445  CD2  .  LEU  A  329  ?   -3.95404  -33.05657   47.64284  1.000    8.74198  C   ?  A  ?   306  1
  ATOM    2446  N    .  ALA  A  330  ?   -5.69955  -34.72860   52.48200  1.000    8.50027  N   ?  A  ?   307  1
  ATOM    2447  CA   .  ALA  A  330  ?   -5.51346  -34.77279   53.92742  1.000   10.08331  C   ?  A  ?   307  1
  ATOM    2448  C    .  ALA  A  330  ?   -4.54922  -35.88473   54.32077  1.000    8.87594  C   ?  A  ?   307  1
  ATOM    2449  O    .  ALA  A  330  ?   -3.66282  -35.67976   55.15819  1.000   10.45401  O   ?  A  ?   307  1
  ATOM    2450  CB   .  ALA  A  330  ?   -6.86213  -34.95060   54.62543  1.000    9.77828  C   ?  A  ?   307  1
  ATOM    2451  N    .  ASP  A  331  ?   -4.70248  -37.06938   53.72194  1.000    9.91301  N   ?  A  ?   308  1
  ATOM    2452  CA   .  ASP  A  331  ?   -3.75152  -38.14909   53.96887  1.000   12.52318  C   ?  A  ?   308  1
  ATOM    2453  C    .  ASP  A  331  ?   -2.36171  -37.77205   53.47750  1.000    9.75706  C   ?  A  ?   308  1
  ATOM    2454  O    .  ASP  A  331  ?   -1.35675  -38.08525   54.12577  1.000    9.97502  O   ?  A  ?   308  1
  ATOM    2455  CB   .  ASP  A  331  ?   -4.21345  -39.43693   53.28494  1.000   12.98504  C   ?  A  ?   308  1
  ATOM    2456  CG   .  ASP  A  331  ?   -5.51685  -39.96900   53.84544  1.000   19.40551  C   ?  A  ?   308  1
  ATOM    2457  OD1  .  ASP  A  331  ?   -5.87797  -39.60176   54.98272  1.000   19.11771  O   ?  A  ?   308  1
  ATOM    2458  OD2  .  ASP  A  331  ?   -6.17499  -40.76859   53.14658  1.000   21.60484  O   ?  A  ?   308  1
  ATOM    2459  N    .  PHE  A  332  ?   -2.28925  -37.09849   52.32889  1.000    5.95417  N   ?  A  ?   309  1
  ATOM    2460  CA   .  PHE  A  332  ?   -1.00134  -36.71977   51.76129  1.000    9.86671  C   ?  A  ?   309  1
  ATOM    2461  C    .  PHE  A  332  ?   -0.27029  -35.73611   52.66794  1.000   12.45413  C   ?  A  ?   309  1
  ATOM    2462  O    .  PHE  A  332  ?    0.92003  -35.90812   52.95815  1.000   11.95009  O   ?  A  ?   309  1
  ATOM    2463  CB   .  PHE  A  332  ?   -1.21139  -36.13017   50.36681  1.000    9.51747  C   ?  A  ?   309  1
  ATOM    2464  CG   .  PHE  A  332  ?    0.05733  -35.74442   49.67558  1.000   12.52091  C   ?  A  ?   309  1
  ATOM    2465  CD1  .  PHE  A  332  ?    0.85269  -36.70421   49.07241  1.000   11.92970  C   ?  A  ?   309  1
  ATOM    2466  CD2  .  PHE  A  332  ?    0.45301  -34.41880   49.62192  1.000   11.41470  C   ?  A  ?   309  1
  ATOM    2467  CE1  .  PHE  A  332  ?    2.02402  -36.34757   48.42979  1.000   11.96085  C   ?  A  ?   309  1
  ATOM    2468  CE2  .  PHE  A  332  ?    1.62133  -34.05709   48.98236  1.000   13.34587  C   ?  A  ?   309  1
  ATOM    2469  CZ   .  PHE  A  332  ?    2.40829  -35.02342   48.38496  1.000   11.74516  C   ?  A  ?   309  1
  ATOM    2470  N    .  PHE  A  333  ?   -0.97534  -34.70055   53.13489  1.000   12.20910  N   ?  A  ?   310  1
  ATOM    2471  CA   .  PHE  A  333  ?   -0.36116  -33.72368   54.02926  1.000   10.84748  C   ?  A  ?   310  1
  ATOM    2472  C    .  PHE  A  333  ?    0.02091  -34.35662   55.36300  1.000   12.33378  C   ?  A  ?   310  1
  ATOM    2473  O    .  PHE  A  333  ?    1.05127  -34.00563   55.94940  1.000   10.31473  O   ?  A  ?   310  1
  ATOM    2474  CB   .  PHE  A  333  ?   -1.30596  -32.54145   54.25001  1.000    6.40653  C   ?  A  ?   310  1
  ATOM    2475  CG   .  PHE  A  333  ?   -1.58064  -31.73272   53.00847  1.000    4.72675  C   ?  A  ?   310  1
  ATOM    2476  CD1  .  PHE  A  333  ?   -0.66787  -31.69189   51.96608  1.000    8.23823  C   ?  A  ?   310  1
  ATOM    2477  CD2  .  PHE  A  333  ?   -2.75562  -31.00745   52.88973  1.000    6.43739  C   ?  A  ?   310  1
  ATOM    2478  CE1  .  PHE  A  333  ?   -0.92430  -30.94239   50.82584  1.000    9.08225  C   ?  A  ?   310  1
  ATOM    2479  CE2  .  PHE  A  333  ?   -3.01726  -30.25423   51.75565  1.000    3.82149  C   ?  A  ?   310  1
  ATOM    2480  CZ   .  PHE  A  333  ?   -2.09987  -30.22437   50.72267  1.000    6.54419  C   ?  A  ?   310  1
  ATOM    2481  N    .  ASN  A  334  ?   -0.79466  -35.29057   55.86043  1.000   14.23386  N   ?  A  ?   311  1
  ATOM    2482  CA   .  ASN  A  334  ?   -0.45131  -35.96863   57.10714  1.000   15.70683  C   ?  A  ?   311  1
  ATOM    2483  C    .  ASN  A  334  ?    0.80016  -36.82245   56.94203  1.000   14.79943  C   ?  A  ?   311  1
  ATOM    2484  O    .  ASN  A  334  ?    1.61577  -36.92063   57.86547  1.000   14.86964  O   ?  A  ?   311  1
  ATOM    2485  CB   .  ASN  A  334  ?   -1.62778  -36.81677   57.59396  1.000   15.27843  C   ?  A  ?   311  1
  ATOM    2486  CG   .  ASN  A  334  ?   -2.77534  -35.97388   58.13075  1.000   19.34683  C   ?  A  ?   311  1
  ATOM    2487  ND2  .  ASN  A  334  ?   -3.98264  -36.52634   58.09625  1.000   18.99283  N   ?  A  ?   311  1
  ATOM    2488  OD1  .  ASN  A  334  ?   -2.57629  -34.84338   58.57577  1.000   22.75393  O   ?  A  ?   311  1
  ATOM    2489  N    .  ASN  A  335  ?    0.97452  -37.44197   55.77142  1.000   15.19545  N   ?  A  ?   312  1
  ATOM    2490  CA   .  ASN  A  335  ?    2.20549  -38.18269   55.51074  1.000   16.06401  C   ?  A  ?   312  1
  ATOM    2491  C    .  ASN  A  335  ?    3.40494  -37.24583   55.44413  1.000   15.22304  C   ?  A  ?   312  1
  ATOM    2492  O    .  ASN  A  335  ?    4.49969  -37.59715   55.89963  1.000   13.11748  O   ?  A  ?   312  1
  ATOM    2493  CB   .  ASN  A  335  ?    2.07958  -38.98686   54.21601  1.000   13.14237  C   ?  A  ?   312  1
  ATOM    2494  CG   .  ASN  A  335  ?    3.32134  -39.81069   53.91832  1.000   14.60417  C   ?  A  ?   312  1
  ATOM    2495  OD1  .  ASN  A  335  ?    3.61051  -40.78707   54.60868  1.000   17.86570  O   ?  A  ?   312  1
  ATOM    2496  ND2  .  ASN  A  335  ?    4.05794  -39.42313   52.88355  1.000   10.05721  N   ?  A  ?   312  1
  ATOM    2497  N    .  LEU  A  336  ?    3.21826  -36.05007   54.87819  1.000   16.51662  N   ?  A  ?   313  1
  ATOM    2498  CA   .  LEU  A  336  ?    4.29148  -35.06224   54.87068  1.000   11.70959  C   ?  A  ?   313  1
  ATOM    2499  C    .  LEU  A  336  ?    4.68469  -34.67107   56.28803  1.000    9.78513  C   ?  A  ?   313  1
  ATOM    2500  O    .  LEU  A  336  ?    5.87486  -34.53020   56.59332  1.000   13.53436  O   ?  A  ?   313  1
  ATOM    2501  CB   .  LEU  A  336  ?    3.86881  -33.82730   54.07616  1.000   11.41076  C   ?  A  ?   313  1
  ATOM    2502  CG   .  LEU  A  336  ?    3.68361  -34.03050   52.57536  1.000    9.38831  C   ?  A  ?   313  1
  ATOM    2503  CD1  .  LEU  A  336  ?    3.29400  -32.72697   51.89284  1.000   12.66725  C   ?  A  ?   313  1
  ATOM    2504  CD2  .  LEU  A  336  ?    4.95268  -34.59010   51.97553  1.000    9.08416  C   ?  A  ?   313  1
  ATOM    2505  N    .  ASP  A  337  ?    3.69668  -34.49892   57.17080  1.000   12.14423  N   ?  A  ?   314  1
  ATOM    2506  CA   .  ASP  A  337  ?    3.99439  -34.12470   58.54940  1.000   16.46323  C   ?  A  ?   314  1
  ATOM    2507  C    .  ASP  A  337  ?    4.87469  -35.15808   59.23847  1.000   20.05808  C   ?  A  ?   314  1
  ATOM    2508  O    .  ASP  A  337  ?    5.68235  -34.80261   60.10348  1.000   20.00184  O   ?  A  ?   314  1
  ATOM    2509  CB   .  ASP  A  337  ?    2.70126  -33.93249   59.34500  1.000   18.01988  C   ?  A  ?   314  1
  ATOM    2510  CG   .  ASP  A  337  ?    1.89335  -32.74283   58.87328  1.000   19.18108  C   ?  A  ?   314  1
  ATOM    2511  OD1  .  ASP  A  337  ?    2.45454  -31.87760   58.16615  1.000   20.08032  O   ?  A  ?   314  1
  ATOM    2512  OD2  .  ASP  A  337  ?    0.69357  -32.66979   59.21692  1.000   18.29536  O   ?  A  ?   314  1
  ATOM    2513  N    .  LYS  A  338  ?    4.73894  -36.43350   58.87494  1.000   25.08075  N   ?  A  ?   315  1
  ATOM    2514  CA   .  LYS  A  338  ?    5.49834  -37.48686   59.53669  1.000   30.30521  C   ?  A  ?   315  1
  ATOM    2515  C    .  LYS  A  338  ?    6.83672  -37.75616   58.85985  1.000   28.33644  C   ?  A  ?   315  1
  ATOM    2516  O    .  LYS  A  338  ?    7.82251  -38.05476   59.54169  1.000   29.79831  O   ?  A  ?   315  1
  ATOM    2517  CB   .  LYS  A  338  ?    4.67672  -38.77803   59.58499  1.000   36.55264  C   ?  A  ?   315  1
  ATOM    2518  CG   .  LYS  A  338  ?    3.32307  -38.64390   60.26764  1.000   46.23501  C   ?  A  ?   315  1
  ATOM    2519  CD   .  LYS  A  338  ?    3.44860  -38.34444   61.75895  1.000   54.04927  C   ?  A  ?   315  1
  ATOM    2520  CE   .  LYS  A  338  ?    2.08434  -38.41794   62.44707  1.000   58.90735  C   ?  A  ?   315  1
  ATOM    2521  NZ   .  LYS  A  338  ?    2.10549  -37.93082   63.85721  1.000   60.99202  N   ?  A  ?   315  1
  ATOM    2522  O    .  LYS  A  339  ?   10.25626  -36.96444   56.49169  1.000   24.64942  O   ?  A  ?   316  1
  ATOM    2523  N    .  LYS  A  339  ?    6.89365  -37.65170   57.53190  1.000   22.05664  N   ?  A  ?   316  1
  ATOM    2524  CA   .  LYS  A  339  ?    8.10768  -37.96374   56.78734  1.000   22.27858  C   ?  A  ?   316  1
  ATOM    2525  C    .  LYS  A  339  ?    9.04378  -36.77393   56.64485  1.000   24.05510  C   ?  A  ?   316  1
  ATOM    2526  CB   .  LYS  A  339  ?    7.74904  -38.48717   55.39479  1.000   22.91875  C   ?  A  ?   316  1
  ATOM    2527  CG   .  LYS  A  339  ?    6.89100  -39.73589   55.40772  1.000   24.25165  C   ?  A  ?   316  1
  ATOM    2528  CD   .  LYS  A  339  ?    7.63259  -40.90292   56.03471  1.000   25.88049  C   ?  A  ?   316  1
  ATOM    2529  CE   .  LYS  A  339  ?    6.72733  -42.11371   56.19315  1.000   27.29901  C   ?  A  ?   316  1
  ATOM    2530  NZ   .  LYS  A  339  ?    6.25857  -42.63662   54.88013  1.000   30.43237  N   ?  A  ?   316  1
  ATOM    2531  O    .  VAL  A  340  ?   10.23371  -32.93077   58.22820  1.000   22.66258  O   ?  A  ?   317  1
  ATOM    2532  N    .  VAL  A  340  ?    8.50949  -35.55277   56.67702  1.000   21.43861  N   ?  A  ?   317  1
  ATOM    2533  CA   .  VAL  A  340  ?    9.30116  -34.34223   56.52871  1.000   19.39131  C   ?  A  ?   317  1
  ATOM    2534  C    .  VAL  A  340  ?    9.21620  -33.45752   57.76441  1.000   20.48109  C   ?  A  ?   317  1
  ATOM    2535  CB   .  VAL  A  340  ?    8.87781  -33.55567   55.26836  1.000   18.60882  C   ?  A  ?   317  1
  ATOM    2536  CG1  .  VAL  A  340  ?    9.68999  -32.27809   55.13529  1.000   18.49541  C   ?  A  ?   317  1
  ATOM    2537  CG2  .  VAL  A  340  ?    9.03513  -34.42210   54.02790  1.000   16.56598  C   ?  A  ?   317  1
  ATOM    2538  O    .  GLY  A  341  ?    7.35073  -30.55065   58.10916  1.000   21.74319  O   ?  A  ?   318  1
  ATOM    2539  N    .  GLY  A  341  ?    8.02775  -33.29269   58.31746  1.000   20.28166  N   ?  A  ?   318  1
  ATOM    2540  CA   .  GLY  A  341  ?    7.82460  -32.46164   59.49099  1.000   20.36395  C   ?  A  ?   318  1
  ATOM    2541  C    .  GLY  A  341  ?    7.06788  -31.19828   59.12524  1.000   23.02145  C   ?  A  ?   318  1
  ATOM    2542  O    .  LYS  A  342  ?    6.86484  -28.28304   60.95435  1.000   20.11069  O   ?  A  ?   319  1
  ATOM    2543  N    .  LYS  A  342  ?    6.09042  -30.84482   59.95708  1.000   26.10023  N   ?  A  ?   319  1
  ATOM    2544  CA   .  LYS  A  342  ?    5.30939  -29.63823   59.72104  1.000   25.74919  C   ?  A  ?   319  1
  ATOM    2545  C    .  LYS  A  342  ?    6.18455  -28.40894   59.93102  1.000   22.19970  C   ?  A  ?   319  1
  ATOM    2546  CB   .  LYS  A  342  ?    4.09444  -29.59750   60.64785  1.000   30.97965  C   ?  A  ?   319  1
  ATOM    2547  CG   .  LYS  A  342  ?    2.83271  -29.03003   60.00665  1.000   34.42806  C   ?  A  ?   319  1
  ATOM    2548  CD   .  LYS  A  342  ?    2.93150  -27.53034   59.77799  1.000   36.75109  C   ?  A  ?   319  1
  ATOM    2549  CE   .  LYS  A  342  ?    2.70697  -26.74935   61.06369  1.000   39.20339  C   ?  A  ?   319  1
  ATOM    2550  NZ   .  LYS  A  342  ?    1.26011  -26.64249   61.40311  1.000   39.07943  N   ?  A  ?   319  1
  ATOM    2551  O    .  GLY  A  343  ?    8.91425  -25.51707   57.75543  1.000   22.26271  O   ?  A  ?   320  1
  ATOM    2552  N    .  GLY  A  343  ?    6.16383  -27.50154   58.95732  1.000   16.47945  N   ?  A  ?   320  1
  ATOM    2553  CA   .  GLY  A  343  ?    7.02926  -26.34922   58.94296  1.000   14.16497  C   ?  A  ?   320  1
  ATOM    2554  C    .  GLY  A  343  ?    8.27428  -26.51785   58.09739  1.000   16.16270  C   ?  A  ?   320  1
  ATOM    2555  O    .  ASN  A  344  ?   10.49521  -28.35527   54.70564  1.000   11.96366  O   ?  A  ?   321  1
  ATOM    2556  N    .  ASN  A  344  ?    8.62931  -27.75281   57.74679  1.000   13.64708  N   ?  A  ?   321  1
  ATOM    2557  CA   .  ASN  A  344  ?    9.82547  -28.02930   56.96502  1.000   11.06260  C   ?  A  ?   321  1
  ATOM    2558  C    .  ASN  A  344  ?    9.54910  -28.18133   55.47881  1.000   10.69090  C   ?  A  ?   321  1
  ATOM    2559  CB   .  ASN  A  344  ?   10.51754  -29.29385   57.47892  1.000   15.49732  C   ?  A  ?   321  1
  ATOM    2560  CG   .  ASN  A  344  ?   11.09591  -29.11705   58.86365  1.000   17.73209  C   ?  A  ?   321  1
  ATOM    2561  OD1  .  ASN  A  344  ?   11.33130  -27.99429   59.31149  1.000   18.84040  O   ?  A  ?   321  1
  ATOM    2562  ND2  .  ASN  A  344  ?   11.33836  -30.22879   59.54952  1.000   19.09080  N   ?  A  ?   321  1
  ATOM    2563  N    .  TYR  A  345  ?    8.28925  -28.13102   55.05621  1.000    9.15033  N   ?  A  ?   322  1
  ATOM    2564  CA   .  TYR  A  345  ?    7.96618  -28.26170   53.64638  1.000    9.84532  C   ?  A  ?   322  1
  ATOM    2565  C    .  TYR  A  345  ?    7.05524  -27.12739   53.20575  1.000   10.51822  C   ?  A  ?   322  1
  ATOM    2566  O    .  TYR  A  345  ?    6.33268  -26.53099   54.00837  1.000    9.30134  O   ?  A  ?   322  1
  ATOM    2567  CB   .  TYR  A  345  ?    7.32188  -29.62708   53.32400  1.000   13.32209  C   ?  A  ?   322  1
  ATOM    2568  CG   .  TYR  A  345  ?    6.01068  -29.91328   54.01952  1.000   13.46074  C   ?  A  ?   322  1
  ATOM    2569  CD1  .  TYR  A  345  ?    4.80237  -29.58563   53.42426  1.000   13.80805  C   ?  A  ?   322  1
  ATOM    2570  CD2  .  TYR  A  345  ?    5.98102  -30.53726   55.25839  1.000   10.95051  C   ?  A  ?   322  1
  ATOM    2571  CE1  .  TYR  A  345  ?    3.60140  -29.85410   54.05104  1.000   14.18352  C   ?  A  ?   322  1
  ATOM    2572  CE2  .  TYR  A  345  ?    4.78643  -30.80928   55.89244  1.000    8.30684  C   ?  A  ?   322  1
  ATOM    2573  CZ   .  TYR  A  345  ?    3.59960  -30.46615   55.28539  1.000   13.87969  C   ?  A  ?   322  1
  ATOM    2574  OH   .  TYR  A  345  ?    2.40577  -30.73724   55.91360  1.000   14.99794  O   ?  A  ?   322  1
  ATOM    2575  N    .  LEU  A  346  ?    7.11532  -26.83233   51.91258  1.000    8.02170  N   ?  A  ?   323  1
  ATOM    2576  CA   .  LEU  A  346  ?    6.32627  -25.78145   51.29099  1.000    7.42960  C   ?  A  ?   323  1
  ATOM    2577  C    .  LEU  A  346  ?    5.43827  -26.40895   50.22823  1.000    7.45076  C   ?  A  ?   323  1
  ATOM    2578  O    .  LEU  A  346  ?    5.92339  -27.15537   49.37475  1.000   11.64093  O   ?  A  ?   323  1
  ATOM    2579  CB   .  LEU  A  346  ?    7.23454  -24.71561   50.67110  1.000    5.04110  C   ?  A  ?   323  1
  ATOM    2580  CG   .  LEU  A  346  ?    6.56188  -23.68941   49.76333  1.000    7.44245  C   ?  A  ?   323  1
  ATOM    2581  CD1  .  LEU  A  346  ?    5.65875  -22.79860   50.58173  1.000   13.13780  C   ?  A  ?   323  1
  ATOM    2582  CD2  .  LEU  A  346  ?    7.59363  -22.86761   49.00644  1.000    8.62882  C   ?  A  ?   323  1
  ATOM    2583  N    .  VAL  A  347  ?    4.14130  -26.12519   50.28608  1.000    8.40179  N   ?  A  ?   324  1
  ATOM    2584  CA   .  VAL  A  347  ?    3.18940  -26.63142   49.30535  1.000    9.52068  C   ?  A  ?   324  1
  ATOM    2585  C    .  VAL  A  347  ?    2.55187  -25.44754   48.59894  1.000    9.09361  C   ?  A  ?   324  1
  ATOM    2586  O    .  VAL  A  347  ?    2.13427  -24.48243   49.24960  1.000    8.97178  O   ?  A  ?   324  1
  ATOM    2587  CB   .  VAL  A  347  ?    2.10363  -27.51428   49.94965  1.000   13.54168  C   ?  A  ?   324  1
  ATOM    2588  CG1  .  VAL  A  347  ?    1.26879  -28.19242   48.86921  1.000   10.06798  C   ?  A  ?   324  1
  ATOM    2589  CG2  .  VAL  A  347  ?    2.72344  -28.54086   50.87143  1.000   12.91720  C   ?  A  ?   324  1
  ATOM    2590  N    .  PHE  A  348  ?    2.47746  -25.51852   47.27407  1.000   10.19778  N   ?  A  ?   325  1
  ATOM    2591  CA   .  PHE  A  348  ?    1.59610  -24.64576   46.51661  1.000    8.36546  C   ?  A  ?   325  1
  ATOM    2592  C    .  PHE  A  348  ?    0.65618  -25.51365   45.69477  1.000    6.71970  C   ?  A  ?   325  1
  ATOM    2593  O    .  PHE  A  348  ?    1.09019  -26.47596   45.05425  1.000   10.06164  O   ?  A  ?   325  1
  ATOM    2594  CB   .  PHE  A  348  ?    2.37087  -23.63657   45.64548  1.000    8.42644  C   ?  A  ?   325  1
  ATOM    2595  CG   .  PHE  A  348  ?    3.17838  -24.23962   44.52211  1.000    6.67855  C   ?  A  ?   325  1
  ATOM    2596  CD1  .  PHE  A  348  ?    2.63445  -24.37498   43.25489  1.000   10.62572  C   ?  A  ?   325  1
  ATOM    2597  CD2  .  PHE  A  348  ?    4.50161  -24.59755   44.71531  1.000    8.93938  C   ?  A  ?   325  1
  ATOM    2598  CE1  .  PHE  A  348  ?    3.38349  -24.89975   42.21218  1.000   13.29774  C   ?  A  ?   325  1
  ATOM    2599  CE2  .  PHE  A  348  ?    5.25562  -25.12438   43.67982  1.000   12.50178  C   ?  A  ?   325  1
  ATOM    2600  CZ   .  PHE  A  348  ?    4.69621  -25.27128   42.42557  1.000   13.39482  C   ?  A  ?   325  1
  ATOM    2601  N    .  LEU  A  349  ?   -0.63514  -25.20838   45.77311  1.000    6.15862  N   ?  A  ?   326  1
  ATOM    2602  CA   .  LEU  A  349  ?   -1.66699  -25.90895   45.02525  1.000    6.79542  C   ?  A  ?   326  1
  ATOM    2603  C    .  LEU  A  349  ?   -2.30545  -24.93401   44.05210  1.000    9.33524  C   ?  A  ?   326  1
  ATOM    2604  O    .  LEU  A  349  ?   -2.64560  -23.80762   44.42614  1.000   11.34325  O   ?  A  ?   326  1
  ATOM    2605  CB   .  LEU  A  349  ?   -2.73066  -26.50885   45.95381  1.000    7.02227  C   ?  A  ?   326  1
  ATOM    2606  CG   .  LEU  A  349  ?   -3.80654  -27.40249   45.31871  1.000    8.41942  C   ?  A  ?   326  1
  ATOM    2607  CD1  .  LEU  A  349  ?   -4.19551  -28.52217   46.27032  1.000   10.05391  C   ?  A  ?   326  1
  ATOM    2608  CD2  .  LEU  A  349  ?   -5.05132  -26.61517   44.90082  1.000    6.19635  C   ?  A  ?   326  1
  ATOM    2609  N    .  SER  A  350  ?   -2.46694  -25.36813   42.81015  1.000    9.09624  N   ?  A  ?   327  1
  ATOM    2610  CA   .  SER  A  350  ?   -3.10102  -24.54397   41.79780  1.000    3.12053  C   ?  A  ?   327  1
  ATOM    2611  C    .  SER  A  350  ?   -3.76857  -25.46703   40.78722  1.000    3.65159  C   ?  A  ?   327  1
  ATOM    2612  O    .  SER  A  350  ?   -3.97727  -26.65558   41.04681  1.000    7.92211  O   ?  A  ?   327  1
  ATOM    2613  CB   .  SER  A  350  ?   -2.07522  -23.60491   41.15063  1.000    3.11387  C   ?  A  ?   327  1
  ATOM    2614  OG   .  SER  A  350  ?   -2.71243  -22.64483   40.32883  1.000    4.31330  O   ?  A  ?   327  1
  ATOM    2615  N    .  ALA  A  351  ?   -4.11479  -24.91029   39.63297  1.000    6.37046  N   ?  A  ?   328  1
  ATOM    2616  CA   .  ALA  A  351  ?   -4.70043  -25.67634   38.54903  1.000    3.08904  C   ?  A  ?   328  1
  ATOM    2617  C    .  ALA  A  351  ?   -4.11490  -25.17698   37.24133  1.000    9.35629  C   ?  A  ?   328  1
  ATOM    2618  O    .  ALA  A  351  ?   -3.65751  -24.03730   37.13973  1.000   10.51718  O   ?  A  ?   328  1
  ATOM    2619  CB   .  ALA  A  351  ?   -6.22964  -25.56475   38.53102  1.000    3.09573  C   ?  A  ?   328  1
  ATOM    2620  N    .  ASP  A  352  ?   -4.11591  -26.05037   36.23881  1.000    6.63300  N   ?  A  ?   329  1
  ATOM    2621  CA   .  ASP  A  352  ?   -3.64076  -25.64500   34.92414  1.000    8.28455  C   ?  A  ?   329  1
  ATOM    2622  C    .  ASP  A  352  ?   -4.70336  -24.90877   34.12130  1.000    6.17614  C   ?  A  ?   329  1
  ATOM    2623  O    .  ASP  A  352  ?   -4.36407  -24.29082   33.10504  1.000    7.45400  O   ?  A  ?   329  1
  ATOM    2624  CB   .  ASP  A  352  ?   -3.12971  -26.86205   34.14496  1.000    9.76820  C   ?  A  ?   329  1
  ATOM    2625  CG   .  ASP  A  352  ?   -4.13619  -27.99158   34.08660  1.000    7.22229  C   ?  A  ?   329  1
  ATOM    2626  OD1  .  ASP  A  352  ?   -5.11011  -27.98607   34.87017  1.000    5.14635  O   ?  A  ?   329  1
  ATOM    2627  OD2  .  ASP  A  352  ?   -3.94073  -28.90115   33.25574  1.000   10.90067  O   ?  A  ?   329  1
  ATOM    2628  N    .  HIS  A  353  ?   -5.96028  -24.94666   34.57406  1.000    3.60372  N   ?  A  ?   330  1
  ATOM    2629  CA   .  HIS  A  353  ?   -7.09116  -24.27329   33.94624  1.000    4.60146  C   ?  A  ?   330  1
  ATOM    2630  C    .  HIS  A  353  ?   -8.36701  -24.63483   34.69356  1.000    7.95377  C   ?  A  ?   330  1
  ATOM    2631  O    .  HIS  A  353  ?   -8.36617  -25.54171   35.53230  1.000    8.20786  O   ?  A  ?   330  1
  ATOM    2632  CB   .  HIS  A  353  ?   -7.22714  -24.67392   32.47921  1.000    6.81639  C   ?  A  ?   330  1
  ATOM    2633  CG   .  HIS  A  353  ?   -7.22966  -26.15323   32.27449  1.000    8.19010  C   ?  A  ?   330  1
  ATOM    2634  CD2  .  HIS  A  353  ?   -6.26580  -26.99491   31.83273  1.000    8.01014  C   ?  A  ?   330  1
  ATOM    2635  ND1  .  HIS  A  353  ?   -8.31501  -26.94237   32.58720  1.000    9.56658  N   ?  A  ?   330  1
  ATOM    2636  CE1  .  HIS  A  353  ?   -8.02584  -28.20510   32.33062  1.000   10.35061  C   ?  A  ?   330  1
  ATOM    2637  NE2  .  HIS  A  353  ?   -6.78852  -28.26445   31.87217  1.000   11.52644  N   ?  A  ?   330  1
  ATOM    2638  N    .  GLY  A  354  ?   -9.45473  -23.94297   34.39484  1.000    7.44580  N   ?  A  ?   331  1
  ATOM    2639  CA   .  GLY  A  354  ?  -10.77455  -24.30319   34.87935  1.000    4.90852  C   ?  A  ?   331  1
  ATOM    2640  C    .  GLY  A  354  ?  -11.52791  -25.12793   33.85976  1.000    7.60086  C   ?  A  ?   331  1
  ATOM    2641  O    .  GLY  A  354  ?  -10.94444  -25.94949   33.14428  1.000    7.67481  O   ?  A  ?   331  1
  ATOM    2642  O    .  ALA  A  355  ?  -15.47598  -24.27425   33.70527  1.000    9.74047  O   ?  A  ?   332  1
  ATOM    2643  N    .  ALA  A  355  ?  -12.83588  -24.90179   33.78592  1.000    7.80151  N   ?  A  ?   332  1
  ATOM    2644  CA   .  ALA  A  355  ?  -13.67429  -25.57253   32.80425  1.000    7.49360  C   ?  A  ?   332  1
  ATOM    2645  C    .  ALA  A  355  ?  -15.00643  -24.85080   32.72110  1.000    8.45974  C   ?  A  ?   332  1
  ATOM    2646  CB   .  ALA  A  355  ?  -13.90115  -27.04596   33.15592  1.000    7.59194  C   ?  A  ?   332  1
  ATOM    2647  O    .  ALA  A  356  ?  -17.74288  -26.49692   32.05302  1.000   11.17665  O   ?  A  ?   333  1
  ATOM    2648  N    .  ALA  A  356  ?  -15.60993  -24.89809   31.53777  1.000   10.26023  N   ?  A  ?   333  1
  ATOM    2649  CA   .  ALA  A  356  ?  -16.93325  -24.33186   31.35161  1.000   10.68580  C   ?  A  ?   333  1
  ATOM    2650  C    .  ALA  A  356  ?  -18.00124  -25.31358   31.82059  1.000   11.01271  C   ?  A  ?   333  1
  ATOM    2651  CB   .  ALA  A  356  ?  -17.16506  -23.96632   29.88719  1.000    9.88202  C   ?  A  ?   333  1
  ATOM    2652  O    .  HIS  A  357  ?  -20.42633  -25.88771   29.79815  1.000    8.57552  O   ?  A  ?   334  1
  ATOM    2653  N    .  HIS  A  357  ?  -19.21899  -24.80569   31.96804  1.000   10.99405  N   ?  A  ?   334  1
  ATOM    2654  CA   .  HIS  A  357  ?  -20.35346  -25.68302   32.19445  1.000    9.71452  C   ?  A  ?   334  1
  ATOM    2655  C    .  HIS  A  357  ?  -20.71552  -26.38312   30.89152  1.000    9.99249  C   ?  A  ?   334  1
  ATOM    2656  CB   .  HIS  A  357  ?  -21.55434  -24.90192   32.72740  1.000    7.61924  C   ?  A  ?   334  1
  ATOM    2657  CG   .  HIS  A  357  ?  -21.30386  -24.22336   34.03778  1.000    7.92375  C   ?  A  ?   334  1
  ATOM    2658  ND1  .  HIS  A  357  ?  -21.49578  -24.85193   35.24893  1.000   10.96104  N   ?  A  ?   334  1
  ATOM    2659  CD2  .  HIS  A  357  ?  -20.88294  -22.96942   34.32732  1.000    9.67080  C   ?  A  ?   334  1
  ATOM    2660  CE1  .  HIS  A  357  ?  -21.20088  -24.01594   36.22839  1.000   12.07350  C   ?  A  ?   334  1
  ATOM    2661  NE2  .  HIS  A  357  ?  -20.82680  -22.86649   35.69632  1.000   11.38679  N   ?  A  ?   334  1
  ATOM    2662  O    .  SER  A  358  ?  -23.60509  -26.79250   29.59679  1.000   11.70687  O   ?  A  ?   335  1
  ATOM    2663  N    .  SER  A  358  ?  -21.33487  -27.55453   31.01620  1.000    9.22694  N   ?  A  ?   335  1
  ATOM    2664  CA   .  SER  A  358  ?  -21.74503  -28.30644   29.83825  1.000    9.98854  C   ?  A  ?   335  1
  ATOM    2665  C    .  SER  A  358  ?  -22.78303  -27.52559   29.04048  1.000    9.13914  C   ?  A  ?   335  1
  ATOM    2666  CB   .  SER  A  358  ?  -22.31370  -29.66506   30.24325  1.000   11.50562  C   ?  A  ?   335  1
  ATOM    2667  OG   .  SER  A  358  ?  -21.35771  -30.43249   30.95222  1.000   12.07414  O   ?  A  ?   335  1
  ATOM    2668  O    .  VAL  A  359  ?  -25.98471  -26.47633   27.25386  1.000   12.78726  O   ?  A  ?   336  1
  ATOM    2669  N    .  VAL  A  359  ?  -22.73919  -27.69174   27.71656  1.000    8.53021  N   ?  A  ?   336  1
  ATOM    2670  CA   .  VAL  A  359  ?  -23.66387  -26.96634   26.84938  1.000   12.07867  C   ?  A  ?   336  1
  ATOM    2671  C    .  VAL  A  359  ?  -25.10553  -27.34288   27.17004  1.000   11.76883  C   ?  A  ?   336  1
  ATOM    2672  CB   .  VAL  A  359  ?  -23.31963  -27.22015   25.36957  1.000   12.06335  C   ?  A  ?   336  1
  ATOM    2673  CG1  .  VAL  A  359  ?  -24.42192  -26.69425   24.46874  1.000   12.48044  C   ?  A  ?   336  1
  ATOM    2674  CG2  .  VAL  A  359  ?  -21.99219  -26.56281   25.01722  1.000   13.74552  C   ?  A  ?   336  1
  ATOM    2675  O    .  GLY  A  360  ?  -28.35505  -28.28242   29.26143  1.000    9.72897  O   ?  A  ?   337  1
  ATOM    2676  N    .  GLY  A  360  ?  -25.36972  -28.63626   27.36954  1.000   11.54232  N   ?  A  ?   337  1
  ATOM    2677  CA   .  GLY  A  360  ?  -26.71590  -29.06347   27.70968  1.000    9.76667  C   ?  A  ?   337  1
  ATOM    2678  C    .  GLY  A  360  ?  -27.16993  -28.56643   29.06585  1.000    8.42189  C   ?  A  ?   337  1
  ATOM    2679  O    .  PHE  A  361  ?  -27.98371  -25.98974   31.74221  1.000    8.11224  O   ?  A  ?   338  1
  ATOM    2680  N    .  PHE  A  361  ?  -26.24150  -28.45634   30.01737  1.000    8.64713  N   ?  A  ?   338  1
  ATOM    2681  CA   .  PHE  A  361  ?  -26.56950  -27.88829   31.32074  1.000    7.30303  C   ?  A  ?   338  1
  ATOM    2682  C    .  PHE  A  361  ?  -26.96805  -26.42537   31.18740  1.000    7.89909  C   ?  A  ?   338  1
  ATOM    2683  CB   .  PHE  A  361  ?  -25.37580  -28.04135   32.26611  1.000    7.22105  C   ?  A  ?   338  1
  ATOM    2684  CG   .  PHE  A  361  ?  -25.53987  -27.33019   33.58085  1.000    6.99525  C   ?  A  ?   338  1
  ATOM    2685  CD1  .  PHE  A  361  ?  -26.15314  -27.95770   34.64890  1.000    9.97637  C   ?  A  ?   338  1
  ATOM    2686  CD2  .  PHE  A  361  ?  -25.06251  -26.03931   33.75375  1.000    9.57949  C   ?  A  ?   338  1
  ATOM    2687  CE1  .  PHE  A  361  ?  -26.30002  -27.31022   35.86140  1.000    9.54248  C   ?  A  ?   338  1
  ATOM    2688  CE2  .  PHE  A  361  ?  -25.20749  -25.38857   34.96338  1.000    9.85657  C   ?  A  ?   338  1
  ATOM    2689  CZ   .  PHE  A  361  ?  -25.82595  -26.02426   36.01793  1.000    8.85160  C   ?  A  ?   338  1
  ATOM    2690  O    .  MET  A  362  ?  -28.51614  -23.07937   29.88023  1.000   11.73682  O   ?  A  ?   339  1
  ATOM    2691  N    .  MET  A  362  ?  -26.17558  -25.65159   30.44378  1.000    6.23783  N   ?  A  ?   339  1
  ATOM    2692  CA   .  MET  A  362  ?  -26.45377  -24.22803   30.29269  1.000   10.61816  C   ?  A  ?   339  1
  ATOM    2693  C    .  MET  A  362  ?  -27.75510  -23.99092   29.53842  1.000   11.28312  C   ?  A  ?   339  1
  ATOM    2694  CB   .  MET  A  362  ?  -25.28536  -23.54570   29.58709  1.000   11.09999  C   ?  A  ?   339  1
  ATOM    2695  CG   .  MET  A  362  ?  -23.99780  -23.62468   30.37123  1.000   14.55617  C   ?  A  ?   339  1
  ATOM    2696  SD   .  MET  A  362  ?  -24.10184  -22.64048   31.87088  1.000   16.59892  S   ?  A  ?   339  1
  ATOM    2697  CE   .  MET  A  362  ?  -23.20212  -21.19018   31.34135  1.000   16.38343  C   ?  A  ?   339  1
  ATOM    2698  O    .  GLN  A  363  ?  -31.50741  -24.28320   28.62773  1.000   14.56035  O   ?  A  ?   340  1
  ATOM    2699  N    .  GLN  A  363  ?  -28.02913  -24.79738   28.51048  1.000    8.75628  N   ?  A  ?   340  1
  ATOM    2700  CA   .  GLN  A  363  ?  -29.29231  -24.66320   27.79159  1.000   11.96603  C   ?  A  ?   340  1
  ATOM    2701  C    .  GLN  A  363  ?  -30.47443  -24.95916   28.70014  1.000   14.23204  C   ?  A  ?   340  1
  ATOM    2702  CB   .  GLN  A  363  ?  -29.31308  -25.59010   26.58030  1.000   12.19918  C   ?  A  ?   340  1
  ATOM    2703  CG   .  GLN  A  363  ?  -28.42977  -25.12784   25.45462  1.000   16.75904  C   ?  A  ?   340  1
  ATOM    2704  CD   .  GLN  A  363  ?  -28.28170  -26.17052   24.37644  1.000   21.78952  C   ?  A  ?   340  1
  ATOM    2705  OE1  .  GLN  A  363  ?  -28.52847  -27.35497   24.60473  1.000   22.37464  O   ?  A  ?   340  1
  ATOM    2706  NE2  .  GLN  A  363  ?  -27.87299  -25.73793   23.18867  1.000   25.20721  N   ?  A  ?   340  1
  ATOM    2707  O    .  ALA  A  364  ?  -32.85158  -25.02502   31.92480  1.000   21.01454  O   ?  A  ?   341  1
  ATOM    2708  N    .  ALA  A  364  ?  -30.33700  -25.96356   29.56916  1.000   14.67893  N   ?  A  ?   341  1
  ATOM    2709  CA   .  ALA  A  364  ?  -31.41326  -26.29415   30.49414  1.000   15.81281  C   ?  A  ?   341  1
  ATOM    2710  C    .  ALA  A  364  ?  -31.72466  -25.13552   31.42953  1.000   17.75543  C   ?  A  ?   341  1
  ATOM    2711  CB   .  ALA  A  364  ?  -31.05122  -27.54176   31.29876  1.000   16.08285  C   ?  A  ?   341  1
  ATOM    2712  O    .  HIS  A  365  ?  -30.57373  -20.75952   32.47719  1.000   12.41099  O   ?  A  ?   342  1
  ATOM    2713  N    .  HIS  A  365  ?  -30.75112  -24.25912   31.67622  1.000   12.76904  N   ?  A  ?   342  1
  ATOM    2714  CA   .  HIS  A  365  ?  -30.93315  -23.12666   32.57333  1.000   13.60682  C   ?  A  ?   342  1
  ATOM    2715  C    .  HIS  A  365  ?  -30.83896  -21.78728   31.84655  1.000   11.46602  C   ?  A  ?   342  1
  ATOM    2716  CB   .  HIS  A  365  ?  -29.92503  -23.20973   33.71860  1.000   14.59228  C   ?  A  ?   342  1
  ATOM    2717  CG   .  HIS  A  365  ?  -29.99938  -24.49553   34.48302  1.000   16.62352  C   ?  A  ?   342  1
  ATOM    2718  ND1  .  HIS  A  365  ?  -29.19395  -25.57779   34.20084  1.000   17.97804  N   ?  A  ?   342  1
  ATOM    2719  CD2  .  HIS  A  365  ?  -30.80195  -24.88064   35.50313  1.000   16.94434  C   ?  A  ?   342  1
  ATOM    2720  CE1  .  HIS  A  365  ?  -29.48648  -26.56868   35.02388  1.000   16.81499  C   ?  A  ?   342  1
  ATOM    2721  NE2  .  HIS  A  365  ?  -30.45952  -26.17172   35.82379  1.000   18.66896  N   ?  A  ?   342  1
  ATOM    2722  O    .  LYS  A  366  ?  -30.07871  -18.50802   29.36021  1.000   11.84710  O   ?  A  ?   343  1
  ATOM    2723  N    .  LYS  A  366  ?  -31.04712  -21.78725   30.52805  1.000   12.43582  N   ?  A  ?   343  1
  ATOM    2724  C    .  LYS  A  366  ?  -29.97391  -19.70220   29.65832  1.000   10.68277  C   ?  A  ?   343  1
  ATOM    2725  CA   .  LYS  A  366  ?  -31.21658  -20.58706   29.71178  1.000   11.18381  C   ?  A  ?   343  1
  ATOM    2726  CB   .  LYS  A  366  ?  -32.42315  -19.76787   30.18743  1.000   17.46049  C   ?  A  ?   343  1
  ATOM    2727  CG   .  LYS  A  366  ?  -33.74973  -20.48891   30.01395  1.000   19.26294  C   ?  A  ?   343  1
  ATOM    2728  CD   .  LYS  A  366  ?  -34.93546  -19.55799   30.20915  1.000   21.03147  C   ?  A  ?   343  1
  ATOM    2729  CE   .  LYS  A  366  ?  -35.48631  -19.64747   31.61824  1.000   21.33327  C   ?  A  ?   343  1
  ATOM    2730  NZ   .  LYS  A  366  ?  -36.84884  -19.04752   31.72405  1.000   23.72842  N   ?  A  ?   343  1
  ATOM    2731  O    .  MET  A  367  ?  -27.21768  -20.29317   27.67073  1.000   12.27434  O   ?  A  ?   344  1
  ATOM    2732  N    .  MET  A  367  ?  -28.79351  -20.25924   29.91014  1.000   10.00271  N   ?  A  ?   344  1
  ATOM    2733  CA   .  MET  A  367  ?  -27.57735  -19.46160   29.89526  1.000    8.09163  C   ?  A  ?   344  1
  ATOM    2734  C    .  MET  A  367  ?  -26.98476  -19.39872   28.49039  1.000   10.00181  C   ?  A  ?   344  1
  ATOM    2735  CB   .  MET  A  367  ?  -26.54910  -20.04680   30.85798  1.000    6.58339  C   ?  A  ?   344  1
  ATOM    2736  CG   .  MET  A  367  ?  -26.99858  -20.04469   32.30655  1.000   10.16138  C   ?  A  ?   344  1
  ATOM    2737  SD   .  MET  A  367  ?  -27.16147  -18.37111   32.95632  1.000   13.60550  S   ?  A  ?   344  1
  ATOM    2738  CE   .  MET  A  367  ?  -28.01022  -18.67718   34.50244  1.000   14.46030  C   ?  A  ?   344  1
  ATOM    2739  O    .  PRO  A  368  ?  -23.70247  -19.61602   27.49263  1.000   12.82460  O   ?  A  ?   345  1
  ATOM    2740  N    .  PRO  A  368  ?  -26.21845  -18.35083   28.18498  1.000   10.62932  N   ?  A  ?   345  1
  ATOM    2741  CA   .  PRO  A  368  ?  -25.58638  -18.26818   26.86175  1.000   10.27917  C   ?  A  ?   345  1
  ATOM    2742  C    .  PRO  A  368  ?  -24.59729  -19.40659   26.67130  1.000    9.01686  C   ?  A  ?   345  1
  ATOM    2743  CB   .  PRO  A  368  ?  -24.87947  -16.90687   26.88531  1.000   12.90839  C   ?  A  ?   345  1
  ATOM    2744  CG   .  PRO  A  368  ?  -25.52649  -16.14582   27.97080  1.000   10.30145  C   ?  A  ?   345  1
  ATOM    2745  CD   .  PRO  A  368  ?  -25.93929  -17.15543   28.99923  1.000    9.42594  C   ?  A  ?   345  1
  ATOM    2746  O    .  THR  A  369  ?  -24.96027  -21.17504   23.15115  1.000   12.47464  O   ?  A  ?   346  1
  ATOM    2747  N    .  THR  A  369  ?  -24.76480  -20.14636   25.58356  1.000    9.99545  N   ?  A  ?   346  1
  ATOM    2748  CA   .  THR  A  369  ?  -23.91931  -21.30509   25.32110  1.000    9.02694  C   ?  A  ?   346  1
  ATOM    2749  C    .  THR  A  369  ?  -24.13732  -21.74026   23.87785  1.000   11.18443  C   ?  A  ?   346  1
  ATOM    2750  CB   .  THR  A  369  ?  -24.21651  -22.44769   26.29420  1.000   11.31740  C   ?  A  ?   346  1
  ATOM    2751  OG1  .  THR  A  369  ?  -23.21971  -23.46833   26.15939  1.000   14.70125  O   ?  A  ?   346  1
  ATOM    2752  CG2  .  THR  A  369  ?  -25.59188  -23.03893   26.01470  1.000    9.92172  C   ?  A  ?   346  1
  ATOM    2753  O    .  GLY  A  370  ?  -21.36284  -24.28935   22.66460  1.000    8.98267  O   ?  A  ?   347  1
  ATOM    2754  N    .  GLY  A  370  ?  -23.39600  -22.76041   23.47613  1.000   12.87959  N   ?  A  ?   347  1
  ATOM    2755  CA   .  GLY  A  370  ?  -23.45719  -23.25678   22.11898  1.000   10.46374  C   ?  A  ?   347  1
  ATOM    2756  C    .  GLY  A  370  ?  -22.19774  -24.03651   21.79760  1.000    9.92660  C   ?  A  ?   347  1
  ATOM    2757  O    .  PHE  A  371  ?  -20.75033  -23.57405   18.21776  1.000   13.17371  O   ?  A  ?   348  1
  ATOM    2758  N    .  PHE  A  371  ?  -22.08057  -24.40531   20.52599  1.000   12.90814  N   ?  A  ?   348  1
  ATOM    2759  CA   .  PHE  A  371  ?  -20.92494  -25.13794   20.03261  1.000   15.45345  C   ?  A  ?   348  1
  ATOM    2760  C    .  PHE  A  371  ?  -20.15740  -24.30053   19.02218  1.000   13.95073  C   ?  A  ?   348  1
  ATOM    2761  CB   .  PHE  A  371  ?  -21.33504  -26.46593   19.40335  1.000   21.23012  C   ?  A  ?   348  1
  ATOM    2762  CG   .  PHE  A  371  ?  -21.87921  -27.44573   20.38959  1.000   23.34046  C   ?  A  ?   348  1
  ATOM    2763  CD1  .  PHE  A  371  ?  -21.03302  -28.10277   21.26598  1.000   22.91197  C   ?  A  ?   348  1
  ATOM    2764  CD2  .  PHE  A  371  ?  -23.23723  -27.69728   20.45561  1.000   26.31496  C   ?  A  ?   348  1
  ATOM    2765  CE1  .  PHE  A  371  ?  -21.52939  -29.00148   22.18405  1.000   24.79048  C   ?  A  ?   348  1
  ATOM    2766  CE2  .  PHE  A  371  ?  -23.74079  -28.59553   21.37062  1.000   27.07818  C   ?  A  ?   348  1
  ATOM    2767  CZ   .  PHE  A  371  ?  -22.88594  -29.24956   22.23615  1.000   26.48750  C   ?  A  ?   348  1
  ATOM    2768  O    .  PHE  A  372  ?  -18.48773  -25.31923   16.53147  1.000   28.97843  O   ?  A  ?   349  1
  ATOM    2769  N    .  PHE  A  372  ?  -18.83639  -24.42023   19.07155  1.000   13.06359  N   ?  A  ?   349  1
  ATOM    2770  CA   .  PHE  A  372  ?  -17.94201  -23.67627   18.19897  1.000   21.28701  C   ?  A  ?   349  1
  ATOM    2771  C    .  PHE  A  372  ?  -17.97064  -24.22793   16.77667  1.000   25.88621  C   ?  A  ?   349  1
  ATOM    2772  CB   .  PHE  A  372  ?  -16.52262  -23.72045   18.76367  1.000   25.89257  C   ?  A  ?   349  1
  ATOM    2773  CG   .  PHE  A  372  ?  -15.56384  -22.79800   18.07860  1.000   29.70666  C   ?  A  ?   349  1
  ATOM    2774  CD1  .  PHE  A  372  ?  -15.65678  -21.43188   18.25438  1.000   31.88968  C   ?  A  ?   349  1
  ATOM    2775  CD2  .  PHE  A  372  ?  -14.55433  -23.29891   17.27686  1.000   33.43780  C   ?  A  ?   349  1
  ATOM    2776  CE1  .  PHE  A  372  ?  -14.76910  -20.58006   17.63235  1.000   34.70027  C   ?  A  ?   349  1
  ATOM    2777  CE2  .  PHE  A  372  ?  -13.66228  -22.45215   16.65297  1.000   34.36878  C   ?  A  ?   349  1
  ATOM    2778  CZ   .  PHE  A  372  ?  -13.77009  -21.09312   16.83059  1.000   34.63774  C   ?  A  ?   349  1
  ATOM    2779  O    .  ASP  A  375  ?  -15.10029  -28.08604    9.06704  1.000   29.78541  O   ?  A  ?   350  1
  ATOM    2780  N    .  ASP  A  375  ?  -16.47832  -28.58010   12.09907  1.000   39.13456  N   ?  A  ?   350  1
  ATOM    2781  CA   .  ASP  A  375  ?  -15.53669  -29.17940   11.15968  1.000   36.06124  C   ?  A  ?   350  1
  ATOM    2782  C    .  ASP  A  375  ?  -14.92441  -28.09378   10.28538  1.000   32.05204  C   ?  A  ?   350  1
  ATOM    2783  CB   .  ASP  A  375  ?  -16.22987  -30.23752   10.30001  1.000   36.91674  C   ?  A  ?   350  1
  ATOM    2784  O    .  MET  A  376  ?  -12.86584  -25.66243    8.05289  1.000   20.41191  O   ?  A  ?   351  1
  ATOM    2785  N    .  MET  A  376  ?  -14.18941  -27.18424   10.92853  1.000   30.25518  N   ?  A  ?   351  1
  ATOM    2786  CA   .  MET  A  376  ?  -13.75043  -25.96670   10.25546  1.000   25.05444  C   ?  A  ?   351  1
  ATOM    2787  C    .  MET  A  376  ?  -12.76303  -26.25571    9.13186  1.000   21.08574  C   ?  A  ?   351  1
  ATOM    2788  CB   .  MET  A  376  ?  -13.13536  -25.00313   11.26581  1.000   26.80753  C   ?  A  ?   351  1
  ATOM    2789  CG   .  MET  A  376  ?  -12.54528  -23.75444   10.63923  1.000   30.51451  C   ?  A  ?   351  1
  ATOM    2790  SD   .  MET  A  376  ?  -11.65284  -22.77364   11.85243  1.000   34.35193  S   ?  A  ?   351  1
  ATOM    2791  CE   .  MET  A  376  ?  -12.95867  -22.47847   13.03954  1.000   32.23619  C   ?  A  ?   351  1
  ATOM    2792  N    .  LYS  A  377  ?  -11.79277  -27.14650    9.36098  1.000   17.37201  N   ?  A  ?   352  1
  ATOM    2793  CA   .  LYS  A  377  ?  -10.77459  -27.38920    8.34129  1.000   16.05478  C   ?  A  ?   352  1
  ATOM    2794  C    .  LYS  A  377  ?  -11.40086  -27.91161    7.05445  1.000   16.49152  C   ?  A  ?   352  1
  ATOM    2795  O    .  LYS  A  377  ?  -11.09749  -27.42365    5.96065  1.000   12.70699  O   ?  A  ?   352  1
  ATOM    2796  CB   .  LYS  A  377  ?   -9.71262  -28.36555    8.85152  1.000   19.23302  C   ?  A  ?   352  1
  ATOM    2797  CG   .  LYS  A  377  ?   -8.57715  -28.56728    7.84949  1.000   21.21614  C   ?  A  ?   352  1
  ATOM    2798  CD   .  LYS  A  377  ?   -7.63852  -29.71434    8.20935  1.000   22.52416  C   ?  A  ?   352  1
  ATOM    2799  CE   .  LYS  A  377  ?   -6.63651  -29.95217    7.07794  1.000   23.69578  C   ?  A  ?   352  1
  ATOM    2800  NZ   .  LYS  A  377  ?   -5.62937  -31.00301    7.38766  1.000   23.18603  N   ?  A  ?   352  1
  ATOM    2801  N    .  LYS  A  378  ?  -12.28822  -28.90120    7.16891  1.000   24.50498  N   ?  A  ?   353  1
  ATOM    2802  CA   .  LYS  A  378  ?  -12.94158  -29.45783    5.98822  1.000   29.07909  C   ?  A  ?   353  1
  ATOM    2803  C    .  LYS  A  378  ?  -13.89254  -28.44772    5.35811  1.000   28.65021  C   ?  A  ?   353  1
  ATOM    2804  O    .  LYS  A  378  ?  -13.88285  -28.24610    4.13796  1.000   26.84407  O   ?  A  ?   353  1
  ATOM    2805  CB   .  LYS  A  378  ?  -13.68913  -30.73890    6.36136  1.000   31.75452  C   ?  A  ?   353  1
  ATOM    2806  N    .  GLU  A  379  ?  -14.71807  -27.79756    6.18107  1.000   27.69715  N   ?  A  ?   354  1
  ATOM    2807  CA   .  GLU  A  379  ?  -15.71511  -26.86596    5.66299  1.000   26.54031  C   ?  A  ?   354  1
  ATOM    2808  C    .  GLU  A  379  ?  -15.05969  -25.65183    5.01437  1.000   24.28197  C   ?  A  ?   354  1
  ATOM    2809  O    .  GLU  A  379  ?  -15.43908  -25.24514    3.90999  1.000   22.60202  O   ?  A  ?   354  1
  ATOM    2810  CB   .  GLU  A  379  ?  -16.65549  -26.43229    6.78782  1.000   26.33831  C   ?  A  ?   354  1
  ATOM    2811  N    .  MET  A  380  ?  -14.07451  -25.05471    5.68841  1.000   22.58017  N   ?  A  ?   355  1
  ATOM    2812  CA   .  MET  A  380  ?  -13.44136  -23.85731    5.14661  1.000   22.35072  C   ?  A  ?   355  1
  ATOM    2813  C    .  MET  A  380  ?  -12.58614  -24.17402    3.92676  1.000   21.74655  C   ?  A  ?   355  1
  ATOM    2814  O    .  MET  A  380  ?  -12.47952  -23.34398    3.01642  1.000   22.84348  O   ?  A  ?   355  1
  ATOM    2815  CB   .  MET  A  380  ?  -12.60140  -23.17100    6.22433  1.000   23.40449  C   ?  A  ?   355  1
  ATOM    2816  CG   .  MET  A  380  ?  -12.07287  -21.80277    5.83080  1.000   24.38520  C   ?  A  ?   355  1
  ATOM    2817  SD   .  MET  A  380  ?  -13.36259  -20.56364    5.61461  1.000   26.36851  S   ?  A  ?   355  1
  ATOM    2818  CE   .  MET  A  380  ?  -13.95543  -20.39268    7.29589  1.000   23.14109  C   ?  A  ?   355  1
  ATOM    2819  N    .  ASN  A  381  ?  -11.97159  -25.35880    3.88686  1.000   19.04623  N   ?  A  ?   356  1
  ATOM    2820  CA   .  ASN  A  381  ?  -11.17605  -25.72995    2.72180  1.000   17.15514  C   ?  A  ?   356  1
  ATOM    2821  C    .  ASN  A  381  ?  -12.04391  -25.85429    1.47858  1.000   17.35707  C   ?  A  ?   356  1
  ATOM    2822  O    .  ASN  A  381  ?  -11.60982  -25.50375    0.37702  1.000   20.14215  O   ?  A  ?   356  1
  ATOM    2823  CB   .  ASN  A  381  ?  -10.42632  -27.03344    2.98404  1.000   13.87624  C   ?  A  ?   356  1
  ATOM    2824  CG   .  ASN  A  381  ?   -9.03624  -26.80046    3.53586  1.000   15.71180  C   ?  A  ?   356  1
  ATOM    2825  OD1  .  ASN  A  381  ?   -8.45408  -25.73470    3.33858  1.000   17.87599  O   ?  A  ?   356  1
  ATOM    2826  ND2  .  ASN  A  381  ?   -8.49264  -27.79777    4.22409  1.000   10.65384  N   ?  A  ?   356  1
  ATOM    2827  N    .  ALA  A  382  ?  -13.27483  -26.34815    1.63715  1.000   18.16882  N   ?  A  ?   357  1
  ATOM    2828  CA   .  ALA  A  382  ?  -14.20840  -26.39413    0.51649  1.000   18.72763  C   ?  A  ?   357  1
  ATOM    2829  C    .  ALA  A  382  ?  -14.50741  -24.99540   -0.00313  1.000   20.53855  C   ?  A  ?   357  1
  ATOM    2830  O    .  ALA  A  382  ?  -14.59453  -24.78043   -1.21743  1.000   19.46662  O   ?  A  ?   357  1
  ATOM    2831  CB   .  ALA  A  382  ?  -15.49968  -27.09696    0.93656  1.000   17.82012  C   ?  A  ?   357  1
  ATOM    2832  N    .  LYS  A  383  ?  -14.66037  -24.02880    0.90381  1.000   22.99942  N   ?  A  ?   358  1
  ATOM    2833  CA   .  LYS  A  383  ?  -14.91464  -22.65451    0.48676  1.000   25.63521  C   ?  A  ?   358  1
  ATOM    2834  C    .  LYS  A  383  ?  -13.66172  -22.02254   -0.10630  1.000   23.69433  C   ?  A  ?   358  1
  ATOM    2835  O    .  LYS  A  383  ?  -13.71902  -21.38646   -1.16525  1.000   26.76093  O   ?  A  ?   358  1
  ATOM    2836  CB   .  LYS  A  383  ?  -15.43518  -21.83727    1.66924  1.000   29.87150  C   ?  A  ?   358  1
  ATOM    2837  CG   .  LYS  A  383  ?  -16.68947  -22.42559    2.29494  1.000   34.88376  C   ?  A  ?   358  1
  ATOM    2838  CD   .  LYS  A  383  ?  -17.68717  -21.34933    2.69029  1.000   39.37614  C   ?  A  ?   358  1
  ATOM    2839  CE   .  LYS  A  383  ?  -17.37266  -20.77253    4.05751  1.000   42.76218  C   ?  A  ?   358  1
  ATOM    2840  NZ   .  LYS  A  383  ?  -17.39699  -21.82509    5.11054  1.000   45.09986  N   ?  A  ?   358  1
  ATOM    2841  N    .  LEU  A  384  ?  -12.51734  -22.18580    0.56525  1.000   18.16987  N   ?  A  ?   359  1
  ATOM    2842  CA   .  LEU  A  384  ?  -11.25429  -21.72522   -0.00293  1.000   17.27353  C   ?  A  ?   359  1
  ATOM    2843  C    .  LEU  A  384  ?  -11.00979  -22.35594   -1.36604  1.000   19.36006  C   ?  A  ?   359  1
  ATOM    2844  O    .  LEU  A  384  ?  -10.50533  -21.69828   -2.28394  1.000   20.11470  O   ?  A  ?   359  1
  ATOM    2845  CB   .  LEU  A  384  ?  -10.09875  -22.04448    0.94726  1.000   15.89065  C   ?  A  ?   359  1
  ATOM    2846  CG   .  LEU  A  384  ?   -9.98902  -21.20186    2.21684  1.000   15.48825  C   ?  A  ?   359  1
  ATOM    2847  CD1  .  LEU  A  384  ?   -8.93606  -21.77965    3.15122  1.000   14.99286  C   ?  A  ?   359  1
  ATOM    2848  CD2  .  LEU  A  384  ?   -9.65420  -19.76222    1.85830  1.000   17.28392  C   ?  A  ?   359  1
  ATOM    2849  N    .  LYS  A  385  ?  -11.36630  -23.63444   -1.51383  1.000   20.18374  N   ?  A  ?   360  1
  ATOM    2850  CA   .  LYS  A  385  ?  -11.27431  -24.29093   -2.81340  1.000   24.08506  C   ?  A  ?   360  1
  ATOM    2851  C    .  LYS  A  385  ?  -12.11686  -23.56101   -3.85227  1.000   27.06819  C   ?  A  ?   360  1
  ATOM    2852  O    .  LYS  A  385  ?  -11.63007  -23.22571   -4.93762  1.000   22.52116  O   ?  A  ?   360  1
  ATOM    2853  CB   .  LYS  A  385  ?  -11.70695  -25.75446   -2.69298  1.000   23.88428  C   ?  A  ?   360  1
  ATOM    2854  CG   .  LYS  A  385  ?  -11.81762  -26.48854   -4.01486  1.000   23.16238  C   ?  A  ?   360  1
  ATOM    2855  CD   .  LYS  A  385  ?  -10.53181  -26.38384   -4.80846  1.000   24.74707  C   ?  A  ?   360  1
  ATOM    2856  CE   .  LYS  A  385  ?  -10.67470  -27.03219   -6.17441  1.000   25.93460  C   ?  A  ?   360  1
  ATOM    2857  NZ   .  LYS  A  385  ?  -10.94688  -28.49261   -6.08198  1.000   23.88361  N   ?  A  ?   360  1
  ATOM    2858  N    .  GLN  A  386  ?  -13.38773  -23.29963   -3.53401  1.000   32.79951  N   ?  A  ?   361  1
  ATOM    2859  CA   .  GLN  A  386  ?  -14.24933  -22.60065   -4.48284  1.000   38.23239  C   ?  A  ?   361  1
  ATOM    2860  C    .  GLN  A  386  ?  -13.72250  -21.20178   -4.78571  1.000   39.22194  C   ?  A  ?   361  1
  ATOM    2861  O    .  GLN  A  386  ?  -13.80367  -20.73450   -5.92767  1.000   41.63345  O   ?  A  ?   361  1
  ATOM    2862  CB   .  GLN  A  386  ?  -15.68227  -22.52709   -3.95041  1.000   43.69629  C   ?  A  ?   361  1
  ATOM    2863  CG   .  GLN  A  386  ?  -16.62678  -21.73079   -4.84939  1.000   49.96916  C   ?  A  ?   361  1
  ATOM    2864  CD   .  GLN  A  386  ?  -17.94845  -21.39208   -4.18003  1.000   54.71246  C   ?  A  ?   361  1
  ATOM    2865  OE1  .  GLN  A  386  ?  -18.39190  -22.08694   -3.26689  1.000   58.06762  O   ?  A  ?   361  1
  ATOM    2866  NE2  .  GLN  A  386  ?  -18.58225  -20.31383   -4.63221  1.000   55.01294  N   ?  A  ?   361  1
  ATOM    2867  O    .  LYS  A  387  ?  -11.27901  -18.11788   -5.54756  1.000   35.31070  O   ?  A  ?   362  1
  ATOM    2868  N    .  LYS  A  387  ?  -13.16098  -20.52448   -3.78163  1.000   36.92525  N   ?  A  ?   362  1
  ATOM    2869  CA   .  LYS  A  387  ?  -12.75849  -19.13199   -3.95851  1.000   35.60522  C   ?  A  ?   362  1
  ATOM    2870  C    .  LYS  A  387  ?  -11.43186  -19.00482   -4.69985  1.000   34.44779  C   ?  A  ?   362  1
  ATOM    2871  CB   .  LYS  A  387  ?  -12.67050  -18.43359   -2.59965  1.000   37.01347  C   ?  A  ?   362  1
  ATOM    2872  CG   .  LYS  A  387  ?  -12.18977  -16.98336   -2.65405  1.000   37.16723  C   ?  A  ?   362  1
  ATOM    2873  CD   .  LYS  A  387  ?  -13.32371  -16.02039   -2.95982  1.000   37.14966  C   ?  A  ?   362  1
  ATOM    2874  CE   .  LYS  A  387  ?  -13.01842  -14.61557   -2.45098  1.000   38.88875  C   ?  A  ?   362  1
  ATOM    2875  NZ   .  LYS  A  387  ?  -11.96070  -13.91655   -3.23089  1.000   40.60054  N   ?  A  ?   362  1
  ATOM    2876  O    .  PHE  A  388  ?   -7.67825  -20.76123   -6.53786  1.000   35.57364  O   ?  A  ?   363  1
  ATOM    2877  N    .  PHE  A  388  ?  -10.46136  -19.87018   -4.39660  1.000   31.32088  N   ?  A  ?   363  1
  ATOM    2878  CA   .  PHE  A  388  ?   -9.11792  -19.73835   -4.94349  1.000   29.58414  C   ?  A  ?   363  1
  ATOM    2879  C    .  PHE  A  388  ?   -8.70571  -20.87917   -5.86143  1.000   32.54991  C   ?  A  ?   363  1
  ATOM    2880  CB   .  PHE  A  388  ?   -8.09352  -19.61414   -3.80731  1.000   25.33456  C   ?  A  ?   363  1
  ATOM    2881  CG   .  PHE  A  388  ?   -8.27447  -18.38536   -2.96766  1.000   19.11097  C   ?  A  ?   363  1
  ATOM    2882  CD1  .  PHE  A  388  ?   -7.81591  -17.15802   -3.41161  1.000   17.46748  C   ?  A  ?   363  1
  ATOM    2883  CD2  .  PHE  A  388  ?   -8.91141  -18.45464   -1.74064  1.000   14.41554  C   ?  A  ?   363  1
  ATOM    2884  CE1  .  PHE  A  388  ?   -7.98327  -16.02279   -2.64623  1.000   16.70147  C   ?  A  ?   363  1
  ATOM    2885  CE2  .  PHE  A  388  ?   -9.07995  -17.32400   -0.96924  1.000   15.37065  C   ?  A  ?   363  1
  ATOM    2886  CZ   .  PHE  A  388  ?   -8.61604  -16.10510   -1.42311  1.000   15.66670  C   ?  A  ?   363  1
  ATOM    2887  O    .  GLY  A  389  ?   -8.03704  -25.08058   -7.14175  1.000   32.14604  O   ?  A  ?   364  1
  ATOM    2888  N    .  GLY  A  389  ?   -9.45677  -21.97593   -5.89651  1.000   31.70629  N   ?  A  ?   364  1
  ATOM    2889  CA   .  GLY  A  389  ?   -9.20144  -23.03666   -6.84601  1.000   30.32167  C   ?  A  ?   364  1
  ATOM    2890  C    .  GLY  A  389  ?   -8.24898  -24.12006   -6.39236  1.000   30.87339  C   ?  A  ?   364  1
  ATOM    2891  O    .  ALA  A  390  ?   -8.04186  -25.10348   -2.68956  1.000   27.47048  O   ?  A  ?   365  1
  ATOM    2892  N    .  ALA  A  390  ?   -7.66603  -24.00715   -5.20346  1.000   28.59915  N   ?  A  ?   365  1
  ATOM    2893  CA   .  ALA  A  390  ?   -6.73273  -25.00539   -4.70562  1.000   25.58842  C   ?  A  ?   365  1
  ATOM    2894  C    .  ALA  A  390  ?   -7.30345  -25.70047   -3.47752  1.000   26.27570  C   ?  A  ?   365  1
  ATOM    2895  CB   .  ALA  A  390  ?   -5.37776  -24.38041   -4.36546  1.000   25.21927  C   ?  A  ?   365  1
  ATOM    2896  O    .  ASP  A  391  ?   -5.23653  -27.34480   -1.22843  1.000   23.62742  O   ?  A  ?   366  1
  ATOM    2897  N    .  ASP  A  391  ?   -6.95309  -26.97145   -3.32423  1.000   27.41752  N   ?  A  ?   366  1
  ATOM    2898  CA   .  ASP  A  391  ?   -7.40848  -27.76109   -2.19243  1.000   29.68160  C   ?  A  ?   366  1
  ATOM    2899  C    .  ASP  A  391  ?   -6.40495  -27.69256   -1.04612  1.000   22.11589  C   ?  A  ?   366  1
  ATOM    2900  CB   .  ASP  A  391  ?   -7.62514  -29.21916   -2.59961  1.000   37.46652  C   ?  A  ?   366  1
  ATOM    2901  CG   .  ASP  A  391  ?   -8.67684  -29.37462   -3.67681  1.000   42.41184  C   ?  A  ?   366  1
  ATOM    2902  OD1  .  ASP  A  391  ?   -9.86733  -29.14769   -3.37818  1.000   43.92740  O   ?  A  ?   366  1
  ATOM    2903  OD2  .  ASP  A  391  ?   -8.31642  -29.73498   -4.81797  1.000   43.37880  O   ?  A  ?   366  1
  ATOM    2904  O    .  ASN  A  392  ?   -4.09844  -27.00302    2.10372  1.000   17.25575  O   ?  A  ?   367  1
  ATOM    2905  N    .  ASN  A  392  ?   -6.88940  -28.02785    0.15022  1.000   18.75001  N   ?  A  ?   367  1
  ATOM    2906  CA   .  ASN  A  392  ?   -6.05150  -28.18059    1.34115  1.000   20.47405  C   ?  A  ?   367  1
  ATOM    2907  C    .  ASN  A  392  ?   -5.23402  -26.92668    1.63371  1.000   17.52647  C   ?  A  ?   367  1
  ATOM    2908  CB   .  ASN  A  392  ?   -5.13915  -29.39984    1.21649  1.000   24.93451  C   ?  A  ?   367  1
  ATOM    2909  CG   .  ASN  A  392  ?   -5.91137  -30.67266    0.97270  1.000   26.49370  C   ?  A  ?   367  1
  ATOM    2910  OD1  .  ASN  A  392  ?   -6.66572  -31.12781    1.83221  1.000   26.99352  O   ?  A  ?   367  1
  ATOM    2911  ND2  .  ASN  A  392  ?   -5.72690  -31.25936   -0.20224  1.000   27.10831  N   ?  A  ?   367  1
  ATOM    2912  O    .  ILE  A  393  ?   -3.80719  -23.93906    3.58865  1.000   11.67048  O   ?  A  ?   368  1
  ATOM    2913  N    .  ILE  A  393  ?   -5.81990  -25.76104    1.35946  1.000   15.62576  N   ?  A  ?   368  1
  ATOM    2914  CA   .  ILE  A  393  ?   -5.14726  -24.50332    1.66930  1.000   12.31783  C   ?  A  ?   368  1
  ATOM    2915  C    .  ILE  A  393  ?   -4.87271  -24.40408    3.16543  1.000   10.33178  C   ?  A  ?   368  1
  ATOM    2916  CB   .  ILE  A  393  ?   -5.98325  -23.31833    1.14984  1.000   13.89942  C   ?  A  ?   368  1
  ATOM    2917  CG1  .  ILE  A  393  ?   -5.97987  -23.31375   -0.38211  1.000   14.76250  C   ?  A  ?   368  1
  ATOM    2918  CG2  .  ILE  A  393  ?   -5.46457  -22.00147    1.69956  1.000   15.70902  C   ?  A  ?   368  1
  ATOM    2919  CD1  .  ILE  A  393  ?   -6.73587  -22.16260   -1.00163  1.000   14.45049  C   ?  A  ?   368  1
  ATOM    2920  O    .  ILE  A  394  ?   -5.40253  -27.30833    5.40514  1.000   20.78839  O   ?  A  ?   369  1
  ATOM    2921  N    .  ILE  A  394  ?   -5.81243  -24.86073    3.98502  1.000    7.48531  N   ?  A  ?   369  1
  ATOM    2922  CA   .  ILE  A  394  ?   -5.62474  -24.91821    5.42976  1.000    9.61334  C   ?  A  ?   369  1
  ATOM    2923  C    .  ILE  A  394  ?   -4.92730  -26.22739    5.76953  1.000   15.47128  C   ?  A  ?   369  1
  ATOM    2924  CB   .  ILE  A  394  ?   -6.96265  -24.79644    6.17326  1.000   12.40058  C   ?  A  ?   369  1
  ATOM    2925  CG1  .  ILE  A  394  ?   -7.50800  -23.37231    6.05762  1.000   13.18685  C   ?  A  ?   369  1
  ATOM    2926  CG2  .  ILE  A  394  ?   -6.80232  -25.19792    7.63510  1.000   14.00159  C   ?  A  ?   369  1
  ATOM    2927  CD1  .  ILE  A  394  ?   -8.87216  -23.19255    6.68085  1.000    9.92119  C   ?  A  ?   369  1
  ATOM    2928  N    .  ALA  A  395  ?   -3.79191  -26.13288    6.45914  1.000   13.68445  N   ?  A  ?   370  1
  ATOM    2929  CA   .  ALA  A  395  ?   -3.07675  -27.33919    6.85492  1.000   11.77936  C   ?  A  ?   370  1
  ATOM    2930  C    .  ALA  A  395  ?   -3.63754  -27.91935    8.14665  1.000   12.44219  C   ?  A  ?   370  1
  ATOM    2931  O    .  ALA  A  395  ?   -3.68490  -29.14345    8.30953  1.000   13.05140  O   ?  A  ?   370  1
  ATOM    2932  CB   .  ALA  A  395  ?   -1.58394  -27.04295    7.00415  1.000   13.38057  C   ?  A  ?   370  1
  ATOM    2933  N    .  ALA  A  396  ?   -4.07414  -27.06263    9.06734  1.000   12.97410  N   ?  A  ?   371  1
  ATOM    2934  CA   .  ALA  A  396  ?   -4.57850  -27.52453   10.35198  1.000    9.21024  C   ?  A  ?   371  1
  ATOM    2935  C    .  ALA  A  396  ?   -5.44125  -26.43954   10.97833  1.000    8.42733  C   ?  A  ?   371  1
  ATOM    2936  O    .  ALA  A  396  ?   -5.29293  -25.25161   10.68238  1.000    9.72647  O   ?  A  ?   371  1
  ATOM    2937  CB   .  ALA  A  396  ?   -3.43473  -27.91012   11.29614  1.000   11.49243  C   ?  A  ?   371  1
  ATOM    2938  N    .  ALA  A  397  ?   -6.34701  -26.87146   11.85409  1.000    9.49469  N   ?  A  ?   372  1
  ATOM    2939  CA   .  ALA  A  397  ?   -7.20024  -25.96850   12.62386  1.000    8.93363  C   ?  A  ?   372  1
  ATOM    2940  C    .  ALA  A  397  ?   -7.29123  -26.52117   14.03818  1.000    9.11088  C   ?  A  ?   372  1
  ATOM    2941  O    .  ALA  A  397  ?   -7.90360  -27.57008   14.26076  1.000    9.79781  O   ?  A  ?   372  1
  ATOM    2942  CB   .  ALA  A  397  ?   -8.58660  -25.82893   11.99688  1.000    8.21669  C   ?  A  ?   372  1
  ATOM    2943  N    .  MET  A  398  ?   -6.68391  -25.81970   14.98900  1.000   10.77643  N   ?  A  ?   373  1
  ATOM    2944  CA   .  MET  A  398  ?   -6.53489  -26.34200   16.33803  1.000   10.32930  C   ?  A  ?   373  1
  ATOM    2945  C    .  MET  A  398  ?   -6.17853  -25.19060   17.26032  1.000    8.06501  C   ?  A  ?   373  1
  ATOM    2946  O    .  MET  A  398  ?   -5.66641  -24.16074   16.81844  1.000    8.96434  O   ?  A  ?   373  1
  ATOM    2947  CB   .  MET  A  398  ?   -5.45503  -27.42390   16.39110  1.000   10.09698  C   ?  A  ?   373  1
  ATOM    2948  CG   .  MET  A  398  ?   -4.10084  -26.91282   15.92911  1.000   13.75568  C   ?  A  ?   373  1
  ATOM    2949  SD   .  MET  A  398  ?   -2.92628  -28.21347   15.52095  1.000   16.56587  S   ?  A  ?   373  1
  ATOM    2950  CE   .  MET  A  398  ?   -2.82427  -29.06291   17.08811  1.000   10.75988  C   ?  A  ?   373  1
  ATOM    2951  N    .  ASN  A  399  ?   -6.45223  -25.38208   18.55053  1.000    8.30775  N   ?  A  ?   374  1
  ATOM    2952  CA   .  ASN  A  399  ?   -6.15732  -24.37461   19.56712  1.000   11.31403  C   ?  A  ?   374  1
  ATOM    2953  C    .  ASN  A  399  ?   -6.74712  -23.02130   19.18339  1.000    8.38535  C   ?  A  ?   374  1
  ATOM    2954  O    .  ASN  A  399  ?   -6.15767  -21.96839   19.43569  1.000   11.46689  O   ?  A  ?   374  1
  ATOM    2955  CB   .  ASN  A  399  ?   -4.65190  -24.26697   19.80899  1.000   13.78593  C   ?  A  ?   374  1
  ATOM    2956  CG   .  ASN  A  399  ?   -4.04597  -25.57322   20.26468  1.000   11.28135  C   ?  A  ?   374  1
  ATOM    2957  OD1  .  ASN  A  399  ?   -4.62369  -26.28002   21.08869  1.000   12.41382  O   ?  A  ?   374  1
  ATOM    2958  ND2  .  ASN  A  399  ?   -2.88000  -25.90921   19.72072  1.000   11.85642  N   ?  A  ?   374  1
  ATOM    2959  N    .  TYR  A  400  ?   -7.92329  -23.05838   18.55419  1.000    6.77995  N   ?  A  ?   375  1
  ATOM    2960  CA   .  TYR  A  400  ?   -8.61670  -21.85929   18.08771  1.000    7.24678  C   ?  A  ?   375  1
  ATOM    2961  C    .  TYR  A  400  ?   -7.76518  -21.05336   17.11326  1.000    3.04226  C   ?  A  ?   375  1
  ATOM    2962  O    .  TYR  A  400  ?   -7.85515  -19.82588   17.05979  1.000    9.58436  O   ?  A  ?   375  1
  ATOM    2963  CB   .  TYR  A  400  ?   -9.06801  -20.98668   19.26150  1.000    9.45031  C   ?  A  ?   375  1
  ATOM    2964  CG   .  TYR  A  400  ?  -10.21781  -21.58748   20.02814  1.000   15.01038  C   ?  A  ?   375  1
  ATOM    2965  CD1  .  TYR  A  400  ?  -11.52825  -21.29481   19.68534  1.000   17.96801  C   ?  A  ?   375  1
  ATOM    2966  CD2  .  TYR  A  400  ?   -9.99547  -22.46253   21.08035  1.000   20.11317  C   ?  A  ?   375  1
  ATOM    2967  CE1  .  TYR  A  400  ?  -12.58498  -21.84671   20.37431  1.000   21.09903  C   ?  A  ?   375  1
  ATOM    2968  CE2  .  TYR  A  400  ?  -11.04828  -23.01901   21.77510  1.000   23.43398  C   ?  A  ?   375  1
  ATOM    2969  CZ   .  TYR  A  400  ?  -12.34154  -22.70759   21.41964  1.000   24.54847  C   ?  A  ?   375  1
  ATOM    2970  OH   .  TYR  A  400  ?  -13.39538  -23.25939   22.11186  1.000   27.25286  O   ?  A  ?   375  1
  ATOM    2971  N    .  GLN  A  401  ?   -6.94075  -21.74016   16.33041  1.000    3.98611  N   ?  A  ?   376  1
  ATOM    2972  CA   .  GLN  A  401  ?   -6.10731  -21.11210   15.31993  1.000    4.47755  C   ?  A  ?   376  1
  ATOM    2973  C    .  GLN  A  401  ?   -6.22274  -21.90468   14.02868  1.000    5.46362  C   ?  A  ?   376  1
  ATOM    2974  O    .  GLN  A  401  ?   -6.65773  -23.05696   14.02713  1.000    7.59140  O   ?  A  ?   376  1
  ATOM    2975  CB   .  GLN  A  401  ?   -4.64335  -21.03956   15.76641  1.000    7.60167  C   ?  A  ?   376  1
  ATOM    2976  CG   .  GLN  A  401  ?   -4.44364  -20.30695   17.07769  1.000   10.15474  C   ?  A  ?   376  1
  ATOM    2977  CD   .  GLN  A  401  ?   -3.02252  -20.39164   17.58556  1.000   13.80088  C   ?  A  ?   376  1
  ATOM    2978  OE1  .  GLN  A  401  ?   -2.22318  -21.19602   17.10666  1.000    8.75354  O   ?  A  ?   376  1
  ATOM    2979  NE2  .  GLN  A  401  ?   -2.69717  -19.55449   18.56212  1.000   18.48958  N   ?  A  ?   376  1
  ATOM    2980  N    .  VAL  A  402  ?   -5.83594  -21.28327   12.91848  1.000    3.66721  N   ?  A  ?   377  1
  ATOM    2981  CA   .  VAL  A  402  ?   -5.79627  -21.97910   11.63913  1.000    6.08058  C   ?  A  ?   377  1
  ATOM    2982  C    .  VAL  A  402  ?   -4.43606  -21.74023   10.99810  1.000    7.07555  C   ?  A  ?   377  1
  ATOM    2983  O    .  VAL  A  402  ?   -3.92642  -20.61332   10.99848  1.000   10.35719  O   ?  A  ?   377  1
  ATOM    2984  CB   .  VAL  A  402  ?   -6.95780  -21.56858   10.70330  1.000   13.28825  C   ?  A  ?   377  1
  ATOM    2985  CG1  .  VAL  A  402  ?   -7.87114  -20.54330   11.35822  1.000   16.35177  C   ?  A  ?   377  1
  ATOM    2986  CG2  .  VAL  A  402  ?   -6.46913  -21.13238    9.33060  1.000   14.03161  C   ?  A  ?   377  1
  ATOM    2987  N    .  TYR  A  403  ?   -3.83324  -22.81724   10.50303  1.000    3.82579  N   ?  A  ?   378  1
  ATOM    2988  CA   .  TYR  A  403  ?   -2.55001  -22.78711    9.82177  1.000    5.80751  C   ?  A  ?   378  1
  ATOM    2989  C    .  TYR  A  403  ?   -2.79286  -22.98917    8.33789  1.000    6.24520  C   ?  A  ?   378  1
  ATOM    2990  O    .  TYR  A  403  ?   -3.57255  -23.86011    7.94620  1.000    6.16336  O   ?  A  ?   378  1
  ATOM    2991  CB   .  TYR  A  403  ?   -1.61634  -23.89772   10.30723  1.000    6.25372  C   ?  A  ?   378  1
  ATOM    2992  CG   .  TYR  A  403  ?   -1.31125  -23.96027   11.78414  1.000    5.69374  C   ?  A  ?   378  1
  ATOM    2993  CD1  .  TYR  A  403  ?   -0.02998  -23.70204   12.25101  1.000    7.01831  C   ?  A  ?   378  1
  ATOM    2994  CD2  .  TYR  A  403  ?   -2.27973  -24.33603   12.70405  1.000    8.58285  C   ?  A  ?   378  1
  ATOM    2995  CE1  .  TYR  A  403  ?    0.27193  -23.78488   13.59416  1.000    6.74521  C   ?  A  ?   378  1
  ATOM    2996  CE2  .  TYR  A  403  ?   -1.98842  -24.41858   14.05140  1.000    7.48430  C   ?  A  ?   378  1
  ATOM    2997  CZ   .  TYR  A  403  ?   -0.70742  -24.14470   14.48974  1.000    9.01574  C   ?  A  ?   378  1
  ATOM    2998  OH   .  TYR  A  403  ?   -0.40181  -24.22462   15.82882  1.000    9.72351  O   ?  A  ?   378  1
  ATOM    2999  N    .  PHE  A  404  ?   -2.11367  -22.20472    7.51508  1.000    7.37757  N   ?  A  ?   379  1
  ATOM    3000  CA   .  PHE  A  404  ?   -2.20461  -22.36470    6.07398  1.000    9.19542  C   ?  A  ?   379  1
  ATOM    3001  C    .  PHE  A  404  ?   -1.00324  -23.15050    5.57053  1.000    9.78065  C   ?  A  ?   379  1
  ATOM    3002  O    .  PHE  A  404  ?    0.11988  -22.96393    6.04609  1.000   10.44544  O   ?  A  ?   379  1
  ATOM    3003  CB   .  PHE  A  404  ?   -2.30676  -21.00498    5.38371  1.000    9.68296  C   ?  A  ?   379  1
  ATOM    3004  CG   .  PHE  A  404  ?   -3.57494  -20.27014    5.71174  1.000    9.80140  C   ?  A  ?   379  1
  ATOM    3005  CD1  .  PHE  A  404  ?   -4.77868  -20.67271    5.15891  1.000    9.39878  C   ?  A  ?   379  1
  ATOM    3006  CD2  .  PHE  A  404  ?   -3.57066  -19.19741    6.58923  1.000    9.05136  C   ?  A  ?   379  1
  ATOM    3007  CE1  .  PHE  A  404  ?   -5.95303  -20.01258    5.45788  1.000   11.07374  C   ?  A  ?   379  1
  ATOM    3008  CE2  .  PHE  A  404  ?   -4.74458  -18.53359    6.89529  1.000    9.75038  C   ?  A  ?   379  1
  ATOM    3009  CZ   .  PHE  A  404  ?   -5.93711  -18.94134    6.32713  1.000   11.98518  C   ?  A  ?   379  1
  ATOM    3010  O    .  ASP  A  405  ?    0.26430  -23.74126    2.04851  1.000   16.67587  O   ?  A  ?   380  1
  ATOM    3011  N    .  ASP  A  405  ?   -1.25409  -24.05005    4.62501  1.000   10.58257  N   ?  A  ?   380  1
  ATOM    3012  CA   .  ASP  A  405  ?   -0.21085  -24.91420    4.08764  1.000   14.27094  C   ?  A  ?   380  1
  ATOM    3013  C    .  ASP  A  405  ?    0.67310  -24.08877    3.16147  1.000   17.00590  C   ?  A  ?   380  1
  ATOM    3014  CB   .  ASP  A  405  ?   -0.83292  -26.10042    3.35786  1.000   15.26362  C   ?  A  ?   380  1
  ATOM    3015  CG   .  ASP  A  405  ?    0.11601  -27.27556    3.23963  1.000   18.43513  C   ?  A  ?   380  1
  ATOM    3016  OD1  .  ASP  A  405  ?    1.33832  -27.04886    3.13763  1.000   24.02623  O   ?  A  ?   380  1
  ATOM    3017  OD2  .  ASP  A  405  ?   -0.36187  -28.42800    3.25185  1.000   18.45290  O   ?  A  ?   380  1
  ATOM    3018  N    .  ARG  A  406  ?    1.88438  -23.76546    3.62397  1.000   18.77706  N   ?  A  ?   381  1
  ATOM    3019  CA   .  ARG  A  406  ?    2.79499  -22.96713    2.81017  1.000   20.23086  C   ?  A  ?   381  1
  ATOM    3020  C    .  ARG  A  406  ?    3.14292  -23.66884    1.50436  1.000   18.93724  C   ?  A  ?   381  1
  ATOM    3021  O    .  ARG  A  406  ?    3.39995  -23.00493    0.49316  1.000   18.14080  O   ?  A  ?   381  1
  ATOM    3022  CB   .  ARG  A  406  ?    4.06819  -22.65075    3.59567  1.000   22.31318  C   ?  A  ?   381  1
  ATOM    3023  CG   .  ARG  A  406  ?    3.84469  -21.84920    4.86967  1.000   25.64423  C   ?  A  ?   381  1
  ATOM    3024  CD   .  ARG  A  406  ?    3.12368  -20.53970    4.59796  1.000   25.55953  C   ?  A  ?   381  1
  ATOM    3025  NE   .  ARG  A  406  ?    3.20053  -19.63182    5.73987  1.000   23.22343  N   ?  A  ?   381  1
  ATOM    3026  CZ   .  ARG  A  406  ?    2.36534  -19.65083    6.77451  1.000   21.76142  C   ?  A  ?   381  1
  ATOM    3027  NH1  .  ARG  A  406  ?    2.51889  -18.78281    7.76493  1.000   23.41472  N   ?  A  ?   381  1
  ATOM    3028  NH2  .  ARG  A  406  ?    1.37837  -20.53566    6.82364  1.000   17.35003  N   ?  A  ?   381  1
  ATOM    3029  N    .  LYS  A  407  ?    3.15404  -25.00393    1.50377  1.000   17.53964  N   ?  A  ?   382  1
  ATOM    3030  CA   .  LYS  A  407  ?    3.43932  -25.73983    0.27630  1.000   21.03421  C   ?  A  ?   382  1
  ATOM    3031  C    .  LYS  A  407  ?    2.34050  -25.53408   -0.75810  1.000   19.34842  C   ?  A  ?   382  1
  ATOM    3032  O    .  LYS  A  407  ?    2.62378  -25.37296   -1.95065  1.000   21.35358  O   ?  A  ?   382  1
  ATOM    3033  CB   .  LYS  A  407  ?    3.61360  -27.22699    0.58480  1.000   22.43230  C   ?  A  ?   382  1
  ATOM    3034  N    .  VAL  A  408  ?    1.08105  -25.53254   -0.31980  1.000   19.94064  N   ?  A  ?   383  1
  ATOM    3035  CA   .  VAL  A  408  ?   -0.02850  -25.35355   -1.24907  1.000   22.27120  C   ?  A  ?   383  1
  ATOM    3036  C    .  VAL  A  408  ?   -0.06161  -23.92568   -1.77899  1.000   24.19642  C   ?  A  ?   383  1
  ATOM    3037  O    .  VAL  A  408  ?   -0.34974  -23.69536   -2.95892  1.000   25.71498  O   ?  A  ?   383  1
  ATOM    3038  CB   .  VAL  A  408  ?   -1.35492  -25.73803   -0.57051  1.000   22.52865  C   ?  A  ?   383  1
  ATOM    3039  CG1  .  VAL  A  408  ?   -2.51587  -25.55643   -1.53443  1.000   23.58904  C   ?  A  ?   383  1
  ATOM    3040  CG2  .  VAL  A  408  ?   -1.29192  -27.16990   -0.07263  1.000   21.31568  C   ?  A  ?   383  1
  ATOM    3041  N    .  LEU  A  409  ?    0.23536  -22.94657   -0.92229  1.000   24.04352  N   ?  A  ?   384  1
  ATOM    3042  CA   .  LEU  A  409  ?    0.18491  -21.54872   -1.34313  1.000   21.86381  C   ?  A  ?   384  1
  ATOM    3043  C    .  LEU  A  409  ?    1.21884  -21.25863   -2.42563  1.000   19.89588  C   ?  A  ?   384  1
  ATOM    3044  O    .  LEU  A  409  ?    0.91658  -20.60478   -3.43064  1.000   18.24720  O   ?  A  ?   384  1
  ATOM    3045  CB   .  LEU  A  409  ?    0.39127  -20.63268   -0.13627  1.000   19.61565  C   ?  A  ?   384  1
  ATOM    3046  CG   .  LEU  A  409  ?   -0.68951  -20.71866    0.94325  1.000   17.08493  C   ?  A  ?   384  1
  ATOM    3047  CD1  .  LEU  A  409  ?   -0.41924  -19.71850    2.05602  1.000   16.94105  C   ?  A  ?   384  1
  ATOM    3048  CD2  .  LEU  A  409  ?   -2.06798  -20.50559    0.34044  1.000   16.77435  C   ?  A  ?   384  1
  ATOM    3049  O    .  ALA  A  410  ?    3.26988  -21.57909   -5.61527  1.000   27.78752  O   ?  A  ?   385  1
  ATOM    3050  N    .  ALA  A  410  ?    2.44703  -21.74518   -2.23949  1.000   23.37083  N   ?  A  ?   385  1
  ATOM    3051  CA   .  ALA  A  410  ?    3.49697  -21.50513   -3.22426  1.000   24.58922  C   ?  A  ?   385  1
  ATOM    3052  C    .  ALA  A  410  ?    3.18109  -22.19395   -4.54617  1.000   25.32743  C   ?  A  ?   385  1
  ATOM    3053  CB   .  ALA  A  410  ?    4.84495  -21.97672   -2.67861  1.000   25.04463  C   ?  A  ?   385  1
  ATOM    3054  O    .  ASP  A  411  ?    1.23912  -23.75174   -7.68154  1.000   30.34269  O   ?  A  ?   386  1
  ATOM    3055  N    .  ASP  A  411  ?    2.80565  -23.47337   -4.49248  1.000   23.78089  N   ?  A  ?   386  1
  ATOM    3056  CA   .  ASP  A  411  ?    2.53340  -24.21303   -5.72007  1.000   27.53434  C   ?  A  ?   386  1
  ATOM    3057  C    .  ASP  A  411  ?    1.31276  -23.66712   -6.45064  1.000   29.06784  C   ?  A  ?   386  1
  ATOM    3058  CB   .  ASP  A  411  ?    2.35314  -25.69833   -5.40619  1.000   32.07186  C   ?  A  ?   386  1
  ATOM    3059  CG   .  ASP  A  411  ?    3.59572  -26.31883   -4.79002  1.000   36.78811  C   ?  A  ?   386  1
  ATOM    3060  OD1  .  ASP  A  411  ?    4.69629  -25.74981   -4.95375  1.000   36.74163  O   ?  A  ?   386  1
  ATOM    3061  OD2  .  ASP  A  411  ?    3.47318  -27.37890   -4.14273  1.000   39.10745  O   ?  A  ?   386  1
  ATOM    3062  O    .  SER  A  412  ?   -1.68096  -20.42980   -7.08332  1.000   31.70091  O   ?  A  ?   387  1
  ATOM    3063  N    .  SER  A  412  ?    0.35618  -23.09762   -5.72050  1.000   31.23915  N   ?  A  ?   387  1
  ATOM    3064  CA   .  SER  A  412  ?   -0.84385  -22.52278   -6.31530  1.000   30.44000  C   ?  A  ?   387  1
  ATOM    3065  C    .  SER  A  412  ?   -0.72685  -21.02650   -6.57376  1.000   29.96379  C   ?  A  ?   387  1
  ATOM    3066  CB   .  SER  A  412  ?   -2.05888  -22.79027   -5.42267  1.000   27.96206  C   ?  A  ?   387  1
  ATOM    3067  OG   .  SER  A  412  ?   -2.33323  -24.17567   -5.34286  1.000   27.51948  O   ?  A  ?   387  1
  ATOM    3068  O    .  LYS  A  413  ?   -0.88492  -17.14489   -6.27071  1.000   21.75955  O   ?  A  ?   388  1
  ATOM    3069  N    .  LYS  A  413  ?    0.40796  -20.41148   -6.22939  1.000   28.81582  N   ?  A  ?   388  1
  ATOM    3070  CA   .  LYS  A  413  ?    0.65296  -18.98772   -6.47752  1.000   25.78333  C   ?  A  ?   388  1
  ATOM    3071  C    .  LYS  A  413  ?   -0.34194  -18.10641   -5.72327  1.000   23.99556  C   ?  A  ?   388  1
  ATOM    3072  CB   .  LYS  A  413  ?    0.62012  -18.67097   -7.97471  1.000   26.49116  C   ?  A  ?   388  1
  ATOM    3073  CG   .  LYS  A  413  ?    1.41859  -19.62189   -8.84585  1.000   29.53598  C   ?  A  ?   388  1
  ATOM    3074  CD   .  LYS  A  413  ?    2.83647  -19.12891   -9.06819  1.000   30.34292  C   ?  A  ?   388  1
  ATOM    3075  CE   .  LYS  A  413  ?    3.40629  -19.74672  -10.32967  1.000   30.55229  C   ?  A  ?   388  1
  ATOM    3076  NZ   .  LYS  A  413  ?    2.39690  -19.68828  -11.42486  1.000   30.20062  N   ?  A  ?   388  1
  ATOM    3077  O    .  LEU  A  414  ?    0.15645  -17.44303   -1.95782  1.000   21.60653  O   ?  A  ?   389  1
  ATOM    3078  N    .  LEU  A  414  ?   -0.57823  -18.42919   -4.45483  1.000   24.90716  N   ?  A  ?   389  1
  ATOM    3079  CA   .  LEU  A  414  ?   -1.54685  -17.72434   -3.62664  1.000   23.24591  C   ?  A  ?   389  1
  ATOM    3080  C    .  LEU  A  414  ?   -0.83550  -16.96319   -2.51604  1.000   21.56893  C   ?  A  ?   389  1
  ATOM    3081  CB   .  LEU  A  414  ?   -2.56120  -18.70099   -3.02047  1.000   24.41826  C   ?  A  ?   389  1
  ATOM    3082  CG   .  LEU  A  414  ?   -3.42219  -19.50022   -4.00171  1.000   24.96439  C   ?  A  ?   389  1
  ATOM    3083  CD1  .  LEU  A  414  ?   -4.11915  -20.65002   -3.29587  1.000   25.55665  C   ?  A  ?   389  1
  ATOM    3084  CD2  .  LEU  A  414  ?   -4.43757  -18.59961   -4.67943  1.000   26.16867  C   ?  A  ?   389  1
  ATOM    3085  O    .  GLU  A  415  ?   -2.53004  -15.74388    0.33614  1.000   18.17256  O   ?  A  ?   390  1
  ATOM    3086  N    .  GLU  A  415  ?   -1.34838  -15.77707   -2.19817  1.000   20.23496  N   ?  A  ?   390  1
  ATOM    3087  CA   .  GLU  A  415  ?   -0.78503  -14.97194   -1.12537  1.000   19.70081  C   ?  A  ?   390  1
  ATOM    3088  C    .  GLU  A  415  ?   -1.34779  -15.40964    0.21877  1.000   18.77208  C   ?  A  ?   390  1
  ATOM    3089  CB   .  GLU  A  415  ?   -1.08039  -13.48978   -1.35029  1.000   24.83141  C   ?  A  ?   390  1
  ATOM    3090  CG   .  GLU  A  415  ?   -0.29655  -12.85080   -2.48096  1.000   31.84230  C   ?  A  ?   390  1
  ATOM    3091  CD   .  GLU  A  415  ?    1.17634  -12.68921   -2.15552  1.000   39.42507  C   ?  A  ?   390  1
  ATOM    3092  OE1  .  GLU  A  415  ?    1.98927  -12.62456   -3.10121  1.000   42.76266  O   ?  A  ?   390  1
  ATOM    3093  OE2  .  GLU  A  415  ?    1.52262  -12.62521   -0.95649  1.000   41.59621  O   ?  A  ?   390  1
  ATOM    3094  O    .  LEU  A  416  ?   -2.99177  -15.07585    3.67142  1.000   22.22938  O   ?  A  ?   391  1
  ATOM    3095  N    .  LEU  A  416  ?   -0.48661  -15.41260    1.23708  1.000   18.53863  N   ?  A  ?   391  1
  ATOM    3096  CA   .  LEU  A  416  ?   -0.95113  -15.71825    2.58416  1.000   17.73246  C   ?  A  ?   391  1
  ATOM    3097  C    .  LEU  A  416  ?   -1.99215  -14.70636    3.04576  1.000   20.56801  C   ?  A  ?   391  1
  ATOM    3098  CB   .  LEU  A  416  ?    0.23311  -15.75886    3.54961  1.000   14.76367  C   ?  A  ?   391  1
  ATOM    3099  CG   .  LEU  A  416  ?   -0.09399  -15.85242    5.04083  1.000   13.84604  C   ?  A  ?   391  1
  ATOM    3100  CD1  .  LEU  A  416  ?   -0.86772  -17.12441    5.35961  1.000   14.21648  C   ?  A  ?   391  1
  ATOM    3101  CD2  .  LEU  A  416  ?    1.17716  -15.77263    5.86413  1.000   13.63166  C   ?  A  ?   391  1
  ATOM    3102  O    .  ASP  A  417  ?   -5.09750  -12.32185    3.22710  1.000   20.56612  O   ?  A  ?   392  1
  ATOM    3103  N    .  ASP  A  417  ?   -1.79187  -13.42751    2.72004  1.000   20.86953  N   ?  A  ?   392  1
  ATOM    3104  CA   .  ASP  A  417  ?   -2.70243  -12.39626    3.20667  1.000   19.84992  C   ?  A  ?   392  1
  ATOM    3105  C    .  ASP  A  417  ?   -4.07675  -12.49859    2.55319  1.000   21.38004  C   ?  A  ?   392  1
  ATOM    3106  CB   .  ASP  A  417  ?   -2.09750  -11.01249    2.98246  1.000   20.87505  C   ?  A  ?   392  1
  ATOM    3107  CG   .  ASP  A  417  ?   -0.94641  -10.72197    3.92540  1.000   22.93059  C   ?  A  ?   392  1
  ATOM    3108  OD1  .  ASP  A  417  ?   -0.81839  -11.42334    4.95149  1.000   23.35746  O   ?  A  ?   392  1
  ATOM    3109  OD2  .  ASP  A  417  ?   -0.17015   -9.78682    3.64318  1.000   26.12126  O   ?  A  ?   392  1
  ATOM    3110  O    .  ASP  A  418  ?   -7.34027  -13.95002    1.61875  1.000   23.13611  O   ?  A  ?   393  1
  ATOM    3111  N    .  ASP  A  418  ?   -4.13016  -12.77020    1.24644  1.000   22.54101  N   ?  A  ?   393  1
  ATOM    3112  CA   .  ASP  A  418  ?   -5.41950  -12.93756    0.57924  1.000   24.63713  C   ?  A  ?   393  1
  ATOM    3113  C    .  ASP  A  418  ?   -6.18942  -14.09376    1.19007  1.000   21.24424  C   ?  A  ?   393  1
  ATOM    3114  CB   .  ASP  A  418  ?   -5.21846  -13.18874   -0.91493  1.000   28.04680  C   ?  A  ?   393  1
  ATOM    3115  CG   .  ASP  A  418  ?   -4.51708  -12.05425   -1.60443  1.000   29.35878  C   ?  A  ?   393  1
  ATOM    3116  OD1  .  ASP  A  418  ?   -3.99287  -12.26971   -2.71620  1.000   28.55784  O   ?  A  ?   393  1
  ATOM    3117  OD2  .  ASP  A  418  ?   -4.48328  -10.94596   -1.03227  1.000   34.03336  O   ?  A  ?   393  1
  ATOM    3118  O    .  VAL  A  419  ?   -7.55589  -16.78551    3.68404  1.000   17.84415  O   ?  A  ?   394  1
  ATOM    3119  N    .  VAL  A  419  ?   -5.54857  -15.25801    1.22598  1.000   17.61745  N   ?  A  ?   394  1
  ATOM    3120  CA   .  VAL  A  419  ?   -6.14706  -16.46745    1.76170  1.000   15.81322  C   ?  A  ?   394  1
  ATOM    3121  C    .  VAL  A  419  ?   -6.52218  -16.28073    3.22979  1.000   13.03371  C   ?  A  ?   394  1
  ATOM    3122  CB   .  VAL  A  419  ?   -5.15296  -17.62410    1.50824  1.000   22.84471  C   ?  A  ?   394  1
  ATOM    3123  CG1  .  VAL  A  419  ?   -4.70491  -18.29643    2.78126  1.000   23.25994  C   ?  A  ?   394  1
  ATOM    3124  CG2  .  VAL  A  419  ?   -5.69788  -18.60067    0.47107  1.000   25.69845  C   ?  A  ?   394  1
  ATOM    3125  O    .  ARG  A  420  ?   -8.04872  -14.43366    6.42310  1.000    8.26384  O   ?  A  ?   395  1
  ATOM    3126  N    .  ARG  A  420  ?   -5.73251  -15.50431    3.97803  1.000   10.99886  N   ?  A  ?   395  1
  ATOM    3127  CA   .  ARG  A  420  ?   -6.04900  -15.24982    5.38097  1.000    8.12490  C   ?  A  ?   395  1
  ATOM    3128  C    .  ARG  A  420  ?   -7.20474  -14.26806    5.53388  1.000   10.32780  C   ?  A  ?   395  1
  ATOM    3129  CB   .  ARG  A  420  ?   -4.81305  -14.72839    6.11457  1.000    8.47172  C   ?  A  ?   395  1
  ATOM    3130  CG   .  ARG  A  420  ?   -5.09299  -14.17552    7.49893  1.000    9.87258  C   ?  A  ?   395  1
  ATOM    3131  CD   .  ARG  A  420  ?   -3.84627  -14.21419    8.35790  1.000    7.57350  C   ?  A  ?   395  1
  ATOM    3132  NE   .  ARG  A  420  ?   -2.72919  -13.49882    7.74870  1.000   10.70791  N   ?  A  ?   395  1
  ATOM    3133  CZ   .  ARG  A  420  ?   -1.48356  -13.54279    8.20802  1.000   12.11183  C   ?  A  ?   395  1
  ATOM    3134  NH1  .  ARG  A  420  ?   -1.19895  -14.26964    9.28062  1.000   10.42398  N   ?  A  ?   395  1
  ATOM    3135  NH2  .  ARG  A  420  ?   -0.52316  -12.86216    7.59790  1.000   13.38424  N   ?  A  ?   395  1
  ATOM    3136  O    .  ASP  A  421  ?  -10.67067  -12.52415    5.18752  1.000   11.20982  O   ?  A  ?   396  1
  ATOM    3137  N    .  ASP  A  421  ?   -7.25875  -13.23994    4.68316  1.000   11.87258  N   ?  A  ?   396  1
  ATOM    3138  CA   .  ASP  A  421  ?   -8.31813  -12.24399    4.80747  1.000   13.76532  C   ?  A  ?   396  1
  ATOM    3139  C    .  ASP  A  421  ?   -9.68465  -12.85231    4.51720  1.000   13.60270  C   ?  A  ?   396  1
  ATOM    3140  CB   .  ASP  A  421  ?   -8.03819  -11.05848    3.88378  1.000   15.16897  C   ?  A  ?   396  1
  ATOM    3141  CG   .  ASP  A  421  ?   -6.85975  -10.22248    4.35116  1.000   20.12506  C   ?  A  ?   396  1
  ATOM    3142  OD1  .  ASP  A  421  ?   -6.39335  -10.42903    5.49204  1.000   23.28078  O   ?  A  ?   396  1
  ATOM    3143  OD2  .  ASP  A  421  ?   -6.39916   -9.35383    3.58210  1.000   22.47563  O   ?  A  ?   396  1
  ATOM    3144  N    .  TYR  A  422  ?   -9.75675  -13.75590    3.53802  1.000   13.35617  N   ?  A  ?   397  1
  ATOM    3145  CA   .  TYR  A  422  ?  -11.01946  -14.41386    3.22277  1.000   14.34565  C   ?  A  ?   397  1
  ATOM    3146  C    .  TYR  A  422  ?  -11.51769  -15.24368    4.40059  1.000   14.66438  C   ?  A  ?   397  1
  ATOM    3147  O    .  TYR  A  422  ?  -12.68167  -15.13290    4.80356  1.000   14.05765  O   ?  A  ?   397  1
  ATOM    3148  CB   .  TYR  A  422  ?  -10.85410  -15.28529    1.97774  1.000   16.92703  C   ?  A  ?   397  1
  ATOM    3149  CG   .  TYR  A  422  ?  -12.09228  -16.07219    1.62676  1.000   18.39037  C   ?  A  ?   397  1
  ATOM    3150  CD1  .  TYR  A  422  ?  -12.23405  -17.39319    2.02569  1.000   19.54347  C   ?  A  ?   397  1
  ATOM    3151  CD2  .  TYR  A  422  ?  -13.12502  -15.49080    0.90856  1.000   20.56595  C   ?  A  ?   397  1
  ATOM    3152  CE1  .  TYR  A  422  ?  -13.36321  -18.11393    1.71473  1.000   21.71604  C   ?  A  ?   397  1
  ATOM    3153  CE2  .  TYR  A  422  ?  -14.26018  -16.20514    0.59113  1.000   22.24019  C   ?  A  ?   397  1
  ATOM    3154  CZ   .  TYR  A  422  ?  -14.37350  -17.51635    0.99744  1.000   22.66771  C   ?  A  ?   397  1
  ATOM    3155  OH   .  TYR  A  422  ?  -15.50212  -18.23711    0.68729  1.000   25.48236  O   ?  A  ?   397  1
  ATOM    3156  N    .  VAL  A  423  ?  -10.64530  -16.08499    4.96433  1.000   15.08687  N   ?  A  ?   398  1
  ATOM    3157  CA   .  VAL  A  423  ?  -11.04171  -16.94119    6.08029  1.000   12.34976  C   ?  A  ?   398  1
  ATOM    3158  C    .  VAL  A  423  ?  -11.53250  -16.10188    7.25134  1.000   11.26905  C   ?  A  ?   398  1
  ATOM    3159  O    .  VAL  A  423  ?  -12.53350  -16.43504    7.89660  1.000   12.60421  O   ?  A  ?   398  1
  ATOM    3160  CB   .  VAL  A  423  ?   -9.87597  -17.85992    6.49262  1.000    9.01280  C   ?  A  ?   398  1
  ATOM    3161  CG1  .  VAL  A  423  ?  -10.24112  -18.66151    7.73148  1.000    9.22109  C   ?  A  ?   398  1
  ATOM    3162  CG2  .  VAL  A  423  ?   -9.50705  -18.79035    5.35295  1.000    6.21152  C   ?  A  ?   398  1
  ATOM    3163  N    .  MET  A  424  ?  -10.84428  -14.99666    7.54021  1.000   11.81502  N   ?  A  ?   399  1
  ATOM    3164  CA   .  MET  A  424  ?  -11.26452  -14.14735    8.64804  1.000   13.17678  C   ?  A  ?   399  1
  ATOM    3165  C    .  MET  A  424  ?  -12.61764  -13.50576    8.36803  1.000   13.93913  C   ?  A  ?   399  1
  ATOM    3166  O    .  MET  A  424  ?  -13.45725  -13.40283    9.26878  1.000   13.84332  O   ?  A  ?   399  1
  ATOM    3167  CB   .  MET  A  424  ?  -10.19998  -13.08813    8.93046  1.000   14.89681  C   ?  A  ?   399  1
  ATOM    3168  CG   .  MET  A  424  ?   -8.90089  -13.67381    9.45784  1.000   13.98697  C   ?  A  ?   399  1
  ATOM    3169  SD   .  MET  A  424  ?   -7.77827  -12.44031   10.13456  1.000   15.71048  S   ?  A  ?   399  1
  ATOM    3170  CE   .  MET  A  424  ?   -7.43289  -11.46714    8.67478  1.000   14.24169  C   ?  A  ?   399  1
  ATOM    3171  N    .  THR  A  425  ?  -12.85433  -13.08545    7.12308  1.000   15.12400  N   ?  A  ?   400  1
  ATOM    3172  CA   .  THR  A  425  ?  -14.15602  -12.52894    6.76414  1.000   17.30522  C   ?  A  ?   400  1
  ATOM    3173  C    .  THR  A  425  ?  -15.26239  -13.56746    6.92111  1.000   18.20035  C   ?  A  ?   400  1
  ATOM    3174  O    .  THR  A  425  ?  -16.34968  -13.25863    7.42363  1.000   20.78112  O   ?  A  ?   400  1
  ATOM    3175  CB   .  THR  A  425  ?  -14.11236  -11.99051    5.33242  1.000   18.02935  C   ?  A  ?   400  1
  ATOM    3176  OG1  .  THR  A  425  ?  -13.18901  -10.89621    5.26331  1.000   19.61745  O   ?  A  ?   400  1
  ATOM    3177  CG2  .  THR  A  425  ?  -15.48945  -11.51883    4.88308  1.000   16.04969  C   ?  A  ?   400  1
  ATOM    3178  N    .  GLU  A  426  ?  -14.99750  -14.81012    6.51132  1.000   18.46351  N   ?  A  ?   401  1
  ATOM    3179  CA   .  GLU  A  426  ?  -15.98679  -15.87104    6.67193  1.000   14.82082  C   ?  A  ?   401  1
  ATOM    3180  C    .  GLU  A  426  ?  -16.23048  -16.18853    8.14109  1.000   13.40243  C   ?  A  ?   401  1
  ATOM    3181  O    .  GLU  A  426  ?  -17.36350  -16.48281    8.53749  1.000   12.48244  O   ?  A  ?   401  1
  ATOM    3182  CB   .  GLU  A  426  ?  -15.53701  -17.12659    5.92736  1.000   15.09325  C   ?  A  ?   401  1
  ATOM    3183  CG   .  GLU  A  426  ?  -15.50905  -16.96567    4.42254  1.000   18.20347  C   ?  A  ?   401  1
  ATOM    3184  CD   .  GLU  A  426  ?  -16.87030  -16.62262    3.85495  1.000   24.56937  C   ?  A  ?   401  1
  ATOM    3185  OE1  .  GLU  A  426  ?  -17.85378  -17.30515    4.21059  1.000   25.97158  O   ?  A  ?   401  1
  ATOM    3186  OE2  .  GLU  A  426  ?  -16.95926  -15.66339    3.06025  1.000   27.94003  O   ?  A  ?   401  1
  ATOM    3187  N    .  LEU  A  427  ?  -15.18191  -16.13611    8.96465  1.000   11.07456  N   ?  A  ?   402  1
  ATOM    3188  CA   .  LEU  A  427  ?  -15.33750  -16.51357   10.36457  1.000   10.36002  C   ?  A  ?   402  1
  ATOM    3189  C    .  LEU  A  427  ?  -16.09769  -15.45966   11.15956  1.000   12.37977  C   ?  A  ?   402  1
  ATOM    3190  O    .  LEU  A  427  ?  -16.72756  -15.78992   12.16999  1.000   14.25125  O   ?  A  ?   402  1
  ATOM    3191  CB   .  LEU  A  427  ?  -13.97059  -16.77955   10.99076  1.000   10.47963  C   ?  A  ?   402  1
  ATOM    3192  CG   .  LEU  A  427  ?  -13.36673  -18.13528   10.62470  1.000    9.36884  C   ?  A  ?   402  1
  ATOM    3193  CD1  .  LEU  A  427  ?  -11.91205  -18.21873   11.04434  1.000    9.81869  C   ?  A  ?   402  1
  ATOM    3194  CD2  .  LEU  A  427  ?  -14.16775  -19.25480   11.26608  1.000   12.70377  C   ?  A  ?   402  1
  ATOM    3195  N    .  LYS  A  428  ?  -16.05688  -14.19663   10.72603  1.000   12.84830  N   ?  A  ?   403  1
  ATOM    3196  CA   .  LYS  A  428  ?  -16.83080  -13.15600   11.39478  1.000   18.20264  C   ?  A  ?   403  1
  ATOM    3197  C    .  LYS  A  428  ?  -18.32808  -13.41873   11.31473  1.000   22.83003  C   ?  A  ?   403  1
  ATOM    3198  O    .  LYS  A  428  ?  -19.08054  -12.93680   12.16850  1.000   23.71435  O   ?  A  ?   403  1
  ATOM    3199  CB   .  LYS  A  428  ?  -16.51586  -11.78711   10.78918  1.000   18.55490  C   ?  A  ?   403  1
  ATOM    3200  CG   .  LYS  A  428  ?  -15.10740  -11.28356   11.03713  1.000   18.92994  C   ?  A  ?   403  1
  ATOM    3201  CD   .  LYS  A  428  ?  -14.96100   -9.85853   10.53129  1.000   20.09495  C   ?  A  ?   403  1
  ATOM    3202  CE   .  LYS  A  428  ?  -13.61310   -9.26643   10.89271  1.000   21.71504  C   ?  A  ?   403  1
  ATOM    3203  NZ   .  LYS  A  428  ?  -12.49032  -10.12986   10.44992  1.000   25.14931  N   ?  A  ?   403  1
  ATOM    3204  N    A  LYS  A  429  ?  -18.77178  -14.17068   10.30733  0.540   21.77826  N   ?  A  ?   404  1
  ATOM    3205  CA   A  LYS  A  429  ?  -20.17558  -14.51692   10.13858  0.540   20.97747  C   ?  A  ?   404  1
  ATOM    3206  C    A  LYS  A  429  ?  -20.64588  -15.59212   11.10768  0.540   20.51779  C   ?  A  ?   404  1
  ATOM    3207  O    A  LYS  A  429  ?  -21.85706  -15.78338   11.24948  0.540   21.48938  O   ?  A  ?   404  1
  ATOM    3208  CB   A  LYS  A  429  ?  -20.42527  -14.99354    8.70551  0.540   20.17102  C   ?  A  ?   404  1
  ATOM    3209  CG   A  LYS  A  429  ?  -20.22965  -13.93191    7.63499  0.540   20.01777  C   ?  A  ?   404  1
  ATOM    3210  CD   A  LYS  A  429  ?  -19.93453  -14.56344    6.27679  0.540   20.24135  C   ?  A  ?   404  1
  ATOM    3211  CE   A  LYS  A  429  ?  -20.71009  -15.86009    6.08003  0.540   22.37141  C   ?  A  ?   404  1
  ATOM    3212  NZ   A  LYS  A  429  ?  -20.50047  -16.47494    4.73782  0.540   25.51794  N   ?  A  ?   404  1
  ATOM    3213  N    B  LYS  A  429  ?  -18.77811  -14.17510   10.31582  0.460   21.78108  N   ?  A  ?   404  1
  ATOM    3214  CA   B  LYS  A  429  ?  -20.19186  -14.49241   10.17536  0.460   20.96482  C   ?  A  ?   404  1
  ATOM    3215  C    B  LYS  A  429  ?  -20.65180  -15.59088   11.12092  0.460   20.51945  C   ?  A  ?   404  1
  ATOM    3216  O    B  LYS  A  429  ?  -21.86117  -15.79446   11.26259  0.460   21.42924  O   ?  A  ?   404  1
  ATOM    3217  CB   B  LYS  A  429  ?  -20.48899  -14.90396    8.73369  0.460   20.29118  C   ?  A  ?   404  1
  ATOM    3218  CG   B  LYS  A  429  ?  -20.13087  -13.83520    7.72820  0.460   20.00717  C   ?  A  ?   404  1
  ATOM    3219  CD   B  LYS  A  429  ?  -20.10485  -14.37222    6.31422  0.460   20.26448  C   ?  A  ?   404  1
  ATOM    3220  CE   B  LYS  A  429  ?  -19.55198  -13.31725    5.37430  0.460   18.50767  C   ?  A  ?   404  1
  ATOM    3221  NZ   B  LYS  A  429  ?  -19.82200  -13.62016    3.94634  0.460   17.63725  N   ?  A  ?   404  1
  ATOM    3222  N    .  GLU  A  430  ?  -19.73116  -16.29343   11.76756  1.000   17.71155  N   ?  A  ?   405  1
  ATOM    3223  CA   .  GLU  A  430  ?  -20.12114  -17.40373   12.61975  1.000   20.16539  C   ?  A  ?   405  1
  ATOM    3224  C    .  GLU  A  430  ?  -20.75235  -16.89401   13.91215  1.000   19.98708  C   ?  A  ?   405  1
  ATOM    3225  O    .  GLU  A  430  ?  -20.23792  -15.95539   14.52881  1.000   20.54449  O   ?  A  ?   405  1
  ATOM    3226  CB   .  GLU  A  430  ?  -18.91410  -18.27909   12.93844  1.000   21.96629  C   ?  A  ?   405  1
  ATOM    3227  CG   .  GLU  A  430  ?  -18.37128  -19.02843   11.74083  1.000   23.21313  C   ?  A  ?   405  1
  ATOM    3228  CD   .  GLU  A  430  ?  -19.34260  -20.07039   11.22768  1.000   27.04896  C   ?  A  ?   405  1
  ATOM    3229  OE1  .  GLU  A  430  ?  -20.13204  -20.60238   12.03885  1.000   26.63619  O   ?  A  ?   405  1
  ATOM    3230  OE2  .  GLU  A  430  ?  -19.32153  -20.35349   10.01121  1.000   29.99494  O   ?  A  ?   405  1
  ATOM    3231  N    .  PRO  A  431  ?  -21.86071  -17.49839   14.35090  1.000   20.12748  N   ?  A  ?   406  1
  ATOM    3232  CA   .  PRO  A  431  ?  -22.50308  -17.04272   15.59245  1.000   17.36096  C   ?  A  ?   406  1
  ATOM    3233  C    .  PRO  A  431  ?  -21.67044  -17.28707   16.83478  1.000   13.75584  C   ?  A  ?   406  1
  ATOM    3234  O    .  PRO  A  431  ?  -21.93764  -16.66343   17.86843  1.000   14.95553  O   ?  A  ?   406  1
  ATOM    3235  CB   .  PRO  A  431  ?  -23.80352  -17.85592   15.63241  1.000   21.45612  C   ?  A  ?   406  1
  ATOM    3236  CG   .  PRO  A  431  ?  -23.49427  -19.08531   14.84454  1.000   20.67484  C   ?  A  ?   406  1
  ATOM    3237  CD   .  PRO  A  431  ?  -22.57657  -18.63329   13.74269  1.000   20.88045  C   ?  A  ?   406  1
  ATOM    3238  N    .  SER  A  432  ?  -20.68223  -18.17411   16.77613  1.000   13.35015  N   ?  A  ?   407  1
  ATOM    3239  CA   .  SER  A  432  ?  -19.84759  -18.46460   17.93155  1.000   14.36914  C   ?  A  ?   407  1
  ATOM    3240  C    .  SER  A  432  ?  -18.61235  -17.58116   18.01601  1.000   10.49286  C   ?  A  ?   407  1
  ATOM    3241  O    .  SER  A  432  ?  -17.90715  -17.63224   19.02840  1.000    9.52751  O   ?  A  ?   407  1
  ATOM    3242  CB   .  SER  A  432  ?  -19.41028  -19.93307   17.91156  1.000   14.61483  C   ?  A  ?   407  1
  ATOM    3243  OG   .  SER  A  432  ?  -18.60801  -20.21348   16.77937  1.000   12.42459  O   ?  A  ?   407  1
  ATOM    3244  N    .  VAL  A  433  ?  -18.34037  -16.77661   16.99390  1.000    8.17365  N   ?  A  ?   408  1
  ATOM    3245  CA   .  VAL  A  433  ?  -17.08490  -16.04017   16.88696  1.000    6.70205  C   ?  A  ?   408  1
  ATOM    3246  C    .  VAL  A  433  ?  -17.25810  -14.64287   17.46840  1.000    8.49603  C   ?  A  ?   408  1
  ATOM    3247  O    .  VAL  A  433  ?  -18.10179  -13.86865   17.00483  1.000   11.92201  O   ?  A  ?   408  1
  ATOM    3248  CB   .  VAL  A  433  ?  -16.61420  -15.96684   15.42720  1.000    9.81035  C   ?  A  ?   408  1
  ATOM    3249  CG1  .  VAL  A  433  ?  -15.51324  -14.93382   15.27960  1.000   11.27389  C   ?  A  ?   408  1
  ATOM    3250  CG2  .  VAL  A  433  ?  -16.13745  -17.33000   14.95775  1.000   12.37913  C   ?  A  ?   408  1
  ATOM    3251  N    .  LEU  A  434  ?  -16.44608  -14.31480   18.47428  1.000    5.71396  N   ?  A  ?   409  1
  ATOM    3252  CA   .  LEU  A  434  ?  -16.39258  -12.96319   19.01995  1.000    6.33688  C   ?  A  ?   409  1
  ATOM    3253  C    .  LEU  A  434  ?  -15.36167  -12.10366   18.28813  1.000    5.75285  C   ?  A  ?   409  1
  ATOM    3254  O    .  LEU  A  434  ?  -15.68415  -11.00057   17.83557  1.000    4.18717  O   ?  A  ?   409  1
  ATOM    3255  CB   .  LEU  A  434  ?  -16.08812  -13.01320   20.52180  1.000    8.00044  C   ?  A  ?   409  1
  ATOM    3256  CG   .  LEU  A  434  ?  -16.13679  -11.68415   21.27891  1.000    5.58643  C   ?  A  ?   409  1
  ATOM    3257  CD1  .  LEU  A  434  ?  -17.52336  -11.06800   21.19617  1.000    2.93367  C   ?  A  ?   409  1
  ATOM    3258  CD2  .  LEU  A  434  ?  -15.71921  -11.87659   22.73137  1.000    7.39917  C   ?  A  ?   409  1
  ATOM    3259  N    .  TYR  A  435  ?  -14.12882  -12.60068   18.15151  1.000    8.84871  N   ?  A  ?   410  1
  ATOM    3260  CA   .  TYR  A  435  ?  -13.07528  -11.92201   17.40547  1.000    7.13856  C   ?  A  ?   410  1
  ATOM    3261  C    .  TYR  A  435  ?  -12.36590  -12.90802   16.48252  1.000    5.62875  C   ?  A  ?   410  1
  ATOM    3262  O    .  TYR  A  435  ?  -12.24687  -14.09558   16.79305  1.000    3.43918  O   ?  A  ?   410  1
  ATOM    3263  CB   .  TYR  A  435  ?  -12.02027  -11.27943   18.32405  1.000   11.43863  C   ?  A  ?   410  1
  ATOM    3264  CG   .  TYR  A  435  ?  -12.54833  -10.44815   19.47207  1.000    2.90717  C   ?  A  ?   410  1
  ATOM    3265  CD1  .  TYR  A  435  ?  -12.32587  -10.83340   20.78635  1.000    8.28373  C   ?  A  ?   410  1
  ATOM    3266  CD2  .  TYR  A  435  ?  -13.23982   -9.26677   19.24583  1.000    2.90163  C   ?  A  ?   410  1
  ATOM    3267  CE1  .  TYR  A  435  ?  -12.79136  -10.07788   21.83983  1.000    6.69510  C   ?  A  ?   410  1
  ATOM    3268  CE2  .  TYR  A  435  ?  -13.71382   -8.50258   20.29834  1.000    7.52479  C   ?  A  ?   410  1
  ATOM    3269  CZ   .  TYR  A  435  ?  -13.48597   -8.91666   21.59156  1.000    5.23297  C   ?  A  ?   410  1
  ATOM    3270  OH   .  TYR  A  435  ?  -13.94915   -8.16753   22.64423  1.000    4.38107  O   ?  A  ?   410  1
  ATOM    3271  N    .  VAL  A  436  ?  -11.89794  -12.39481   15.33963  1.000    6.20852  N   ?  A  ?   411  1
  ATOM    3272  CA   .  VAL  A  436  ?  -10.95423  -13.07488   14.45162  1.000    7.72437  C   ?  A  ?   411  1
  ATOM    3273  C    .  VAL  A  436  ?   -9.87070  -12.07855   14.07651  1.000    5.93949  C   ?  A  ?   411  1
  ATOM    3274  O    .  VAL  A  436  ?  -10.17340  -10.93053   13.73797  1.000   10.63631  O   ?  A  ?   411  1
  ATOM    3275  CB   .  VAL  A  436  ?  -11.59857  -13.59807   13.14782  1.000   10.30647  C   ?  A  ?   411  1
  ATOM    3276  CG1  .  VAL  A  436  ?  -11.13986  -15.01825   12.83691  1.000    9.32378  C   ?  A  ?   411  1
  ATOM    3277  CG2  .  VAL  A  436  ?  -13.09583  -13.43567   13.15144  1.000   14.58900  C   ?  A  ?   411  1
  ATOM    3278  N    .  LEU  A  437  ?   -8.61643  -12.51775   14.08229  1.000    3.18541  N   ?  A  ?   412  1
  ATOM    3279  CA   .  LEU  A  437  ?   -7.55403  -11.58941   13.72157  1.000    7.56566  C   ?  A  ?   412  1
  ATOM    3280  C    .  LEU  A  437  ?   -6.31756  -12.35161   13.27075  1.000    7.55949  C   ?  A  ?   412  1
  ATOM    3281  O    .  LEU  A  437  ?   -6.09947  -13.50482   13.65579  1.000    6.60777  O   ?  A  ?   412  1
  ATOM    3282  CB   .  LEU  A  437  ?   -7.20273  -10.65536   14.88541  1.000    8.04842  C   ?  A  ?   412  1
  ATOM    3283  CG   .  LEU  A  437  ?   -6.66176  -11.31343   16.15681  1.000   10.34927  C   ?  A  ?   412  1
  ATOM    3284  CD1  .  LEU  A  437  ?   -5.80567  -10.32849   16.93294  1.000   11.26967  C   ?  A  ?   412  1
  ATOM    3285  CD2  .  LEU  A  437  ?   -7.78854  -11.84219   17.04181  1.000   12.28428  C   ?  A  ?   412  1
  ATOM    3286  N    .  SER  A  438  ?   -5.51697  -11.68435   12.44408  1.000    6.39975  N   ?  A  ?   413  1
  ATOM    3287  CA   .  SER  A  438  ?   -4.23457  -12.22769   12.02626  1.000    7.13638  C   ?  A  ?   413  1
  ATOM    3288  C    .  SER  A  438  ?   -3.23388  -12.15532   13.17147  1.000    3.53153  C   ?  A  ?   413  1
  ATOM    3289  O    .  SER  A  438  ?   -3.16162  -11.15589   13.89027  1.000    7.28709  O   ?  A  ?   413  1
  ATOM    3290  CB   .  SER  A  438  ?   -3.70867  -11.45428   10.82174  1.000    9.58930  C   ?  A  ?   413  1
  ATOM    3291  OG   .  SER  A  438  ?   -2.36894  -11.80507   10.53907  1.000   13.27140  O   ?  A  ?   413  1
  ATOM    3292  O    .  THR  A  439  ?    0.59260  -12.11350   14.94121  1.000    6.52349  O   ?  A  ?   414  1
  ATOM    3293  N    .  THR  A  439  ?   -2.45427  -13.22375   13.34337  1.000    7.73116  N   ?  A  ?   414  1
  ATOM    3294  CA   .  THR  A  439  ?   -1.44560  -13.22236   14.39637  1.000    6.89831  C   ?  A  ?   414  1
  ATOM    3295  C    .  THR  A  439  ?   -0.26763  -12.31075   14.07616  1.000    8.37648  C   ?  A  ?   414  1
  ATOM    3296  CB   .  THR  A  439  ?   -0.95089  -14.64513   14.66678  1.000    8.05725  C   ?  A  ?   414  1
  ATOM    3297  OG1  .  THR  A  439  ?   -0.59494  -15.27852   13.43293  1.000    5.62402  O   ?  A  ?   414  1
  ATOM    3298  CG2  .  THR  A  439  ?   -2.02715  -15.46356   15.36312  1.000    7.65725  C   ?  A  ?   414  1
  ATOM    3299  O    .  ASP  A  440  ?    1.06750   -8.37977   12.93939  1.000   15.63558  O   ?  A  ?   415  1
  ATOM    3300  N    .  ASP  A  440  ?   -0.20893  -11.75737   12.86257  1.000    8.15328  N   ?  A  ?   415  1
  ATOM    3301  CA   .  ASP  A  440  ?    0.74202  -10.70379   12.53237  1.000   11.17809  C   ?  A  ?   415  1
  ATOM    3302  C    .  ASP  A  440  ?    0.27065   -9.32364   12.96483  1.000   12.84667  C   ?  A  ?   415  1
  ATOM    3303  CB   .  ASP  A  440  ?    1.00869  -10.67623   11.02556  1.000   17.36009  C   ?  A  ?   415  1
  ATOM    3304  CG   .  ASP  A  440  ?    1.95034  -11.76673   10.58214  1.000   24.43186  C   ?  A  ?   415  1
  ATOM    3305  OD1  .  ASP  A  440  ?    2.70884  -12.27512   11.43475  1.000   26.68606  O   ?  A  ?   415  1
  ATOM    3306  OD2  .  ASP  A  440  ?    1.93846  -12.11030    9.38107  1.000   26.38084  O   ?  A  ?   415  1
  ATOM    3307  O    .  GLU  A  441  ?   -3.56757   -7.52688   14.94744  1.000    9.10194  O   ?  A  ?   416  1
  ATOM    3308  N    .  GLU  A  441  ?   -0.99694   -9.17589   13.33972  1.000    8.82523  N   ?  A  ?   416  1
  ATOM    3309  CA   .  GLU  A  441  ?   -1.57270   -7.86986   13.64301  1.000    7.54982  C   ?  A  ?   416  1
  ATOM    3310  C    .  GLU  A  441  ?   -2.41045   -7.94540   14.91238  1.000    7.70325  C   ?  A  ?   416  1
  ATOM    3311  CB   .  GLU  A  441  ?   -2.41535   -7.36101   12.47644  1.000   12.27354  C   ?  A  ?   416  1
  ATOM    3312  CG   .  GLU  A  441  ?   -1.69174   -7.31963   11.14720  1.000   19.71476  C   ?  A  ?   416  1
  ATOM    3313  CD   .  GLU  A  441  ?   -2.56302   -6.76504   10.04305  1.000   26.30221  C   ?  A  ?   416  1
  ATOM    3314  OE1  .  GLU  A  441  ?   -3.01210   -5.60608   10.16497  1.000   31.21710  O   ?  A  ?   416  1
  ATOM    3315  OE2  .  GLU  A  441  ?   -2.81509   -7.49305    9.06180  1.000   29.18979  O   ?  A  ?   416  1
  ATOM    3316  O    .  ILE  A  442  ?   -3.68041   -6.89320   18.45990  1.000    6.20598  O   ?  A  ?   417  1
  ATOM    3317  N    .  ILE  A  442  ?   -1.82277   -8.48405   15.97916  1.000    6.27775  N   ?  A  ?   417  1
  ATOM    3318  CA   .  ILE  A  442  ?   -2.55058   -8.62483   17.23477  1.000    6.41346  C   ?  A  ?   417  1
  ATOM    3319  C    .  ILE  A  442  ?   -2.61968   -7.29618   17.96997  1.000    7.00337  C   ?  A  ?   417  1
  ATOM    3320  CB   .  ILE  A  442  ?   -1.89815   -9.70565   18.11566  1.000    9.19049  C   ?  A  ?   417  1
  ATOM    3321  CG1  .  ILE  A  442  ?   -1.83195  -11.04288   17.37845  1.000    8.73917  C   ?  A  ?   417  1
  ATOM    3322  CG2  .  ILE  A  442  ?   -2.65419   -9.83560   19.43379  1.000    8.36362  C   ?  A  ?   417  1
  ATOM    3323  CD1  .  ILE  A  442  ?   -0.94261  -12.06658   18.05207  1.000    6.97466  C   ?  A  ?   417  1
  ATOM    3324  O    .  TRP  A  443  ?   -2.89714   -3.60546   19.30856  1.000    8.00236  O   ?  A  ?   418  1
  ATOM    3325  N    .  TRP  A  443  ?   -1.48562   -6.60099   18.06343  1.000    8.90589  N   ?  A  ?   418  1
  ATOM    3326  CA   .  TRP  A  443  ?   -1.40164   -5.44381   18.94461  1.000   10.43110  C   ?  A  ?   418  1
  ATOM    3327  C    .  TRP  A  443  ?   -2.31322   -4.31534   18.48238  1.000    7.87511  C   ?  A  ?   418  1
  ATOM    3328  CB   .  TRP  A  443  ?    0.04427   -4.96430   19.04171  1.000   14.82385  C   ?  A  ?   418  1
  ATOM    3329  CG   .  TRP  A  443  ?    0.27125   -4.13075   20.24624  1.000   20.15479  C   ?  A  ?   418  1
  ATOM    3330  CD1  .  TRP  A  443  ?    0.72789   -2.84865   20.28318  1.000   19.79431  C   ?  A  ?   418  1
  ATOM    3331  CD2  .  TRP  A  443  ?    0.01792   -4.50898   21.60375  1.000   25.80410  C   ?  A  ?   418  1
  ATOM    3332  NE1  .  TRP  A  443  ?    0.79363   -2.40853   21.58255  1.000   20.62251  N   ?  A  ?   418  1
  ATOM    3333  CE2  .  TRP  A  443  ?    0.36096   -3.40943   22.41260  1.000   24.89111  C   ?  A  ?   418  1
  ATOM    3334  CE3  .  TRP  A  443  ?   -0.45738   -5.67536   22.21457  1.000   27.48431  C   ?  A  ?   418  1
  ATOM    3335  CZ2  .  TRP  A  443  ?    0.24151   -3.43864   23.79983  1.000   26.21512  C   ?  A  ?   418  1
  ATOM    3336  CZ3  .  TRP  A  443  ?   -0.57697   -5.70221   23.58892  1.000   27.44649  C   ?  A  ?   418  1
  ATOM    3337  CH2  .  TRP  A  443  ?   -0.22760   -4.59208   24.36780  1.000   27.26045  C   ?  A  ?   418  1
  ATOM    3338  O    .  GLU  A  444  ?   -5.52789   -2.50933   16.15712  1.000   10.72610  O   ?  A  ?   419  1
  ATOM    3339  N    .  GLU  A  444  ?   -2.46128   -4.14292   17.17389  1.000    5.62389  N   ?  A  ?   419  1
  ATOM    3340  CA   .  GLU  A  444  ?   -3.25842   -3.04993   16.63849  1.000   10.06686  C   ?  A  ?   419  1
  ATOM    3341  C    .  GLU  A  444  ?   -4.73644   -3.39034   16.51044  1.000   10.19850  C   ?  A  ?   419  1
  ATOM    3342  CB   .  GLU  A  444  ?   -2.71858   -2.63423   15.27155  1.000   13.81095  C   ?  A  ?   419  1
  ATOM    3343  CG   .  GLU  A  444  ?   -2.91620   -3.68924   14.21104  1.000   19.18746  C   ?  A  ?   419  1
  ATOM    3344  CD   .  GLU  A  444  ?   -2.04619   -3.45649   13.00208  1.000   25.15642  C   ?  A  ?   419  1
  ATOM    3345  OE1  .  GLU  A  444  ?   -0.80830   -3.58163   13.12482  1.000   23.96738  O   ?  A  ?   419  1
  ATOM    3346  OE2  .  GLU  A  444  ?   -2.60081   -3.13717   11.93005  1.000   27.62133  O   ?  A  ?   419  1
  ATOM    3347  O    .  SER  A  445  ?   -6.96431   -3.89559   18.71139  1.000    4.45744  O   ?  A  ?   420  1
  ATOM    3348  N    .  SER  A  445  ?   -5.12498   -4.63308   16.78408  1.000    8.85772  N   ?  A  ?   420  1
  ATOM    3349  CA   .  SER  A  445  ?   -6.51479   -5.03674   16.63298  1.000    7.44684  C   ?  A  ?   420  1
  ATOM    3350  C    .  SER  A  445  ?   -7.40563   -4.31709   17.63862  1.000    6.99115  C   ?  A  ?   420  1
  ATOM    3351  CB   .  SER  A  445  ?   -6.65856   -6.54579   16.81310  1.000    8.02749  C   ?  A  ?   420  1
  ATOM    3352  OG   .  SER  A  445  ?   -6.37596   -6.91488   18.15131  1.000    7.84647  O   ?  A  ?   420  1
  ATOM    3353  O    .  SER  A  446  ?  -11.40679   -4.95025   19.02210  1.000   12.48809  O   ?  A  ?   421  1
  ATOM    3354  N    .  SER  A  446  ?   -8.68062   -4.18804   17.27892  1.000    7.45006  N   ?  A  ?   421  1
  ATOM    3355  CA   .  SER  A  446  ?   -9.66257   -3.51939   18.12956  1.000    8.83948  C   ?  A  ?   421  1
  ATOM    3356  C    .  SER  A  446  ?  -10.24992   -4.53569   19.10833  1.000   10.79337  C   ?  A  ?   421  1
  ATOM    3357  CB   .  SER  A  446  ?  -10.73529   -2.85898   17.27563  1.000    9.09244  C   ?  A  ?   421  1
  ATOM    3358  OG   .  SER  A  446  ?  -10.14833   -1.93813   16.37352  1.000    9.84367  O   ?  A  ?   421  1
  ATOM    3359  O    .  ILE  A  447  ?   -8.22899   -4.95504   22.59189  1.000    9.30762  O   ?  A  ?   422  1
  ATOM    3360  N    .  ILE  A  447  ?   -9.40589   -4.94059   20.05224  1.000   10.38101  N   ?  A  ?   422  1
  ATOM    3361  CA   .  ILE  A  447  ?   -9.75258   -5.95845   21.03980  1.000    9.12411  C   ?  A  ?   422  1
  ATOM    3362  C    .  ILE  A  447  ?   -9.34803   -5.45741   22.41927  1.000    8.61126  C   ?  A  ?   422  1
  ATOM    3363  CB   .  ILE  A  447  ?   -9.08050   -7.30042   20.71127  1.000   10.30491  C   ?  A  ?   422  1
  ATOM    3364  CG1  .  ILE  A  447  ?   -9.67446   -7.87880   19.43050  1.000   14.35464  C   ?  A  ?   422  1
  ATOM    3365  CG2  .  ILE  A  447  ?   -9.23812   -8.28713   21.85954  1.000   13.09597  C   ?  A  ?   422  1
  ATOM    3366  CD1  .  ILE  A  447  ?   -8.84035   -8.96007   18.81703  1.000   18.28669  C   ?  A  ?   422  1
  ATOM    3367  O    .  PRO  A  448  ?   -8.77494   -7.14964   25.18611  1.000    9.16955  O   ?  A  ?   423  1
  ATOM    3368  N    .  PRO  A  448  ?  -10.21504   -5.56703   23.41858  1.000    5.69640  N   ?  A  ?   423  1
  ATOM    3369  CA   .  PRO  A  448  ?   -9.88373   -5.05118   24.74613  1.000    8.02153  C   ?  A  ?   423  1
  ATOM    3370  C    .  PRO  A  448  ?   -8.94270   -5.97210   25.50344  1.000    8.12606  C   ?  A  ?   423  1
  ATOM    3371  CB   .  PRO  A  448  ?  -11.24611   -4.98398   25.44263  1.000    7.90082  C   ?  A  ?   423  1
  ATOM    3372  CG   .  PRO  A  448  ?  -12.02057   -6.08493   24.81247  1.000    8.04331  C   ?  A  ?   423  1
  ATOM    3373  CD   .  PRO  A  448  ?  -11.57857   -6.12412   23.37045  1.000    6.55995  C   ?  A  ?   423  1
  ATOM    3374  O    .  GLU  A  449  ?   -9.77527   -6.34417   28.54386  1.000   16.10083  O   ?  A  ?   424  1
  ATOM    3375  N    .  GLU  A  449  ?   -8.32861   -5.40235   26.52898  1.000    8.03292  N   ?  A  ?   424  1
  ATOM    3376  CA   .  GLU  A  449  ?   -7.62077   -6.19558   27.51037  1.000    9.09020  C   ?  A  ?   424  1
  ATOM    3377  C    .  GLU  A  449  ?   -8.66445   -6.85624   28.41131  1.000   12.58828  C   ?  A  ?   424  1
  ATOM    3378  CB   .  GLU  A  449  ?   -6.64814   -5.32400   28.30891  1.000    6.45385  C   ?  A  ?   424  1
  ATOM    3379  CG   .  GLU  A  449  ?   -5.53147   -4.71490   27.47065  1.000    7.42233  C   ?  A  ?   424  1
  ATOM    3380  CD   .  GLU  A  449  ?   -4.54300   -5.74424   26.94176  1.000   12.26930  C   ?  A  ?   424  1
  ATOM    3381  OE1  .  GLU  A  449  ?   -3.64197   -5.35332   26.17371  1.000   14.95792  O   ?  A  ?   424  1
  ATOM    3382  OE2  .  GLU  A  449  ?   -4.65069   -6.93705   27.29355  1.000   12.45049  O   ?  A  ?   424  1
  ATOM    3383  O    .  PRO  A  450  ?   -5.76679  -10.15050   27.59702  1.000   10.17554  O   ?  A  ?   425  1
  ATOM    3384  N    .  PRO  A  450  ?   -8.31976   -7.99956   29.02583  1.000   11.60939  N   ?  A  ?   425  1
  ATOM    3385  CA   .  PRO  A  450  ?   -7.00630   -8.64625   28.95418  1.000    8.47839  C   ?  A  ?   425  1
  ATOM    3386  C    .  PRO  A  450  ?   -6.82203   -9.54052   27.73373  1.000    8.06448  C   ?  A  ?   425  1
  ATOM    3387  CB   .  PRO  A  450  ?   -6.97428   -9.47838   30.23149  1.000    9.45839  C   ?  A  ?   425  1
  ATOM    3388  CG   .  PRO  A  450  ?   -8.39358   -9.89666   30.40355  1.000    7.93091  C   ?  A  ?   425  1
  ATOM    3389  CD   .  PRO  A  450  ?   -9.23769   -8.73956   29.91195  1.000    8.12068  C   ?  A  ?   425  1
  ATOM    3390  O    .  ILE  A  451  ?   -5.85496  -11.25111   24.49794  1.000    7.22662  O   ?  A  ?   426  1
  ATOM    3391  N    .  ILE  A  451  ?   -7.82377   -9.60120   26.85595  1.000    4.27681  N   ?  A  ?   426  1
  ATOM    3392  CA   .  ILE  A  451  ?   -7.78583  -10.56059   25.75570  1.000    3.76689  C   ?  A  ?   426  1
  ATOM    3393  C    .  ILE  A  451  ?   -6.57318  -10.31418   24.86645  1.000    6.38281  C   ?  A  ?   426  1
  ATOM    3394  CB   .  ILE  A  451  ?   -9.09617  -10.50887   24.95216  1.000    9.45955  C   ?  A  ?   426  1
  ATOM    3395  CG1  .  ILE  A  451  ?  -10.27896  -10.84559   25.85956  1.000    9.32371  C   ?  A  ?   426  1
  ATOM    3396  CG2  .  ILE  A  451  ?   -9.03732  -11.48103   23.78526  1.000    6.23583  C   ?  A  ?   426  1
  ATOM    3397  CD1  .  ILE  A  451  ?  -11.62392  -10.65200   25.20558  1.000    9.65247  C   ?  A  ?   426  1
  ATOM    3398  O    .  LYS  A  452  ?   -3.18816   -9.90883   23.26185  1.000    5.28790  O   ?  A  ?   427  1
  ATOM    3399  N    .  LYS  A  452  ?   -6.31606   -9.04919   24.52480  1.000    7.99240  N   ?  A  ?   427  1
  ATOM    3400  C    .  LYS  A  452  ?   -3.90462   -9.24341   24.01822  1.000    6.28742  C   ?  A  ?   427  1
  ATOM    3401  CA   .  LYS  A  452  ?   -5.26832   -8.73923   23.55439  1.000    7.18587  C   ?  A  ?   427  1
  ATOM    3402  CB   .  LYS  A  452  ?   -5.22993   -7.23437   23.28609  1.000    6.49805  C   ?  A  ?   427  1
  ATOM    3403  CG   .  LYS  A  452  ?   -4.11361   -6.80655   22.34685  1.000    9.60109  C   ?  A  ?   427  1
  ATOM    3404  CD   .  LYS  A  452  ?   -4.13164   -5.30524   22.08565  1.000   10.69257  C   ?  A  ?   427  1
  ATOM    3405  CE   .  LYS  A  452  ?   -5.28170   -4.91535   21.17446  1.000   14.17658  C   ?  A  ?   427  1
  ATOM    3406  NZ   .  LYS  A  452  ?   -5.26913   -3.46016   20.84665  1.000   13.94641  N   ?  A  ?   427  1
  ATOM    3407  O    A  SER  A  453  ?   -1.10162  -11.48504   25.82042  0.450    6.61704  O   ?  A  ?   428  1
  ATOM    3408  N    A  SER  A  453  ?   -3.53222   -8.94149   25.26484  0.450    5.65319  N   ?  A  ?   428  1
  ATOM    3409  CA   A  SER  A  453  ?   -2.23259   -9.37545   25.76818  0.450    6.54042  C   ?  A  ?   428  1
  ATOM    3410  C    A  SER  A  453  ?   -2.17386  -10.88639   25.96226  0.450    6.34830  C   ?  A  ?   428  1
  ATOM    3411  CB   A  SER  A  453  ?   -1.90869   -8.65783   27.07838  0.450    7.45133  C   ?  A  ?   428  1
  ATOM    3412  OG   A  SER  A  453  ?   -2.89370   -8.91936   28.06212  0.450    8.03487  O   ?  A  ?   428  1
  ATOM    3413  O    B  SER  A  453  ?   -1.10647  -11.49562   25.80072  0.550    6.63776  O   ?  A  ?   428  1
  ATOM    3414  N    B  SER  A  453  ?   -3.52813   -8.93985   25.26339  0.550    5.54917  N   ?  A  ?   428  1
  ATOM    3415  CA   B  SER  A  453  ?   -2.22773   -9.38152   25.75977  0.550    6.56625  C   ?  A  ?   428  1
  ATOM    3416  C    B  SER  A  453  ?   -2.17466  -10.89205   25.95179  0.550    6.41652  C   ?  A  ?   428  1
  ATOM    3417  CB   B  SER  A  453  ?   -1.89032   -8.66972   27.06864  0.550    7.44904  C   ?  A  ?   428  1
  ATOM    3418  OG   B  SER  A  453  ?   -1.58703   -7.30711   26.83585  0.550    8.76018  O   ?  A  ?   428  1
  ATOM    3419  N    .  ARG  A  454  ?   -3.30353  -11.51990   26.28818  1.000    2.74070  N   ?  A  ?   429  1
  ATOM    3420  CA   .  ARG  A  454  ?   -3.31233  -12.97262   26.40909  1.000    2.75627  C   ?  A  ?   429  1
  ATOM    3421  C    .  ARG  A  454  ?   -3.08319  -13.63013   25.05710  1.000    5.65484  C   ?  A  ?   429  1
  ATOM    3422  O    .  ARG  A  454  ?   -2.42383  -14.67356   24.97842  1.000    5.09120  O   ?  A  ?   429  1
  ATOM    3423  CB   .  ARG  A  454  ?   -4.62267  -13.44622   27.03808  1.000    3.07070  C   ?  A  ?   429  1
  ATOM    3424  CG   .  ARG  A  454  ?   -4.77512  -12.98827   28.47626  1.000    2.73623  C   ?  A  ?   429  1
  ATOM    3425  CD   .  ARG  A  454  ?   -5.94524  -13.65740   29.17188  1.000    5.77935  C   ?  A  ?   429  1
  ATOM    3426  NE   .  ARG  A  454  ?   -6.19903  -13.05329   30.47791  1.000    7.53061  N   ?  A  ?   429  1
  ATOM    3427  CZ   .  ARG  A  454  ?   -7.23502  -13.35544   31.25207  1.000   10.42899  C   ?  A  ?   429  1
  ATOM    3428  NH1  .  ARG  A  454  ?   -8.11911  -14.25991   30.85204  1.000   13.75438  N   ?  A  ?   429  1
  ATOM    3429  NH2  .  ARG  A  454  ?   -7.38947  -12.75041   32.42224  1.000   11.08984  N   ?  A  ?   429  1
  ATOM    3430  N    .  VAL  A  455  ?   -3.58930  -13.01633   23.98572  1.000    8.07822  N   ?  A  ?   430  1
  ATOM    3431  CA   .  VAL  A  455  ?   -3.32657  -13.52590   22.64524  1.000    4.80921  C   ?  A  ?   430  1
  ATOM    3432  C    .  VAL  A  455  ?   -1.85671  -13.34703   22.28881  1.000    4.91006  C   ?  A  ?   430  1
  ATOM    3433  O    .  VAL  A  455  ?   -1.24127  -14.23015   21.68058  1.000    3.04765  O   ?  A  ?   430  1
  ATOM    3434  CB   .  VAL  A  455  ?   -4.25370  -12.84282   21.62313  1.000    6.02252  C   ?  A  ?   430  1
  ATOM    3435  CG1  .  VAL  A  455  ?   -3.88401  -13.25595   20.20625  1.000    4.46564  C   ?  A  ?   430  1
  ATOM    3436  CG2  .  VAL  A  455  ?   -5.71062  -13.19251   21.91528  1.000    5.55927  C   ?  A  ?   430  1
  ATOM    3437  N    .  ILE  A  456  ?   -1.26774  -12.21218   22.67359  1.000    2.96229  N   ?  A  ?   431  1
  ATOM    3438  CA   .  ILE  A  456  ?    0.15965  -11.99348   22.44524  1.000    5.80856  C   ?  A  ?   431  1
  ATOM    3439  C    .  ILE  A  456  ?    0.97828  -13.04493   23.18033  1.000    2.95002  C   ?  A  ?   431  1
  ATOM    3440  O    .  ILE  A  456  ?    1.84144  -13.71033   22.59672  1.000    3.55225  O   ?  A  ?   431  1
  ATOM    3441  CB   .  ILE  A  456  ?    0.56542  -10.57494   22.88407  1.000    4.14910  C   ?  A  ?   431  1
  ATOM    3442  CG1  .  ILE  A  456  ?   -0.06752   -9.51601   21.98129  1.000    8.59821  C   ?  A  ?   431  1
  ATOM    3443  CG2  .  ILE  A  456  ?    2.07707  -10.43700   22.87978  1.000    5.50884  C   ?  A  ?   431  1
  ATOM    3444  CD1  .  ILE  A  456  ?    0.68480   -9.29113   20.69643  1.000    8.76570  C   ?  A  ?   431  1
  ATOM    3445  N    .  ASN  A  457  ?    0.71881  -13.20152   24.47968  1.000    4.03099  N   ?  A  ?   432  1
  ATOM    3446  CA   .  ASN  A  457  ?    1.46505  -14.15704   25.29109  1.000    5.37819  C   ?  A  ?   432  1
  ATOM    3447  C    .  ASN  A  457  ?    1.36576  -15.57469   24.74545  1.000    5.05954  C   ?  A  ?   432  1
  ATOM    3448  O    .  ASN  A  457  ?    2.33198  -16.34067   24.83263  1.000    5.55716  O   ?  A  ?   432  1
  ATOM    3449  CB   .  ASN  A  457  ?    0.96566  -14.11015   26.73443  1.000    4.66325  C   ?  A  ?   432  1
  ATOM    3450  CG   .  ASN  A  457  ?    1.34435  -12.82707   27.43582  1.000    5.07501  C   ?  A  ?   432  1
  ATOM    3451  OD1  .  ASN  A  457  ?    2.23145  -12.10323   26.98950  1.000    5.90268  O   ?  A  ?   432  1
  ATOM    3452  ND2  .  ASN  A  457  ?    0.68056  -12.54325   28.54965  1.000    4.49029  N   ?  A  ?   432  1
  ATOM    3453  N    .  GLY  A  458  ?    0.21655  -15.94270   24.18410  1.000    3.40026  N   ?  A  ?   433  1
  ATOM    3454  CA   .  GLY  A  458  ?    0.03799  -17.28893   23.68466  1.000    2.82577  C   ?  A  ?   433  1
  ATOM    3455  C    .  GLY  A  458  ?    0.54539  -17.52980   22.28396  1.000    4.93908  C   ?  A  ?   433  1
  ATOM    3456  O    .  GLY  A  458  ?    0.53658  -18.67782   21.82999  1.000    5.26381  O   ?  A  ?   433  1
  ATOM    3457  N    .  TYR  A  459  ?    0.99227  -16.48971   21.58604  1.000    4.36459  N   ?  A  ?   434  1
  ATOM    3458  CA   .  TYR  A  459  ?    1.38476  -16.62540   20.18821  1.000    2.86275  C   ?  A  ?   434  1
  ATOM    3459  C    .  TYR  A  459  ?    2.87544  -16.93336   20.09565  1.000    5.08378  C   ?  A  ?   434  1
  ATOM    3460  O    .  TYR  A  459  ?    3.71486  -16.05683   20.32260  1.000    6.55728  O   ?  A  ?   434  1
  ATOM    3461  CB   .  TYR  A  459  ?    1.04180  -15.37018   19.39344  1.000    2.86230  C   ?  A  ?   434  1
  ATOM    3462  CG   .  TYR  A  459  ?    1.55096  -15.46094   17.98093  1.000    7.15012  C   ?  A  ?   434  1
[truncated: 615,730 more chars]
